# Supplementary material
Source: publisher site journal article supplement (https://www.dovepress.com/article/408770)
Supplement: Supplementary file 1 [file get_supplementary_file.php]

Table S1: Raw data.

| number | Sex    | Age | BMI                   | ASA | Drinking history | Smoking history | Surgical history |
|--------|--------|-----|-----------------------|-----|------------------|-----------------|------------------|
| 1      | Male   | <65 | ≥25 kg/m <sup>2</sup> | <3  | No               | Yes             | Yes              |
| 2      | Female | <65 | <25 kg/m <sup>2</sup> | <3  | Yes              | No              | Yes              |
| 3      | Male   | ≥65 | ≥25 kg/m <sup>2</sup> | <3  | Yes              | Yes             | No               |
| 4      | Male   | ≥65 | ≥25 kg/m <sup>2</sup> | ≥3  | No               | No              | Yes              |
| 5      | Male   | <65 | <25 kg/m <sup>2</sup> | ≥3  | No               | No              | Yes              |
| 6      | Male   | <65 | ≥25 kg/m <sup>2</sup> | ≥3  | No               | No              | No               |
| 7      | Female | <65 | <25 kg/m <sup>2</sup> | <3  | Yes              | Yes             | Yes              |
| 8      | Male   | <65 | ≥25 kg/m <sup>2</sup> | ≥3  | No               | No              | No               |
| 9      | Female | <65 | <25 kg/m <sup>2</sup> | <3  | Yes              | No              | Yes              |
| 10     | Male   | <65 | <25 kg/m <sup>2</sup> | <3  | Yes              | No              | Yes              |
| 11     | Male   | <65 | ≥25 kg/m <sup>2</sup> | ≥3  | Yes              | Yes             | No               |
| 12     | Female | ≥65 | ≥25 kg/m <sup>2</sup> | ≥3  | Yes              | No              | No               |
| 13     | Female | <65 | <25 kg/m <sup>2</sup> | <3  | Yes              | No              | No               |
| 14     | Male   | ≥65 | ≥25 kg/m <sup>2</sup> | ≥3  | Yes              | No              | No               |
| 15     | Male   | <65 | <25 kg/m <sup>2</sup> | ≥3  | Yes              | Yes             | No               |
| 16     | Female | ≥65 | ≥25 kg/m <sup>2</sup> | ≥3  | Yes              | Yes             | No               |
| 17     | Female | <65 | ≥25 kg/m <sup>2</sup> | ≥3  | Yes              | No              | No               |
| 18     | Male   | ≥65 | ≥25 kg/m <sup>2</sup> | ≥3  | No               | No              | No               |
| 19     | Male   | <65 | ≥25 kg/m <sup>2</sup> | ≥3  | No               | No              | No               |
| 20     | Female | <65 | ≥25 kg/m <sup>2</sup> | <3  | Yes              | No              | Yes              |
| 21     | Male   | <65 | ≥25 kg/m <sup>2</sup> | ≥3  | Yes              | No              | No               |
| 22     | Male   | <65 | ≥25 kg/m <sup>2</sup> | <3  | No               | No              | No               |
| 23     | Male   | ≥65 | <25 kg/m <sup>2</sup> | <3  | Yes              | Yes             | Yes              |
| 24     | Male   | ≥65 | <25 kg/m <sup>2</sup> | <3  | No               | Yes             | No               |
| 25     | Female | ≥65 | ≥25 kg/m <sup>2</sup> | ≥3  | Yes              | No              | No               |
| 26     | Male   | <65 | ≥25 kg/m <sup>2</sup> | <3  | Yes              | No              | Yes              |
| 27     | Male   | <65 | <25 kg/m <sup>2</sup> | ≥3  | Yes              | Yes             | No               |
| 28     | Male   | ≥65 | ≥25 kg/m <sup>2</sup> | ≥3  | Yes              | No              | No               |
| 29     | Female | ≥65 | ≥25 kg/m <sup>2</sup> | ≥3  | No               | No              | No               |
| 30     | Female | <65 | <25 kg/m <sup>2</sup> | <3  | No               | No              | No               |
| 31     | Male   | ≥65 | ≥25 kg/m <sup>2</sup> | <3  | No               | No              | No               |
| 32     | Male   | <65 | <25 kg/m <sup>2</sup> | ≥3  | Yes              | No              | No               |
| 33     | Female | ≥65 | <25 kg/m <sup>2</sup> | ≥3  | No               | Yes             | No               |
| 34     | Male   | ≥65 | ≥25 kg/m <sup>2</sup> | ≥3  | No               | Yes             | No               |
| 35     | Male   | <65 | <25 kg/m <sup>2</sup> | <3  | Yes              | Yes             | No               |
| 36     | Male   | ≥65 | ≥25 kg/m <sup>2</sup> | ≥3  | No               | Yes             | No               |
| 37     | Male   | <65 | <25 kg/m <sup>2</sup> | <3  | No               | Yes             | No               |
| 38     | Male   | ≥65 | ≥25 kg/m <sup>2</sup> | <3  | No               | Yes             | Yes              |
| 39     | Male   | <65 | <25 kg/m <sup>2</sup> | ≥3  | Yes              | Yes             | Yes              |
| 40     | Female | ≥65 | ≥25 kg/m <sup>2</sup> | <3  | Yes              | No              | No               |
| 41     | Female | <65 | <25 kg/m <sup>2</sup> | <3  | No               | No              | No               |
| 42     | Male   | ≥65 | ≥25 kg/m <sup>2</sup> | <3  | No               | Yes             | No               |
| 43     | Male   | <65 | ≥25 kg/m <sup>2</sup> | <3  | No               | No              | Yes              |
| 44     | Male   | <65 | <25 kg/m <sup>2</sup> | ≥3  | Yes              | No              | Yes              |
| 45     | Female | <65 | ≥25 kg/m <sup>2</sup> | <3  | Yes              | Yes             | No               |
| 46     | Female | <65 | <25 kg/m <sup>2</sup> | ≥3  | No               | No              | No               |
| 47     | Male   | ≥65 | ≥25 kg/m <sup>2</sup> | <3  | No               | Yes             | No               |
| 48     | Female | ≥65 | ≥25 kg/m <sup>2</sup> | ≥3  | Yes              | No              | No               |
| 49     | Female | ≥65 | <25 kg/m <sup>2</sup> | <3  | Yes              | Yes             | No               |
| 50     | Male   | ≥65 | <25 kg/m <sup>2</sup> | <3  | Yes              | No              | No               |
| 51     | Female | ≥65 | ≥25 kg/m <sup>2</sup> | ≥3  | No               | No              | No               |
| 52     | Male   | ≥65 | ≥25 kg/m <sup>2</sup> | ≥3  | Yes              | No              | No               |

|            |     |     |                   |    |     |     |     |
|------------|-----|-----|-------------------|----|-----|-----|-----|
| 53 Male    | ≥65 | ≥25 | kg/m <sup>2</sup> | <3 | No  | Yes | No  |
| 54 Male    | <65 | <25 | kg/m <sup>2</sup> | ≥3 | Yes | Yes | No  |
| 55 Male    | <65 | ≥25 | kg/m <sup>2</sup> | ≥3 | No  | No  | No  |
| 56 Male    | <65 | <25 | kg/m <sup>2</sup> | ≥3 | Yes | No  | No  |
| 57 Female  | <65 | <25 | kg/m <sup>2</sup> | <3 | Yes | No  | No  |
| 58 Male    | <65 | <25 | kg/m <sup>2</sup> | <3 | Yes | Yes | No  |
| 59 Female  | ≥65 | ≥25 | kg/m <sup>2</sup> | <3 | Yes | Yes | No  |
| 60 Female  | <65 | <25 | kg/m <sup>2</sup> | ≥3 | Yes | Yes | No  |
| 61 Male    | ≥65 | ≥25 | kg/m <sup>2</sup> | ≥3 | Yes | Yes | Yes |
| 62 Male    | <65 | <25 | kg/m <sup>2</sup> | ≥3 | No  | Yes | Yes |
| 63 Female  | <65 | ≥25 | kg/m <sup>2</sup> | <3 | Yes | Yes | No  |
| 64 Female  | <65 | ≥25 | kg/m <sup>2</sup> | <3 | Yes | Yes | No  |
| 65 Female  | ≥65 | ≥25 | kg/m <sup>2</sup> | <3 | Yes | Yes | No  |
| 66 Male    | ≥65 | ≥25 | kg/m <sup>2</sup> | ≥3 | Yes | No  | Yes |
| 67 Male    | ≥65 | ≥25 | kg/m <sup>2</sup> | ≥3 | Yes | Yes | Yes |
| 68 Female  | <65 | ≥25 | kg/m <sup>2</sup> | <3 | Yes | Yes | No  |
| 69 Male    | <65 | ≥25 | kg/m <sup>2</sup> | <3 | No  | Yes | No  |
| 70 Male    | ≥65 | ≥25 | kg/m <sup>2</sup> | ≥3 | Yes | Yes | No  |
| 71 Male    | ≥65 | ≥25 | kg/m <sup>2</sup> | <3 | Yes | No  | No  |
| 72 Male    | ≥65 | <25 | kg/m <sup>2</sup> | ≥3 | No  | Yes | No  |
| 73 Male    | <65 | <25 | kg/m <sup>2</sup> | ≥3 | Yes | Yes | No  |
| 74 Female  | <65 | ≥25 | kg/m <sup>2</sup> | <3 | No  | No  | No  |
| 75 Female  | <65 | ≥25 | kg/m <sup>2</sup> | ≥3 | No  | Yes | No  |
| 76 Male    | ≥65 | ≥25 | kg/m <sup>2</sup> | <3 | Yes | No  | No  |
| 77 Male    | <65 | <25 | kg/m <sup>2</sup> | <3 | Yes | No  | No  |
| 78 Female  | <65 | ≥25 | kg/m <sup>2</sup> | ≥3 | Yes | Yes | No  |
| 79 Male    | ≥65 | <25 | kg/m <sup>2</sup> | ≥3 | No  | No  | No  |
| 80 Male    | <65 | ≥25 | kg/m <sup>2</sup> | <3 | Yes | No  | No  |
| 81 Female  | ≥65 | ≥25 | kg/m <sup>2</sup> | <3 | Yes | No  | No  |
| 82 Female  | <65 | ≥25 | kg/m <sup>2</sup> | ≥3 | Yes | Yes | No  |
| 83 Male    | <65 | ≥25 | kg/m <sup>2</sup> | ≥3 | Yes | No  | Yes |
| 84 Male    | <65 | ≥25 | kg/m <sup>2</sup> | <3 | No  | No  | Yes |
| 85 Female  | <65 | ≥25 | kg/m <sup>2</sup> | <3 | No  | Yes | No  |
| 86 Male    | ≥65 | ≥25 | kg/m <sup>2</sup> | ≥3 | No  | Yes | No  |
| 87 Female  | ≥65 | <25 | kg/m <sup>2</sup> | ≥3 | Yes | Yes | No  |
| 88 Male    | <65 | ≥25 | kg/m <sup>2</sup> | ≥3 | Yes | No  | Yes |
| 89 Male    | <65 | ≥25 | kg/m <sup>2</sup> | ≥3 | Yes | Yes | Yes |
| 90 Female  | <65 | <25 | kg/m <sup>2</sup> | <3 | Yes | Yes | No  |
| 91 Female  | ≥65 | ≥25 | kg/m <sup>2</sup> | <3 | No  | No  | No  |
| 92 Male    | <65 | <25 | kg/m <sup>2</sup> | ≥3 | No  | No  | Yes |
| 93 Female  | ≥65 | ≥25 | kg/m <sup>2</sup> | ≥3 | No  | No  | No  |
| 94 Male    | <65 | <25 | kg/m <sup>2</sup> | ≥3 | No  | No  | No  |
| 95 Male    | <65 | ≥25 | kg/m <sup>2</sup> | ≥3 | Yes | No  | No  |
| 96 Male    | ≥65 | ≥25 | kg/m <sup>2</sup> | <3 | Yes | No  | No  |
| 97 Female  | ≥65 | <25 | kg/m <sup>2</sup> | ≥3 | No  | Yes | No  |
| 98 Male    | ≥65 | ≥25 | kg/m <sup>2</sup> | ≥3 | Yes | No  | No  |
| 99 Male    | ≥65 | ≥25 | kg/m <sup>2</sup> | ≥3 | Yes | Yes | No  |
| 100 Female | <65 | <25 | kg/m <sup>2</sup> | ≥3 | No  | Yes | No  |
| 101 Female | <65 | <25 | kg/m <sup>2</sup> | <3 | Yes | Yes | No  |
| 102 Female | ≥65 | ≥25 | kg/m <sup>2</sup> | ≥3 | No  | No  | No  |
| 103 Male   | ≥65 | ≥25 | kg/m <sup>2</sup> | ≥3 | No  | Yes | No  |
| 104 Male   | <65 | ≥25 | kg/m <sup>2</sup> | <3 | No  | No  | Yes |
| 105 Female | <65 | ≥25 | kg/m <sup>2</sup> | ≥3 | Yes | Yes | No  |
| 106 Female | <65 | ≥25 | kg/m <sup>2</sup> | <3 | No  | Yes | No  |

|     |        |     |     |                   |    |     |     |     |
|-----|--------|-----|-----|-------------------|----|-----|-----|-----|
| 107 | Male   | <65 | ≥25 | kg/m <sup>2</sup> | <3 | Yes | Yes | Yes |
| 108 | Female | <65 | ≥25 | kg/m <sup>2</sup> | <3 | Yes | Yes | No  |
| 109 | Female | <65 | <25 | kg/m <sup>2</sup> | ≥3 | Yes | Yes | No  |
| 110 | Male   | <65 | <25 | kg/m <sup>2</sup> | <3 | No  | Yes | Yes |
| 111 | Female | <65 | ≥25 | kg/m <sup>2</sup> | ≥3 | No  | No  | Yes |
| 112 | Female | <65 | <25 | kg/m <sup>2</sup> | ≥3 | Yes | No  | No  |
| 113 | Female | ≥65 | ≥25 | kg/m <sup>2</sup> | <3 | No  | Yes | No  |
| 114 | Female | ≥65 | ≥25 | kg/m <sup>2</sup> | ≥3 | No  | Yes | No  |
| 115 | Female | <65 | ≥25 | kg/m <sup>2</sup> | <3 | No  | Yes | No  |
| 116 | Female | <65 | <25 | kg/m <sup>2</sup> | ≥3 | No  | Yes | No  |
| 117 | Male   | <65 | <25 | kg/m <sup>2</sup> | <3 | No  | Yes | No  |
| 118 | Male   | <65 | <25 | kg/m <sup>2</sup> | <3 | Yes | Yes | No  |
| 119 | Female | <65 | <25 | kg/m <sup>2</sup> | ≥3 | No  | No  | No  |
| 120 | Female | <65 | <25 | kg/m <sup>2</sup> | <3 | Yes | Yes | Yes |
| 121 | Female | <65 | <25 | kg/m <sup>2</sup> | <3 | Yes | No  | Yes |
| 122 | Female | <65 | <25 | kg/m <sup>2</sup> | ≥3 | Yes | Yes | Yes |
| 123 | Male   | <65 | <25 | kg/m <sup>2</sup> | <3 | No  | Yes | Yes |
| 124 | Male   | <65 | <25 | kg/m <sup>2</sup> | <3 | No  | Yes | No  |
| 125 | Female | <65 | <25 | kg/m <sup>2</sup> | <3 | Yes | No  | Yes |
| 126 | Female | <65 | <25 | kg/m <sup>2</sup> | ≥3 | No  | No  | Yes |
| 127 | Female | <65 | <25 | kg/m <sup>2</sup> | ≥3 | No  | Yes | No  |
| 128 | Male   | <65 | <25 | kg/m <sup>2</sup> | ≥3 | No  | Yes | No  |
| 129 | Male   | <65 | <25 | kg/m <sup>2</sup> | <3 | No  | No  | No  |
| 130 | Female | <65 | <25 | kg/m <sup>2</sup> | <3 | Yes | No  | No  |
| 131 | Female | <65 | <25 | kg/m <sup>2</sup> | <3 | Yes | Yes | No  |
| 132 | Female | <65 | <25 | kg/m <sup>2</sup> | ≥3 | Yes | No  | No  |
| 133 | Female | <65 | <25 | kg/m <sup>2</sup> | <3 | Yes | Yes | No  |
| 134 | Female | <65 | <25 | kg/m <sup>2</sup> | <3 | Yes | Yes | Yes |
| 135 | Female | <65 | <25 | kg/m <sup>2</sup> | <3 | No  | No  | No  |
| 136 | Female | <65 | <25 | kg/m <sup>2</sup> | ≥3 | No  | No  | No  |
| 137 | Female | <65 | <25 | kg/m <sup>2</sup> | <3 | Yes | No  | Yes |
| 138 | Male   | ≥65 | ≥25 | kg/m <sup>2</sup> | ≥3 | No  | No  | Yes |
| 139 | Female | <65 | <25 | kg/m <sup>2</sup> | <3 | No  | Yes | No  |
| 140 | Male   | ≥65 | ≥25 | kg/m <sup>2</sup> | <3 | No  | Yes | No  |
| 141 | Female | ≥65 | <25 | kg/m <sup>2</sup> | <3 | No  | No  | Yes |
| 142 | Female | ≥65 | <25 | kg/m <sup>2</sup> | ≥3 | No  | No  | No  |
| 143 | Male   | <65 | <25 | kg/m <sup>2</sup> | ≥3 | No  | Yes | No  |
| 144 | Male   | ≥65 | <25 | kg/m <sup>2</sup> | <3 | Yes | No  | No  |
| 145 | Female | ≥65 | <25 | kg/m <sup>2</sup> | ≥3 | Yes | Yes | No  |
| 146 | Female | <65 | <25 | kg/m <sup>2</sup> | ≥3 | No  | Yes | No  |
| 147 | Female | <65 | ≥25 | kg/m <sup>2</sup> | ≥3 | Yes | No  | No  |
| 148 | Female | <65 | ≥25 | kg/m <sup>2</sup> | ≥3 | No  | No  | Yes |
| 149 | Female | <65 | <25 | kg/m <sup>2</sup> | ≥3 | No  | Yes | Yes |
| 150 | Female | <65 | ≥25 | kg/m <sup>2</sup> | ≥3 | Yes | No  | No  |
| 151 | Male   | <65 | <25 | kg/m <sup>2</sup> | ≥3 | Yes | Yes | No  |
| 152 | Male   | ≥65 | ≥25 | kg/m <sup>2</sup> | <3 | Yes | Yes | No  |
| 153 | Female | ≥65 | ≥25 | kg/m <sup>2</sup> | <3 | No  | Yes | No  |
| 154 | Female | ≥65 | ≥25 | kg/m <sup>2</sup> | ≥3 | Yes | No  | No  |
| 155 | Female | <65 | <25 | kg/m <sup>2</sup> | <3 | Yes | No  | No  |
| 156 | Female | ≥65 | <25 | kg/m <sup>2</sup> | ≥3 | Yes | Yes | No  |
| 157 | Female | ≥65 | <25 | kg/m <sup>2</sup> | <3 | No  | Yes | No  |
| 158 | Female | <65 | <25 | kg/m <sup>2</sup> | ≥3 | No  | No  | No  |
| 159 | Female | <65 | <25 | kg/m <sup>2</sup> | <3 | No  | Yes | No  |
| 160 | Female | <65 | <25 | kg/m <sup>2</sup> | ≥3 | Yes | No  | Yes |

|            |     |     |       |    |     |     |     |
|------------|-----|-----|-------|----|-----|-----|-----|
| 161 Male   | <65 | <25 | kg/m2 | <3 | No  | No  | No  |
| 162 Male   | <65 | <25 | kg/m2 | ≥3 | Yes | Yes | No  |
| 163 Female | <65 | ≥25 | kg/m2 | <3 | No  | Yes | No  |
| 164 Male   | <65 | ≥25 | kg/m2 | ≥3 | Yes | Yes | Yes |
| 165 Female | <65 | <25 | kg/m2 | ≥3 | No  | Yes | No  |
| 166 Female | <65 | <25 | kg/m2 | ≥3 | Yes | No  | Yes |
| 167 Female | <65 | <25 | kg/m2 | <3 | Yes | No  | No  |
| 168 Female | <65 | <25 | kg/m2 | <3 | Yes | Yes | No  |
| 169 Female | <65 | <25 | kg/m2 | <3 | No  | Yes | Yes |
| 170 Female | <65 | <25 | kg/m2 | <3 | No  | No  | Yes |
| 171 Female | <65 | <25 | kg/m2 | ≥3 | Yes | No  | Yes |
| 172 Female | <65 | <25 | kg/m2 | <3 | Yes | Yes | No  |
| 173 Female | <65 | <25 | kg/m2 | ≥3 | Yes | No  | No  |
| 174 Female | <65 | <25 | kg/m2 | <3 | Yes | Yes | No  |
| 175 Male   | <65 | <25 | kg/m2 | ≥3 | No  | Yes | No  |
| 176 Female | <65 | <25 | kg/m2 | <3 | Yes | No  | No  |
| 177 Female | <65 | <25 | kg/m2 | <3 | Yes | Yes | No  |
| 178 Female | <65 | <25 | kg/m2 | ≥3 | No  | No  | No  |
| 179 Female | ≥65 | ≥25 | kg/m2 | ≥3 | No  | Yes | No  |
| 180 Male   | ≥65 | ≥25 | kg/m2 | <3 | No  | No  | No  |
| 181 Male   | <65 | <25 | kg/m2 | ≥3 | No  | No  | No  |
| 182 Female | ≥65 | ≥25 | kg/m2 | <3 | Yes | No  | No  |
| 183 Female | <65 | <25 | kg/m2 | <3 | Yes | Yes | No  |
| 184 Female | <65 | <25 | kg/m2 | ≥3 | Yes | Yes | No  |
| 185 Female | ≥65 | <25 | kg/m2 | ≥3 | No  | No  | No  |
| 186 Female | ≥65 | <25 | kg/m2 | <3 | Yes | Yes | Yes |
| 187 Male   | <65 | <25 | kg/m2 | <3 | No  | No  | No  |
| 188 Female | ≥65 | <25 | kg/m2 | <3 | Yes | Yes | Yes |
| 189 Female | ≥65 | <25 | kg/m2 | ≥3 | Yes | No  | No  |
| 190 Female | <65 | <25 | kg/m2 | ≥3 | No  | No  | No  |
| 191 Male   | ≥65 | ≥25 | kg/m2 | ≥3 | No  | No  | Yes |
| 192 Female | <65 | <25 | kg/m2 | <3 | No  | Yes | No  |
| 193 Female | <65 | <25 | kg/m2 | <3 | No  | Yes | No  |
| 194 Female | <65 | <25 | kg/m2 | <3 | Yes | Yes | No  |
| 195 Female | <65 | ≥25 | kg/m2 | <3 | Yes | Yes | No  |
| 196 Female | <65 | ≥25 | kg/m2 | ≥3 | Yes | Yes | No  |
| 197 Male   | <65 | <25 | kg/m2 | <3 | Yes | No  | No  |
| 198 Male   | <65 | ≥25 | kg/m2 | ≥3 | No  | Yes | No  |
| 199 Male   | <65 | <25 | kg/m2 | ≥3 | Yes | No  | No  |
| 200 Female | <65 | <25 | kg/m2 | ≥3 | Yes | No  | No  |
| 201 Female | <65 | <25 | kg/m2 | ≥3 | Yes | Yes | No  |
| 202 Female | <65 | <25 | kg/m2 | <3 | Yes | No  | No  |
| 203 Female | <65 | <25 | kg/m2 | ≥3 | Yes | No  | Yes |
| 204 Female | <65 | <25 | kg/m2 | ≥3 | No  | Yes | Yes |
| 205 Female | <65 | <25 | kg/m2 | ≥3 | No  | No  | No  |
| 206 Male   | <65 | <25 | kg/m2 | <3 | Yes | Yes | No  |
| 207 Female | ≥65 | ≥25 | kg/m2 | <3 | Yes | No  | No  |
| 208 Male   | <65 | <25 | kg/m2 | <3 | Yes | No  | Yes |
| 209 Female | <65 | <25 | kg/m2 | ≥3 | No  | No  | Yes |
| 210 Female | <65 | <25 | kg/m2 | ≥3 | No  | Yes | Yes |
| 211 Male   | ≥65 | ≥25 | kg/m2 | <3 | No  | No  | Yes |
| 212 Female | ≥65 | ≥25 | kg/m2 | ≥3 | No  | Yes | Yes |
| 213 Female | <65 | <25 | kg/m2 | ≥3 | Yes | No  | No  |
| 214 Female | ≥65 | ≥25 | kg/m2 | ≥3 | No  | Yes | No  |

|     |        |     |     |                   |    |     |     |     |
|-----|--------|-----|-----|-------------------|----|-----|-----|-----|
| 215 | Female | ≥65 | ≥25 | kg/m <sup>2</sup> | ≥3 | Yes | Yes | No  |
| 216 | Male   | <65 | <25 | kg/m <sup>2</sup> | ≥3 | No  | No  | No  |
| 217 | Male   | ≥65 | <25 | kg/m <sup>2</sup> | <3 | Yes | No  | No  |
| 218 | Male   | <65 | <25 | kg/m <sup>2</sup> | ≥3 | Yes | No  | Yes |
| 219 | Female | <65 | <25 | kg/m <sup>2</sup> | ≥3 | No  | No  | Yes |
| 220 | Female | <65 | <25 | kg/m <sup>2</sup> | ≥3 | Yes | Yes | No  |
| 221 | Female | <65 | <25 | kg/m <sup>2</sup> | ≥3 | Yes | Yes | Yes |
| 222 | Male   | <65 | <25 | kg/m <sup>2</sup> | <3 | Yes | No  | No  |
| 223 | Male   | <65 | <25 | kg/m <sup>2</sup> | <3 | Yes | No  | No  |
| 224 | Female | <65 | ≥25 | kg/m <sup>2</sup> | ≥3 | No  | Yes | No  |
| 225 | Female | <65 | ≥25 | kg/m <sup>2</sup> | ≥3 | No  | No  | No  |
| 226 | Female | <65 | <25 | kg/m <sup>2</sup> | ≥3 | No  | Yes | No  |
| 227 | Female | <65 | <25 | kg/m <sup>2</sup> | <3 | Yes | Yes | No  |
| 228 | Female | <65 | <25 | kg/m <sup>2</sup> | ≥3 | Yes | Yes | No  |
| 229 | Male   | <65 | <25 | kg/m <sup>2</sup> | ≥3 | No  | Yes | No  |
| 230 | Male   | <65 | <25 | kg/m <sup>2</sup> | ≥3 | Yes | No  | No  |
| 231 | Female | <65 | <25 | kg/m <sup>2</sup> | <3 | No  | No  | No  |
| 232 | Female | ≥65 | <25 | kg/m <sup>2</sup> | <3 | No  | Yes | No  |
| 233 | Female | ≥65 | <25 | kg/m <sup>2</sup> | ≥3 | Yes | Yes | No  |
| 234 | Male   | <65 | <25 | kg/m <sup>2</sup> | <3 | Yes | No  | No  |
| 235 | Male   | ≥65 | ≥25 | kg/m <sup>2</sup> | <3 | No  | No  | Yes |
| 236 | Female | ≥65 | ≥25 | kg/m <sup>2</sup> | <3 | No  | Yes | No  |
| 237 | Male   | <65 | <25 | kg/m <sup>2</sup> | ≥3 | No  | No  | Yes |
| 238 | Female | ≥65 | ≥25 | kg/m <sup>2</sup> | ≥3 | Yes | Yes | Yes |
| 239 | Female | <65 | <25 | kg/m <sup>2</sup> | <3 | Yes | No  | No  |
| 240 | Female | ≥65 | ≥25 | kg/m <sup>2</sup> | ≥3 | Yes | Yes | Yes |
| 241 | Female | ≥65 | ≥25 | kg/m <sup>2</sup> | ≥3 | Yes | No  | No  |
| 242 | Female | <65 | <25 | kg/m <sup>2</sup> | <3 | No  | Yes | No  |
| 243 | Female | ≥65 | ≥25 | kg/m <sup>2</sup> | ≥3 | No  | No  | No  |
| 244 | Female | ≥65 | ≥25 | kg/m <sup>2</sup> | <3 | Yes | Yes | No  |
| 245 | Female | <65 | <25 | kg/m <sup>2</sup> | <3 | No  | Yes | No  |
| 246 | Male   | ≥65 | <25 | kg/m <sup>2</sup> | <3 | No  | Yes | No  |
| 247 | Male   | <65 | <25 | kg/m <sup>2</sup> | <3 | Yes | No  | No  |
| 248 | Male   | <65 | <25 | kg/m <sup>2</sup> | ≥3 | No  | Yes | No  |
| 249 | Male   | <65 | <25 | kg/m <sup>2</sup> | ≥3 | No  | No  | No  |
| 250 | Male   | ≥65 | <25 | kg/m <sup>2</sup> | ≥3 | Yes | No  | No  |
| 251 | Female | ≥65 | <25 | kg/m <sup>2</sup> | ≥3 | Yes | No  | Yes |
| 252 | Female | <65 | <25 | kg/m <sup>2</sup> | ≥3 | Yes | Yes | Yes |
| 253 | Female | <65 | <25 | kg/m <sup>2</sup> | <3 | Yes | No  | Yes |
| 254 | Female | <65 | <25 | kg/m <sup>2</sup> | <3 | Yes | Yes | No  |
| 255 | Female | <65 | <25 | kg/m <sup>2</sup> | ≥3 | Yes | No  | No  |
| 256 | Female | <65 | ≥25 | kg/m <sup>2</sup> | <3 | No  | No  | No  |
| 257 | Female | <65 | ≥25 | kg/m <sup>2</sup> | ≥3 | No  | No  | No  |
| 258 | Female | <65 | <25 | kg/m <sup>2</sup> | ≥3 | Yes | Yes | No  |
| 259 | Female | <65 | ≥25 | kg/m <sup>2</sup> | <3 | Yes | No  | No  |
| 260 | Female | <65 | ≥25 | kg/m <sup>2</sup> | ≥3 | No  | Yes | Yes |
| 261 | Female | <65 | <25 | kg/m <sup>2</sup> | <3 | Yes | No  | No  |
| 262 | Female | <65 | <25 | kg/m <sup>2</sup> | ≥3 | No  | No  | No  |
| 263 | Female | <65 | <25 | kg/m <sup>2</sup> | ≥3 | No  | Yes | Yes |
| 264 | Female | <65 | <25 | kg/m <sup>2</sup> | ≥3 | No  | Yes | No  |
| 265 | Female | <65 | <25 | kg/m <sup>2</sup> | ≥3 | Yes | Yes | No  |
| 266 | Female | <65 | <25 | kg/m <sup>2</sup> | ≥3 | No  | No  | No  |
| 267 | Male   | <65 | <25 | kg/m <sup>2</sup> | <3 | No  | Yes | No  |
| 268 | Female | <65 | <25 | kg/m <sup>2</sup> | <3 | Yes | No  | No  |

|     |        |     |     |       |    |     |     |     |
|-----|--------|-----|-----|-------|----|-----|-----|-----|
| 269 | Male   | <65 | <25 | kg/m2 | ≥3 | Yes | No  | No  |
| 270 | Male   | <65 | <25 | kg/m2 | ≥3 | No  | No  | No  |
| 271 | Female | <65 | <25 | kg/m2 | <3 | No  | No  | No  |
| 272 | Male   | <65 | <25 | kg/m2 | ≥3 | Yes | No  | No  |
| 273 | Female | <65 | <25 | kg/m2 | ≥3 | Yes | No  | No  |
| 274 | Female | <65 | <25 | kg/m2 | <3 | Yes | Yes | Yes |
| 275 | Female | <65 | <25 | kg/m2 | ≥3 | No  | No  | Yes |
| 276 | Female | <65 | <25 | kg/m2 | <3 | No  | Yes | Yes |
| 277 | Female | <65 | <25 | kg/m2 | <3 | Yes | No  | Yes |
| 278 | Male   | <65 | <25 | kg/m2 | ≥3 | No  | Yes | Yes |
| 279 | Male   | <65 | <25 | kg/m2 | ≥3 | No  | Yes | No  |
| 280 | Female | <65 | <25 | kg/m2 | ≥3 | No  | Yes | No  |
| 281 | Female | <65 | <25 | kg/m2 | <3 | No  | Yes | No  |
| 282 | Female | ≥65 | ≥25 | kg/m2 | ≥3 | Yes | Yes | No  |
| 283 | Female | ≥65 | ≥25 | kg/m2 | ≥3 | Yes | No  | No  |
| 284 | Female | <65 | <25 | kg/m2 | ≥3 | No  | Yes | No  |
| 285 | Male   | ≥65 | ≥25 | kg/m2 | <3 | No  | Yes | No  |
| 286 | Female | ≥65 | ≥25 | kg/m2 | ≥3 | No  | No  | No  |
| 287 | Female | <65 | <25 | kg/m2 | <3 | No  | No  | No  |
| 288 | Female | <65 | <25 | kg/m2 | ≥3 | Yes | Yes | No  |
| 289 | Male   | <65 | <25 | kg/m2 | ≥3 | Yes | No  | No  |
| 290 | Male   | <65 | <25 | kg/m2 | ≥3 | Yes | No  | No  |
| 291 | Male   | <65 | <25 | kg/m2 | ≥3 | No  | No  | Yes |
| 292 | Male   | <65 | <25 | kg/m2 | <3 | No  | No  | Yes |
| 293 | Female | ≥65 | ≥25 | kg/m2 | <3 | Yes | Yes | No  |
| 294 | Male   | ≥65 | ≥25 | kg/m2 | <3 | Yes | No  | Yes |
| 295 | Male   | <65 | <25 | kg/m2 | <3 | Yes | Yes | No  |
| 296 | Male   | ≥65 | ≥25 | kg/m2 | ≥3 | No  | Yes | No  |
| 297 | Female | <65 | <25 | kg/m2 | <3 | No  | Yes | No  |
| 298 | Female | <65 | <25 | kg/m2 | <3 | Yes | Yes | Yes |
| 299 | Female | <65 | <25 | kg/m2 | ≥3 | Yes | Yes | Yes |
| 300 | Female | ≥65 | ≥25 | kg/m2 | <3 | No  | No  | No  |
| 301 | Female | ≥65 | ≥25 | kg/m2 | <3 | No  | No  | Yes |
| 302 | Female | <65 | <25 | kg/m2 | ≥3 | Yes | No  | Yes |
| 303 | Female | <65 | <25 | kg/m2 | <3 | No  | Yes | No  |
| 304 | Female | <65 | <25 | kg/m2 | ≥3 | Yes | No  | No  |
| 305 | Female | <65 | <25 | kg/m2 | <3 | No  | No  | No  |
| 306 | Male   | <65 | <25 | kg/m2 | <3 | Yes | No  | No  |
| 307 | Male   | <65 | ≥25 | kg/m2 | <3 | Yes | Yes | No  |
| 308 | Male   | <65 | <25 | kg/m2 | ≥3 | No  | Yes | No  |
| 309 | Female | <65 | ≥25 | kg/m2 | ≥3 | Yes | No  | No  |
| 310 | Male   | <65 | <25 | kg/m2 | <3 | Yes | Yes | No  |
| 311 | Female | <65 | <25 | kg/m2 | ≥3 | Yes | Yes | No  |
| 312 | Female | <65 | <25 | kg/m2 | <3 | No  | Yes | No  |
| 313 | Female | <65 | <25 | kg/m2 | ≥3 | Yes | No  | Yes |
| 314 | Female | <65 | <25 | kg/m2 | ≥3 | Yes | Yes | No  |
| 315 | Female | ≥65 | ≥25 | kg/m2 | ≥3 | Yes | Yes | No  |
| 316 | Female | <65 | <25 | kg/m2 | <3 | Yes | No  | No  |
| 317 | Male   | ≥65 | ≥25 | kg/m2 | ≥3 | Yes | No  | No  |
| 318 | Male   | ≥65 | <25 | kg/m2 | <3 | No  | Yes | No  |
| 319 | Female | <65 | <25 | kg/m2 | ≥3 | Yes | Yes | No  |
| 320 | Female | <65 | <25 | kg/m2 | <3 | Yes | Yes | No  |
| 321 | Female | ≥65 | <25 | kg/m2 | ≥3 | Yes | Yes | No  |
| 322 | Female | <65 | <25 | kg/m2 | ≥3 | No  | Yes | Yes |

|     |        |     |     |                   |    |     |     |     |
|-----|--------|-----|-----|-------------------|----|-----|-----|-----|
| 323 | Female | <65 | <25 | kg/m <sup>2</sup> | <3 | Yes | No  | Yes |
| 324 | Female | <65 | <25 | kg/m <sup>2</sup> | ≥3 | No  | No  | No  |
| 325 | Male   | ≥65 | <25 | kg/m <sup>2</sup> | ≥3 | Yes | No  | No  |
| 326 | Female | <65 | <25 | kg/m <sup>2</sup> | ≥3 | No  | No  | No  |
| 327 | Female | <65 | <25 | kg/m <sup>2</sup> | <3 | No  | No  | No  |
| 328 | Female | <65 | <25 | kg/m <sup>2</sup> | <3 | Yes | No  | No  |
| 329 | Female | <65 | <25 | kg/m <sup>2</sup> | <3 | No  | No  | No  |
| 330 | Female | <65 | <25 | kg/m <sup>2</sup> | ≥3 | Yes | No  | No  |
| 331 | Male   | <65 | <25 | kg/m <sup>2</sup> | ≥3 | Yes | No  | No  |
| 332 | Male   | ≥65 | ≥25 | kg/m <sup>2</sup> | <3 | No  | Yes | No  |
| 333 | Female | <65 | <25 | kg/m <sup>2</sup> | <3 | No  | Yes | No  |
| 334 | Female | <65 | <25 | kg/m <sup>2</sup> | <3 | No  | Yes | Yes |
| 335 | Female | ≥65 | ≥25 | kg/m <sup>2</sup> | ≥3 | Yes | No  | No  |
| 336 | Female | ≥65 | ≥25 | kg/m <sup>2</sup> | ≥3 | No  | No  | No  |
| 337 | Female | <65 | <25 | kg/m <sup>2</sup> | ≥3 | No  | Yes | No  |
| 338 | Female | ≥65 | ≥25 | kg/m <sup>2</sup> | ≥3 | No  | Yes | No  |
| 339 | Male   | <65 | <25 | kg/m <sup>2</sup> | ≥3 | Yes | Yes | No  |
| 340 | Male   | <65 | <25 | kg/m <sup>2</sup> | ≥3 | No  | Yes | Yes |
| 341 | Female | <65 | <25 | kg/m <sup>2</sup> | ≥3 | Yes | No  | No  |
| 342 | Male   | <65 | <25 | kg/m <sup>2</sup> | ≥3 | No  | No  | Yes |
| 343 | Female | <65 | ≥25 | kg/m <sup>2</sup> | <3 | No  | No  | No  |
| 344 | Female | <65 | <25 | kg/m <sup>2</sup> | <3 | Yes | No  | No  |
| 345 | Female | <65 | <25 | kg/m <sup>2</sup> | ≥3 | No  | No  | Yes |
| 346 | Female | <65 | <25 | kg/m <sup>2</sup> | <3 | Yes | No  | Yes |
| 347 | Female | <65 | <25 | kg/m <sup>2</sup> | ≥3 | No  | No  | No  |
| 348 | Male   | <65 | ≥25 | kg/m <sup>2</sup> | ≥3 | Yes | No  | Yes |
| 349 | Male   | <65 | <25 | kg/m <sup>2</sup> | <3 | No  | Yes | Yes |
| 350 | Female | <65 | <25 | kg/m <sup>2</sup> | <3 | Yes | Yes | No  |
| 351 | Male   | <65 | <25 | kg/m <sup>2</sup> | <3 | Yes | Yes | Yes |
| 352 | Female | <65 | <25 | kg/m <sup>2</sup> | ≥3 | Yes | Yes | No  |
| 353 | Female | <65 | <25 | kg/m <sup>2</sup> | <3 | Yes | Yes | No  |
| 354 | Female | <65 | <25 | kg/m <sup>2</sup> | <3 | No  | No  | No  |
| 355 | Female | <65 | <25 | kg/m <sup>2</sup> | ≥3 | Yes | Yes | No  |
| 356 | Female | ≥65 | <25 | kg/m <sup>2</sup> | <3 | No  | Yes | No  |
| 357 | Female | ≥65 | <25 | kg/m <sup>2</sup> | ≥3 | Yes | No  | No  |
| 358 | Female | <65 | <25 | kg/m <sup>2</sup> | ≥3 | Yes | No  | No  |
| 359 | Male   | <65 | <25 | kg/m <sup>2</sup> | ≥3 | No  | No  | Yes |
| 360 | Female | <65 | <25 | kg/m <sup>2</sup> | <3 | No  | No  | No  |
| 361 | Female | <65 | <25 | kg/m <sup>2</sup> | <3 | Yes | Yes | No  |
| 362 | Female | <65 | <25 | kg/m <sup>2</sup> | <3 | No  | Yes | No  |
| 363 | Female | <65 | <25 | kg/m <sup>2</sup> | ≥3 | Yes | Yes | No  |
| 364 | Female | ≥65 | <25 | kg/m <sup>2</sup> | ≥3 | Yes | Yes | No  |
| 365 | Female | <65 | <25 | kg/m <sup>2</sup> | <3 | No  | No  | No  |
| 366 | Female | ≥65 | ≥25 | kg/m <sup>2</sup> | ≥3 | Yes | Yes | No  |
| 367 | Female | <65 | <25 | kg/m <sup>2</sup> | ≥3 | No  | No  | Yes |
| 368 | Female | <65 | <25 | kg/m <sup>2</sup> | <3 | No  | No  | Yes |
| 369 | Female | <65 | <25 | kg/m <sup>2</sup> | ≥3 | No  | Yes | Yes |
| 370 | Female | <65 | <25 | kg/m <sup>2</sup> | ≥3 | Yes | No  | Yes |
| 371 | Female | <65 | <25 | kg/m <sup>2</sup> | <3 | Yes | No  | Yes |
| 372 | Male   | <65 | <25 | kg/m <sup>2</sup> | ≥3 | Yes | No  | No  |
| 373 | Female | <65 | <25 | kg/m <sup>2</sup> | <3 | Yes | No  | No  |
| 374 | Male   | ≥65 | ≥25 | kg/m <sup>2</sup> | <3 | Yes | Yes | No  |
| 375 | Male   | <65 | <25 | kg/m <sup>2</sup> | <3 | No  | No  | No  |
| 376 | Female | <65 | <25 | kg/m <sup>2</sup> | ≥3 | Yes | Yes | No  |

|     |        |     |     |       |    |     |     |     |
|-----|--------|-----|-----|-------|----|-----|-----|-----|
| 377 | Male   | <65 | <25 | kg/m2 | <3 | Yes | Yes | Yes |
| 378 | Female | <65 | <25 | kg/m2 | <3 | Yes | No  | No  |
| 379 | Female | <65 | <25 | kg/m2 | ≥3 | No  | No  | No  |
| 380 | Female | <65 | <25 | kg/m2 | <3 | No  | Yes | No  |
| 381 | Male   | ≥65 | ≥25 | kg/m2 | <3 | Yes | No  | Yes |
| 382 | Male   | <65 | <25 | kg/m2 | ≥3 | Yes | No  | Yes |
| 383 | Female | <65 | <25 | kg/m2 | ≥3 | Yes | Yes | No  |
| 384 | Male   | ≥65 | ≥25 | kg/m2 | ≥3 | Yes | Yes | No  |
| 385 | Female | <65 | <25 | kg/m2 | ≥3 | Yes | Yes | No  |
| 386 | Female | <65 | <25 | kg/m2 | <3 | Yes | Yes | No  |
| 387 | Male   | <65 | ≥25 | kg/m2 | ≥3 | Yes | Yes | No  |
| 388 | Female | <65 | <25 | kg/m2 | <3 | Yes | No  | No  |
| 389 | Female | <65 | <25 | kg/m2 | ≥3 | No  | No  | No  |
| 390 | Female | <65 | <25 | kg/m2 | <3 | Yes | Yes | No  |
| 391 | Female | <65 | <25 | kg/m2 | ≥3 | Yes | Yes | No  |
| 392 | Female | <65 | <25 | kg/m2 | <3 | Yes | No  | Yes |
| 393 | Male   | <65 | <25 | kg/m2 | <3 | Yes | Yes | No  |
| 394 | Female | ≥65 | ≥25 | kg/m2 | <3 | No  | No  | No  |
| 395 | Female | <65 | <25 | kg/m2 | <3 | Yes | Yes | No  |
| 396 | Female | <65 | <25 | kg/m2 | <3 | No  | Yes | Yes |
| 397 | Female | ≥65 | ≥25 | kg/m2 | ≥3 | No  | No  | Yes |
| 398 | Female | <65 | <25 | kg/m2 | <3 | Yes | Yes | Yes |
| 399 | Female | <65 | <25 | kg/m2 | ≥3 | Yes | Yes | Yes |
| 400 | Female | <65 | <25 | kg/m2 | ≥3 | Yes | No  | Yes |
| 401 | Female | <65 | <25 | kg/m2 | ≥3 | No  | No  | No  |
| 402 | Female | <65 | <25 | kg/m2 | <3 | Yes | Yes | No  |
| 403 | Female | <65 | <25 | kg/m2 | ≥3 | No  | Yes | No  |
| 404 | Female | <65 | <25 | kg/m2 | <3 | No  | Yes | No  |
| 405 | Male   | <65 | <25 | kg/m2 | <3 | Yes | Yes | No  |
| 406 | Male   | <65 | <25 | kg/m2 | ≥3 | No  | Yes | Yes |
| 407 | Female | <65 | <25 | kg/m2 | ≥3 | No  | No  | No  |
| 408 | Female | <65 | <25 | kg/m2 | <3 | No  | No  | Yes |
| 409 | Female | <65 | <25 | kg/m2 | <3 | Yes | No  | No  |
| 410 | Female | ≥65 | ≥25 | kg/m2 | <3 | Yes | Yes | No  |
| 411 | Male   | <65 | <25 | kg/m2 | <3 | Yes | No  | No  |
| 412 | Female | <65 | <25 | kg/m2 | <3 | Yes | No  | No  |
| 413 | Female | ≥65 | ≥25 | kg/m2 | ≥3 | Yes | Yes | No  |
| 414 | Female | <65 | <25 | kg/m2 | <3 | No  | Yes | No  |
| 415 | Male   | <65 | <25 | kg/m2 | <3 | No  | No  | No  |
| 416 | Female | <65 | <25 | kg/m2 | ≥3 | No  | No  | No  |
| 417 | Female | ≥65 | ≥25 | kg/m2 | <3 | Yes | Yes | No  |
| 418 | Female | <65 | <25 | kg/m2 | ≥3 | Yes | No  | No  |
| 419 | Female | <65 | <25 | kg/m2 | <3 | Yes | No  | No  |
| 420 | Female | ≥65 | <25 | kg/m2 | <3 | Yes | No  | No  |
| 421 | Male   | <65 | <25 | kg/m2 | <3 | No  | Yes | Yes |
| 422 | Male   | <65 | <25 | kg/m2 | <3 | Yes | No  | Yes |
| 423 | Female | <65 | <25 | kg/m2 | ≥3 | Yes | Yes | Yes |
| 424 | Male   | <65 | <25 | kg/m2 | ≥3 | Yes | Yes | No  |
| 425 | Male   | <65 | <25 | kg/m2 | ≥3 | Yes | Yes | No  |
| 426 | Female | <65 | <25 | kg/m2 | ≥3 | Yes | Yes | No  |
| 427 | Male   | <65 | <25 | kg/m2 | ≥3 | No  | No  | No  |
| 428 | Female | <65 | <25 | kg/m2 | ≥3 | No  | No  | No  |
| 429 | Female | <65 | <25 | kg/m2 | <3 | Yes | No  | No  |
| 430 | Male   | <65 | <25 | kg/m2 | ≥3 | No  | No  | No  |



|            |     |     |       |    |     |     |     |
|------------|-----|-----|-------|----|-----|-----|-----|
| 431 Female | <65 | <25 | kg/m2 | <3 | Yes | Yes | No  |
| 432 Female | <65 | <25 | kg/m2 | <3 | Yes | No  | No  |
| 433 Female | <65 | <25 | kg/m2 | ≥3 | Yes | Yes | No  |
| 434 Male   | <65 | <25 | kg/m2 | ≥3 | No  | Yes | No  |
| 435 Male   | <65 | <25 | kg/m2 | ≥3 | Yes | No  | No  |
| 436 Female | <65 | <25 | kg/m2 | ≥3 | No  | Yes | No  |
| 437 Male   | <65 | <25 | kg/m2 | ≥3 | No  | No  | Yes |
| 438 Female | <65 | <25 | kg/m2 | ≥3 | No  | No  | No  |
| 439 Female | <65 | <25 | kg/m2 | <3 | Yes | Yes | No  |
| 440 Male   | <65 | <25 | kg/m2 | ≥3 | Yes | Yes | Yes |
| 441 Male   | ≥65 | ≥25 | kg/m2 | ≥3 | Yes | No  | Yes |
| 442 Female | ≥65 | ≥25 | kg/m2 | ≥3 | No  | Yes | No  |
| 443 Female | <65 | <25 | kg/m2 | <3 | Yes | Yes | No  |
| 444 Female | <65 | <25 | kg/m2 | <3 | No  | No  | No  |
| 445 Female | <65 | <25 | kg/m2 | <3 | Yes | No  | Yes |
| 446 Female | <65 | <25 | kg/m2 | <3 | No  | No  | Yes |
| 447 Female | <65 | <25 | kg/m2 | ≥3 | Yes | No  | Yes |
| 448 Female | <65 | <25 | kg/m2 | ≥3 | No  | No  | Yes |
| 449 Female | <65 | <25 | kg/m2 | ≥3 | Yes | No  | Yes |
| 450 Female | ≥65 | <25 | kg/m2 | <3 | Yes | Yes | No  |
| 451 Male   | ≥65 | <25 | kg/m2 | <3 | No  | Yes | No  |
| 452 Male   | <65 | <25 | kg/m2 | ≥3 | Yes | Yes | No  |
| 453 Female | ≥65 | <25 | kg/m2 | <3 | Yes | No  | No  |
| 454 Female | <65 | <25 | kg/m2 | ≥3 | No  | No  | No  |
| 455 Female | <65 | <25 | kg/m2 | <3 | No  | No  | Yes |
| 456 Female | <65 | <25 | kg/m2 | ≥3 | No  | Yes | No  |
| 457 Male   | ≥65 | ≥25 | kg/m2 | ≥3 | No  | No  | Yes |
| 458 Female | ≥65 | ≥25 | kg/m2 | ≥3 | Yes | No  | No  |
| 459 Female | <65 | <25 | kg/m2 | ≥3 | No  | Yes | No  |
| 460 Female | <65 | <25 | kg/m2 | ≥3 | Yes | No  | No  |
| 461 Female | <65 | <25 | kg/m2 | ≥3 | No  | No  | No  |
| 462 Female | <65 | <25 | kg/m2 | <3 | Yes | Yes | No  |
| 463 Female | <65 | <25 | kg/m2 | ≥3 | No  | Yes | No  |
| 464 Female | <65 | <25 | kg/m2 | ≥3 | Yes | Yes | No  |
| 465 Male   | <65 | <25 | kg/m2 | <3 | Yes | Yes | Yes |
| 466 Female | <65 | <25 | kg/m2 | <3 | No  | No  | No  |
| 467 Male   | <65 | ≥25 | kg/m2 | <3 | Yes | No  | Yes |
| 468 Female | <65 | <25 | kg/m2 | <3 | No  | Yes | No  |
| 469 Female | <65 | <25 | kg/m2 | ≥3 | No  | No  | No  |
| 470 Female | <65 | <25 | kg/m2 | ≥3 | Yes | No  | No  |
| 471 Female | <65 | <25 | kg/m2 | ≥3 | No  | No  | No  |
| 472 Male   | <65 | ≥25 | kg/m2 | ≥3 | No  | No  | No  |
| 473 Male   | <65 | <25 | kg/m2 | <3 | Yes | No  | No  |
| 474 Female | <65 | <25 | kg/m2 | ≥3 | Yes | Yes | No  |
| 475 Male   | <65 | <25 | kg/m2 | <3 | Yes | No  | No  |
| 476 Female | <65 | <25 | kg/m2 | <3 | No  | Yes | Yes |
| 477 Female | <65 | <25 | kg/m2 | ≥3 | Yes | No  | Yes |
| 478 Female | <65 | <25 | kg/m2 | <3 | Yes | Yes | No  |
| 479 Female | <65 | <25 | kg/m2 | <3 | No  | Yes | No  |
| 480 Female | <65 | <25 | kg/m2 | ≥3 | Yes | Yes | No  |
| 481 Female | <65 | <25 | kg/m2 | ≥3 | No  | No  | No  |
| 482 Female | <65 | <25 | kg/m2 | <3 | No  | No  | No  |
| 483 Female | <65 | <25 | kg/m2 | ≥3 | No  | No  | No  |
| 484 Female | <65 | <25 | kg/m2 | <3 | Yes | No  | No  |

|     |        |     |     |       |    |     |     |     |
|-----|--------|-----|-----|-------|----|-----|-----|-----|
| 485 | Male   | <65 | <25 | kg/m2 | <3 | Yes | No  | No  |
| 486 | Female | ≥65 | <25 | kg/m2 | <3 | No  | Yes | No  |
| 487 | Female | <65 | <25 | kg/m2 | ≥3 | Yes | No  | No  |
| 488 | Female | <65 | <25 | kg/m2 | <3 | Yes | No  | No  |
| 489 | Female | ≥65 | <25 | kg/m2 | <3 | No  | No  | No  |
| 490 | Female | <65 | <25 | kg/m2 | <3 | Yes | Yes | No  |
| 491 | Female | <65 | <25 | kg/m2 | ≥3 | Yes | Yes | No  |
| 492 | Female | <65 | <25 | kg/m2 | <3 | Yes | Yes | No  |
| 493 | Female | <65 | <25 | kg/m2 | ≥3 | No  | Yes | Yes |
| 494 | Female | <65 | <25 | kg/m2 | ≥3 | Yes | No  | Yes |
| 495 | Female | <65 | <25 | kg/m2 | ≥3 | No  | No  | Yes |
| 496 | Female | <65 | <25 | kg/m2 | ≥3 | Yes | No  | Yes |
| 497 | Female | <65 | <25 | kg/m2 | <3 | No  | Yes | No  |
| 498 | Female | <65 | <25 | kg/m2 | <3 | Yes | No  | No  |
| 499 | Female | <65 | <25 | kg/m2 | <3 | Yes | Yes | No  |
| 500 | Female | <65 | <25 | kg/m2 | ≥3 | No  | No  | Yes |
| 501 | Female | <65 | <25 | kg/m2 | <3 | No  | No  | Yes |
| 502 | Female | <65 | <25 | kg/m2 | <3 | Yes | No  | No  |
| 503 | Female | <65 | <25 | kg/m2 | <3 | Yes | Yes | No  |
| 504 | Female | <65 | <25 | kg/m2 | ≥3 | Yes | Yes | No  |
| 505 | Female | <65 | <25 | kg/m2 | <3 | Yes | Yes | No  |
| 506 | Female | <65 | <25 | kg/m2 | ≥3 | Yes | Yes | No  |
| 507 | Female | <65 | <25 | kg/m2 | ≥3 | No  | Yes | No  |
| 508 | Female | <65 | <25 | kg/m2 | <3 | Yes | Yes | No  |
| 509 | Female | <65 | <25 | kg/m2 | ≥3 | No  | No  | No  |
| 510 | Female | <65 | <25 | kg/m2 | ≥3 | No  | Yes | No  |
| 511 | Female | <65 | <25 | kg/m2 | ≥3 | No  | No  | No  |
| 512 | Female | ≥65 | ≥25 | kg/m2 | ≥3 | Yes | Yes | Yes |
| 513 | Female | <65 | <25 | kg/m2 | ≥3 | No  | No  | Yes |
| 514 | Female | ≥65 | ≥25 | kg/m2 | <3 | No  | No  | Yes |
| 515 | Female | <65 | <25 | kg/m2 | <3 | No  | No  | Yes |
| 516 | Female | <65 | <25 | kg/m2 | <3 | No  | No  | No  |
| 517 | Female | ≥65 | ≥25 | kg/m2 | <3 | No  | Yes | Yes |
| 518 | Female | ≥65 | ≥25 | kg/m2 | <3 | No  | No  | Yes |
| 519 | Female | <65 | <25 | kg/m2 | <3 | No  | No  | Yes |
| 520 | Female | <65 | <25 | kg/m2 | ≥3 | Yes | Yes | Yes |
| 521 | Female | <65 | <25 | kg/m2 | <3 | No  | Yes | No  |
| 522 | Female | <65 | <25 | kg/m2 | <3 | No  | Yes | No  |
| 523 | Female | <65 | <25 | kg/m2 | <3 | Yes | Yes | No  |
| 524 | Female | <65 | <25 | kg/m2 | <3 | Yes | Yes | No  |
| 525 | Female | <65 | <25 | kg/m2 | ≥3 | Yes | Yes | No  |
| 526 | Female | <65 | <25 | kg/m2 | <3 | No  | No  | No  |
| 527 | Female | <65 | <25 | kg/m2 | ≥3 | Yes | No  | No  |
| 528 | Female | <65 | <25 | kg/m2 | <3 | No  | Yes | No  |
| 529 | Female | <65 | <25 | kg/m2 | ≥3 | Yes | Yes | No  |
| 530 | Female | <65 | <25 | kg/m2 | ≥3 | Yes | Yes | No  |
| 531 | Female | ≥65 | ≥25 | kg/m2 | ≥3 | Yes | Yes | No  |
| 532 | Female | ≥65 | ≥25 | kg/m2 | ≥3 | Yes | Yes | No  |
| 533 | Female | <65 | <25 | kg/m2 | ≥3 | No  | No  | No  |
| 534 | Female | ≥65 | <25 | kg/m2 | <3 | No  | Yes | No  |
| 535 | Male   | ≥65 | <25 | kg/m2 | ≥3 | Yes | No  | Yes |
| 536 | Female | <65 | <25 | kg/m2 | ≥3 | No  | Yes | No  |
| 537 | Male   | <65 | <25 | kg/m2 | <3 | No  | Yes | Yes |
| 538 | Male   | <65 | <25 | kg/m2 | ≥3 | Yes | No  | Yes |

|     |        |     |     |                   |    |     |     |     |
|-----|--------|-----|-----|-------------------|----|-----|-----|-----|
| 539 | Female | <65 | <25 | kg/m <sup>2</sup> | ≥3 | No  | Yes | No  |
| 540 | Male   | <65 | <25 | kg/m <sup>2</sup> | <3 | Yes | Yes | Yes |
| 541 | Female | <65 | <25 | kg/m <sup>2</sup> | <3 | No  | No  | No  |
| 542 | Male   | <65 | <25 | kg/m <sup>2</sup> | ≥3 | No  | No  | No  |
| 543 | Male   | <65 | <25 | kg/m <sup>2</sup> | ≥3 | Yes | Yes | No  |
| 544 | Male   | <65 | <25 | kg/m <sup>2</sup> | <3 | Yes | Yes | No  |
| 545 | Male   | <65 | <25 | kg/m <sup>2</sup> | ≥3 | Yes | Yes | No  |
| 546 | Male   | <65 | <25 | kg/m <sup>2</sup> | <3 | Yes | Yes | No  |
| 547 | Male   | <65 | <25 | kg/m <sup>2</sup> | ≥3 | No  | No  | No  |
| 548 | Female | <65 | <25 | kg/m <sup>2</sup> | ≥3 | No  | Yes | No  |
| 549 | Female | <65 | <25 | kg/m <sup>2</sup> | ≥3 | No  | Yes | No  |
| 550 | Female | <65 | <25 | kg/m <sup>2</sup> | ≥3 | No  | No  | No  |
| 551 | Male   | <65 | <25 | kg/m <sup>2</sup> | <3 | No  | No  | Yes |
| 552 | Male   | <65 | <25 | kg/m <sup>2</sup> | ≥3 | No  | No  | Yes |
| 553 | Female | <65 | <25 | kg/m <sup>2</sup> | ≥3 | No  | Yes | No  |
| 554 | Male   | <65 | <25 | kg/m <sup>2</sup> | <3 | No  | Yes | No  |
| 555 | Male   | <65 | <25 | kg/m <sup>2</sup> | <3 | No  | Yes | No  |
| 556 | Female | <65 | <25 | kg/m <sup>2</sup> | <3 | No  | Yes | No  |
| 557 | Male   | <65 | <25 | kg/m <sup>2</sup> | ≥3 | No  | No  | No  |
| 558 | Female | <65 | <25 | kg/m <sup>2</sup> | <3 | No  | No  | No  |
| 559 | Female | <65 | <25 | kg/m <sup>2</sup> | <3 | Yes | No  | No  |
| 560 | Female | <65 | <25 | kg/m <sup>2</sup> | ≥3 | No  | Yes | No  |
| 561 | Male   | <65 | <25 | kg/m <sup>2</sup> | <3 | Yes | No  | Yes |
| 562 | Male   | <65 | <25 | kg/m <sup>2</sup> | ≥3 | Yes | No  | No  |
| 563 | Female | <65 | <25 | kg/m <sup>2</sup> | <3 | No  | No  | No  |
| 564 | Male   | <65 | <25 | kg/m <sup>2</sup> | <3 | No  | No  | No  |
| 565 | Female | ≥65 | ≥25 | kg/m <sup>2</sup> | ≥3 | Yes | Yes | No  |
| 566 | Female | <65 | <25 | kg/m <sup>2</sup> | <3 | No  | Yes | No  |
| 567 | Male   | ≥65 | ≥25 | kg/m <sup>2</sup> | <3 | No  | No  | No  |
| 568 | Male   | <65 | <25 | kg/m <sup>2</sup> | ≥3 | No  | No  | No  |
| 569 | Female | <65 | <25 | kg/m <sup>2</sup> | <3 | Yes | Yes | No  |
| 570 | Female | <65 | <25 | kg/m <sup>2</sup> | ≥3 | Yes | No  | No  |
| 571 | Female | <65 | <25 | kg/m <sup>2</sup> | <3 | Yes | No  | No  |
| 572 | Female | <65 | <25 | kg/m <sup>2</sup> | ≥3 | Yes | No  | No  |
| 573 | Female | <65 | <25 | kg/m <sup>2</sup> | ≥3 | No  | No  | No  |
| 574 | Female | <65 | <25 | kg/m <sup>2</sup> | ≥3 | Yes | No  | No  |
| 575 | Male   | <65 | <25 | kg/m <sup>2</sup> | ≥3 | Yes | No  | No  |
| 576 | Male   | <65 | <25 | kg/m <sup>2</sup> | ≥3 | No  | Yes | No  |
| 577 | Female | <65 | <25 | kg/m <sup>2</sup> | ≥3 | No  | No  | No  |
| 578 | Female | <65 | <25 | kg/m <sup>2</sup> | ≥3 | No  | No  | Yes |
| 579 | Female | <65 | <25 | kg/m <sup>2</sup> | <3 | Yes | Yes | No  |
| 580 | Female | <65 | <25 | kg/m <sup>2</sup> | <3 | No  | Yes | Yes |
| 581 | Female | <65 | <25 | kg/m <sup>2</sup> | ≥3 | No  | No  | No  |
| 582 | Male   | ≥65 | ≥25 | kg/m <sup>2</sup> | ≥3 | Yes | Yes | No  |
| 583 | Male   | <65 | <25 | kg/m <sup>2</sup> | <3 | No  | Yes | No  |
| 584 | Female | <65 | <25 | kg/m <sup>2</sup> | ≥3 | Yes | No  | No  |
| 585 | Male   | <65 | <25 | kg/m <sup>2</sup> | <3 | Yes | Yes | Yes |
| 586 | Male   | <65 | <25 | kg/m <sup>2</sup> | ≥3 | Yes | No  | Yes |
| 587 | Female | <65 | <25 | kg/m <sup>2</sup> | <3 | No  | Yes | Yes |
| 588 | Male   | <65 | <25 | kg/m <sup>2</sup> | <3 | No  | Yes | No  |
| 589 | Female | <65 | <25 | kg/m <sup>2</sup> | <3 | Yes | Yes | No  |
| 590 | Female | <65 | <25 | kg/m <sup>2</sup> | ≥3 | Yes | No  | No  |
| 591 | Female | <65 | <25 | kg/m <sup>2</sup> | <3 | No  | No  | No  |
| 592 | Male   | <65 | <25 | kg/m <sup>2</sup> | ≥3 | Yes | No  | No  |

|            |     |     |       |    |     |     |     |
|------------|-----|-----|-------|----|-----|-----|-----|
| 593 Male   | <65 | <25 | kg/m2 | <3 | No  | Yes | No  |
| 594 Female | <65 | <25 | kg/m2 | <3 | No  | No  | No  |
| 595 Male   | <65 | <25 | kg/m2 | <3 | Yes | Yes | No  |
| 596 Female | <65 | <25 | kg/m2 | ≥3 | Yes | Yes | No  |
| 597 Female | <65 | <25 | kg/m2 | ≥3 | No  | Yes | No  |
| 598 Male   | <65 | <25 | kg/m2 | <3 | Yes | Yes | No  |
| 599 Male   | <65 | <25 | kg/m2 | <3 | No  | Yes | No  |
| 600 Female | <65 | <25 | kg/m2 | <3 | Yes | No  | Yes |
| 601 Female | <65 | <25 | kg/m2 | ≥3 | No  | Yes | No  |
| 602 Female | <65 | <25 | kg/m2 | <3 | No  | No  | Yes |
| 603 Female | <65 | <25 | kg/m2 | <3 | Yes | No  | No  |
| 604 Female | <65 | <25 | kg/m2 | <3 | No  | No  | No  |
| 605 Female | <65 | <25 | kg/m2 | <3 | Yes | No  | No  |
| 606 Male   | <65 | <25 | kg/m2 | ≥3 | No  | No  | No  |
| 607 Male   | <65 | <25 | kg/m2 | <3 | No  | Yes | Yes |
| 608 Female | <65 | <25 | kg/m2 | ≥3 | Yes | No  | No  |
| 609 Female | <65 | <25 | kg/m2 | ≥3 | Yes | No  | No  |
| 610 Female | <65 | <25 | kg/m2 | <3 | Yes | Yes | No  |
| 611 Female | <65 | <25 | kg/m2 | <3 | Yes | No  | No  |
| 612 Female | <65 | <25 | kg/m2 | ≥3 | Yes | Yes | No  |
| 613 Male   | <65 | <25 | kg/m2 | ≥3 | Yes | Yes | No  |
| 614 Male   | <65 | <25 | kg/m2 | ≥3 | No  | Yes | No  |
| 615 Female | <65 | <25 | kg/m2 | ≥3 | No  | Yes | No  |
| 616 Male   | <65 | <25 | kg/m2 | ≥3 | Yes | No  | Yes |
| 617 Male   | <65 | <25 | kg/m2 | ≥3 | Yes | Yes | Yes |
| 618 Female | <65 | <25 | kg/m2 | <3 | Yes | Yes | No  |
| 619 Male   | <65 | <25 | kg/m2 | <3 | Yes | Yes | No  |
| 620 Female | <65 | <25 | kg/m2 | ≥3 | Yes | Yes | No  |
| 621 Female | <65 | <25 | kg/m2 | ≥3 | No  | No  | No  |
| 622 Female | <65 | <25 | kg/m2 | <3 | No  | No  | No  |
| 623 Male   | <65 | <25 | kg/m2 | ≥3 | Yes | No  | No  |
| 624 Male   | <65 | <25 | kg/m2 | ≥3 | Yes | Yes | No  |
| 625 Female | <65 | <25 | kg/m2 | <3 | No  | Yes | No  |
| 626 Female | <65 | <25 | kg/m2 | <3 | Yes | Yes | No  |
| 627 Female | <65 | <25 | kg/m2 | <3 | No  | No  | Yes |
| 628 Female | <65 | <25 | kg/m2 | ≥3 | Yes | No  | No  |
| 629 Female | <65 | <25 | kg/m2 | <3 | No  | Yes | Yes |
| 630 Female | <65 | <25 | kg/m2 | ≥3 | No  | No  | No  |
| 631 Female | <65 | <25 | kg/m2 | ≥3 | Yes | No  | No  |
| 632 Female | <65 | <25 | kg/m2 | ≥3 | No  | Yes | No  |
| 633 Female | <65 | <25 | kg/m2 | ≥3 | No  | Yes | No  |
| 634 Female | <65 | <25 | kg/m2 | <3 | Yes | Yes | Yes |
| 635 Female | <65 | <25 | kg/m2 | <3 | No  | Yes | Yes |
| 636 Female | <65 | <25 | kg/m2 | ≥3 | Yes | Yes | Yes |
| 637 Male   | <65 | <25 | kg/m2 | ≥3 | Yes | Yes | No  |
| 638 Male   | <65 | <25 | kg/m2 | <3 | Yes | No  | No  |
| 639 Female | <65 | <25 | kg/m2 | <3 | No  | Yes | No  |
| 640 Female | <65 | <25 | kg/m2 | ≥3 | Yes | No  | No  |
| 641 Female | <65 | <25 | kg/m2 | <3 | Yes | Yes | No  |
| 642 Female | <65 | <25 | kg/m2 | ≥3 | Yes | Yes | No  |
| 643 Female | <65 | <25 | kg/m2 | <3 | No  | No  | No  |
| 644 Female | <65 | <25 | kg/m2 | ≥3 | No  | Yes | No  |
| 645 Male   | <65 | <25 | kg/m2 | ≥3 | No  | Yes | No  |
| 646 Female | <65 | <25 | kg/m2 | ≥3 | Yes | Yes | No  |

|     |        |     |     |       |    |     |     |     |
|-----|--------|-----|-----|-------|----|-----|-----|-----|
| 647 | Female | <65 | <25 | kg/m2 | <3 | No  | Yes | No  |
| 648 | Female | <65 | <25 | kg/m2 | ≥3 | No  | Yes | No  |
| 649 | Female | <65 | <25 | kg/m2 | <3 | Yes | Yes | No  |
| 650 | Female | <65 | <25 | kg/m2 | <3 | Yes | No  | No  |
| 651 | Male   | <65 | <25 | kg/m2 | ≥3 | No  | Yes | Yes |
| 652 | Female | <65 | <25 | kg/m2 | ≥3 | No  | No  | No  |
| 653 | Female | <65 | <25 | kg/m2 | ≥3 | Yes | No  | No  |
| 654 | Female | <65 | <25 | kg/m2 | ≥3 | No  | Yes | No  |
| 655 | Female | <65 | <25 | kg/m2 | ≥3 | Yes | No  | No  |
| 656 | Female | <65 | <25 | kg/m2 | <3 | Yes | Yes | No  |
| 657 | Male   | <65 | <25 | kg/m2 | <3 | Yes | No  | No  |
| 658 | Female | <65 | <25 | kg/m2 | <3 | No  | No  | Yes |
| 659 | Male   | <65 | <25 | kg/m2 | ≥3 | Yes | Yes | No  |
| 660 | Female | <65 | <25 | kg/m2 | <3 | No  | Yes | No  |
| 661 | Male   | <65 | <25 | kg/m2 | ≥3 | No  | No  | No  |
| 662 | Male   | <65 | <25 | kg/m2 | ≥3 | Yes | No  | No  |
| 663 | Female | ≥65 | ≥25 | kg/m2 | ≥3 | Yes | Yes | No  |
| 664 | Female | <65 | <25 | kg/m2 | ≥3 | Yes | Yes | No  |
| 665 | Female | <65 | <25 | kg/m2 | ≥3 | No  | Yes | No  |
| 666 | Female | ≥65 | ≥25 | kg/m2 | ≥3 | Yes | Yes | No  |
| 667 | Male   | <65 | <25 | kg/m2 | ≥3 | Yes | Yes | Yes |
| 668 | Female | <65 | <25 | kg/m2 | <3 | Yes | No  | No  |
| 669 | Male   | <65 | <25 | kg/m2 | <3 | Yes | No  | Yes |
| 670 | Female | <65 | <25 | kg/m2 | <3 | Yes | Yes | No  |
| 671 | Male   | <65 | <25 | kg/m2 | ≥3 | Yes | No  | No  |
| 672 | Female | <65 | <25 | kg/m2 | <3 | Yes | No  | No  |
| 673 | Female | ≥65 | ≥25 | kg/m2 | <3 | Yes | No  | No  |
| 674 | Male   | <65 | <25 | kg/m2 | <3 | No  | No  | Yes |
| 675 | Female | <65 | <25 | kg/m2 | ≥3 | Yes | Yes | Yes |
| 676 | Female | ≥65 | ≥25 | kg/m2 | <3 | No  | Yes | No  |
| 677 | Female | ≥65 | ≥25 | kg/m2 | <3 | No  | No  | No  |
| 678 | Female | <65 | <25 | kg/m2 | ≥3 | No  | Yes | No  |
| 679 | Female | <65 | <25 | kg/m2 | ≥3 | No  | Yes | No  |
| 680 | Male   | <65 | <25 | kg/m2 | ≥3 | No  | Yes | No  |
| 681 | Male   | <65 | <25 | kg/m2 | <3 | Yes | No  | No  |
| 682 | Male   | <65 | <25 | kg/m2 | <3 | No  | Yes | No  |
| 683 | Female | <65 | <25 | kg/m2 | ≥3 | Yes | Yes | No  |
| 684 | Female | <65 | <25 | kg/m2 | <3 | No  | No  | No  |
| 685 | Female | <65 | <25 | kg/m2 | <3 | Yes | Yes | No  |
| 686 | Female | <65 | <25 | kg/m2 | <3 | Yes | No  | No  |
| 687 | Male   | <65 | <25 | kg/m2 | ≥3 | No  | Yes | No  |
| 688 | Female | <65 | <25 | kg/m2 | <3 | No  | No  | No  |
| 689 | Female | <65 | <25 | kg/m2 | ≥3 | Yes | No  | No  |
| 690 | Female | <65 | <25 | kg/m2 | <3 | Yes | Yes | No  |
| 691 | Male   | <65 | <25 | kg/m2 | ≥3 | Yes | Yes | Yes |
| 692 | Male   | ≥65 | ≥25 | kg/m2 | <3 | Yes | Yes | Yes |
| 693 | Male   | ≥65 | <25 | kg/m2 | ≥3 | Yes | No  | Yes |
| 694 | Female | <65 | <25 | kg/m2 | <3 | Yes | Yes | No  |
| 695 | Female | ≥65 | <25 | kg/m2 | <3 | No  | No  | No  |
| 696 | Female | <65 | <25 | kg/m2 | <3 | No  | No  | No  |
| 697 | Female | <65 | <25 | kg/m2 | <3 | No  | No  | No  |
| 698 | Male   | <65 | <25 | kg/m2 | ≥3 | No  | Yes | No  |
| 699 | Male   | <65 | <25 | kg/m2 | <3 | Yes | No  | No  |
| 700 | Male   | <65 | <25 | kg/m2 | <3 | Yes | No  | No  |

|            |     |     |       |    |     |     |     |
|------------|-----|-----|-------|----|-----|-----|-----|
| 701 Female | <65 | <25 | kg/m2 | ≥3 | No  | Yes | No  |
| 702 Female | <65 | <25 | kg/m2 | <3 | Yes | No  | No  |
| 703 Female | <65 | <25 | kg/m2 | ≥3 | Yes | Yes | No  |
| 704 Female | <65 | <25 | kg/m2 | ≥3 | Yes | Yes | No  |
| 705 Female | ≥65 | ≥25 | kg/m2 | ≥3 | Yes | No  | No  |
| 706 Male   | ≥65 | ≥25 | kg/m2 | ≥3 | Yes | Yes | No  |
| 707 Female | <65 | <25 | kg/m2 | ≥3 | Yes | No  | No  |
| 708 Male   | <65 | <25 | kg/m2 | <3 | No  | No  | Yes |
| 709 Female | <65 | <25 | kg/m2 | <3 | No  | No  | No  |
| 710 Male   | <65 | <25 | kg/m2 | ≥3 | Yes | No  | No  |
| 711 Female | <65 | <25 | kg/m2 | <3 | Yes | Yes | No  |
| 712 Female | ≥65 | ≥25 | kg/m2 | <3 | Yes | No  | No  |
| 713 Male   | <65 | <25 | kg/m2 | ≥3 | No  | Yes | No  |
| 714 Female | ≥65 | ≥25 | kg/m2 | <3 | Yes | Yes | No  |
| 715 Female | <65 | <25 | kg/m2 | ≥3 | No  | No  | No  |
| 716 Female | <65 | <25 | kg/m2 | ≥3 | No  | No  | No  |
| 717 Female | <65 | <25 | kg/m2 | <3 | No  | No  | Yes |
| 718 Female | <65 | <25 | kg/m2 | ≥3 | Yes | Yes | No  |
| 719 Female | <65 | <25 | kg/m2 | <3 | Yes | No  | Yes |
| 720 Female | <65 | <25 | kg/m2 | <3 | Yes | No  | No  |
| 721 Female | <65 | <25 | kg/m2 | ≥3 | Yes | Yes | No  |
| 722 Male   | <65 | <25 | kg/m2 | ≥3 | No  | No  | No  |
| 723 Male   | ≥65 | <25 | kg/m2 | ≥3 | No  | No  | No  |
| 724 Male   | ≥65 | <25 | kg/m2 | <3 | No  | Yes | Yes |
| 725 Female | <65 | <25 | kg/m2 | ≥3 | No  | No  | Yes |
| 726 Female | <65 | <25 | kg/m2 | ≥3 | Yes | Yes | Yes |
| 727 Female | <65 | <25 | kg/m2 | ≥3 | No  | No  | No  |
| 728 Female | <65 | <25 | kg/m2 | ≥3 | No  | Yes | No  |
| 729 Male   | <65 | <25 | kg/m2 | ≥3 | Yes | Yes | No  |
| 730 Female | <65 | <25 | kg/m2 | ≥3 | No  | No  | No  |
| 731 Female | <65 | <25 | kg/m2 | <3 | Yes | Yes | No  |
| 732 Female | <65 | <25 | kg/m2 | ≥3 | Yes | No  | No  |
| 733 Male   | <65 | ≥25 | kg/m2 | ≥3 | Yes | Yes | No  |
| 734 Male   | <65 | ≥25 | kg/m2 | ≥3 | No  | No  | No  |
| 735 Male   | <65 | <25 | kg/m2 | ≥3 | No  | No  | Yes |
| 736 Female | ≥65 | ≥25 | kg/m2 | <3 | Yes | Yes | No  |
| 737 Female | <65 | <25 | kg/m2 | <3 | Yes | No  | No  |
| 738 Female | <65 | <25 | kg/m2 | ≥3 | Yes | No  | No  |
| 739 Female | <65 | <25 | kg/m2 | <3 | No  | No  | No  |
| 740 Male   | <65 | <25 | kg/m2 | <3 | No  | No  | No  |
| 741 Male   | <65 | <25 | kg/m2 | ≥3 | Yes | No  | No  |
| 742 Male   | <65 | <25 | kg/m2 | <3 | Yes | No  | No  |
| 743 Female | <65 | <25 | kg/m2 | <3 | No  | Yes | No  |
| 744 Female | <65 | <25 | kg/m2 | <3 | Yes | No  | No  |
| 745 Female | <65 | <25 | kg/m2 | <3 | Yes | No  | No  |
| 746 Female | <65 | <25 | kg/m2 | ≥3 | No  | No  | No  |
| 747 Female | <65 | <25 | kg/m2 | ≥3 | No  | No  | No  |
| 748 Male   | <65 | <25 | kg/m2 | ≥3 | No  | No  | Yes |
| 749 Male   | <65 | <25 | kg/m2 | ≥3 | Yes | Yes | No  |
| 750 Male   | <65 | <25 | kg/m2 | <3 | No  | No  | No  |
| 751 Female | <65 | <25 | kg/m2 | ≥3 | No  | No  | No  |
| 752 Female | <65 | <25 | kg/m2 | ≥3 | No  | Yes | No  |
| 753 Female | <65 | <25 | kg/m2 | ≥3 | No  | No  | No  |
| 754 Female | <65 | <25 | kg/m2 | ≥3 | Yes | Yes | No  |

|            |     |     |       |    |     |     |     |
|------------|-----|-----|-------|----|-----|-----|-----|
| 755 Male   | <65 | <25 | kg/m2 | ≥3 | Yes | Yes | No  |
| 756 Female | <65 | <25 | kg/m2 | ≥3 | No  | Yes | No  |
| 757 Female | ≥65 | ≥25 | kg/m2 | ≥3 | No  | Yes | Yes |
| 758 Female | <65 | <25 | kg/m2 | <3 | Yes | Yes | No  |
| 759 Male   | ≥65 | ≥25 | kg/m2 | <3 | Yes | No  | Yes |
| 760 Male   | <65 | <25 | kg/m2 | <3 | Yes | No  | No  |
| 761 Male   | <65 | <25 | kg/m2 | ≥3 | No  | Yes | No  |
| 762 Female | <65 | <25 | kg/m2 | <3 | Yes | Yes | No  |
| 763 Female | <65 | <25 | kg/m2 | <3 | Yes | No  | No  |
| 764 Female | <65 | <25 | kg/m2 | <3 | Yes | No  | Yes |
| 765 Female | <65 | <25 | kg/m2 | ≥3 | Yes | No  | Yes |
| 766 Male   | <65 | <25 | kg/m2 | <3 | Yes | Yes | No  |
| 767 Male   | <65 | <25 | kg/m2 | <3 | No  | Yes | No  |
| 768 Male   | ≥65 | ≥25 | kg/m2 | <3 | Yes | Yes | No  |
| 769 Female | ≥65 | ≥25 | kg/m2 | <3 | Yes | No  | No  |
| 770 Female | <65 | <25 | kg/m2 | <3 | No  | No  | No  |
| 771 Female | <65 | <25 | kg/m2 | <3 | Yes | No  | No  |
| 772 Female | <65 | <25 | kg/m2 | ≥3 | No  | Yes | No  |
| 773 Female | <65 | <25 | kg/m2 | ≥3 | Yes | Yes | No  |
| 774 Female | <65 | <25 | kg/m2 | <3 | No  | No  | No  |
| 775 Female | <65 | <25 | kg/m2 | ≥3 | Yes | Yes | No  |
| 776 Female | <65 | <25 | kg/m2 | <3 | Yes | No  | No  |
| 777 Female | <65 | <25 | kg/m2 | ≥3 | No  | Yes | No  |
| 778 Male   | ≥65 | ≥25 | kg/m2 | ≥3 | No  | No  | No  |
| 779 Male   | ≥65 | ≥25 | kg/m2 | <3 | No  | Yes | No  |
| 780 Male   | <65 | <25 | kg/m2 | ≥3 | Yes | No  | Yes |
| 781 Female | ≥65 | ≥25 | kg/m2 | ≥3 | No  | No  | No  |
| 782 Female | <65 | <25 | kg/m2 | <3 | No  | Yes | Yes |
| 783 Female | <65 | <25 | kg/m2 | <3 | Yes | Yes | No  |
| 784 Female | <65 | <25 | kg/m2 | <3 | No  | Yes | No  |
| 785 Male   | <65 | <25 | kg/m2 | <3 | Yes | No  | No  |
| 786 Female | <65 | <25 | kg/m2 | ≥3 | No  | Yes | No  |
| 787 Female | <65 | <25 | kg/m2 | <3 | Yes | No  | Yes |
| 788 Female | <65 | <25 | kg/m2 | <3 | No  | No  | Yes |
| 789 Male   | <65 | <25 | kg/m2 | ≥3 | No  | No  | Yes |
| 790 Male   | <65 | <25 | kg/m2 | <3 | No  | No  | No  |
| 791 Male   | <65 | <25 | kg/m2 | ≥3 | Yes | Yes | No  |
| 792 Female | <65 | <25 | kg/m2 | <3 | Yes | Yes | No  |
| 793 Female | <65 | <25 | kg/m2 | ≥3 | Yes | Yes | No  |
| 794 Female | ≥65 | ≥25 | kg/m2 | ≥3 | Yes | Yes | No  |
| 795 Female | ≥65 | <25 | kg/m2 | ≥3 | No  | Yes | No  |
| 796 Male   | <65 | <25 | kg/m2 | ≥3 | Yes | Yes | No  |
| 797 Male   | ≥65 | <25 | kg/m2 | ≥3 | Yes | No  | No  |
| 798 Male   | ≥65 | <25 | kg/m2 | <3 | No  | No  | No  |
| 799 Female | <65 | <25 | kg/m2 | <3 | No  | Yes | No  |
| 800 Female | ≥65 | <25 | kg/m2 | <3 | No  | Yes | No  |
| 801 Female | <65 | <25 | kg/m2 | ≥3 | Yes | Yes | No  |
| 802 Female | <65 | <25 | kg/m2 | ≥3 | No  | No  | No  |
| 803 Male   | <65 | <25 | kg/m2 | <3 | Yes | Yes | Yes |
| 804 Female | ≥65 | ≥25 | kg/m2 | <3 | No  | Yes | No  |
| 805 Male   | ≥65 | ≥25 | kg/m2 | ≥3 | Yes | Yes | Yes |
| 806 Female | <65 | <25 | kg/m2 | <3 | Yes | No  | No  |
| 807 Female | ≥65 | ≥25 | kg/m2 | ≥3 | Yes | Yes | No  |
| 808 Female | <65 | <25 | kg/m2 | <3 | Yes | No  | No  |

|            |     |     |       |    |     |     |     |
|------------|-----|-----|-------|----|-----|-----|-----|
| 809 Female | <65 | <25 | kg/m2 | <3 | Yes | Yes | No  |
| 810 Female | ≥65 | ≥25 | kg/m2 | <3 | No  | No  | Yes |
| 811 Male   | ≥65 | ≥25 | kg/m2 | ≥3 | Yes | Yes | Yes |
| 812 Male   | <65 | <25 | kg/m2 | <3 | No  | Yes | Yes |
| 813 Female | ≥65 | ≥25 | kg/m2 | <3 | No  | No  | No  |
| 814 Male   | ≥65 | ≥25 | kg/m2 | <3 | No  | Yes | No  |
| 815 Female | <65 | <25 | kg/m2 | <3 | Yes | Yes | No  |
| 816 Female | <65 | <25 | kg/m2 | ≥3 | Yes | No  | No  |
| 817 Male   | <65 | <25 | kg/m2 | <3 | Yes | No  | Yes |
| 818 Female | <65 | <25 | kg/m2 | ≥3 | Yes | No  | No  |
| 819 Male   | <65 | <25 | kg/m2 | <3 | No  | No  | Yes |
| 820 Female | <65 | <25 | kg/m2 | ≥3 | Yes | Yes | No  |
| 821 Female | <65 | <25 | kg/m2 | ≥3 | Yes | Yes | No  |
| 822 Female | <65 | <25 | kg/m2 | <3 | No  | Yes | No  |
| 823 Female | <65 | <25 | kg/m2 | ≥3 | No  | Yes | No  |
| 824 Female | <65 | <25 | kg/m2 | <3 | Yes | Yes | No  |
| 825 Male   | <65 | <25 | kg/m2 | <3 | Yes | Yes | No  |
| 826 Male   | ≥65 | ≥25 | kg/m2 | ≥3 | Yes | No  | No  |
| 827 Female | ≥65 | ≥25 | kg/m2 | ≥3 | Yes | Yes | No  |
| 828 Male   | <65 | <25 | kg/m2 | ≥3 | Yes | No  | No  |
| 829 Female | <65 | <25 | kg/m2 | <3 | No  | No  | No  |
| 830 Female | <65 | <25 | kg/m2 | <3 | Yes | No  | No  |
| 831 Male   | <65 | <25 | kg/m2 | ≥3 | Yes | Yes | No  |
| 832 Male   | ≥65 | ≥25 | kg/m2 | ≥3 | Yes | No  | No  |
| 833 Male   | <65 | <25 | kg/m2 | ≥3 | No  | Yes | Yes |
| 834 Female | <65 | <25 | kg/m2 | ≥3 | No  | No  | No  |
| 835 Female | <65 | <25 | kg/m2 | ≥3 | Yes | No  | Yes |
| 836 Female | ≥65 | ≥25 | kg/m2 | ≥3 | No  | No  | No  |
| 837 Female | ≥65 | ≥25 | kg/m2 | <3 | No  | No  | No  |
| 838 Male   | <65 | <25 | kg/m2 | ≥3 | No  | No  | No  |
| 839 Female | <65 | <25 | kg/m2 | <3 | No  | No  | No  |
| 840 Female | <65 | <25 | kg/m2 | <3 | No  | Yes | Yes |
| 841 Male   | <65 | <25 | kg/m2 | ≥3 | Yes | No  | No  |
| 842 Male   | <65 | <25 | kg/m2 | ≥3 | No  | Yes | No  |
| 843 Male   | <65 | <25 | kg/m2 | ≥3 | Yes | Yes | No  |
| 844 Male   | <65 | <25 | kg/m2 | ≥3 | Yes | No  | No  |
| 845 Male   | <65 | <25 | kg/m2 | <3 | Yes | No  | No  |
| 846 Male   | ≥65 | <25 | kg/m2 | ≥3 | No  | No  | No  |
| 847 Male   | <65 | <25 | kg/m2 | ≥3 | Yes | No  | Yes |
| 848 Female | <65 | <25 | kg/m2 | <3 | Yes | Yes | No  |
| 849 Female | <65 | <25 | kg/m2 | ≥3 | Yes | Yes | No  |
| 850 Female | ≥65 | <25 | kg/m2 | ≥3 | No  | No  | No  |
| 851 Male   | <65 | <25 | kg/m2 | ≥3 | Yes | Yes | Yes |
| 852 Male   | ≥65 | <25 | kg/m2 | ≥3 | No  | No  | Yes |
| 853 Male   | ≥65 | ≥25 | kg/m2 | ≥3 | Yes | No  | No  |
| 854 Female | ≥65 | <25 | kg/m2 | ≥3 | Yes | Yes | No  |
| 855 Female | <65 | <25 | kg/m2 | ≥3 | Yes | Yes | Yes |
| 856 Female | <65 | <25 | kg/m2 | <3 | Yes | No  | No  |
| 857 Female | <65 | <25 | kg/m2 | <3 | Yes | No  | Yes |
| 858 Male   | ≥65 | <25 | kg/m2 | <3 | No  | No  | Yes |
| 859 Female | <65 | <25 | kg/m2 | ≥3 | Yes | Yes | Yes |
| 860 Female | <65 | ≥25 | kg/m2 | <3 | No  | Yes | No  |
| 861 Female | ≥65 | <25 | kg/m2 | <3 | No  | No  | No  |
| 862 Female | <65 | <25 | kg/m2 | ≥3 | No  | Yes | Yes |



|            |     |     |       |    |     |     |     |
|------------|-----|-----|-------|----|-----|-----|-----|
| 863 Female | ≥65 | ≥25 | kg/m2 | ≥3 | No  | Yes | Yes |
| 864 Male   | ≥65 | ≥25 | kg/m2 | ≥3 | No  | Yes | Yes |
| 865 Male   | <65 | ≥25 | kg/m2 | <3 | Yes | No  | Yes |
| 866 Male   | <65 | <25 | kg/m2 | <3 | No  | Yes | No  |
| 867 Female | ≥65 | <25 | kg/m2 | ≥3 | Yes | Yes | No  |
| 868 Female | <65 | <25 | kg/m2 | <3 | No  | No  | Yes |
| 869 Female | <65 | <25 | kg/m2 | <3 | Yes | Yes | No  |
| 870 Female | <65 | ≥25 | kg/m2 | <3 | Yes | No  | Yes |
| 871 Male   | <65 | <25 | kg/m2 | ≥3 | No  | Yes | Yes |
| 872 Female | <65 | <25 | kg/m2 | <3 | No  | No  | Yes |
| 873 Female | ≥65 | ≥25 | kg/m2 | ≥3 | Yes | No  | Yes |
| 874 Female | ≥65 | ≥25 | kg/m2 | ≥3 | No  | Yes | No  |
| 875 Male   | ≥65 | <25 | kg/m2 | ≥3 | Yes | No  | No  |
| 876 Male   | <65 | ≥25 | kg/m2 | <3 | Yes | Yes | No  |
| 877 Male   | ≥65 | <25 | kg/m2 | <3 | No  | No  | Yes |
| 878 Male   | ≥65 | ≥25 | kg/m2 | <3 | No  | No  | No  |
| 879 Male   | <65 | ≥25 | kg/m2 | <3 | No  | No  | No  |
| 880 Female | ≥65 | ≥25 | kg/m2 | <3 | No  | No  | No  |
| 881 Male   | ≥65 | ≥25 | kg/m2 | <3 | No  | Yes | Yes |
| 882 Female | <65 | ≥25 | kg/m2 | <3 | No  | No  | Yes |
| 883 Male   | ≥65 | ≥25 | kg/m2 | <3 | No  | No  | No  |
| 884 Male   | ≥65 | <25 | kg/m2 | <3 | No  | No  | No  |
| 885 Female | ≥65 | <25 | kg/m2 | ≥3 | No  | Yes | No  |
| 886 Male   | <65 | ≥25 | kg/m2 | ≥3 | No  | No  | No  |
| 887 Male   | ≥65 | ≥25 | kg/m2 | ≥3 | No  | Yes | No  |
| 888 Male   | ≥65 | <25 | kg/m2 | <3 | No  | No  | No  |
| 889 Male   | <65 | ≥25 | kg/m2 | ≥3 | No  | No  | No  |
| 890 Male   | ≥65 | ≥25 | kg/m2 | <3 | No  | Yes | No  |
| 891 Female | <65 | ≥25 | kg/m2 | <3 | No  | Yes | No  |
| 892 Male   | ≥65 | ≥25 | kg/m2 | <3 | Yes | No  | Yes |
| 893 Female | ≥65 | ≥25 | kg/m2 | <3 | Yes | Yes | Yes |
| 894 Female | ≥65 | <25 | kg/m2 | <3 | Yes | Yes | No  |
| 895 Female | ≥65 | ≥25 | kg/m2 | <3 | No  | Yes | No  |
| 896 Female | ≥65 | ≥25 | kg/m2 | <3 | Yes | No  | No  |
| 897 Male   | ≥65 | ≥25 | kg/m2 | <3 | Yes | No  | No  |
| 898 Male   | ≥65 | ≥25 | kg/m2 | <3 | Yes | No  | No  |
| 899 Male   | ≥65 | ≥25 | kg/m2 | ≥3 | Yes | No  | No  |
| 900 Male   | ≥65 | ≥25 | kg/m2 | <3 | No  | No  | No  |
| 901 Female | <65 | <25 | kg/m2 | ≥3 | Yes | Yes | Yes |
| 902 Female | <65 | ≥25 | kg/m2 | <3 | No  | No  | No  |
| 903 Female | <65 | ≥25 | kg/m2 | ≥3 | Yes | Yes | No  |
| 904 Male   | <65 | <25 | kg/m2 | ≥3 | No  | Yes | No  |
| 905 Male   | <65 | <25 | kg/m2 | <3 | No  | Yes | Yes |
| 906 Female | <65 | ≥25 | kg/m2 | <3 | No  | Yes | No  |
| 907 Female | <65 | ≥25 | kg/m2 | ≥3 | No  | No  | No  |
| 908 Male   | ≥65 | <25 | kg/m2 | ≥3 | No  | No  | No  |
| 909 Male   | <65 | ≥25 | kg/m2 | ≥3 | No  | Yes | Yes |
| 910 Male   | ≥65 | <25 | kg/m2 | ≥3 | No  | Yes | No  |
| 911 Female | <65 | <25 | kg/m2 | ≥3 | Yes | Yes | No  |
| 912 Male   | ≥65 | <25 | kg/m2 | <3 | No  | Yes | No  |
| 913 Female | ≥65 | <25 | kg/m2 | ≥3 | Yes | Yes | No  |
| 914 Female | ≥65 | <25 | kg/m2 | <3 | No  | No  | No  |
| 915 Female | <65 | <25 | kg/m2 | <3 | No  | No  | No  |
| 916 Male   | ≥65 | <25 | kg/m2 | <3 | No  | No  | No  |

|            |     |     |                   |    |     |     |     |
|------------|-----|-----|-------------------|----|-----|-----|-----|
| 917 Female | ≥65 | <25 | kg/m <sup>2</sup> | ≥3 | Yes | No  | Yes |
| 918 Female | ≥65 | <25 | kg/m <sup>2</sup> | <3 | Yes | No  | Yes |
| 919 Female | <65 | ≥25 | kg/m <sup>2</sup> | ≥3 | No  | No  | Yes |
| 920 Female | ≥65 | <25 | kg/m <sup>2</sup> | ≥3 | Yes | No  | Yes |
| 921 Male   | ≥65 | <25 | kg/m <sup>2</sup> | <3 | No  | Yes | No  |
| 922 Male   | ≥65 | <25 | kg/m <sup>2</sup> | ≥3 | Yes | No  | Yes |
| 923 Male   | <65 | <25 | kg/m <sup>2</sup> | <3 | No  | No  | No  |
| 924 Male   | ≥65 | <25 | kg/m <sup>2</sup> | <3 | No  | No  | Yes |
| 925 Female | ≥65 | ≥25 | kg/m <sup>2</sup> | <3 | No  | No  | Yes |
| 926 Female | ≥65 | <25 | kg/m <sup>2</sup> | ≥3 | No  | No  | Yes |
| 927 Male   | ≥65 | <25 | kg/m <sup>2</sup> | ≥3 | No  | No  | No  |
| 928 Female | ≥65 | <25 | kg/m <sup>2</sup> | ≥3 | No  | No  | Yes |
| 929 Female | <65 | ≥25 | kg/m <sup>2</sup> | <3 | No  | No  | No  |
| 930 Female | ≥65 | <25 | kg/m <sup>2</sup> | ≥3 | No  | No  | No  |
| 931 Male   | ≥65 | <25 | kg/m <sup>2</sup> | ≥3 | No  | No  | Yes |
| 932 Male   | ≥65 | ≥25 | kg/m <sup>2</sup> | ≥3 | Yes | Yes | No  |
| 933 Female | <65 | <25 | kg/m <sup>2</sup> | ≥3 | No  | Yes | No  |
| 934 Female | ≥65 | <25 | kg/m <sup>2</sup> | ≥3 | No  | Yes | No  |
| 935 Female | <65 | ≥25 | kg/m <sup>2</sup> | <3 | No  | Yes | Yes |
| 936 Female | ≥65 | <25 | kg/m <sup>2</sup> | <3 | Yes | No  | Yes |
| 937 Female | <65 | <25 | kg/m <sup>2</sup> | <3 | Yes | Yes | Yes |
| 938 Male   | <65 | <25 | kg/m <sup>2</sup> | <3 | Yes | No  | Yes |
| 939 Female | <65 | <25 | kg/m <sup>2</sup> | <3 | Yes | No  | Yes |
| 940 Male   | <65 | <25 | kg/m <sup>2</sup> | <3 | No  | Yes | Yes |
| 941 Female | ≥65 | <25 | kg/m <sup>2</sup> | ≥3 | No  | No  | No  |
| 942 Male   | ≥65 | <25 | kg/m <sup>2</sup> | <3 | No  | Yes | No  |
| 943 Male   | ≥65 | <25 | kg/m <sup>2</sup> | <3 | No  | No  | No  |
| 944 Female | ≥65 | <25 | kg/m <sup>2</sup> | <3 | No  | No  | Yes |
| 945 Female | ≥65 | ≥25 | kg/m <sup>2</sup> | <3 | No  | No  | No  |
| 946 Female | ≥65 | <25 | kg/m <sup>2</sup> | ≥3 | No  | No  | No  |
| 947 Male   | ≥65 | ≥25 | kg/m <sup>2</sup> | <3 | Yes | No  | No  |
| 948 Female | ≥65 | ≥25 | kg/m <sup>2</sup> | <3 | Yes | No  | No  |
| 949 Female | ≥65 | ≥25 | kg/m <sup>2</sup> | <3 | No  | Yes | No  |
| 950 Female | <65 | <25 | kg/m <sup>2</sup> | ≥3 | Yes | Yes | Yes |
| 951 Female | ≥65 | <25 | kg/m <sup>2</sup> | ≥3 | Yes | Yes | Yes |
| 952 Male   | <65 | <25 | kg/m <sup>2</sup> | <3 | No  | Yes | No  |
| 953 Male   | <65 | <25 | kg/m <sup>2</sup> | <3 | Yes | No  | No  |
| 954 Male   | <65 | ≥25 | kg/m <sup>2</sup> | <3 | Yes | Yes | No  |
| 955 Male   | ≥65 | <25 | kg/m <sup>2</sup> | <3 | No  | Yes | No  |
| 956 Female | ≥65 | <25 | kg/m <sup>2</sup> | ≥3 | No  | No  | No  |
| 957 Male   | ≥65 | <25 | kg/m <sup>2</sup> | ≥3 | No  | Yes | No  |
| 958 Male   | ≥65 | <25 | kg/m <sup>2</sup> | <3 | Yes | Yes | No  |
| 959 Male   | ≥65 | <25 | kg/m <sup>2</sup> | <3 | No  | Yes | No  |
| 960 Male   | <65 | <25 | kg/m <sup>2</sup> | <3 | No  | No  | No  |
| 961 Male   | ≥65 | <25 | kg/m <sup>2</sup> | <3 | Yes | Yes | No  |
| 962 Male   | <65 | <25 | kg/m <sup>2</sup> | <3 | Yes | No  | No  |
| 963 Male   | <65 | <25 | kg/m <sup>2</sup> | <3 | No  | Yes | Yes |
| 964 Female | ≥65 | <25 | kg/m <sup>2</sup> | <3 | Yes | No  | No  |
| 965 Male   | <65 | <25 | kg/m <sup>2</sup> | <3 | Yes | No  | No  |
| 966 Male   | ≥65 | ≥25 | kg/m <sup>2</sup> | <3 | Yes | Yes | No  |
| 967 Male   | ≥65 | ≥25 | kg/m <sup>2</sup> | <3 | No  | Yes | No  |
| 968 Male   | ≥65 | <25 | kg/m <sup>2</sup> | <3 | Yes | No  | No  |
| 969 Male   | <65 | <25 | kg/m <sup>2</sup> | <3 | Yes | No  | No  |
| 970 Male   | ≥65 | ≥25 | kg/m <sup>2</sup> | <3 | Yes | Yes | No  |

|             |     |     |       |    |     |     |     |
|-------------|-----|-----|-------|----|-----|-----|-----|
| 971 Female  | <65 | <25 | kg/m2 | ≥3 | Yes | Yes | Yes |
| 972 Male    | <65 | <25 | kg/m2 | ≥3 | Yes | No  | No  |
| 973 Male    | ≥65 | ≥25 | kg/m2 | <3 | No  | No  | No  |
| 974 Male    | ≥65 | <25 | kg/m2 | ≥3 | Yes | No  | No  |
| 975 Male    | <65 | <25 | kg/m2 | ≥3 | No  | Yes | No  |
| 976 Female  | <65 | <25 | kg/m2 | ≥3 | Yes | No  | No  |
| 977 Male    | <65 | <25 | kg/m2 | ≥3 | No  | No  | No  |
| 978 Female  | <65 | <25 | kg/m2 | ≥3 | Yes | Yes | No  |
| 979 Female  | <65 | <25 | kg/m2 | <3 | No  | Yes | No  |
| 980 Male    | ≥65 | <25 | kg/m2 | <3 | No  | No  | No  |
| 981 Female  | ≥65 | <25 | kg/m2 | <3 | No  | No  | No  |
| 982 Female  | ≥65 | ≥25 | kg/m2 | <3 | Yes | Yes | No  |
| 983 Male    | <65 | ≥25 | kg/m2 | ≥3 | Yes | Yes | No  |
| 984 Male    | ≥65 | <25 | kg/m2 | <3 | No  | Yes | No  |
| 985 Female  | ≥65 | <25 | kg/m2 | <3 | Yes | Yes | No  |
| 986 Male    | ≥65 | ≥25 | kg/m2 | ≥3 | No  | No  | No  |
| 987 Male    | ≥65 | ≥25 | kg/m2 | ≥3 | No  | No  | Yes |
| 988 Male    | <65 | ≥25 | kg/m2 | <3 | Yes | Yes | No  |
| 989 Female  | ≥65 | <25 | kg/m2 | <3 | No  | No  | No  |
| 990 Female  | ≥65 | ≥25 | kg/m2 | <3 | No  | No  | No  |
| 991 Female  | <65 | ≥25 | kg/m2 | <3 | No  | No  | No  |
| 992 Male    | ≥65 | <25 | kg/m2 | <3 | Yes | No  | Yes |
| 993 Male    | <65 | <25 | kg/m2 | <3 | No  | No  | Yes |
| 994 Male    | ≥65 | <25 | kg/m2 | <3 | Yes | No  | Yes |
| 995 Male    | <65 | <25 | kg/m2 | <3 | Yes | No  | Yes |
| 996 Male    | ≥65 | <25 | kg/m2 | <3 | No  | No  | Yes |
| 997 Male    | ≥65 | <25 | kg/m2 | <3 | No  | No  | No  |
| 998 Male    | ≥65 | <25 | kg/m2 | <3 | No  | No  | No  |
| 999 Male    | <65 | <25 | kg/m2 | <3 | No  | No  | No  |
| 1000 Male   | ≥65 | <25 | kg/m2 | ≥3 | No  | Yes | No  |
| 1001 Female | <65 | <25 | kg/m2 | ≥3 | No  | Yes | Yes |
| 1002 Male   | <65 | ≥25 | kg/m2 | ≥3 | No  | Yes | Yes |
| 1003 Female | ≥65 | ≥25 | kg/m2 | ≥3 | No  | Yes | No  |
| 1004 Female | <65 | <25 | kg/m2 | <3 | No  | Yes | Yes |
| 1005 Male   | <65 | <25 | kg/m2 | <3 | No  | No  | Yes |
| 1006 Female | ≥65 | <25 | kg/m2 | ≥3 | No  | Yes | No  |
| 1007 Female | <65 | <25 | kg/m2 | ≥3 | No  | No  | No  |
| 1008 Male   | ≥65 | ≥25 | kg/m2 | ≥3 | Yes | No  | Yes |
| 1009 Male   | <65 | <25 | kg/m2 | <3 | No  | No  | No  |
| 1010 Male   | <65 | <25 | kg/m2 | <3 | Yes | No  | No  |
| 1011 Male   | <65 | <25 | kg/m2 | ≥3 | No  | No  | No  |
| 1012 Male   | ≥65 | ≥25 | kg/m2 | <3 | Yes | No  | No  |
| 1013 Female | ≥65 | <25 | kg/m2 | ≥3 | No  | No  | No  |
| 1014 Female | ≥65 | <25 | kg/m2 | ≥3 | Yes | No  | No  |
| 1015 Male   | ≥65 | <25 | kg/m2 | ≥3 | Yes | No  | No  |
| 1016 Male   | <65 | ≥25 | kg/m2 | <3 | No  | No  | No  |
| 1017 Male   | <65 | <25 | kg/m2 | ≥3 | No  | Yes | No  |
| 1018 Male   | ≥65 | <25 | kg/m2 | ≥3 | No  | Yes | Yes |
| 1019 Female | ≥65 | <25 | kg/m2 | ≥3 | No  | No  | Yes |
| 1020 Female | <65 | <25 | kg/m2 | ≥3 | Yes | Yes | No  |
| 1021 Male   | <65 | <25 | kg/m2 | <3 | No  | No  | Yes |
| 1022 Female | ≥65 | <25 | kg/m2 | <3 | Yes | No  | Yes |
| 1023 Male   | <65 | <25 | kg/m2 | <3 | Yes | No  | Yes |
| 1024 Female | ≥65 | <25 | kg/m2 | ≥3 | No  | No  | No  |

|      |        |     |     |                   |    |     |     |     |
|------|--------|-----|-----|-------------------|----|-----|-----|-----|
| 1025 | Male   | <65 | <25 | kg/m <sup>2</sup> | ≥3 | No  | No  | No  |
| 1026 | Male   | ≥65 | ≥25 | kg/m <sup>2</sup> | ≥3 | No  | No  | No  |
| 1027 | Male   | <65 | <25 | kg/m <sup>2</sup> | ≥3 | Yes | No  | No  |
| 1028 | Male   | ≥65 | ≥25 | kg/m <sup>2</sup> | ≥3 | Yes | No  | No  |
| 1029 | Male   | <65 | <25 | kg/m <sup>2</sup> | <3 | Yes | No  | No  |
| 1030 | Female | <65 | ≥25 | kg/m <sup>2</sup> | <3 | Yes | Yes | No  |
| 1031 | Female | <65 | <25 | kg/m <sup>2</sup> | ≥3 | No  | Yes | No  |
| 1032 | Male   | ≥65 | <25 | kg/m <sup>2</sup> | ≥3 | No  | Yes | No  |
| 1033 | Female | ≥65 | ≥25 | kg/m <sup>2</sup> | ≥3 | No  | No  | No  |
| 1034 | Male   | <65 | ≥25 | kg/m <sup>2</sup> | <3 | No  | No  | Yes |
| 1035 | Female | ≥65 | <25 | kg/m <sup>2</sup> | ≥3 | Yes | No  | No  |
| 1036 | Male   | ≥65 | <25 | kg/m <sup>2</sup> | <3 | Yes | Yes | No  |
| 1037 | Female | <65 | <25 | kg/m <sup>2</sup> | ≥3 | No  | Yes | Yes |
| 1038 | Female | ≥65 | <25 | kg/m <sup>2</sup> | <3 | No  | No  | Yes |
| 1039 | Male   | ≥65 | <25 | kg/m <sup>2</sup> | <3 | No  | No  | No  |
| 1040 | Female | ≥65 | <25 | kg/m <sup>2</sup> | <3 | No  | No  | Yes |
| 1041 | Male   | ≥65 | <25 | kg/m <sup>2</sup> | ≥3 | No  | No  | No  |
| 1042 | Male   | ≥65 | <25 | kg/m <sup>2</sup> | ≥3 | No  | No  | No  |
| 1043 | Male   | ≥65 | ≥25 | kg/m <sup>2</sup> | <3 | No  | Yes | Yes |
| 1044 | Male   | <65 | ≥25 | kg/m <sup>2</sup> | <3 | Yes | No  | No  |
| 1045 | Female | ≥65 | ≥25 | kg/m <sup>2</sup> | ≥3 | No  | No  | No  |
| 1046 | Male   | <65 | ≥25 | kg/m <sup>2</sup> | ≥3 | No  | No  | No  |
| 1047 | Female | <65 | <25 | kg/m <sup>2</sup> | <3 | No  | No  | No  |
| 1048 | Female | ≥65 | ≥25 | kg/m <sup>2</sup> | <3 | No  | No  | No  |
| 1049 | Female | <65 | ≥25 | kg/m <sup>2</sup> | <3 | No  | No  | No  |
| 1050 | Male   | <65 | <25 | kg/m <sup>2</sup> | <3 | No  | No  | No  |
| 1051 | Female | <65 | <25 | kg/m <sup>2</sup> | ≥3 | Yes | No  | No  |
| 1052 | Male   | ≥65 | ≥25 | kg/m <sup>2</sup> | <3 | Yes | No  | No  |
| 1053 | Male   | ≥65 | ≥25 | kg/m <sup>2</sup> | <3 | Yes | No  | No  |
| 1054 | Male   | ≥65 | ≥25 | kg/m <sup>2</sup> | <3 | Yes | No  | No  |
| 1055 | Male   | ≥65 | ≥25 | kg/m <sup>2</sup> | ≥3 | Yes | No  | No  |
| 1056 | Female | <65 | <25 | kg/m <sup>2</sup> | <3 | Yes | No  | No  |
| 1057 | Male   | <65 | <25 | kg/m <sup>2</sup> | <3 | No  | No  | Yes |
| 1058 | Female | <65 | <25 | kg/m <sup>2</sup> | ≥3 | Yes | No  | Yes |
| 1059 | Male   | ≥65 | <25 | kg/m <sup>2</sup> | <3 | No  | No  | No  |
| 1060 | Male   | ≥65 | <25 | kg/m <sup>2</sup> | ≥3 | No  | Yes | Yes |
| 1061 | Female | ≥65 | <25 | kg/m <sup>2</sup> | <3 | No  | Yes | Yes |
| 1062 | Male   | ≥65 | <25 | kg/m <sup>2</sup> | <3 | No  | Yes | No  |
| 1063 | Male   | <65 | <25 | kg/m <sup>2</sup> | ≥3 | No  | No  | No  |
| 1064 | Male   | ≥65 | <25 | kg/m <sup>2</sup> | ≥3 | No  | Yes | No  |
| 1065 | Female | ≥65 | <25 | kg/m <sup>2</sup> | ≥3 | No  | Yes | No  |
| 1066 | Female | <65 | <25 | kg/m <sup>2</sup> | <3 | No  | Yes | No  |
| 1067 | Male   | ≥65 | ≥25 | kg/m <sup>2</sup> | <3 | No  | Yes | No  |
| 1068 | Female | ≥65 | ≥25 | kg/m <sup>2</sup> | <3 | Yes | No  | No  |
| 1069 | Female | ≥65 | ≥25 | kg/m <sup>2</sup> | <3 | Yes | No  | No  |
| 1070 | Male   | ≥65 | <25 | kg/m <sup>2</sup> | <3 | Yes | No  | No  |
| 1071 | Male   | <65 | ≥25 | kg/m <sup>2</sup> | <3 | Yes | No  | Yes |
| 1072 | Male   | <65 | <25 | kg/m <sup>2</sup> | <3 | No  | Yes | No  |
| 1073 | Female | ≥65 | <25 | kg/m <sup>2</sup> | <3 | No  | No  | No  |
| 1074 | Female | ≥65 | ≥25 | kg/m <sup>2</sup> | <3 | No  | Yes | Yes |
| 1075 | Female | ≥65 | <25 | kg/m <sup>2</sup> | <3 | No  | Yes | Yes |
| 1076 | Female | ≥65 | ≥25 | kg/m <sup>2</sup> | ≥3 | No  | No  | Yes |
| 1077 | Male   | <65 | ≥25 | kg/m <sup>2</sup> | ≥3 | No  | No  | No  |
| 1078 | Male   | <65 | ≥25 | kg/m <sup>2</sup> | ≥3 | No  | No  | No  |

|      |        |     |     |                   |    |     |     |     |
|------|--------|-----|-----|-------------------|----|-----|-----|-----|
| 1079 | Female | ≥65 | <25 | kg/m <sup>2</sup> | <3 | No  | No  | No  |
| 1080 | Male   | <65 | <25 | kg/m <sup>2</sup> | <3 | Yes | Yes | Yes |
| 1081 | Male   | ≥65 | <25 | kg/m <sup>2</sup> | <3 | No  | No  | No  |
| 1082 | Female | <65 | <25 | kg/m <sup>2</sup> | <3 | No  | Yes | No  |
| 1083 | Female | <65 | <25 | kg/m <sup>2</sup> | ≥3 | Yes | No  | No  |
| 1084 | Female | ≥65 | <25 | kg/m <sup>2</sup> | <3 | No  | Yes | No  |
| 1085 | Female | ≥65 | <25 | kg/m <sup>2</sup> | ≥3 | Yes | No  | No  |
| 1086 | Female | ≥65 | ≥25 | kg/m <sup>2</sup> | <3 | Yes | No  | No  |
| 1087 | Male   | ≥65 | ≥25 | kg/m <sup>2</sup> | ≥3 | Yes | No  | No  |
| 1088 | Male   | ≥65 | ≥25 | kg/m <sup>2</sup> | <3 | Yes | No  | No  |
| 1089 | Male   | ≥65 | <25 | kg/m <sup>2</sup> | <3 | No  | No  | No  |
| 1090 | Male   | ≥65 | <25 | kg/m <sup>2</sup> | <3 | No  | No  | No  |
| 1091 | Male   | <65 | <25 | kg/m <sup>2</sup> | <3 | Yes | No  | No  |
| 1092 | Male   | <65 | ≥25 | kg/m <sup>2</sup> | <3 | No  | Yes | No  |
| 1093 | Male   | ≥65 | ≥25 | kg/m <sup>2</sup> | ≥3 | No  | No  | Yes |
| 1094 | Female | <65 | ≥25 | kg/m <sup>2</sup> | ≥3 | Yes | No  | No  |
| 1095 | Male   | <65 | ≥25 | kg/m <sup>2</sup> | ≥3 | No  | No  | No  |
| 1096 | Female | <65 | ≥25 | kg/m <sup>2</sup> | ≥3 | Yes | No  | Yes |
| 1097 | Female | <65 | <25 | kg/m <sup>2</sup> | <3 | No  | Yes | No  |
| 1098 | Female | ≥65 | <25 | kg/m <sup>2</sup> | ≥3 | No  | No  | Yes |
| 1099 | Female | <65 | <25 | kg/m <sup>2</sup> | ≥3 | No  | No  | No  |
| 1100 | Female | ≥65 | <25 | kg/m <sup>2</sup> | <3 | No  | No  | Yes |
| 1101 | Male   | ≥65 | <25 | kg/m <sup>2</sup> | <3 | No  | No  | No  |
| 1102 | Female | <65 | ≥25 | kg/m <sup>2</sup> | <3 | No  | No  | No  |
| 1103 | Female | ≥65 | ≥25 | kg/m <sup>2</sup> | <3 | Yes | Yes | No  |
| 1104 | Male   | ≥65 | ≥25 | kg/m <sup>2</sup> | <3 | No  | No  | No  |
| 1105 | Male   | <65 | ≥25 | kg/m <sup>2</sup> | ≥3 | Yes | No  | No  |
| 1106 | Female | <65 | <25 | kg/m <sup>2</sup> | <3 | Yes | Yes | No  |
| 1107 | Female | ≥65 | ≥25 | kg/m <sup>2</sup> | <3 | Yes | No  | Yes |
| 1108 | Female | ≥65 | ≥25 | kg/m <sup>2</sup> | ≥3 | Yes | No  | No  |
| 1109 | Female | <65 | <25 | kg/m <sup>2</sup> | <3 | No  | No  | No  |
| 1110 | Male   | <65 | <25 | kg/m <sup>2</sup> | <3 | Yes | No  | No  |
| 1111 | Male   | <65 | ≥25 | kg/m <sup>2</sup> | <3 | No  | No  | No  |
| 1112 | Male   | ≥65 | ≥25 | kg/m <sup>2</sup> | ≥3 | No  | Yes | No  |
| 1113 | Female | ≥65 | <25 | kg/m <sup>2</sup> | ≥3 | No  | No  | No  |
| 1114 | Male   | ≥65 | <25 | kg/m <sup>2</sup> | <3 | Yes | Yes | No  |
| 1115 | Male   | ≥65 | <25 | kg/m <sup>2</sup> | <3 | Yes | Yes | No  |
| 1116 | Male   | ≥65 | <25 | kg/m <sup>2</sup> | <3 | No  | Yes | No  |
| 1117 | Male   | ≥65 | ≥25 | kg/m <sup>2</sup> | ≥3 | Yes | Yes | Yes |
| 1118 | Male   | ≥65 | <25 | kg/m <sup>2</sup> | ≥3 | No  | Yes | No  |
| 1119 | Male   | <65 | <25 | kg/m <sup>2</sup> | ≥3 | Yes | No  | No  |
| 1120 | Male   | ≥65 | <25 | kg/m <sup>2</sup> | ≥3 | No  | Yes | No  |
| 1121 | Female | <65 | <25 | kg/m <sup>2</sup> | ≥3 | Yes | No  | No  |
| 1122 | Male   | <65 | ≥25 | kg/m <sup>2</sup> | <3 | No  | No  | No  |
| 1123 | Female | ≥65 | <25 | kg/m <sup>2</sup> | ≥3 | No  | No  | No  |
| 1124 | Female | ≥65 | <25 | kg/m <sup>2</sup> | ≥3 | No  | No  | No  |
| 1125 | Male   | <65 | ≥25 | kg/m <sup>2</sup> | ≥3 | No  | No  | Yes |
| 1126 | Male   | <65 | ≥25 | kg/m <sup>2</sup> | <3 | No  | No  | Yes |
| 1127 | Female | ≥65 | <25 | kg/m <sup>2</sup> | ≥3 | No  | No  | No  |
| 1128 | Male   | <65 | ≥25 | kg/m <sup>2</sup> | ≥3 | No  | No  | Yes |
| 1129 | Female | ≥65 | ≥25 | kg/m <sup>2</sup> | <3 | No  | No  | Yes |
| 1130 | Male   | ≥65 | <25 | kg/m <sup>2</sup> | ≥3 | No  | No  | Yes |
| 1131 | Female | ≥65 | <25 | kg/m <sup>2</sup> | <3 | No  | No  | Yes |
| 1132 | Male   | ≥65 | ≥25 | kg/m <sup>2</sup> | <3 | Yes | No  | Yes |

|      |        |     |     |                   |    |     |     |     |
|------|--------|-----|-----|-------------------|----|-----|-----|-----|
| 1133 | Male   | <65 | ≥25 | kg/m <sup>2</sup> | ≥3 | No  | No  | Yes |
| 1134 | Male   | ≥65 | <25 | kg/m <sup>2</sup> | ≥3 | Yes | No  | Yes |
| 1135 | Male   | ≥65 | <25 | kg/m <sup>2</sup> | <3 | Yes | Yes | Yes |
| 1136 | Male   | <65 | <25 | kg/m <sup>2</sup> | <3 | No  | Yes | No  |
| 1137 | Male   | <65 | <25 | kg/m <sup>2</sup> | ≥3 | Yes | Yes | No  |
| 1138 | Male   | <65 | <25 | kg/m <sup>2</sup> | <3 | No  | Yes | No  |
| 1139 | Male   | <65 | <25 | kg/m <sup>2</sup> | <3 | Yes | Yes | No  |
| 1140 | Female | <65 | <25 | kg/m <sup>2</sup> | <3 | No  | Yes | Yes |
| 1141 | Male   | <65 | ≥25 | kg/m <sup>2</sup> | <3 | Yes | Yes | No  |
| 1142 | Male   | <65 | ≥25 | kg/m <sup>2</sup> | <3 | Yes | Yes | No  |
| 1143 | Female | <65 | ≥25 | kg/m <sup>2</sup> | <3 | No  | No  | No  |
| 1144 | Female | <65 | ≥25 | kg/m <sup>2</sup> | <3 | No  | No  | Yes |
| 1145 | Female | ≥65 | ≥25 | kg/m <sup>2</sup> | <3 | No  | No  | No  |
| 1146 | Male   | ≥65 | <25 | kg/m <sup>2</sup> | <3 | No  | No  | No  |
| 1147 | Male   | <65 | <25 | kg/m <sup>2</sup> | <3 | No  | No  | No  |
| 1148 | Male   | <65 | <25 | kg/m <sup>2</sup> | <3 | No  | No  | No  |
| 1149 | Female | <65 | <25 | kg/m <sup>2</sup> | <3 | No  | No  | No  |
| 1150 | Female | <65 | <25 | kg/m <sup>2</sup> | ≥3 | No  | No  | No  |
| 1151 | Male   | ≥65 | <25 | kg/m <sup>2</sup> | <3 | No  | No  | No  |
| 1152 | Male   | ≥65 | ≥25 | kg/m <sup>2</sup> | <3 | No  | Yes | No  |
| 1153 | Male   | ≥65 | <25 | kg/m <sup>2</sup> | ≥3 | No  | No  | No  |
| 1154 | Male   | ≥65 | <25 | kg/m <sup>2</sup> | ≥3 | No  | No  | No  |
| 1155 | Male   | ≥65 | <25 | kg/m <sup>2</sup> | <3 | No  | Yes | Yes |
| 1156 | Male   | <65 | <25 | kg/m <sup>2</sup> | <3 | No  | Yes | Yes |
| 1157 | Male   | ≥65 | <25 | kg/m <sup>2</sup> | <3 | Yes | No  | No  |
| 1158 | Male   | ≥65 | <25 | kg/m <sup>2</sup> | <3 | Yes | Yes | No  |
| 1159 | Male   | ≥65 | ≥25 | kg/m <sup>2</sup> | <3 | No  | Yes | No  |
| 1160 | Female | ≥65 | <25 | kg/m <sup>2</sup> | <3 | Yes | No  | No  |
| 1161 | Male   | ≥65 | <25 | kg/m <sup>2</sup> | <3 | No  | No  | No  |
| 1162 | Male   | ≥65 | <25 | kg/m <sup>2</sup> | ≥3 | No  | No  | No  |
| 1163 | Male   | ≥65 | <25 | kg/m <sup>2</sup> | ≥3 | No  | No  | No  |
| 1164 | Female | ≥65 | ≥25 | kg/m <sup>2</sup> | <3 | Yes | Yes | No  |
| 1165 | Male   | <65 | <25 | kg/m <sup>2</sup> | ≥3 | No  | No  | No  |
| 1166 | Male   | <65 | ≥25 | kg/m <sup>2</sup> | ≥3 | No  | No  | No  |
| 1167 | Female | <65 | <25 | kg/m <sup>2</sup> | <3 | Yes | Yes | No  |
| 1168 | Female | ≥65 | ≥25 | kg/m <sup>2</sup> | <3 | Yes | No  | No  |
| 1169 | Female | <65 | ≥25 | kg/m <sup>2</sup> | <3 | No  | No  | No  |
| 1170 | Female | <65 | <25 | kg/m <sup>2</sup> | <3 | Yes | Yes | Yes |
| 1171 | Female | <65 | ≥25 | kg/m <sup>2</sup> | <3 | No  | Yes | Yes |
| 1172 | Female | ≥65 | ≥25 | kg/m <sup>2</sup> | <3 | No  | No  | No  |
| 1173 | Female | ≥65 | <25 | kg/m <sup>2</sup> | <3 | No  | Yes | Yes |
| 1174 | Male   | <65 | <25 | kg/m <sup>2</sup> | <3 | No  | Yes | No  |
| 1175 | Male   | ≥65 | <25 | kg/m <sup>2</sup> | <3 | Yes | Yes | No  |
| 1176 | Male   | <65 | <25 | kg/m <sup>2</sup> | <3 | Yes | Yes | No  |
| 1177 | Male   | ≥65 | <25 | kg/m <sup>2</sup> | ≥3 | Yes | No  | No  |
| 1178 | Male   | <65 | <25 | kg/m <sup>2</sup> | ≥3 | Yes | No  | No  |
| 1179 | Male   | ≥65 | ≥25 | kg/m <sup>2</sup> | ≥3 | No  | Yes | No  |
| 1180 | Female | ≥65 | ≥25 | kg/m <sup>2</sup> | <3 | No  | Yes | No  |
| 1181 | Female | ≥65 | ≥25 | kg/m <sup>2</sup> | ≥3 | Yes | No  | No  |
| 1182 | Male   | ≥65 | <25 | kg/m <sup>2</sup> | <3 | No  | Yes | No  |
| 1183 | Female | ≥65 | ≥25 | kg/m <sup>2</sup> | <3 | No  | Yes | No  |
| 1184 | Female | ≥65 | ≥25 | kg/m <sup>2</sup> | <3 | No  | Yes | No  |
| 1185 | Male   | ≥65 | ≥25 | kg/m <sup>2</sup> | <3 | No  | No  | No  |
| 1186 | Female | ≥65 | ≥25 | kg/m <sup>2</sup> | <3 | Yes | Yes | Yes |

|      |        |     |     |                   |    |     |     |     |
|------|--------|-----|-----|-------------------|----|-----|-----|-----|
| 1187 | Male   | ≥65 | <25 | kg/m <sup>2</sup> | <3 | Yes | No  | No  |
| 1188 | Female | ≥65 | ≥25 | kg/m <sup>2</sup> | <3 | No  | Yes | Yes |
| 1189 | Male   | ≥65 | <25 | kg/m <sup>2</sup> | <3 | Yes | No  | No  |
| 1190 | Female | <65 | <25 | kg/m <sup>2</sup> | <3 | Yes | No  | No  |
| 1191 | Male   | <65 | <25 | kg/m <sup>2</sup> | <3 | No  | No  | No  |
| 1192 | Female | ≥65 | <25 | kg/m <sup>2</sup> | <3 | Yes | No  | No  |
| 1193 | Female | ≥65 | <25 | kg/m <sup>2</sup> | <3 | No  | No  | No  |
| 1194 | Male   | <65 | <25 | kg/m <sup>2</sup> | <3 | No  | No  | No  |
| 1195 | Male   | ≥65 | ≥25 | kg/m <sup>2</sup> | ≥3 | No  | No  | No  |
| 1196 | Male   | ≥65 | ≥25 | kg/m <sup>2</sup> | <3 | No  | No  | No  |
| 1197 | Male   | ≥65 | ≥25 | kg/m <sup>2</sup> | ≥3 | No  | No  | No  |
| 1198 | Male   | ≥65 | ≥25 | kg/m <sup>2</sup> | <3 | No  | No  | No  |
| 1199 | Female | <65 | ≥25 | kg/m <sup>2</sup> | <3 | No  | No  | No  |
| 1200 | Female | <65 | <25 | kg/m <sup>2</sup> | ≥3 | Yes | No  | No  |
| 1201 | Female | <65 | <25 | kg/m <sup>2</sup> | <3 | Yes | No  | Yes |
| 1202 | Male   | <65 | ≥25 | kg/m <sup>2</sup> | <3 | No  | No  | Yes |
| 1203 | Male   | <65 | <25 | kg/m <sup>2</sup> | ≥3 | No  | No  | Yes |
| 1204 | Male   | ≥65 | <25 | kg/m <sup>2</sup> | <3 | No  | No  | No  |
| 1205 | Female | ≥65 | <25 | kg/m <sup>2</sup> | <3 | Yes | No  | No  |
| 1206 | Female | ≥65 | <25 | kg/m <sup>2</sup> | <3 | Yes | No  | Yes |
| 1207 | Male   | ≥65 | <25 | kg/m <sup>2</sup> | ≥3 | No  | Yes | No  |
| 1208 | Male   | ≥65 | <25 | kg/m <sup>2</sup> | ≥3 | No  | No  | Yes |
| 1209 | Male   | ≥65 | ≥25 | kg/m <sup>2</sup> | <3 | No  | No  | No  |
| 1210 | Female | ≥65 | ≥25 | kg/m <sup>2</sup> | ≥3 | Yes | No  | No  |
| 1211 | Male   | ≥65 | ≥25 | kg/m <sup>2</sup> | ≥3 | No  | Yes | No  |
| 1212 | Male   | ≥65 | <25 | kg/m <sup>2</sup> | <3 | Yes | Yes | Yes |
| 1213 | Male   | <65 | <25 | kg/m <sup>2</sup> | ≥3 | Yes | Yes | No  |
| 1214 | Female | <65 | <25 | kg/m <sup>2</sup> | ≥3 | No  | No  | No  |
| 1215 | Male   | ≥65 | <25 | kg/m <sup>2</sup> | <3 | No  | No  | No  |
| 1216 | Male   | <65 | <25 | kg/m <sup>2</sup> | <3 | No  | No  | No  |
| 1217 | Male   | ≥65 | <25 | kg/m <sup>2</sup> | <3 | No  | Yes | No  |
| 1218 | Male   | <65 | <25 | kg/m <sup>2</sup> | <3 | No  | Yes | Yes |
| 1219 | Male   | ≥65 | <25 | kg/m <sup>2</sup> | <3 | No  | No  | No  |
| 1220 | Male   | ≥65 | <25 | kg/m <sup>2</sup> | <3 | Yes | Yes | No  |
| 1221 | Male   | ≥65 | <25 | kg/m <sup>2</sup> | <3 | Yes | Yes | No  |
| 1222 | Female | <65 | <25 | kg/m <sup>2</sup> | <3 | Yes | Yes | No  |
| 1223 | Male   | ≥65 | ≥25 | kg/m <sup>2</sup> | ≥3 | No  | No  | Yes |
| 1224 | Female | ≥65 | <25 | kg/m <sup>2</sup> | <3 | No  | No  | Yes |
| 1225 | Male   | ≥65 | ≥25 | kg/m <sup>2</sup> | ≥3 | Yes | No  | Yes |
| 1226 | Female | ≥65 | ≥25 | kg/m <sup>2</sup> | ≥3 | Yes | No  | No  |
| 1227 | Male   | ≥65 | <25 | kg/m <sup>2</sup> | ≥3 | No  | No  | No  |
| 1228 | Male   | ≥65 | ≥25 | kg/m <sup>2</sup> | <3 | No  | No  | Yes |
| 1229 | Female | ≥65 | <25 | kg/m <sup>2</sup> | ≥3 | No  | No  | No  |
| 1230 | Male   | ≥65 | <25 | kg/m <sup>2</sup> | <3 | No  | No  | No  |
| 1231 | Female | ≥65 | <25 | kg/m <sup>2</sup> | ≥3 | No  | No  | No  |
| 1232 | Male   | ≥65 | <25 | kg/m <sup>2</sup> | <3 | No  | No  | No  |
| 1233 | Male   | ≥65 | <25 | kg/m <sup>2</sup> | ≥3 | Yes | No  | No  |
| 1234 | Male   | ≥65 | ≥25 | kg/m <sup>2</sup> | <3 | No  | No  | No  |
| 1235 | Male   | ≥65 | <25 | kg/m <sup>2</sup> | <3 | Yes | No  | No  |
| 1236 | Female | ≥65 | ≥25 | kg/m <sup>2</sup> | ≥3 | No  | No  | No  |
| 1237 | Male   | <65 | <25 | kg/m <sup>2</sup> | <3 | Yes | No  | No  |
| 1238 | Female | <65 | ≥25 | kg/m <sup>2</sup> | ≥3 | No  | Yes | Yes |
| 1239 | Female | <65 | ≥25 | kg/m <sup>2</sup> | <3 | Yes | No  | No  |

| Chemotherapy | Radiotherapy | ALB     | CEA level | CA19-9 level | NRS2002 score | Anemia | Ileus |
|--------------|--------------|---------|-----------|--------------|---------------|--------|-------|
| No           | No           | <30 g/L | ≥5 ng/ml  | <37 U/mL     | ≥3            | No     | Yes   |
| No           | Yes          | <30 g/L | <5 ng/ml  | ≥37 U/mL     | <3            | Yes    | No    |
| Yes          | No           | <30 g/L | ≥5 ng/ml  | <37 U/mL     | ≥3            | No     | Yes   |
| No           | No           | ≥30 g/L | ≥5 ng/ml  | <37 U/mL     | ≥3            | No     | No    |
| Yes          | Yes          | <30 g/L | ≥5 ng/ml  | ≥37 U/mL     | ≥3            | No     | No    |
| No           | No           | ≥30 g/L | ≥5 ng/ml  | ≥37 U/mL     | <3            | No     | No    |
| No           | No           | <30 g/L | <5 ng/ml  | ≥37 U/mL     | <3            | Yes    | Yes   |
| No           | Yes          | ≥30 g/L | ≥5 ng/ml  | <37 U/mL     | <3            | No     | No    |
| No           | Yes          | <30 g/L | <5 ng/ml  | <37 U/mL     | <3            | Yes    | No    |
| No           | Yes          | ≥30 g/L | <5 ng/ml  | <37 U/mL     | <3            | Yes    | No    |
| No           | No           | ≥30 g/L | <5 ng/ml  | <37 U/mL     | <3            | No     | Yes   |
| No           | No           | <30 g/L | <5 ng/ml  | <37 U/mL     | ≥3            | Yes    | No    |
| No           | Yes          | <30 g/L | <5 ng/ml  | <37 U/mL     | ≥3            | Yes    | No    |
| Yes          | No           | <30 g/L | <5 ng/ml  | <37 U/mL     | ≥3            | No     | No    |
| No           | No           | <30 g/L | <5 ng/ml  | <37 U/mL     | ≥3            | No     | Yes   |
| No           | Yes          | <30 g/L | <5 ng/ml  | <37 U/mL     | ≥3            | Yes    | Yes   |
| No           | No           | <30 g/L | <5 ng/ml  | <37 U/mL     | <3            | Yes    | No    |
| No           | Yes          | <30 g/L | <5 ng/ml  | <37 U/mL     | <3            | No     | Yes   |
| No           | Yes          | <30 g/L | <5 ng/ml  | <37 U/mL     | <3            | No     | Yes   |
| No           | No           | <30 g/L | <5 ng/ml  | ≥37 U/mL     | <3            | Yes    | Yes   |
| Yes          | Yes          | <30 g/L | <5 ng/ml  | <37 U/mL     | <3            | Yes    | No    |
| No           | Yes          | <30 g/L | <5 ng/ml  | <37 U/mL     | <3            | No     | No    |
| No           | Yes          | <30 g/L | <5 ng/ml  | <37 U/mL     | ≥3            | Yes    | Yes   |
| No           | Yes          | <30 g/L | <5 ng/ml  | <37 U/mL     | ≥3            | No     | Yes   |
| No           | No           | <30 g/L | <5 ng/ml  | <37 U/mL     | ≥3            | No     | No    |
| No           | Yes          | <30 g/L | ≥5 ng/ml  | ≥37 U/mL     | <3            | No     | No    |
| No           | No           | <30 g/L | <5 ng/ml  | <37 U/mL     | <3            | No     | Yes   |
| No           | No           | <30 g/L | <5 ng/ml  | <37 U/mL     | <3            | No     | No    |
| No           | Yes          | ≥30 g/L | <5 ng/ml  | <37 U/mL     | ≥3            | No     | Yes   |
| No           | Yes          | <30 g/L | ≥5 ng/ml  | <37 U/mL     | ≥3            | Yes    | Yes   |
| No           | Yes          | <30 g/L | <5 ng/ml  | <37 U/mL     | ≥3            | Yes    | Yes   |
| No           | Yes          | <30 g/L | ≥5 ng/ml  | <37 U/mL     | ≥3            | Yes    | No    |
| No           | Yes          | ≥30 g/L | ≥5 ng/ml  | <37 U/mL     | <3            | No     | Yes   |
| No           | No           | <30 g/L | <5 ng/ml  | <37 U/mL     | <3            | No     | Yes   |
| No           | No           | <30 g/L | <5 ng/ml  | <37 U/mL     | <3            | No     | Yes   |
| Yes          | Yes          | <30 g/L | <5 ng/ml  | <37 U/mL     | <3            | No     | Yes   |
| Yes          | Yes          | <30 g/L | <5 ng/ml  | <37 U/mL     | <3            | Yes    | Yes   |
| No           | Yes          | <30 g/L | <5 ng/ml  | <37 U/mL     | <3            | No     | Yes   |
| Yes          | Yes          | <30 g/L | <5 ng/ml  | <37 U/mL     | <3            | Yes    | Yes   |
| No           | Yes          | <30 g/L | <5 ng/ml  | <37 U/mL     | <3            | Yes    | No    |
| Yes          | Yes          | <30 g/L | <5 ng/ml  | <37 U/mL     | <3            | No     | No    |
| Yes          | Yes          | <30 g/L | <5 ng/ml  | <37 U/mL     | ≥3            | No     | Yes   |
| No           | Yes          | <30 g/L | <5 ng/ml  | <37 U/mL     | ≥3            | No     | No    |
| No           | No           | <30 g/L | <5 ng/ml  | <37 U/mL     | <3            | Yes    | No    |
| No           | No           | ≥30 g/L | <5 ng/ml  | <37 U/mL     | ≥3            | Yes    | Yes   |
| No           | Yes          | ≥30 g/L | <5 ng/ml  | <37 U/mL     | <3            | No     | No    |
| No           | Yes          | <30 g/L | <5 ng/ml  | <37 U/mL     | <3            | No     | Yes   |
| No           | Yes          | ≥30 g/L | <5 ng/ml  | <37 U/mL     | <3            | Yes    | No    |
| No           | Yes          | ≥30 g/L | <5 ng/ml  | <37 U/mL     | <3            | Yes    | Yes   |
| No           | Yes          | <30 g/L | <5 ng/ml  | <37 U/mL     | <3            | No     | No    |
| No           | No           | <30 g/L | <5 ng/ml  | <37 U/mL     | <3            | No     | No    |
| No           | No           | <30 g/L | <5 ng/ml  | ≥37 U/mL     | <3            | No     | No    |



|     |     |         |          |          |    |     |     |
|-----|-----|---------|----------|----------|----|-----|-----|
| No  | Yes | <30 g/L | <5 ng/ml | <37 U/mL | <3 | No  | Yes |
| Yes | Yes | <30 g/L | ≥5 ng/ml | <37 U/mL | <3 | No  | Yes |
| No  | No  | <30 g/L | ≥5 ng/ml | <37 U/mL | ≥3 | Yes | No  |
| No  | Yes | <30 g/L | <5 ng/ml | <37 U/mL | ≥3 | No  | No  |
| No  | Yes | <30 g/L | ≥5 ng/ml | ≥37 U/mL | <3 | No  | No  |
| No  | Yes | <30 g/L | <5 ng/ml | ≥37 U/mL | <3 | No  | Yes |
| No  | No  | <30 g/L | <5 ng/ml | ≥37 U/mL | <3 | No  | Yes |
| Yes | No  | ≥30 g/L | ≥5 ng/ml | ≥37 U/mL | <3 | No  | Yes |
| Yes | Yes | <30 g/L | <5 ng/ml | ≥37 U/mL | <3 | No  | Yes |
| No  | Yes | <30 g/L | <5 ng/ml | ≥37 U/mL | <3 | No  | Yes |
| No  | Yes | ≥30 g/L | <5 ng/ml | <37 U/mL | ≥3 | No  | Yes |
| No  | Yes | ≥30 g/L | <5 ng/ml | ≥37 U/mL | ≥3 | Yes | Yes |
| No  | No  | <30 g/L | <5 ng/ml | ≥37 U/mL | ≥3 | No  | Yes |
| No  | Yes | <30 g/L | <5 ng/ml | <37 U/mL | ≥3 | No  | No  |
| No  | No  | <30 g/L | <5 ng/ml | <37 U/mL | <3 | No  | Yes |
| No  | No  | <30 g/L | <5 ng/ml | <37 U/mL | <3 | No  | Yes |
| No  | Yes | <30 g/L | <5 ng/ml | <37 U/mL | ≥3 | No  | Yes |
| No  | No  | <30 g/L | <5 ng/ml | <37 U/mL | ≥3 | No  | Yes |
| No  | Yes | <30 g/L | <5 ng/ml | <37 U/mL | <3 | No  | No  |
| No  | Yes | <30 g/L | <5 ng/ml | <37 U/mL | <3 | No  | Yes |
| No  | Yes | <30 g/L | <5 ng/ml | <37 U/mL | <3 | Yes | Yes |
| No  | Yes | ≥30 g/L | <5 ng/ml | <37 U/mL | <3 | Yes | No  |
| No  | Yes | ≥30 g/L | <5 ng/ml | <37 U/mL | <3 | No  | Yes |
| No  | Yes | <30 g/L | <5 ng/ml | <37 U/mL | <3 | No  | No  |
| No  | No  | <30 g/L | <5 ng/ml | <37 U/mL | <3 | No  | No  |
| No  | Yes | ≥30 g/L | <5 ng/ml | <37 U/mL | <3 | No  | Yes |
| Yes | Yes | ≥30 g/L | <5 ng/ml | <37 U/mL | <3 | No  | No  |
| No  | No  | <30 g/L | ≥5 ng/ml | <37 U/mL | ≥3 | Yes | No  |
| Yes | Yes | ≥30 g/L | <5 ng/ml | <37 U/mL | ≥3 | No  | Yes |
| No  | Yes | ≥30 g/L | <5 ng/ml | <37 U/mL | <3 | No  | Yes |
| No  | Yes | <30 g/L | <5 ng/ml | <37 U/mL | <3 | Yes | Yes |
| No  | Yes | <30 g/L | <5 ng/ml | <37 U/mL | <3 | Yes | Yes |
| Yes | No  | <30 g/L | ≥5 ng/ml | <37 U/mL | <3 | Yes | No  |
| Yes | No  | <30 g/L | ≥5 ng/ml | <37 U/mL | <3 | No  | Yes |
| No  | Yes | <30 g/L | <5 ng/ml | <37 U/mL | ≥3 | No  | Yes |
| No  | No  | <30 g/L | <5 ng/ml | <37 U/mL | <3 | No  | No  |
| No  | No  | <30 g/L | <5 ng/ml | <37 U/mL | <3 | No  | Yes |
| Yes | Yes | <30 g/L | <5 ng/ml | ≥37 U/mL | ≥3 | No  | Yes |
| No  | Yes | ≥30 g/L | <5 ng/ml | ≥37 U/mL | <3 | No  | No  |
| No  | Yes | ≥30 g/L | <5 ng/ml | <37 U/mL | <3 | No  | No  |
| Yes | Yes | ≥30 g/L | <5 ng/ml | ≥37 U/mL | <3 | Yes | No  |
| No  | Yes | ≥30 g/L | <5 ng/ml | <37 U/mL | ≥3 | No  | Yes |
| No  | No  | ≥30 g/L | <5 ng/ml | <37 U/mL | ≥3 | No  | No  |
| No  | Yes | <30 g/L | <5 ng/ml | <37 U/mL | ≥3 | No  | Yes |
| No  | No  | <30 g/L | <5 ng/ml | ≥37 U/mL | <3 | No  | Yes |
| No  | Yes | <30 g/L | <5 ng/ml | <37 U/mL | ≥3 | No  | Yes |
| No  | No  | <30 g/L | <5 ng/ml | <37 U/mL | ≥3 | No  | No  |
| No  | Yes | <30 g/L | ≥5 ng/ml | ≥37 U/mL | ≥3 | Yes | Yes |
| No  | Yes | <30 g/L | <5 ng/ml | ≥37 U/mL | ≥3 | Yes | No  |
| No  | Yes | ≥30 g/L | <5 ng/ml | ≥37 U/mL | ≥3 | Yes | Yes |
| Yes | Yes | ≥30 g/L | <5 ng/ml | <37 U/mL | ≥3 | No  | Yes |

|     |     |         |          |          |    |     |     |
|-----|-----|---------|----------|----------|----|-----|-----|
| Yes | No  | <30 g/L | <5 ng/ml | <37 U/mL | ≥3 | No  | Yes |
| Yes | Yes | ≥30 g/L | <5 ng/ml | <37 U/mL | ≥3 | No  | No  |
| Yes | No  | ≥30 g/L | <5 ng/ml | <37 U/mL | ≥3 | No  | No  |
| No  | Yes | <30 g/L | <5 ng/ml | <37 U/mL | <3 | No  | No  |
| No  | Yes | <30 g/L | <5 ng/ml | <37 U/mL | <3 | No  | No  |
| No  | Yes | ≥30 g/L | <5 ng/ml | <37 U/mL | <3 | Yes | No  |
| Yes | No  | ≥30 g/L | ≥5 ng/ml | <37 U/mL | <3 | No  | No  |
| No  | Yes | ≥30 g/L | <5 ng/ml | <37 U/mL | <3 | No  | No  |
| Yes | Yes | ≥30 g/L | ≥5 ng/ml | <37 U/mL | <3 | No  | No  |
| No  | Yes | ≥30 g/L | ≥5 ng/ml | <37 U/mL | <3 | No  | No  |
| No  | No  | ≥30 g/L | <5 ng/ml | <37 U/mL | <3 | No  | No  |
| No  | Yes | ≥30 g/L | <5 ng/ml | <37 U/mL | <3 | Yes | No  |
| No  | Yes | ≥30 g/L | <5 ng/ml | <37 U/mL | <3 | No  | No  |
| No  | No  | <30 g/L | ≥5 ng/ml | <37 U/mL | <3 | Yes | Yes |
| No  | Yes | ≥30 g/L | <5 ng/ml | <37 U/mL | <3 | Yes | No  |
| No  | Yes | ≥30 g/L | <5 ng/ml | <37 U/mL | <3 | Yes | No  |
| No  | Yes | ≥30 g/L | <5 ng/ml | <37 U/mL | <3 | No  | No  |
| Yes | Yes | ≥30 g/L | <5 ng/ml | <37 U/mL | <3 | No  | No  |
| Yes | No  | ≥30 g/L | ≥5 ng/ml | ≥37 U/mL | <3 | No  | No  |
| No  | Yes | ≥30 g/L | ≥5 ng/ml | <37 U/mL | <3 | No  | No  |
| No  | Yes | ≥30 g/L | <5 ng/ml | <37 U/mL | <3 | No  | No  |
| Yes | No  | ≥30 g/L | <5 ng/ml | ≥37 U/mL | <3 | No  | Yes |
| Yes | Yes | ≥30 g/L | <5 ng/ml | <37 U/mL | <3 | Yes | No  |
| No  | No  | ≥30 g/L | <5 ng/ml | <37 U/mL | <3 | Yes | No  |
| No  | Yes | ≥30 g/L | <5 ng/ml | ≥37 U/mL | <3 | Yes | Yes |
| Yes | Yes | ≥30 g/L | <5 ng/ml | <37 U/mL | <3 | Yes | No  |
| Yes | No  | ≥30 g/L | <5 ng/ml | ≥37 U/mL | <3 | No  | Yes |
| No  | No  | <30 g/L | <5 ng/ml | <37 U/mL | <3 | No  | No  |
| Yes | No  | ≥30 g/L | <5 ng/ml | <37 U/mL | <3 | No  | No  |
| No  | No  | ≥30 g/L | <5 ng/ml | <37 U/mL | <3 | No  | No  |
| No  | Yes | <30 g/L | <5 ng/ml | <37 U/mL | <3 | Yes | No  |
| No  | Yes | <30 g/L | <5 ng/ml | <37 U/mL | <3 | No  | No  |
| No  | No  | ≥30 g/L | <5 ng/ml | <37 U/mL | <3 | Yes | No  |
| No  | No  | <30 g/L | <5 ng/ml | <37 U/mL | <3 | Yes | No  |
| No  | Yes | ≥30 g/L | <5 ng/ml | <37 U/mL | <3 | No  | No  |
| No  | No  | ≥30 g/L | <5 ng/ml | <37 U/mL | <3 | No  | No  |
| No  | Yes | <30 g/L | <5 ng/ml | <37 U/mL | ≥3 | No  | Yes |
| No  | No  | ≥30 g/L | <5 ng/ml | <37 U/mL | ≥3 | Yes | No  |
| Yes | Yes | ≥30 g/L | <5 ng/ml | <37 U/mL | <3 | Yes | Yes |
| No  | Yes | ≥30 g/L | <5 ng/ml | <37 U/mL | ≥3 | No  | Yes |
| Yes | No  | ≥30 g/L | <5 ng/ml | <37 U/mL | ≥3 | Yes | No  |
| Yes | No  | ≥30 g/L | <5 ng/ml | <37 U/mL | <3 | No  | No  |
| No  | Yes | ≥30 g/L | <5 ng/ml | <37 U/mL | <3 | No  | Yes |
| No  | Yes | ≥30 g/L | <5 ng/ml | <37 U/mL | ≥3 | No  | No  |
| No  | Yes | ≥30 g/L | <5 ng/ml | <37 U/mL | ≥3 | No  | Yes |
| No  | No  | ≥30 g/L | <5 ng/ml | <37 U/mL | ≥3 | Yes | Yes |
| No  | No  | ≥30 g/L | ≥5 ng/ml | <37 U/mL | <3 | Yes | No  |
| No  | Yes | <30 g/L | ≥5 ng/ml | ≥37 U/mL | <3 | Yes | No  |
| Yes | Yes | <30 g/L | ≥5 ng/ml | ≥37 U/mL | <3 | No  | No  |
| No  | Yes | ≥30 g/L | <5 ng/ml | ≥37 U/mL | <3 | No  | No  |
| Yes | No  | <30 g/L | <5 ng/ml | <37 U/mL | <3 | No  | No  |
| Yes | No  | ≥30 g/L | <5 ng/ml | ≥37 U/mL | <3 | No  | No  |
| Yes | No  | ≥30 g/L | <5 ng/ml | ≥37 U/mL | <3 | No  | No  |
| No  | No  | <30 g/L | <5 ng/ml | ≥37 U/mL | <3 | Yes | No  |

|     |     |         |          |          |    |     |     |
|-----|-----|---------|----------|----------|----|-----|-----|
| No  | No  | <30 g/L | <5 ng/ml | <37 U/mL | <3 | No  | No  |
| No  | No  | ≥30 g/L | <5 ng/ml | <37 U/mL | <3 | Yes | Yes |
| No  | No  | <30 g/L | <5 ng/ml | <37 U/mL | <3 | No  | No  |
| No  | No  | <30 g/L | <5 ng/ml | <37 U/mL | <3 | Yes | No  |
| No  | No  | ≥30 g/L | <5 ng/ml | <37 U/mL | <3 | No  | No  |
| No  | No  | <30 g/L | <5 ng/ml | <37 U/mL | <3 | Yes | No  |
| No  | No  | ≥30 g/L | <5 ng/ml | <37 U/mL | <3 | Yes | No  |
| No  | No  | ≥30 g/L | <5 ng/ml | <37 U/mL | <3 | Yes | No  |
| No  | No  | ≥30 g/L | <5 ng/ml | <37 U/mL | <3 | No  | No  |
| No  | Yes | ≥30 g/L | <5 ng/ml | <37 U/mL | <3 | No  | No  |
| Yes | Yes | ≥30 g/L | <5 ng/ml | <37 U/mL | <3 | Yes | No  |
| Yes | Yes | ≥30 g/L | ≥5 ng/ml | <37 U/mL | <3 | Yes | Yes |
| No  | No  | ≥30 g/L | <5 ng/ml | <37 U/mL | <3 | Yes | No  |
| Yes | Yes | ≥30 g/L | <5 ng/ml | ≥37 U/mL | <3 | Yes | Yes |
| Yes | No  | ≥30 g/L | <5 ng/ml | <37 U/mL | <3 | No  | Yes |
| No  | No  | ≥30 g/L | <5 ng/ml | ≥37 U/mL | <3 | Yes | No  |
| No  | No  | ≥30 g/L | <5 ng/ml | <37 U/mL | <3 | Yes | Yes |
| Yes | No  | ≥30 g/L | <5 ng/ml | ≥37 U/mL | <3 | No  | No  |
| No  | No  | ≥30 g/L | ≥5 ng/ml | <37 U/mL | ≥3 | No  | Yes |
| No  | No  | ≥30 g/L | <5 ng/ml | ≥37 U/mL | ≥3 | No  | No  |
| No  | No  | ≥30 g/L | ≥5 ng/ml | ≥37 U/mL | <3 | No  | No  |
| No  | No  | ≥30 g/L | ≥5 ng/ml | ≥37 U/mL | ≥3 | No  | No  |
| No  | No  | ≥30 g/L | ≥5 ng/ml | <37 U/mL | ≥3 | Yes | Yes |
| No  | No  | ≥30 g/L | <5 ng/ml | <37 U/mL | <3 | Yes | No  |
| No  | Yes | <30 g/L | <5 ng/ml | <37 U/mL | <3 | Yes | No  |
| No  | No  | ≥30 g/L | <5 ng/ml | ≥37 U/mL | ≥3 | Yes | No  |
| No  | Yes | ≥30 g/L | <5 ng/ml | <37 U/mL | ≥3 | No  | No  |
| Yes | No  | ≥30 g/L | <5 ng/ml | ≥37 U/mL | ≥3 | No  | No  |
| No  | Yes | ≥30 g/L | ≥5 ng/ml | ≥37 U/mL | <3 | No  | No  |
| No  | No  | ≥30 g/L | ≥5 ng/ml | <37 U/mL | <3 | No  | No  |
| Yes | No  | <30 g/L | <5 ng/ml | <37 U/mL | <3 | Yes | No  |
| Yes | No  | ≥30 g/L | <5 ng/ml | <37 U/mL | <3 | No  | No  |
| Yes | No  | ≥30 g/L | <5 ng/ml | <37 U/mL | <3 | No  | Yes |
| Yes | No  | <30 g/L | <5 ng/ml | <37 U/mL | <3 | Yes | Yes |
| No  | No  | ≥30 g/L | <5 ng/ml | <37 U/mL | <3 | Yes | No  |
| No  | No  | ≥30 g/L | <5 ng/ml | <37 U/mL | <3 | Yes | Yes |
| No  | No  | <30 g/L | ≥5 ng/ml | <37 U/mL | <3 | Yes | No  |
| No  | No  | ≥30 g/L | <5 ng/ml | <37 U/mL | <3 | No  | Yes |
| No  | No  | ≥30 g/L | <5 ng/ml | <37 U/mL | <3 | Yes | No  |
| No  | No  | ≥30 g/L | ≥5 ng/ml | <37 U/mL | <3 | Yes | No  |
| No  | No  | ≥30 g/L | <5 ng/ml | <37 U/mL | <3 | Yes | Yes |
| No  | No  | ≥30 g/L | ≥5 ng/ml | <37 U/mL | <3 | Yes | No  |
| Yes | No  | ≥30 g/L | ≥5 ng/ml | <37 U/mL | <3 | Yes | No  |
| Yes | No  | ≥30 g/L | <5 ng/ml | ≥37 U/mL | <3 | No  | No  |
| No  | No  | ≥30 g/L | ≥5 ng/ml | <37 U/mL | <3 | No  | No  |
| Yes | No  | ≥30 g/L | <5 ng/ml | ≥37 U/mL | <3 | No  | No  |
| Yes | No  | ≥30 g/L | <5 ng/ml | <37 U/mL | <3 | No  | No  |
| No  | No  | ≥30 g/L | ≥5 ng/ml | <37 U/mL | <3 | No  | No  |
| Yes | No  | ≥30 g/L | <5 ng/ml | ≥37 U/mL | <3 | No  | No  |
| Yes | No  | ≥30 g/L | <5 ng/ml | <37 U/mL | <3 | No  | No  |
| No  | No  | ≥30 g/L | <5 ng/ml | ≥37 U/mL | <3 | No  | No  |

|     |     |         |          |          |    |     |     |
|-----|-----|---------|----------|----------|----|-----|-----|
| No  | No  | <30 g/L | <5 ng/ml | ≥37 U/mL | <3 | Yes | No  |
| No  | No  | ≥30 g/L | <5 ng/ml | ≥37 U/mL | <3 | No  | No  |
| Yes | No  | ≥30 g/L | <5 ng/ml | <37 U/mL | <3 | Yes | No  |
| Yes | No  | ≥30 g/L | <5 ng/ml | ≥37 U/mL | <3 | Yes | No  |
| No  | No  | <30 g/L | <5 ng/ml | <37 U/mL | <3 | No  | No  |
| No  | No  | ≥30 g/L | <5 ng/ml | <37 U/mL | <3 | Yes | Yes |
| Yes | Yes | <30 g/L | ≥5 ng/ml | ≥37 U/mL | <3 | Yes | Yes |
| No  | Yes | ≥30 g/L | <5 ng/ml | ≥37 U/mL | <3 | Yes | No  |
| No  | No  | ≥30 g/L | ≥5 ng/ml | ≥37 U/mL | <3 | Yes | No  |
| Yes | No  | <30 g/L | ≥5 ng/ml | ≥37 U/mL | <3 | No  | Yes |
| No  | No  | ≥30 g/L | <5 ng/ml | ≥37 U/mL | <3 | No  | No  |
| Yes | No  | ≥30 g/L | <5 ng/ml | <37 U/mL | <3 | No  | No  |
| No  | Yes | ≥30 g/L | <5 ng/ml | ≥37 U/mL | <3 | No  | No  |
| No  | No  | ≥30 g/L | <5 ng/ml | ≥37 U/mL | <3 | No  | No  |
| No  | No  | <30 g/L | <5 ng/ml | <37 U/mL | <3 | No  | No  |
| No  | No  | ≥30 g/L | <5 ng/ml | ≥37 U/mL | <3 | No  | No  |
| Yes | No  | ≥30 g/L | <5 ng/ml | <37 U/mL | <3 | Yes | No  |
| No  | No  | ≥30 g/L | <5 ng/ml | <37 U/mL | <3 | Yes | No  |
| No  | No  | ≥30 g/L | <5 ng/ml | <37 U/mL | <3 | No  | No  |
| No  | No  | ≥30 g/L | <5 ng/ml | <37 U/mL | <3 | No  | No  |
| No  | No  | ≥30 g/L | <5 ng/ml | ≥37 U/mL | <3 | No  | No  |
| No  | No  | ≥30 g/L | <5 ng/ml | ≥37 U/mL | <3 | No  | No  |
| No  | Yes | ≥30 g/L | <5 ng/ml | ≥37 U/mL | <3 | No  | No  |
| No  | Yes | ≥30 g/L | <5 ng/ml | <37 U/mL | <3 | Yes | Yes |
| Yes | No  | ≥30 g/L | <5 ng/ml | <37 U/mL | <3 | No  | No  |
| Yes | No  | ≥30 g/L | <5 ng/ml | ≥37 U/mL | <3 | No  | Yes |
| No  | No  | ≥30 g/L | <5 ng/ml | ≥37 U/mL | <3 | No  | No  |
| Yes | No  | ≥30 g/L | <5 ng/ml | <37 U/mL | <3 | No  | No  |
| No  | Yes | ≥30 g/L | ≥5 ng/ml | ≥37 U/mL | <3 | No  | No  |
| Yes | No  | ≥30 g/L | <5 ng/ml | <37 U/mL | <3 | No  | No  |
| Yes | Yes | ≥30 g/L | ≥5 ng/ml | <37 U/mL | <3 | No  | No  |
| Yes | No  | ≥30 g/L | <5 ng/ml | ≥37 U/mL | <3 | No  | No  |
| No  | Yes | ≥30 g/L | ≥5 ng/ml | ≥37 U/mL | <3 | No  | No  |
| No  | Yes | <30 g/L | ≥5 ng/ml | <37 U/mL | <3 | No  | Yes |
| No  | No  | <30 g/L | <5 ng/ml | <37 U/mL | ≥3 | No  | No  |
| No  | Yes | ≥30 g/L | <5 ng/ml | <37 U/mL | ≥3 | No  | No  |
| No  | No  | <30 g/L | <5 ng/ml | ≥37 U/mL | <3 | Yes | No  |
| No  | No  | ≥30 g/L | <5 ng/ml | ≥37 U/mL | ≥3 | Yes | Yes |
| No  | No  | ≥30 g/L | <5 ng/ml | <37 U/mL | ≥3 | Yes | No  |
| No  | No  | ≥30 g/L | <5 ng/ml | ≥37 U/mL | <3 | Yes | Yes |
| No  | No  | ≥30 g/L | <5 ng/ml | <37 U/mL | <3 | Yes | No  |
| No  | No  | ≥30 g/L | <5 ng/ml | <37 U/mL | ≥3 | No  | No  |
| No  | No  | ≥30 g/L | <5 ng/ml | <37 U/mL | ≥3 | No  | No  |
| No  | Yes | ≥30 g/L | <5 ng/ml | <37 U/mL | ≥3 | Yes | Yes |
| Yes | Yes | ≥30 g/L | <5 ng/ml | <37 U/mL | <3 | Yes | No  |
| No  | No  | ≥30 g/L | <5 ng/ml | <37 U/mL | <3 | No  | Yes |
| Yes | No  | ≥30 g/L | <5 ng/ml | <37 U/mL | <3 | No  | No  |
| Yes | No  | ≥30 g/L | <5 ng/ml | <37 U/mL | <3 | No  | No  |
| No  | Yes | ≥30 g/L | ≥5 ng/ml | <37 U/mL | <3 | No  | No  |
| No  | No  | ≥30 g/L | <5 ng/ml | <37 U/mL | <3 | No  | No  |
| No  | Yes | ≥30 g/L | ≥5 ng/ml | <37 U/mL | <3 | No  | No  |
| No  | Yes | <30 g/L | <5 ng/ml | <37 U/mL | <3 | No  | No  |
| No  | Yes | <30 g/L | <5 ng/ml | <37 U/mL | <3 | No  | No  |
| No  | No  | ≥30 g/L | ≥5 ng/ml | <37 U/mL | ≥3 | Yes | No  |

|     |     |         |          |          |    |     |     |
|-----|-----|---------|----------|----------|----|-----|-----|
| No  | No  | <30 g/L | <5 ng/ml | <37 U/mL | <3 | Yes | No  |
| No  | No  | <30 g/L | <5 ng/ml | ≥37 U/mL | <3 | No  | No  |
| No  | No  | ≥30 g/L | <5 ng/ml | <37 U/mL | <3 | No  | No  |
| No  | No  | <30 g/L | ≥5 ng/ml | <37 U/mL | <3 | No  | No  |
| No  | No  | ≥30 g/L | <5 ng/ml | <37 U/mL | ≥3 | No  | No  |
| Yes | No  | ≥30 g/L | <5 ng/ml | <37 U/mL | <3 | Yes | Yes |
| Yes | No  | ≥30 g/L | <5 ng/ml | <37 U/mL | <3 | No  | No  |
| No  | No  | ≥30 g/L | <5 ng/ml | <37 U/mL | <3 | No  | Yes |
| Yes | No  | ≥30 g/L | <5 ng/ml | <37 U/mL | <3 | Yes | No  |
| Yes | No  | ≥30 g/L | <5 ng/ml | <37 U/mL | ≥3 | No  | Yes |
| Yes | No  | ≥30 g/L | <5 ng/ml | <37 U/mL | <3 | No  | No  |
| Yes | No  | ≥30 g/L | <5 ng/ml | <37 U/mL | <3 | No  | No  |
| No  | No  | ≥30 g/L | <5 ng/ml | <37 U/mL | <3 | No  | No  |
| No  | No  | ≥30 g/L | <5 ng/ml | <37 U/mL | ≥3 | Yes | No  |
| No  | No  | ≥30 g/L | <5 ng/ml | <37 U/mL | ≥3 | Yes | No  |
| No  | Yes | ≥30 g/L | <5 ng/ml | <37 U/mL | <3 | No  | Yes |
| Yes | Yes | ≥30 g/L | <5 ng/ml | <37 U/mL | ≥3 | No  | Yes |
| Yes | No  | ≥30 g/L | <5 ng/ml | <37 U/mL | ≥3 | No  | No  |
| Yes | Yes | ≥30 g/L | <5 ng/ml | <37 U/mL | <3 | No  | No  |
| No  | Yes | ≥30 g/L | ≥5 ng/ml | <37 U/mL | <3 | No  | Yes |
| Yes | Yes | ≥30 g/L | ≥5 ng/ml | <37 U/mL | ≥3 | No  | No  |
| Yes | Yes | ≥30 g/L | ≥5 ng/ml | <37 U/mL | ≥3 | No  | No  |
| No  | No  | ≥30 g/L | <5 ng/ml | <37 U/mL | ≥3 | No  | No  |
| No  | No  | ≥30 g/L | <5 ng/ml | <37 U/mL | <3 | No  | No  |
| No  | No  | ≥30 g/L | ≥5 ng/ml | ≥37 U/mL | <3 | No  | Yes |
| No  | No  | ≥30 g/L | <5 ng/ml | ≥37 U/mL | <3 | No  | No  |
| No  | No  | ≥30 g/L | <5 ng/ml | ≥37 U/mL | <3 | Yes | No  |
| No  | No  | ≥30 g/L | ≥5 ng/ml | ≥37 U/mL | <3 | Yes | No  |
| No  | No  | ≥30 g/L | <5 ng/ml | <37 U/mL | <3 | No  | No  |
| No  | No  | <30 g/L | <5 ng/ml | <37 U/mL | ≥3 | No  | Yes |
| No  | No  | <30 g/L | <5 ng/ml | <37 U/mL | ≥3 | No  | No  |
| Yes | No  | ≥30 g/L | <5 ng/ml | <37 U/mL | <3 | No  | No  |
| Yes | Yes | <30 g/L | <5 ng/ml | <37 U/mL | ≥3 | Yes | No  |
| No  | No  | <30 g/L | <5 ng/ml | <37 U/mL | ≥3 | No  | Yes |
| No  | Yes | ≥30 g/L | <5 ng/ml | <37 U/mL | <3 | No  | No  |
| No  | Yes | <30 g/L | <5 ng/ml | <37 U/mL | <3 | No  | No  |
| No  | Yes | ≥30 g/L | <5 ng/ml | <37 U/mL | ≥3 | No  | No  |
| No  | Yes | ≥30 g/L | <5 ng/ml | <37 U/mL | ≥3 | No  | Yes |
| No  | No  | ≥30 g/L | <5 ng/ml | <37 U/mL | ≥3 | No  | Yes |
| No  | Yes | ≥30 g/L | <5 ng/ml | <37 U/mL | <3 | Yes | No  |
| No  | No  | ≥30 g/L | ≥5 ng/ml | <37 U/mL | <3 | Yes | Yes |
| No  | No  | ≥30 g/L | ≥5 ng/ml | <37 U/mL | ≥3 | Yes | No  |
| No  | No  | ≥30 g/L | ≥5 ng/ml | <37 U/mL | ≥3 | No  | No  |
| No  | No  | ≥30 g/L | <5 ng/ml | ≥37 U/mL | <3 | Yes | No  |
| No  | No  | ≥30 g/L | ≥5 ng/ml | ≥37 U/mL | ≥3 | Yes | No  |
| No  | No  | ≥30 g/L | ≥5 ng/ml | ≥37 U/mL | ≥3 | Yes | No  |
| No  | No  | <30 g/L | ≥5 ng/ml | ≥37 U/mL | <3 | Yes | No  |
| No  | No  | ≥30 g/L | <5 ng/ml | <37 U/mL | <3 | Yes | No  |
| Yes | No  | ≥30 g/L | <5 ng/ml | <37 U/mL | ≥3 | No  | Yes |
| No  | No  | ≥30 g/L | <5 ng/ml | <37 U/mL | ≥3 | Yes | Yes |
| Yes | Yes | ≥30 g/L | <5 ng/ml | <37 U/mL | <3 | No  | No  |
| Yes | No  | ≥30 g/L | <5 ng/ml | <37 U/mL | ≥3 | No  | No  |
| No  | No  | <30 g/L | <5 ng/ml | <37 U/mL | <3 | Yes | Yes |



|     |     |         |          |          |    |     |     |
|-----|-----|---------|----------|----------|----|-----|-----|
| Yes | No  | <30 g/L | <5 ng/ml | ≥37 U/mL | <3 | No  | Yes |
| No  | No  | ≥30 g/L | ≥5 ng/ml | ≥37 U/mL | ≥3 | No  | No  |
| Yes | Yes | ≥30 g/L | <5 ng/ml | <37 U/mL | <3 | No  | No  |
| Yes | Yes | ≥30 g/L | <5 ng/ml | <37 U/mL | <3 | No  | Yes |
| No  | Yes | <30 g/L | <5 ng/ml | ≥37 U/mL | ≥3 | Yes | No  |
| No  | No  | ≥30 g/L | <5 ng/ml | ≥37 U/mL | <3 | Yes | No  |
| No  | No  | ≥30 g/L | <5 ng/ml | ≥37 U/mL | <3 | Yes | Yes |
| No  | No  | ≥30 g/L | <5 ng/ml | <37 U/mL | ≥3 | Yes | No  |
| No  | No  | ≥30 g/L | <5 ng/ml | <37 U/mL | <3 | Yes | No  |
| No  | No  | ≥30 g/L | <5 ng/ml | <37 U/mL | <3 | Yes | No  |
| No  | No  | ≥30 g/L | <5 ng/ml | <37 U/mL | <3 | Yes | Yes |
| No  | No  | ≥30 g/L | <5 ng/ml | <37 U/mL | <3 | No  | No  |
| No  | No  | ≥30 g/L | <5 ng/ml | <37 U/mL | ≥3 | No  | No  |
| No  | No  | ≥30 g/L | <5 ng/ml | <37 U/mL | <3 | No  | Yes |
| Yes | No  | <30 g/L | <5 ng/ml | <37 U/mL | <3 | No  | Yes |
| No  | No  | ≥30 g/L | ≥5 ng/ml | <37 U/mL | <3 | No  | No  |
| Yes | No  | <30 g/L | <5 ng/ml | <37 U/mL | ≥3 | No  | Yes |
| No  | No  | ≥30 g/L | <5 ng/ml | <37 U/mL | <3 | No  | No  |
| No  | No  | ≥30 g/L | <5 ng/ml | <37 U/mL | <3 | No  | Yes |
| No  | No  | ≥30 g/L | <5 ng/ml | <37 U/mL | <3 | No  | Yes |
| Yes | No  | ≥30 g/L | <5 ng/ml | <37 U/mL | <3 | No  | No  |
| Yes | No  | ≥30 g/L | <5 ng/ml | <37 U/mL | ≥3 | No  | No  |
| Yes | No  | ≥30 g/L | <5 ng/ml | <37 U/mL | <3 | Yes | No  |
| No  | Yes | ≥30 g/L | <5 ng/ml | <37 U/mL | <3 | Yes | No  |
| No  | No  | ≥30 g/L | ≥5 ng/ml | <37 U/mL | <3 | No  | No  |
| No  | No  | ≥30 g/L | <5 ng/ml | <37 U/mL | <3 | Yes | No  |
| No  | No  | ≥30 g/L | ≥5 ng/ml | <37 U/mL | ≥3 | No  | No  |
| No  | Yes | ≥30 g/L | <5 ng/ml | <37 U/mL | ≥3 | No  | No  |
| No  | No  | <30 g/L | <5 ng/ml | <37 U/mL | ≥3 | Yes | Yes |
| No  | No  | <30 g/L | <5 ng/ml | ≥37 U/mL | ≥3 | No  | Yes |
| No  | Yes | ≥30 g/L | <5 ng/ml | <37 U/mL | ≥3 | No  | No  |
| No  | No  | <30 g/L | <5 ng/ml | <37 U/mL | <3 | No  | No  |
| No  | No  | <30 g/L | <5 ng/ml | ≥37 U/mL | <3 | Yes | No  |
| No  | No  | ≥30 g/L | <5 ng/ml | ≥37 U/mL | <3 | Yes | Yes |
| Yes | No  | ≥30 g/L | <5 ng/ml | ≥37 U/mL | <3 | No  | No  |
| No  | No  | ≥30 g/L | <5 ng/ml | <37 U/mL | <3 | No  | No  |
| No  | No  | ≥30 g/L | <5 ng/ml | ≥37 U/mL | <3 | No  | Yes |
| Yes | No  | ≥30 g/L | <5 ng/ml | <37 U/mL | <3 | No  | Yes |
| Yes | No  | ≥30 g/L | <5 ng/ml | ≥37 U/mL | <3 | No  | No  |
| No  | No  | ≥30 g/L | <5 ng/ml | ≥37 U/mL | ≥3 | No  | No  |
| Yes | No  | ≥30 g/L | <5 ng/ml | <37 U/mL | ≥3 | No  | Yes |
| Yes | No  | ≥30 g/L | ≥5 ng/ml | ≥37 U/mL | <3 | No  | No  |
| Yes | No  | ≥30 g/L | <5 ng/ml | ≥37 U/mL | <3 | No  | No  |
| No  | No  | ≥30 g/L | <5 ng/ml | ≥37 U/mL | <3 | No  | No  |
| No  | Yes | <30 g/L | <5 ng/ml | <37 U/mL | <3 | No  | Yes |
| No  | Yes | <30 g/L | <5 ng/ml | ≥37 U/mL | <3 | No  | No  |
| No  | No  | ≥30 g/L | ≥5 ng/ml | <37 U/mL | ≥3 | No  | Yes |
| No  | Yes | <30 g/L | ≥5 ng/ml | <37 U/mL | ≥3 | Yes | No  |
| No  | No  | <30 g/L | <5 ng/ml | <37 U/mL | ≥3 | Yes | No  |
| No  | No  | ≥30 g/L | <5 ng/ml | <37 U/mL | <3 | Yes | No  |
| No  | Yes | ≥30 g/L | <5 ng/ml | <37 U/mL | <3 | No  | No  |
| No  | Yes | ≥30 g/L | <5 ng/ml | <37 U/mL | <3 | No  | No  |
| No  | No  | ≥30 g/L | <5 ng/ml | <37 U/mL | <3 | Yes | No  |
| No  | No  | ≥30 g/L | <5 ng/ml | <37 U/mL | <3 | No  | No  |





|     |     |         |          |          |    |     |     |
|-----|-----|---------|----------|----------|----|-----|-----|
| No  | No  | <30 g/L | <5 ng/ml | ≥37 U/mL | <3 | No  | No  |
| No  | No  | ≥30 g/L | <5 ng/ml | ≥37 U/mL | <3 | No  | Yes |
| No  | No  | ≥30 g/L | <5 ng/ml | <37 U/mL | <3 | No  | No  |
| No  | No  | ≥30 g/L | <5 ng/ml | <37 U/mL | <3 | No  | No  |
| No  | No  | ≥30 g/L | <5 ng/ml | ≥37 U/mL | <3 | No  | No  |
| No  | Yes | ≥30 g/L | <5 ng/ml | <37 U/mL | ≥3 | Yes | Yes |
| Yes | Yes | ≥30 g/L | <5 ng/ml | <37 U/mL | <3 | Yes | No  |
| Yes | No  | ≥30 g/L | <5 ng/ml | <37 U/mL | <3 | Yes | No  |
| No  | Yes | ≥30 g/L | <5 ng/ml | <37 U/mL | <3 | No  | No  |
| No  | Yes | ≥30 g/L | <5 ng/ml | <37 U/mL | <3 | Yes | No  |
| No  | No  | ≥30 g/L | <5 ng/ml | <37 U/mL | ≥3 | No  | No  |
| No  | Yes | ≥30 g/L | <5 ng/ml | <37 U/mL | ≥3 | Yes | No  |
| No  | Yes | <30 g/L | <5 ng/ml | <37 U/mL | ≥3 | No  | Yes |
| No  | Yes | <30 g/L | <5 ng/ml | <37 U/mL | ≥3 | No  | No  |
| No  | No  | <30 g/L | <5 ng/ml | <37 U/mL | <3 | No  | Yes |
| No  | No  | <30 g/L | <5 ng/ml | <37 U/mL | <3 | No  | No  |
| No  | No  | ≥30 g/L | ≥5 ng/ml | ≥37 U/mL | <3 | No  | No  |
| Yes | No  | ≥30 g/L | <5 ng/ml | <37 U/mL | <3 | No  | No  |
| No  | No  | ≥30 g/L | <5 ng/ml | <37 U/mL | <3 | No  | Yes |
| No  | No  | ≥30 g/L | <5 ng/ml | <37 U/mL | <3 | No  | Yes |
| Yes | No  | ≥30 g/L | <5 ng/ml | <37 U/mL | <3 | No  | Yes |
| No  | No  | ≥30 g/L | <5 ng/ml | <37 U/mL | <3 | No  | No  |
| Yes | No  | ≥30 g/L | ≥5 ng/ml | ≥37 U/mL | <3 | No  | No  |
| No  | Yes | ≥30 g/L | <5 ng/ml | ≥37 U/mL | ≥3 | No  | No  |
| No  | No  | ≥30 g/L | <5 ng/ml | <37 U/mL | <3 | No  | No  |
| No  | Yes | <30 g/L | <5 ng/ml | ≥37 U/mL | <3 | No  | No  |
| Yes | No  | ≥30 g/L | ≥5 ng/ml | ≥37 U/mL | <3 | No  | No  |
| Yes | Yes | <30 g/L | ≥5 ng/ml | <37 U/mL | <3 | Yes | No  |
| No  | Yes | <30 g/L | ≥5 ng/ml | ≥37 U/mL | <3 | No  | No  |
| No  | Yes | <30 g/L | ≥5 ng/ml | <37 U/mL | <3 | No  | No  |
| No  | No  | <30 g/L | ≥5 ng/ml | ≥37 U/mL | <3 | No  | No  |
| No  | No  | ≥30 g/L | <5 ng/ml | ≥37 U/mL | ≥3 | No  | No  |
| Yes | No  | <30 g/L | <5 ng/ml | <37 U/mL | <3 | No  | Yes |
| Yes | No  | <30 g/L | <5 ng/ml | <37 U/mL | <3 | No  | No  |
| No  | No  | ≥30 g/L | <5 ng/ml | <37 U/mL | <3 | No  | No  |
| No  | No  | ≥30 g/L | <5 ng/ml | ≥37 U/mL | <3 | Yes | Yes |
| No  | No  | ≥30 g/L | <5 ng/ml | <37 U/mL | ≥3 | No  | Yes |
| No  | No  | ≥30 g/L | <5 ng/ml | ≥37 U/mL | ≥3 | No  | No  |
| No  | No  | ≥30 g/L | <5 ng/ml | <37 U/mL | ≥3 | Yes | No  |
| No  | Yes | ≥30 g/L | <5 ng/ml | ≥37 U/mL | <3 | No  | No  |
| No  | Yes | ≥30 g/L | <5 ng/ml | ≥37 U/mL | <3 | No  | No  |
| No  | No  | <30 g/L | <5 ng/ml | <37 U/mL | <3 | No  | No  |
| No  | No  | <30 g/L | <5 ng/ml | <37 U/mL | <3 | No  | No  |
| Yes | Yes | ≥30 g/L | <5 ng/ml | ≥37 U/mL | <3 | No  | No  |
| Yes | Yes | ≥30 g/L | <5 ng/ml | ≥37 U/mL | <3 | No  | No  |
| Yes | No  | <30 g/L | <5 ng/ml | ≥37 U/mL | <3 | No  | No  |
| Yes | No  | ≥30 g/L | ≥5 ng/ml | ≥37 U/mL | <3 | No  | No  |
| Yes | No  | <30 g/L | <5 ng/ml | <37 U/mL | <3 | No  | No  |
| No  | No  | <30 g/L | ≥5 ng/ml | ≥37 U/mL | <3 | No  | Yes |
| No  | No  | ≥30 g/L | <5 ng/ml | ≥37 U/mL | <3 | Yes | No  |
| No  | No  | ≥30 g/L | ≥5 ng/ml | <37 U/mL | <3 | No  | Yes |
| No  | No  | ≥30 g/L | ≥5 ng/ml | ≥37 U/mL | ≥3 | No  | Yes |
| No  | No  | ≥30 g/L | ≥5 ng/ml | <37 U/mL | ≥3 | Yes | No  |

|     |     |               |                |                |          |     |     |
|-----|-----|---------------|----------------|----------------|----------|-----|-----|
| No  | No  | $\geq 30$ g/L | $\geq 5$ ng/ml | $< 37$ U/mL    | $\geq 3$ | No  | Yes |
| No  | No  | $\geq 30$ g/L | $< 5$ ng/ml    | $< 37$ U/mL    | $\geq 3$ | Yes | Yes |
| No  | No  | $\geq 30$ g/L | $\geq 5$ ng/ml | $\geq 37$ U/mL | $\geq 3$ | No  | No  |
| No  | No  | $\geq 30$ g/L | $\geq 5$ ng/ml | $< 37$ U/mL    | $\geq 3$ | No  | No  |
| No  | No  | $\geq 30$ g/L | $\geq 5$ ng/ml | $< 37$ U/mL    | $\geq 3$ | Yes | Yes |
| No  | No  | $< 30$ g/L    | $< 5$ ng/ml    | $< 37$ U/mL    | $< 3$    | Yes | Yes |
| No  | No  | $< 30$ g/L    | $< 5$ ng/ml    | $< 37$ U/mL    | $< 3$    | Yes | No  |
| Yes | Yes | $< 30$ g/L    | $< 5$ ng/ml    | $< 37$ U/mL    | $< 3$    | Yes | No  |
| Yes | Yes | $< 30$ g/L    | $< 5$ ng/ml    | $< 37$ U/mL    | $< 3$    | No  | No  |
| No  | No  | $\geq 30$ g/L | $< 5$ ng/ml    | $< 37$ U/mL    | $< 3$    | No  | No  |
| No  | Yes | $\geq 30$ g/L | $< 5$ ng/ml    | $< 37$ U/mL    | $< 3$    | No  | No  |
| No  | Yes | $\geq 30$ g/L | $< 5$ ng/ml    | $\geq 37$ U/mL | $< 3$    | No  | No  |
| Yes | Yes | $< 30$ g/L    | $< 5$ ng/ml    | $< 37$ U/mL    | $< 3$    | No  | No  |
| Yes | No  | $< 30$ g/L    | $< 5$ ng/ml    | $< 37$ U/mL    | $< 3$    | No  | No  |
| No  | No  | $\geq 30$ g/L | $< 5$ ng/ml    | $\geq 37$ U/mL | $< 3$    | No  | Yes |
| No  | No  | $< 30$ g/L    | $< 5$ ng/ml    | $\geq 37$ U/mL | $< 3$    | No  | Yes |
| No  | No  | $\geq 30$ g/L | $< 5$ ng/ml    | $\geq 37$ U/mL | $< 3$    | No  | Yes |
| Yes | No  | $\geq 30$ g/L | $< 5$ ng/ml    | $\geq 37$ U/mL | $\geq 3$ | No  | Yes |
| No  | No  | $\geq 30$ g/L | $\geq 5$ ng/ml | $< 37$ U/mL    | $< 3$    | No  | No  |
| No  | No  | $\geq 30$ g/L | $\geq 5$ ng/ml | $< 37$ U/mL    | $\geq 3$ | No  | No  |
| No  | No  | $\geq 30$ g/L | $< 5$ ng/ml    | $\geq 37$ U/mL | $< 3$    | Yes | No  |
| No  | No  | $\geq 30$ g/L | $< 5$ ng/ml    | $\geq 37$ U/mL | $< 3$    | No  | Yes |
| No  | No  | $\geq 30$ g/L | $< 5$ ng/ml    | $< 37$ U/mL    | $< 3$    | Yes | No  |
| No  | Yes | $\geq 30$ g/L | $\geq 5$ ng/ml | $< 37$ U/mL    | $\geq 3$ | No  | No  |
| No  | Yes | $< 30$ g/L    | $\geq 5$ ng/ml | $< 37$ U/mL    | $\geq 3$ | No  | No  |
| No  | No  | $\geq 30$ g/L | $< 5$ ng/ml    | $< 37$ U/mL    | $\geq 3$ | Yes | Yes |
| No  | No  | $\geq 30$ g/L | $< 5$ ng/ml    | $< 37$ U/mL    | $< 3$    | No  | Yes |
| No  | Yes | $< 30$ g/L    | $\geq 5$ ng/ml | $< 37$ U/mL    | $< 3$    | No  | No  |
| No  | Yes | $< 30$ g/L    | $\geq 5$ ng/ml | $< 37$ U/mL    | $< 3$    | No  | No  |
| No  | No  | $\geq 30$ g/L | $< 5$ ng/ml    | $\geq 37$ U/mL | $< 3$    | No  | No  |
| No  | No  | $\geq 30$ g/L | $< 5$ ng/ml    | $\geq 37$ U/mL | $\geq 3$ | No  | No  |
| No  | Yes | $\geq 30$ g/L | $\geq 5$ ng/ml | $\geq 37$ U/mL | $< 3$    | No  | No  |
| No  | Yes | $\geq 30$ g/L | $< 5$ ng/ml    | $\geq 37$ U/mL | $< 3$    | No  | No  |
| Yes | No  | $\geq 30$ g/L | $\geq 5$ ng/ml | $< 37$ U/mL    | $\geq 3$ | No  | No  |
| No  | No  | $\geq 30$ g/L | $\geq 5$ ng/ml | $< 37$ U/mL    | $< 3$    | No  | No  |
| Yes | No  | $\geq 30$ g/L | $< 5$ ng/ml    | $< 37$ U/mL    | $< 3$    | No  | No  |
| No  | No  | $\geq 30$ g/L | $< 5$ ng/ml    | $< 37$ U/mL    | $\geq 3$ | No  | No  |
| Yes | No  | $\geq 30$ g/L | $\geq 5$ ng/ml | $< 37$ U/mL    | $\geq 3$ | No  | No  |
| Yes | No  | $\geq 30$ g/L | $\geq 5$ ng/ml | $< 37$ U/mL    | $< 3$    | No  | No  |
| No  | No  | $\geq 30$ g/L | $\geq 5$ ng/ml | $< 37$ U/mL    | $< 3$    | No  | Yes |
| Yes | No  | $\geq 30$ g/L | $\geq 5$ ng/ml | $< 37$ U/mL    | $\geq 3$ | No  | Yes |
| No  | No  | $< 30$ g/L    | $\geq 5$ ng/ml | $< 37$ U/mL    | $\geq 3$ | No  | Yes |
| Yes | No  | $< 30$ g/L    | $\geq 5$ ng/ml | $< 37$ U/mL    | $\geq 3$ | No  | Yes |
| No  | No  | $\geq 30$ g/L | $< 5$ ng/ml    | $< 37$ U/mL    | $\geq 3$ | No  | No  |
| Yes | No  | $< 30$ g/L    | $< 5$ ng/ml    | $< 37$ U/mL    | $< 3$    | Yes | Yes |
| No  | No  | $< 30$ g/L    | $\geq 5$ ng/ml | $< 37$ U/mL    | $< 3$    | Yes | No  |
| No  | No  | $\geq 30$ g/L | $< 5$ ng/ml    | $< 37$ U/mL    | $< 3$    | No  | Yes |
| No  | Yes | $< 30$ g/L    | $\geq 5$ ng/ml | $< 37$ U/mL    | $< 3$    | No  | No  |
| No  | No  | $\geq 30$ g/L | $\geq 5$ ng/ml | $< 37$ U/mL    | $\geq 3$ | Yes | No  |
| No  | Yes | $\geq 30$ g/L | $\geq 5$ ng/ml | $< 37$ U/mL    | $< 3$    | Yes | No  |
| No  | No  | $\geq 30$ g/L | $\geq 5$ ng/ml | $< 37$ U/mL    | $< 3$    | No  | No  |
| No  | No  | $\geq 30$ g/L | $< 5$ ng/ml    | $\geq 37$ U/mL | $< 3$    | Yes | No  |



|     |     |               |                |                |          |     |     |
|-----|-----|---------------|----------------|----------------|----------|-----|-----|
| No  | No  | $\geq 30$ g/L | $< 5$ ng/ml    | $\geq 37$ U/mL | $\geq 3$ | No  | Yes |
| No  | No  | $\geq 30$ g/L | $< 5$ ng/ml    | $\geq 37$ U/mL | $\geq 3$ | No  | Yes |
| Yes | No  | $\geq 30$ g/L | $\geq 5$ ng/ml | $< 37$ U/mL    | $\geq 3$ | No  | Yes |
| Yes | No  | $\geq 30$ g/L | $\geq 5$ ng/ml | $< 37$ U/mL    | $< 3$    | No  | No  |
| No  | No  | $< 30$ g/L    | $\geq 5$ ng/ml | $\geq 37$ U/mL | $< 3$    | No  | Yes |
| No  | No  | $< 30$ g/L    | $< 5$ ng/ml    | $\geq 37$ U/mL | $< 3$    | No  | No  |
| No  | No  | $\geq 30$ g/L | $\geq 5$ ng/ml | $\geq 37$ U/mL | $< 3$    | Yes | No  |
| No  | No  | $< 30$ g/L    | $< 5$ ng/ml    | $\geq 37$ U/mL | $< 3$    | No  | Yes |
| No  | No  | $< 30$ g/L    | $< 5$ ng/ml    | $< 37$ U/mL    | $\geq 3$ | Yes | No  |
| No  | Yes | $\geq 30$ g/L | $\geq 5$ ng/ml | $\geq 37$ U/mL | $< 3$    | Yes | Yes |
| No  | Yes | $< 30$ g/L    | $\geq 5$ ng/ml | $\geq 37$ U/mL | $< 3$    | Yes | No  |
| Yes | No  | $\geq 30$ g/L | $\geq 5$ ng/ml | $\geq 37$ U/mL | $< 3$    | No  | No  |
| Yes | No  | $< 30$ g/L    | $\geq 5$ ng/ml | $< 37$ U/mL    | $< 3$    | Yes | No  |
| No  | Yes | $\geq 30$ g/L | $< 5$ ng/ml    | $< 37$ U/mL    | $< 3$    | No  | No  |
| No  | No  | $< 30$ g/L    | $< 5$ ng/ml    | $< 37$ U/mL    | $< 3$    | No  | No  |
| Yes | Yes | $< 30$ g/L    | $< 5$ ng/ml    | $< 37$ U/mL    | $\geq 3$ | No  | No  |
| Yes | No  | $\geq 30$ g/L | $\geq 5$ ng/ml | $< 37$ U/mL    | $\geq 3$ | No  | No  |
| Yes | No  | $\geq 30$ g/L | $< 5$ ng/ml    | $< 37$ U/mL    | $\geq 3$ | No  | No  |
| Yes | Yes | $\geq 30$ g/L | $\geq 5$ ng/ml | $< 37$ U/mL    | $\geq 3$ | No  | Yes |
| No  | No  | $\geq 30$ g/L | $\geq 5$ ng/ml | $< 37$ U/mL    | $< 3$    | No  | Yes |
| No  | No  | $< 30$ g/L    | $< 5$ ng/ml    | $< 37$ U/mL    | $< 3$    | No  | Yes |
| Yes | No  | $\geq 30$ g/L | $\geq 5$ ng/ml | $< 37$ U/mL    | $< 3$    | No  | No  |
| No  | No  | $< 30$ g/L    | $< 5$ ng/ml    | $< 37$ U/mL    | $< 3$    | No  | No  |
| No  | No  | $\geq 30$ g/L | $\geq 5$ ng/ml | $< 37$ U/mL    | $< 3$    | No  | Yes |
| No  | No  | $< 30$ g/L    | $< 5$ ng/ml    | $< 37$ U/mL    | $< 3$    | No  | No  |
| No  | No  | $\geq 30$ g/L | $\geq 5$ ng/ml | $< 37$ U/mL    | $\geq 3$ | No  | No  |
| No  | No  | $\geq 30$ g/L | $\geq 5$ ng/ml | $< 37$ U/mL    | $\geq 3$ | No  | No  |
| No  | No  | $< 30$ g/L    | $< 5$ ng/ml    | $< 37$ U/mL    | $\geq 3$ | No  | No  |
| No  | No  | $\geq 30$ g/L | $\geq 5$ ng/ml | $\geq 37$ U/mL | $< 3$    | No  | Yes |
| No  | No  | $\geq 30$ g/L | $< 5$ ng/ml    | $< 37$ U/mL    | $< 3$    | No  | Yes |
| No  | No  | $\geq 30$ g/L | $< 5$ ng/ml    | $< 37$ U/mL    | $< 3$    | No  | No  |
| No  | Yes | $\geq 30$ g/L | $< 5$ ng/ml    | $\geq 37$ U/mL | $< 3$    | No  | Yes |
| No  | No  | $\geq 30$ g/L | $< 5$ ng/ml    | $\geq 37$ U/mL | $\geq 3$ | No  | Yes |
| Yes | Yes | $< 30$ g/L    | $\geq 5$ ng/ml | $\geq 37$ U/mL | $< 3$    | No  | Yes |
| Yes | Yes | $< 30$ g/L    | $\geq 5$ ng/ml | $< 37$ U/mL    | $< 3$    | Yes | No  |
| No  | No  | $< 30$ g/L    | $< 5$ ng/ml    | $\geq 37$ U/mL | $< 3$    | No  | Yes |
| Yes | No  | $\geq 30$ g/L | $< 5$ ng/ml    | $< 37$ U/mL    | $\geq 3$ | Yes | Yes |
| No  | Yes | $\geq 30$ g/L | $< 5$ ng/ml    | $< 37$ U/mL    | $\geq 3$ | No  | No  |
| No  | No  | $\geq 30$ g/L | $< 5$ ng/ml    | $< 37$ U/mL    | $\geq 3$ | No  | No  |
| No  | No  | $\geq 30$ g/L | $< 5$ ng/ml    | $< 37$ U/mL    | $< 3$    | No  | No  |
| No  | No  | $< 30$ g/L    | $< 5$ ng/ml    | $\geq 37$ U/mL | $< 3$    | No  | No  |
| No  | No  | $\geq 30$ g/L | $< 5$ ng/ml    | $\geq 37$ U/mL | $< 3$    | No  | No  |
| No  | No  | $\geq 30$ g/L | $< 5$ ng/ml    | $\geq 37$ U/mL | $< 3$    | No  | No  |
| No  | No  | $\geq 30$ g/L | $< 5$ ng/ml    | $< 37$ U/mL    | $\geq 3$ | No  | No  |
| No  | No  | $< 30$ g/L    | $< 5$ ng/ml    | $< 37$ U/mL    | $\geq 3$ | No  | No  |
| No  | No  | $< 30$ g/L    | $\geq 5$ ng/ml | $< 37$ U/mL    | $\geq 3$ | Yes | No  |
| No  | No  | $< 30$ g/L    | $< 5$ ng/ml    | $< 37$ U/mL    | $< 3$    | Yes | No  |
| No  | No  | $\geq 30$ g/L | $< 5$ ng/ml    | $< 37$ U/mL    | $< 3$    | Yes | Yes |
| No  | No  | $\geq 30$ g/L | $\geq 5$ ng/ml | $< 37$ U/mL    | $< 3$    | No  | No  |
| No  | No  | $\geq 30$ g/L | $< 5$ ng/ml    | $\geq 37$ U/mL | $< 3$    | No  | No  |
| Yes | No  | $\geq 30$ g/L | $< 5$ ng/ml    | $\geq 37$ U/mL | $< 3$    | No  | No  |
| No  | No  | $< 30$ g/L    | $\geq 5$ ng/ml | $\geq 37$ U/mL | $< 3$    | No  | Yes |
| Yes | No  | $< 30$ g/L    | $< 5$ ng/ml    | $\geq 37$ U/mL | $< 3$    | Yes | No  |
| Yes | No  | $< 30$ g/L    | $\geq 5$ ng/ml | $< 37$ U/mL    | $< 3$    | Yes | No  |

|     |     |               |                |                |          |     |     |
|-----|-----|---------------|----------------|----------------|----------|-----|-----|
| No  | No  | $\geq 30$ g/L | $< 5$ ng/ml    | $< 37$ U/mL    | $< 3$    | No  | Yes |
| No  | Yes | $\geq 30$ g/L | $\geq 5$ ng/ml | $\geq 37$ U/mL | $< 3$    | No  | No  |
| No  | No  | $\geq 30$ g/L | $\geq 5$ ng/ml | $< 37$ U/mL    | $\geq 3$ | No  | Yes |
| Yes | Yes | $\geq 30$ g/L | $\geq 5$ ng/ml | $\geq 37$ U/mL | $\geq 3$ | No  | Yes |
| No  | Yes | $\geq 30$ g/L | $\geq 5$ ng/ml | $< 37$ U/mL    | $\geq 3$ | No  | No  |
| No  | Yes | $< 30$ g/L    | $\geq 5$ ng/ml | $< 37$ U/mL    | $< 3$    | No  | Yes |
| No  | Yes | $\geq 30$ g/L | $\geq 5$ ng/ml | $< 37$ U/mL    | $< 3$    | No  | No  |
| No  | No  | $< 30$ g/L    | $< 5$ ng/ml    | $< 37$ U/mL    | $< 3$    | No  | No  |
| No  | No  | $\geq 30$ g/L | $\geq 5$ ng/ml | $< 37$ U/mL    | $< 3$    | No  | No  |
| No  | No  | $< 30$ g/L    | $< 5$ ng/ml    | $< 37$ U/mL    | $< 3$    | No  | No  |
| No  | No  | $\geq 30$ g/L | $\geq 5$ ng/ml | $\geq 37$ U/mL | $< 3$    | Yes | Yes |
| No  | No  | $\geq 30$ g/L | $< 5$ ng/ml    | $\geq 37$ U/mL | $\geq 3$ | Yes | No  |
| No  | No  | $< 30$ g/L    | $\geq 5$ ng/ml | $< 37$ U/mL    | $\geq 3$ | No  | No  |
| No  | No  | $\geq 30$ g/L | $\geq 5$ ng/ml | $< 37$ U/mL    | $\geq 3$ | Yes | No  |
| No  | No  | $\geq 30$ g/L | $< 5$ ng/ml    | $< 37$ U/mL    | $\geq 3$ | No  | No  |
| No  | No  | $\geq 30$ g/L | $< 5$ ng/ml    | $< 37$ U/mL    | $\geq 3$ | No  | No  |
| Yes | Yes | $\geq 30$ g/L | $< 5$ ng/ml    | $< 37$ U/mL    | $\geq 3$ | Yes | Yes |
| Yes | Yes | $\geq 30$ g/L | $\geq 5$ ng/ml | $< 37$ U/mL    | $\geq 3$ | Yes | No  |
| Yes | No  | $\geq 30$ g/L | $< 5$ ng/ml    | $< 37$ U/mL    | $\geq 3$ | Yes | No  |
| Yes | Yes | $\geq 30$ g/L | $\geq 5$ ng/ml | $\geq 37$ U/mL | $< 3$    | No  | Yes |
| No  | No  | $< 30$ g/L    | $\geq 5$ ng/ml | $\geq 37$ U/mL | $< 3$    | No  | No  |
| Yes | Yes | $< 30$ g/L    | $\geq 5$ ng/ml | $< 37$ U/mL    | $< 3$    | No  | No  |
| Yes | No  | $< 30$ g/L    | $\geq 5$ ng/ml | $< 37$ U/mL    | $< 3$    | No  | Yes |
| No  | No  | $\geq 30$ g/L | $< 5$ ng/ml    | $< 37$ U/mL    | $\geq 3$ | No  | No  |
| No  | Yes | $\geq 30$ g/L | $\geq 5$ ng/ml | $< 37$ U/mL    | $< 3$    | No  | Yes |
| No  | Yes | $\geq 30$ g/L | $\geq 5$ ng/ml | $< 37$ U/mL    | $< 3$    | No  | No  |
| No  | No  | $\geq 30$ g/L | $\geq 5$ ng/ml | $< 37$ U/mL    | $< 3$    | No  | Yes |
| No  | No  | $< 30$ g/L    | $< 5$ ng/ml    | $< 37$ U/mL    | $< 3$    | No  | Yes |
| No  | No  | $\geq 30$ g/L | $\geq 5$ ng/ml | $< 37$ U/mL    | $< 3$    | No  | No  |
| No  | No  | $\geq 30$ g/L | $< 5$ ng/ml    | $< 37$ U/mL    | $< 3$    | No  | Yes |
| No  | No  | $\geq 30$ g/L | $< 5$ ng/ml    | $< 37$ U/mL    | $< 3$    | No  | No  |
| No  | No  | $< 30$ g/L    | $< 5$ ng/ml    | $< 37$ U/mL    | $\geq 3$ | No  | Yes |
| No  | Yes | $< 30$ g/L    | $< 5$ ng/ml    | $< 37$ U/mL    | $< 3$    | No  | No  |
| No  | Yes | $< 30$ g/L    | $\geq 5$ ng/ml | $< 37$ U/mL    | $< 3$    | No  | No  |
| No  | No  | $\geq 30$ g/L | $\geq 5$ ng/ml | $< 37$ U/mL    | $< 3$    | Yes | No  |
| No  | No  | $\geq 30$ g/L | $< 5$ ng/ml    | $< 37$ U/mL    | $\geq 3$ | Yes | No  |
| Yes | Yes | $\geq 30$ g/L | $\geq 5$ ng/ml | $< 37$ U/mL    | $< 3$    | Yes | No  |
| Yes | Yes | $\geq 30$ g/L | $< 5$ ng/ml    | $< 37$ U/mL    | $< 3$    | No  | No  |
| No  | Yes | $< 30$ g/L    | $\geq 5$ ng/ml | $\geq 37$ U/mL | $< 3$    | No  | No  |
| No  | No  | $< 30$ g/L    | $\geq 5$ ng/ml | $< 37$ U/mL    | $< 3$    | Yes | No  |
| No  | No  | $< 30$ g/L    | $< 5$ ng/ml    | $< 37$ U/mL    | $< 3$    | Yes | No  |
| Yes | No  | $\geq 30$ g/L | $< 5$ ng/ml    | $< 37$ U/mL    | $< 3$    | No  | No  |
| Yes | No  | $\geq 30$ g/L | $\geq 5$ ng/ml | $< 37$ U/mL    | $< 3$    | No  | No  |
| Yes | No  | $\geq 30$ g/L | $< 5$ ng/ml    | $\geq 37$ U/mL | $< 3$    | No  | No  |
| No  | No  | $< 30$ g/L    | $< 5$ ng/ml    | $< 37$ U/mL    | $< 3$    | No  | No  |
| No  | No  | $< 30$ g/L    | $< 5$ ng/ml    | $\geq 37$ U/mL | $< 3$    | Yes | Yes |
| No  | No  | $< 30$ g/L    | $< 5$ ng/ml    | $\geq 37$ U/mL | $< 3$    | No  | No  |
| No  | No  | $\geq 30$ g/L | $< 5$ ng/ml    | $\geq 37$ U/mL | $< 3$    | No  | No  |
| No  | No  | $\geq 30$ g/L | $< 5$ ng/ml    | $< 37$ U/mL    | $< 3$    | No  | Yes |
| No  | No  | $\geq 30$ g/L | $< 5$ ng/ml    | $\geq 37$ U/mL | $< 3$    | No  | No  |
| No  | Yes | $\geq 30$ g/L | $< 5$ ng/ml    | $\geq 37$ U/mL | $\geq 3$ | Yes | Yes |

|     |     |         |          |          |    |     |     |
|-----|-----|---------|----------|----------|----|-----|-----|
| No  | Yes | <30 g/L | <5 ng/ml | <37 U/mL | ≥3 | Yes | No  |
| No  | No  | ≥30 g/L | <5 ng/ml | <37 U/mL | ≥3 | No  | No  |
| No  | No  | ≥30 g/L | ≥5 ng/ml | <37 U/mL | <3 | No  | No  |
| No  | Yes | ≥30 g/L | ≥5 ng/ml | <37 U/mL | <3 | No  | Yes |
| No  | No  | <30 g/L | ≥5 ng/ml | <37 U/mL | <3 | No  | No  |
| Yes | No  | <30 g/L | <5 ng/ml | <37 U/mL | <3 | No  | No  |
| No  | No  | <30 g/L | <5 ng/ml | <37 U/mL | <3 | No  | Yes |
| Yes | Yes | ≥30 g/L | ≥5 ng/ml | <37 U/mL | <3 | No  | Yes |
| No  | Yes | ≥30 g/L | <5 ng/ml | ≥37 U/mL | <3 | No  | No  |
| No  | Yes | ≥30 g/L | ≥5 ng/ml | <37 U/mL | <3 | No  | No  |
| Yes | No  | ≥30 g/L | ≥5 ng/ml | <37 U/mL | <3 | No  | No  |
| Yes | Yes | <30 g/L | <5 ng/ml | <37 U/mL | <3 | No  | Yes |
| No  | Yes | <30 g/L | ≥5 ng/ml | <37 U/mL | <3 | No  | Yes |
| No  | Yes | <30 g/L | ≥5 ng/ml | <37 U/mL | <3 | Yes | Yes |
| No  | Yes | ≥30 g/L | <5 ng/ml | <37 U/mL | <3 | Yes | No  |
| Yes | No  | ≥30 g/L | <5 ng/ml | <37 U/mL | <3 | No  | No  |
| No  | No  | ≥30 g/L | <5 ng/ml | <37 U/mL | ≥3 | Yes | No  |
| No  | No  | ≥30 g/L | ≥5 ng/ml | ≥37 U/mL | <3 | No  | Yes |
| No  | Yes | ≥30 g/L | ≥5 ng/ml | <37 U/mL | <3 | Yes | Yes |
| No  | Yes | ≥30 g/L | <5 ng/ml | ≥37 U/mL | <3 | No  | No  |
| No  | Yes | ≥30 g/L | ≥5 ng/ml | ≥37 U/mL | ≥3 | Yes | No  |
| No  | No  | ≥30 g/L | <5 ng/ml | <37 U/mL | ≥3 | Yes | No  |
| No  | No  | ≥30 g/L | ≥5 ng/ml | <37 U/mL | ≥3 | No  | No  |
| No  | No  | <30 g/L | ≥5 ng/ml | ≥37 U/mL | ≥3 | No  | No  |
| No  | No  | <30 g/L | ≥5 ng/ml | <37 U/mL | <3 | No  | No  |
| No  | Yes | <30 g/L | <5 ng/ml | <37 U/mL | <3 | No  | No  |
| No  | Yes | ≥30 g/L | ≥5 ng/ml | <37 U/mL | <3 | No  | No  |
| No  | Yes | ≥30 g/L | ≥5 ng/ml | <37 U/mL | <3 | No  | No  |
| No  | No  | ≥30 g/L | <5 ng/ml | <37 U/mL | <3 | No  | Yes |
| No  | No  | ≥30 g/L | <5 ng/ml | <37 U/mL | ≥3 | No  | Yes |
| No  | Yes | <30 g/L | <5 ng/ml | <37 U/mL | <3 | No  | No  |
| Yes | No  | ≥30 g/L | <5 ng/ml | <37 U/mL | <3 | No  | Yes |
| No  | No  | ≥30 g/L | <5 ng/ml | <37 U/mL | <3 | No  | No  |
| No  | No  | ≥30 g/L | ≥5 ng/ml | <37 U/mL | <3 | No  | No  |
| No  | No  | <30 g/L | ≥5 ng/ml | <37 U/mL | <3 | No  | No  |
| Yes | No  | <30 g/L | <5 ng/ml | <37 U/mL | <3 | No  | No  |
| No  | No  | <30 g/L | <5 ng/ml | <37 U/mL | ≥3 | Yes | Yes |
| No  | No  | ≥30 g/L | ≥5 ng/ml | ≥37 U/mL | ≥3 | Yes | No  |
| No  | Yes | ≥30 g/L | <5 ng/ml | ≥37 U/mL | ≥3 | Yes | No  |
| No  | Yes | ≥30 g/L | ≥5 ng/ml | <37 U/mL | ≥3 | Yes | No  |
| No  | No  | ≥30 g/L | ≥5 ng/ml | ≥37 U/mL | <3 | No  | Yes |
| No  | Yes | <30 g/L | ≥5 ng/ml | ≥37 U/mL | <3 | Yes | Yes |
| No  | No  | <30 g/L | ≥5 ng/ml | <37 U/mL | <3 | Yes | No  |
| No  | No  | <30 g/L | <5 ng/ml | <37 U/mL | <3 | No  | No  |
| No  | Yes | ≥30 g/L | ≥5 ng/ml | <37 U/mL | <3 | No  | Yes |
| No  | No  | ≥30 g/L | <5 ng/ml | <37 U/mL | <3 | No  | Yes |
| No  | No  | ≥30 g/L | <5 ng/ml | <37 U/mL | ≥3 | No  | Yes |
| Yes | No  | ≥30 g/L | <5 ng/ml | ≥37 U/mL | ≥3 | No  | No  |
| Yes | No  | <30 g/L | <5 ng/ml | <37 U/mL | <3 | No  | Yes |
| No  | No  | ≥30 g/L | <5 ng/ml | <37 U/mL | <3 | No  | Yes |
| Yes | Yes | <30 g/L | <5 ng/ml | ≥37 U/mL | <3 | No  | No  |
| Yes | No  | ≥30 g/L | <5 ng/ml | <37 U/mL | <3 | No  | No  |
| Yes | No  | ≥30 g/L | <5 ng/ml | <37 U/mL | <3 | No  | No  |
| Yes | No  | ≥30 g/L | <5 ng/ml | <37 U/mL | <3 | No  | No  |

|     |     |               |                |                |          |     |     |
|-----|-----|---------------|----------------|----------------|----------|-----|-----|
| No  | Yes | $\geq 30$ g/L | $< 5$ ng/ml    | $\geq 37$ U/mL | $< 3$    | No  | No  |
| Yes | No  | $\geq 30$ g/L | $< 5$ ng/ml    | $< 37$ U/mL    | $< 3$    | No  | No  |
| Yes | No  | $< 30$ g/L    | $< 5$ ng/ml    | $< 37$ U/mL    | $\geq 3$ | No  | No  |
| No  | Yes | $< 30$ g/L    | $< 5$ ng/ml    | $\geq 37$ U/mL | $< 3$    | No  | No  |
| No  | Yes | $\geq 30$ g/L | $< 5$ ng/ml    | $\geq 37$ U/mL | $< 3$    | No  | No  |
| No  | No  | $< 30$ g/L    | $< 5$ ng/ml    | $\geq 37$ U/mL | $\geq 3$ | No  | No  |
| No  | No  | $\geq 30$ g/L | $\geq 5$ ng/ml | $\geq 37$ U/mL | $\geq 3$ | No  | Yes |
| No  | No  | $\geq 30$ g/L | $\geq 5$ ng/ml | $< 37$ U/mL    | $\geq 3$ | Yes | No  |
| No  | Yes | $< 30$ g/L    | $\geq 5$ ng/ml | $< 37$ U/mL    | $\geq 3$ | Yes | No  |
| No  | Yes | $\geq 30$ g/L | $< 5$ ng/ml    | $< 37$ U/mL    | $< 3$    | Yes | No  |
| No  | Yes | $< 30$ g/L    | $< 5$ ng/ml    | $< 37$ U/mL    | $< 3$    | No  | No  |
| No  | No  | $\geq 30$ g/L | $< 5$ ng/ml    | $< 37$ U/mL    | $< 3$    | Yes | Yes |
| No  | No  | $\geq 30$ g/L | $< 5$ ng/ml    | $< 37$ U/mL    | $< 3$    | Yes | Yes |
| No  | No  | $\geq 30$ g/L | $< 5$ ng/ml    | $< 37$ U/mL    | $\geq 3$ | No  | No  |
| No  | No  | $\geq 30$ g/L | $< 5$ ng/ml    | $< 37$ U/mL    | $< 3$    | No  | No  |
| No  | Yes | $\geq 30$ g/L | $< 5$ ng/ml    | $< 37$ U/mL    | $< 3$    | No  | Yes |
| No  | No  | $< 30$ g/L    | $< 5$ ng/ml    | $< 37$ U/mL    | $< 3$    | No  | Yes |
| No  | No  | $< 30$ g/L    | $< 5$ ng/ml    | $< 37$ U/mL    | $< 3$    | No  | No  |
| No  | No  | $\geq 30$ g/L | $< 5$ ng/ml    | $< 37$ U/mL    | $< 3$    | No  | Yes |
| Yes | No  | $< 30$ g/L    | $< 5$ ng/ml    | $< 37$ U/mL    | $\geq 3$ | No  | No  |
| Yes | No  | $\geq 30$ g/L | $\geq 5$ ng/ml | $< 37$ U/mL    | $\geq 3$ | No  | No  |
| Yes | No  | $\geq 30$ g/L | $< 5$ ng/ml    | $< 37$ U/mL    | $\geq 3$ | No  | No  |
| No  | Yes | $< 30$ g/L    | $\geq 5$ ng/ml | $\geq 37$ U/mL | $\geq 3$ | No  | Yes |
| Yes | No  | $< 30$ g/L    | $< 5$ ng/ml    | $\geq 37$ U/mL | $\geq 3$ | No  | No  |
| Yes | No  | $< 30$ g/L    | $< 5$ ng/ml    | $< 37$ U/mL    | $< 3$    | No  | Yes |
| No  | Yes | $\geq 30$ g/L | $\geq 5$ ng/ml | $< 37$ U/mL    | $< 3$    | No  | No  |
| Yes | Yes | $\geq 30$ g/L | $< 5$ ng/ml    | $< 37$ U/mL    | $< 3$    | No  | No  |
| No  | Yes | $\geq 30$ g/L | $< 5$ ng/ml    | $< 37$ U/mL    | $< 3$    | No  | No  |
| No  | No  | $\geq 30$ g/L | $\geq 5$ ng/ml | $< 37$ U/mL    | $< 3$    | No  | No  |
| No  | No  | $< 30$ g/L    | $< 5$ ng/ml    | $< 37$ U/mL    | $< 3$    | No  | No  |
| No  | Yes | $\geq 30$ g/L | $< 5$ ng/ml    | $< 37$ U/mL    | $\geq 3$ | No  | No  |
| Yes | No  | $\geq 30$ g/L | $\geq 5$ ng/ml | $< 37$ U/mL    | $\geq 3$ | No  | Yes |
| No  | Yes | $< 30$ g/L    | $\geq 5$ ng/ml | $< 37$ U/mL    | $< 3$    | Yes | No  |
| No  | No  | $< 30$ g/L    | $< 5$ ng/ml    | $< 37$ U/mL    | $< 3$    | No  | Yes |
| No  | Yes | $< 30$ g/L    | $< 5$ ng/ml    | $< 37$ U/mL    | $< 3$    | Yes | Yes |
| No  | No  | $< 30$ g/L    | $\geq 5$ ng/ml | $< 37$ U/mL    | $< 3$    | No  | No  |
| No  | No  | $< 30$ g/L    | $< 5$ ng/ml    | $< 37$ U/mL    | $< 3$    | No  | No  |
| No  | No  | $< 30$ g/L    | $\geq 5$ ng/ml | $< 37$ U/mL    | $< 3$    | No  | No  |
| No  | No  | $< 30$ g/L    | $< 5$ ng/ml    | $< 37$ U/mL    | $< 3$    | No  | No  |
| No  | No  | $\geq 30$ g/L | $< 5$ ng/ml    | $\geq 37$ U/mL | $< 3$    | No  | No  |
| Yes | No  | $\geq 30$ g/L | $< 5$ ng/ml    | $\geq 37$ U/mL | $\geq 3$ | Yes | No  |
| No  | No  | $\geq 30$ g/L | $\geq 5$ ng/ml | $< 37$ U/mL    | $< 3$    | No  | No  |
| No  | Yes | $< 30$ g/L    | $\geq 5$ ng/ml | $< 37$ U/mL    | $< 3$    | Yes | No  |
| No  | No  | $< 30$ g/L    | $< 5$ ng/ml    | $< 37$ U/mL    | $\geq 3$ | No  | No  |
| No  | Yes | $< 30$ g/L    | $\geq 5$ ng/ml | $< 37$ U/mL    | $< 3$    | Yes | No  |
| No  | Yes | $\geq 30$ g/L | $< 5$ ng/ml    | $< 37$ U/mL    | $< 3$    | Yes | No  |
| No  | Yes | $\geq 30$ g/L | $< 5$ ng/ml    | $< 37$ U/mL    | $\geq 3$ | No  | Yes |
| No  | Yes | $\geq 30$ g/L | $< 5$ ng/ml    | $< 37$ U/mL    | $< 3$    | No  | Yes |
| No  | Yes | $< 30$ g/L    | $< 5$ ng/ml    | $< 37$ U/mL    | $\geq 3$ | Yes | Yes |
| No  | No  | $\geq 30$ g/L | $< 5$ ng/ml    | $\geq 37$ U/mL | $< 3$    | Yes | No  |
| No  | No  | $\geq 30$ g/L | $< 5$ ng/ml    | $\geq 37$ U/mL | $< 3$    | No  | No  |
| No  | No  | $\geq 30$ g/L | $< 5$ ng/ml    | $< 37$ U/mL    | $\geq 3$ | No  | Yes |
| No  | No  | $\geq 30$ g/L | $< 5$ ng/ml    | $< 37$ U/mL    | $\geq 3$ | No  | Yes |





|     |     |               |                |                |          |     |     |
|-----|-----|---------------|----------------|----------------|----------|-----|-----|
| Yes | Yes | $\geq 30$ g/L | $\geq 5$ ng/ml | $< 37$ U/mL    | $< 3$    | Yes | No  |
| No  | Yes | $< 30$ g/L    | $< 5$ ng/ml    | $< 37$ U/mL    | $< 3$    | No  | No  |
| Yes | No  | $\geq 30$ g/L | $< 5$ ng/ml    | $< 37$ U/mL    | $< 3$    | No  | No  |
| No  | No  | $\geq 30$ g/L | $\geq 5$ ng/ml | $< 37$ U/mL    | $< 3$    | Yes | No  |
| No  | No  | $\geq 30$ g/L | $\geq 5$ ng/ml | $\geq 37$ U/mL | $< 3$    | No  | No  |
| No  | No  | $< 30$ g/L    | $< 5$ ng/ml    | $\geq 37$ U/mL | $< 3$    | No  | No  |
| No  | No  | $< 30$ g/L    | $< 5$ ng/ml    | $< 37$ U/mL    | $\geq 3$ | No  | No  |
| No  | No  | $\geq 30$ g/L | $< 5$ ng/ml    | $\geq 37$ U/mL | $\geq 3$ | No  | No  |
| No  | No  | $< 30$ g/L    | $\geq 5$ ng/ml | $< 37$ U/mL    | $< 3$    | No  | No  |
| Yes | No  | $\geq 30$ g/L | $< 5$ ng/ml    | $\geq 37$ U/mL | $\geq 3$ | No  | No  |
| Yes | No  | $< 30$ g/L    | $< 5$ ng/ml    | $\geq 37$ U/mL | $< 3$    | No  | No  |
| Yes | No  | $< 30$ g/L    | $< 5$ ng/ml    | $< 37$ U/mL    | $< 3$    | No  | No  |
| No  | No  | $< 30$ g/L    | $< 5$ ng/ml    | $< 37$ U/mL    | $< 3$    | No  | No  |
| Yes | No  | $< 30$ g/L    | $\geq 5$ ng/ml | $< 37$ U/mL    | $< 3$    | No  | No  |
| No  | Yes | $\geq 30$ g/L | $< 5$ ng/ml    | $< 37$ U/mL    | $< 3$    | No  | No  |
| No  | No  | $< 30$ g/L    | $< 5$ ng/ml    | $< 37$ U/mL    | $< 3$    | No  | No  |
| No  | Yes | $< 30$ g/L    | $< 5$ ng/ml    | $\geq 37$ U/mL | $< 3$    | No  | No  |
| Yes | No  | $< 30$ g/L    | $< 5$ ng/ml    | $\geq 37$ U/mL | $< 3$    | No  | No  |
| Yes | No  | $\geq 30$ g/L | $< 5$ ng/ml    | $< 37$ U/mL    | $< 3$    | No  | No  |
| Yes | No  | $\geq 30$ g/L | $< 5$ ng/ml    | $\geq 37$ U/mL | $< 3$    | No  | No  |
| No  | No  | $\geq 30$ g/L | $< 5$ ng/ml    | $< 37$ U/mL    | $< 3$    | Yes | Yes |
| No  | No  | $\geq 30$ g/L | $< 5$ ng/ml    | $< 37$ U/mL    | $< 3$    | No  | No  |
| Yes | No  | $< 30$ g/L    | $< 5$ ng/ml    | $< 37$ U/mL    | $\geq 3$ | No  | No  |
| Yes | No  | $< 30$ g/L    | $\geq 5$ ng/ml | $< 37$ U/mL    | $< 3$    | No  | No  |
| No  | No  | $\geq 30$ g/L | $< 5$ ng/ml    | $< 37$ U/mL    | $< 3$    | No  | No  |
| No  | No  | $< 30$ g/L    | $< 5$ ng/ml    | $< 37$ U/mL    | $< 3$    | No  | No  |
| No  | No  | $< 30$ g/L    | $\geq 5$ ng/ml | $< 37$ U/mL    | $\geq 3$ | No  | No  |
| No  | No  | $< 30$ g/L    | $\geq 5$ ng/ml | $\geq 37$ U/mL | $< 3$    | No  | No  |
| No  | No  | $< 30$ g/L    | $\geq 5$ ng/ml | $\geq 37$ U/mL | $< 3$    | No  | Yes |
| No  | No  | $< 30$ g/L    | $\geq 5$ ng/ml | $\geq 37$ U/mL | $< 3$    | No  | No  |
| Yes | No  | $< 30$ g/L    | $\geq 5$ ng/ml | $< 37$ U/mL    | $\geq 3$ | No  | No  |
| Yes | No  | $\geq 30$ g/L | $\geq 5$ ng/ml | $< 37$ U/mL    | $\geq 3$ | No  | No  |
| No  | No  | $< 30$ g/L    | $< 5$ ng/ml    | $< 37$ U/mL    | $\geq 3$ | No  | No  |
| No  | No  | $\geq 30$ g/L | $\geq 5$ ng/ml | $\geq 37$ U/mL | $\geq 3$ | No  | No  |
| No  | No  | $< 30$ g/L    | $\geq 5$ ng/ml | $< 37$ U/mL    | $< 3$    | No  | No  |
| No  | No  | $\geq 30$ g/L | $< 5$ ng/ml    | $< 37$ U/mL    | $< 3$    | Yes | No  |
| No  | No  | $\geq 30$ g/L | $< 5$ ng/ml    | $\geq 37$ U/mL | $< 3$    | No  | No  |
| No  | Yes | $< 30$ g/L    | $< 5$ ng/ml    | $\geq 37$ U/mL | $< 3$    | No  | No  |
| No  | No  | $< 30$ g/L    | $< 5$ ng/ml    | $< 37$ U/mL    | $< 3$    | No  | No  |
| No  | No  | $< 30$ g/L    | $< 5$ ng/ml    | $\geq 37$ U/mL | $< 3$    | No  | No  |
| No  | Yes | $< 30$ g/L    | $< 5$ ng/ml    | $< 37$ U/mL    | $< 3$    | No  | No  |
| No  | Yes | $< 30$ g/L    | $< 5$ ng/ml    | $< 37$ U/mL    | $< 3$    | No  | No  |
| No  | Yes | $\geq 30$ g/L | $< 5$ ng/ml    | $< 37$ U/mL    | $< 3$    | No  | No  |
| No  | No  | $< 30$ g/L    | $< 5$ ng/ml    | $\geq 37$ U/mL | $< 3$    | No  | Yes |
| No  | Yes | $< 30$ g/L    | $< 5$ ng/ml    | $< 37$ U/mL    | $< 3$    | No  | No  |
| No  | No  | $< 30$ g/L    | $< 5$ ng/ml    | $\geq 37$ U/mL | $\geq 3$ | No  | Yes |
| Yes | Yes | $\geq 30$ g/L | $\geq 5$ ng/ml | $\geq 37$ U/mL | $\geq 3$ | No  | Yes |
| Yes | Yes | $< 30$ g/L    | $\geq 5$ ng/ml | $\geq 37$ U/mL | $< 3$    | No  | Yes |
| Yes | No  | $< 30$ g/L    | $\geq 5$ ng/ml | $< 37$ U/mL    | $\geq 3$ | No  | No  |
| No  | No  | $< 30$ g/L    | $< 5$ ng/ml    | $< 37$ U/mL    | $< 3$    | No  | Yes |
| No  | No  | $< 30$ g/L    | $< 5$ ng/ml    | $\geq 37$ U/mL | $< 3$    | No  | No  |
| Yes | Yes | $< 30$ g/L    | $< 5$ ng/ml    | $\geq 37$ U/mL | $< 3$    | Yes | No  |
| No  | No  | $\geq 30$ g/L | $\geq 5$ ng/ml | $< 37$ U/mL    | $< 3$    | No  | No  |

|     |     |               |                |                |          |     |     |
|-----|-----|---------------|----------------|----------------|----------|-----|-----|
| No  | No  | $\geq 30$ g/L | $\geq 5$ ng/ml | $\geq 37$ U/mL | $< 3$    | No  | No  |
| No  | No  | $< 30$ g/L    | $< 5$ ng/ml    | $< 37$ U/mL    | $< 3$    | No  | No  |
| Yes | No  | $< 30$ g/L    | $\geq 5$ ng/ml | $< 37$ U/mL    | $< 3$    | Yes | No  |
| Yes | No  | $\geq 30$ g/L | $\geq 5$ ng/ml | $\geq 37$ U/mL | $< 3$    | Yes | No  |
| Yes | No  | $< 30$ g/L    | $\geq 5$ ng/ml | $< 37$ U/mL    | $< 3$    | No  | No  |
| Yes | No  | $< 30$ g/L    | $\geq 5$ ng/ml | $< 37$ U/mL    | $< 3$    | No  | No  |
| Yes | No  | $\geq 30$ g/L | $< 5$ ng/ml    | $< 37$ U/mL    | $< 3$    | No  | No  |
| Yes | No  | $\geq 30$ g/L | $< 5$ ng/ml    | $< 37$ U/mL    | $< 3$    | No  | No  |
| Yes | No  | $\geq 30$ g/L | $< 5$ ng/ml    | $< 37$ U/mL    | $\geq 3$ | No  | No  |
| Yes | No  | $< 30$ g/L    | $< 5$ ng/ml    | $\geq 37$ U/mL | $\geq 3$ | No  | No  |
| No  | No  | $\geq 30$ g/L | $< 5$ ng/ml    | $\geq 37$ U/mL | $\geq 3$ | No  | No  |
| No  | No  | $\geq 30$ g/L | $< 5$ ng/ml    | $< 37$ U/mL    | $< 3$    | No  | No  |
| No  | No  | $< 30$ g/L    | $< 5$ ng/ml    | $< 37$ U/mL    | $< 3$    | No  | No  |
| No  | No  | $\geq 30$ g/L | $< 5$ ng/ml    | $< 37$ U/mL    | $< 3$    | No  | No  |
| No  | No  | $< 30$ g/L    | $\geq 5$ ng/ml | $< 37$ U/mL    | $< 3$    | No  | Yes |
| No  | No  | $< 30$ g/L    | $< 5$ ng/ml    | $< 37$ U/mL    | $< 3$    | No  | No  |
| No  | No  | $< 30$ g/L    | $< 5$ ng/ml    | $< 37$ U/mL    | $< 3$    | No  | Yes |
| No  | No  | $\geq 30$ g/L | $< 5$ ng/ml    | $< 37$ U/mL    | $< 3$    | No  | Yes |
| No  | No  | $< 30$ g/L    | $< 5$ ng/ml    | $\geq 37$ U/mL | $< 3$    | No  | No  |
| No  | No  | $\geq 30$ g/L | $< 5$ ng/ml    | $\geq 37$ U/mL | $< 3$    | No  | Yes |
| No  | No  | $< 30$ g/L    | $< 5$ ng/ml    | $< 37$ U/mL    | $\geq 3$ | No  | No  |
| No  | Yes | $< 30$ g/L    | $< 5$ ng/ml    | $< 37$ U/mL    | $< 3$    | No  | Yes |
| No  | Yes | $< 30$ g/L    | $< 5$ ng/ml    | $< 37$ U/mL    | $\geq 3$ | No  | No  |
| No  | No  | $\geq 30$ g/L | $< 5$ ng/ml    | $\geq 37$ U/mL | $\geq 3$ | No  | No  |
| No  | Yes | $< 30$ g/L    | $< 5$ ng/ml    | $< 37$ U/mL    | $\geq 3$ | Yes | No  |
| No  | Yes | $\geq 30$ g/L | $\geq 5$ ng/ml | $< 37$ U/mL    | $< 3$    | Yes | No  |
| No  | Yes | $< 30$ g/L    | $\geq 5$ ng/ml | $\geq 37$ U/mL | $< 3$    | No  | Yes |
| Yes | No  | $< 30$ g/L    | $\geq 5$ ng/ml | $< 37$ U/mL    | $\geq 3$ | No  | No  |
| Yes | No  | $\geq 30$ g/L | $< 5$ ng/ml    | $\geq 37$ U/mL | $\geq 3$ | No  | No  |
| Yes | No  | $< 30$ g/L    | $< 5$ ng/ml    | $\geq 37$ U/mL | $< 3$    | No  | No  |
| No  | No  | $\geq 30$ g/L | $\geq 5$ ng/ml | $< 37$ U/mL    | $< 3$    | No  | No  |
| No  | No  | $\geq 30$ g/L | $\geq 5$ ng/ml | $< 37$ U/mL    | $< 3$    | No  | No  |
| Yes | No  | $< 30$ g/L    | $< 5$ ng/ml    | $< 37$ U/mL    | $< 3$    | No  | No  |
| Yes | No  | $< 30$ g/L    | $< 5$ ng/ml    | $< 37$ U/mL    | $< 3$    | No  | No  |
| Yes | No  | $< 30$ g/L    | $\geq 5$ ng/ml | $< 37$ U/mL    | $< 3$    | No  | No  |
| No  | No  | $< 30$ g/L    | $\geq 5$ ng/ml | $< 37$ U/mL    | $\geq 3$ | No  | No  |
| Yes | No  | $< 30$ g/L    | $< 5$ ng/ml    | $< 37$ U/mL    | $\geq 3$ | No  | Yes |
| No  | No  | $\geq 30$ g/L | $< 5$ ng/ml    | $< 37$ U/mL    | $< 3$    | No  | No  |
| No  | No  | $< 30$ g/L    | $< 5$ ng/ml    | $< 37$ U/mL    | $< 3$    | No  | No  |
| Yes | No  | $< 30$ g/L    | $< 5$ ng/ml    | $< 37$ U/mL    | $< 3$    | No  | Yes |
| No  | No  | $< 30$ g/L    | $\geq 5$ ng/ml | $\geq 37$ U/mL | $\geq 3$ | No  | Yes |
| Yes | No  | $\geq 30$ g/L | $\geq 5$ ng/ml | $\geq 37$ U/mL | $\geq 3$ | No  | No  |
| Yes | No  | $\geq 30$ g/L | $< 5$ ng/ml    | $< 37$ U/mL    | $< 3$    | No  | Yes |
| No  | Yes | $< 30$ g/L    | $< 5$ ng/ml    | $\geq 37$ U/mL | $< 3$    | No  | No  |
| Yes | No  | $\geq 30$ g/L | $< 5$ ng/ml    | $\geq 37$ U/mL | $< 3$    | Yes | No  |
| No  | No  | $< 30$ g/L    | $< 5$ ng/ml    | $< 37$ U/mL    | $< 3$    | Yes | No  |
| Yes | No  | $< 30$ g/L    | $< 5$ ng/ml    | $\geq 37$ U/mL | $< 3$    | No  | No  |
| Yes | Yes | $\geq 30$ g/L | $< 5$ ng/ml    | $\geq 37$ U/mL | $< 3$    | No  | Yes |
| No  | No  | $< 30$ g/L    | $< 5$ ng/ml    | $\geq 37$ U/mL | $< 3$    | No  | No  |
| No  | No  | $< 30$ g/L    | $< 5$ ng/ml    | $< 37$ U/mL    | $< 3$    | Yes | No  |
| No  | No  | $\geq 30$ g/L | $< 5$ ng/ml    | $\geq 37$ U/mL | $< 3$    | Yes | Yes |



|     |     |         |          |          |    |     |     |
|-----|-----|---------|----------|----------|----|-----|-----|
| No  | No  | <30 g/L | ≥5 ng/ml | <37 U/mL | ≥3 | No  | No  |
| No  | No  | <30 g/L | <5 ng/ml | ≥37 U/mL | <3 | No  | No  |
| No  | No  | <30 g/L | <5 ng/ml | <37 U/mL | ≥3 | No  | No  |
| Yes | No  | ≥30 g/L | <5 ng/ml | ≥37 U/mL | ≥3 | No  | Yes |
| No  | No  | <30 g/L | <5 ng/ml | ≥37 U/mL | <3 | No  | Yes |
| No  | No  | ≥30 g/L | <5 ng/ml | ≥37 U/mL | <3 | No  | Yes |
| Yes | Yes | <30 g/L | <5 ng/ml | <37 U/mL | <3 | No  | No  |
| No  | Yes | <30 g/L | <5 ng/ml | <37 U/mL | <3 | No  | No  |
| No  | Yes | <30 g/L | <5 ng/ml | <37 U/mL | <3 | No  | Yes |
| Yes | Yes | ≥30 g/L | <5 ng/ml | <37 U/mL | <3 | No  | Yes |
| Yes | Yes | ≥30 g/L | <5 ng/ml | ≥37 U/mL | <3 | No  | No  |
| No  | Yes | <30 g/L | ≥5 ng/ml | <37 U/mL | <3 | No  | No  |
| Yes | No  | ≥30 g/L | ≥5 ng/ml | ≥37 U/mL | <3 | No  | No  |
| No  | No  | <30 g/L | <5 ng/ml | <37 U/mL | <3 | No  | Yes |
| Yes | Yes | ≥30 g/L | ≥5 ng/ml | ≥37 U/mL | <3 | No  | Yes |
| No  | Yes | ≥30 g/L | <5 ng/ml | <37 U/mL | <3 | No  | Yes |
| Yes | No  | <30 g/L | ≥5 ng/ml | ≥37 U/mL | ≥3 | No  | Yes |
| Yes | No  | ≥30 g/L | <5 ng/ml | ≥37 U/mL | ≥3 | No  | No  |
| Yes | No  | <30 g/L | <5 ng/ml | <37 U/mL | ≥3 | No  | No  |
| No  | No  | <30 g/L | <5 ng/ml | <37 U/mL | <3 | No  | No  |
| No  | No  | ≥30 g/L | <5 ng/ml | <37 U/mL | <3 | Yes | No  |
| No  | No  | ≥30 g/L | <5 ng/ml | <37 U/mL | <3 | Yes | Yes |
| No  | No  | <30 g/L | ≥5 ng/ml | <37 U/mL | ≥3 | No  | No  |
| No  | No  | <30 g/L | ≥5 ng/ml | <37 U/mL | <3 | Yes | No  |
| No  | No  | <30 g/L | <5 ng/ml | <37 U/mL | <3 | No  | No  |
| No  | Yes | <30 g/L | <5 ng/ml | <37 U/mL | <3 | No  | No  |
| No  | No  | ≥30 g/L | ≥5 ng/ml | <37 U/mL | <3 | No  | No  |
| No  | Yes | ≥30 g/L | ≥5 ng/ml | <37 U/mL | <3 | No  | Yes |
| No  | No  | <30 g/L | <5 ng/ml | <37 U/mL | ≥3 | Yes | No  |
| Yes | No  | <30 g/L | ≥5 ng/ml | ≥37 U/mL | <3 | Yes | No  |
| No  | Yes | <30 g/L | ≥5 ng/ml | <37 U/mL | <3 | No  | No  |
| No  | No  | <30 g/L | ≥5 ng/ml | ≥37 U/mL | ≥3 | No  | No  |
| Yes | No  | <30 g/L | <5 ng/ml | ≥37 U/mL | ≥3 | No  | No  |
| Yes | No  | <30 g/L | <5 ng/ml | <37 U/mL | <3 | No  | No  |
| No  | No  | ≥30 g/L | ≥5 ng/ml | ≥37 U/mL | ≥3 | No  | No  |
| No  | No  | <30 g/L | ≥5 ng/ml | ≥37 U/mL | <3 | No  | No  |
| No  | No  | <30 g/L | <5 ng/ml | <37 U/mL | <3 | No  | No  |
| No  | No  | ≥30 g/L | <5 ng/ml | <37 U/mL | <3 | No  | No  |
| No  | No  | <30 g/L | <5 ng/ml | <37 U/mL | <3 | No  | No  |
| No  | No  | <30 g/L | <5 ng/ml | <37 U/mL | <3 | No  | No  |
| Yes | No  | ≥30 g/L | <5 ng/ml | <37 U/mL | <3 | No  | No  |
| Yes | No  | ≥30 g/L | <5 ng/ml | <37 U/mL | <3 | No  | No  |
| No  | No  | ≥30 g/L | <5 ng/ml | <37 U/mL | <3 | No  | No  |
| No  | No  | <30 g/L | ≥5 ng/ml | <37 U/mL | <3 | No  | No  |
| No  | Yes | <30 g/L | <5 ng/ml | <37 U/mL | ≥3 | No  | No  |
| No  | No  | ≥30 g/L | ≥5 ng/ml | <37 U/mL | ≥3 | No  | No  |
| No  | No  | <30 g/L | <5 ng/ml | <37 U/mL | <3 | No  | Yes |
| No  | Yes | <30 g/L | <5 ng/ml | <37 U/mL | <3 | No  | Yes |
| No  | No  | ≥30 g/L | <5 ng/ml | ≥37 U/mL | <3 | Yes | No  |
| Yes | No  | ≥30 g/L | <5 ng/ml | ≥37 U/mL | ≥3 | No  | Yes |
| Yes | No  | ≥30 g/L | ≥5 ng/ml | <37 U/mL | <3 | No  | No  |

|     |     |               |                |                |          |     |     |
|-----|-----|---------------|----------------|----------------|----------|-----|-----|
| Yes | No  | $\geq 30$ g/L | $< 5$ ng/ml    | $< 37$ U/mL    | $\geq 3$ | No  | No  |
| Yes | Yes | $< 30$ g/L    | $\geq 5$ ng/ml | $< 37$ U/mL    | $< 3$    | No  | No  |
| No  | No  | $\geq 30$ g/L | $< 5$ ng/ml    | $\geq 37$ U/mL | $< 3$    | Yes | Yes |
| No  | Yes | $< 30$ g/L    | $< 5$ ng/ml    | $\geq 37$ U/mL | $\geq 3$ | No  | Yes |
| No  | No  | $\geq 30$ g/L | $< 5$ ng/ml    | $\geq 37$ U/mL | $\geq 3$ | Yes | Yes |
| No  | Yes | $< 30$ g/L    | $< 5$ ng/ml    | $< 37$ U/mL    | $< 3$    | No  | No  |
| No  | No  | $\geq 30$ g/L | $< 5$ ng/ml    | $< 37$ U/mL    | $< 3$    | No  | No  |
| No  | Yes | $< 30$ g/L    | $\geq 5$ ng/ml | $< 37$ U/mL    | $< 3$    | No  | No  |
| No  | No  | $< 30$ g/L    | $< 5$ ng/ml    | $< 37$ U/mL    | $< 3$    | No  | No  |
| No  | No  | $< 30$ g/L    | $< 5$ ng/ml    | $< 37$ U/mL    | $\geq 3$ | No  | No  |
| Yes | No  | $\geq 30$ g/L | $< 5$ ng/ml    | $< 37$ U/mL    | $\geq 3$ | No  | No  |
| Yes | No  | $< 30$ g/L    | $< 5$ ng/ml    | $\geq 37$ U/mL | $< 3$    | No  | No  |
| No  | No  | $\geq 30$ g/L | $\geq 5$ ng/ml | $\geq 37$ U/mL | $< 3$    | No  | No  |
| No  | No  | $< 30$ g/L    | $< 5$ ng/ml    | $< 37$ U/mL    | $< 3$    | No  | No  |
| Yes | No  | $\geq 30$ g/L | $< 5$ ng/ml    | $< 37$ U/mL    | $< 3$    | No  | No  |
| No  | No  | $\geq 30$ g/L | $< 5$ ng/ml    | $\geq 37$ U/mL | $< 3$    | No  | No  |
| Yes | No  | $< 30$ g/L    | $\geq 5$ ng/ml | $< 37$ U/mL    | $< 3$    | No  | No  |
| No  | No  | $< 30$ g/L    | $< 5$ ng/ml    | $< 37$ U/mL    | $< 3$    | No  | No  |
| Yes | No  | $< 30$ g/L    | $< 5$ ng/ml    | $\geq 37$ U/mL | $< 3$    | No  | No  |
| No  | No  | $< 30$ g/L    | $< 5$ ng/ml    | $< 37$ U/mL    | $\geq 3$ | No  | No  |
| Yes | Yes | $\geq 30$ g/L | $\geq 5$ ng/ml | $< 37$ U/mL    | $< 3$    | No  | No  |
| Yes | No  | $< 30$ g/L    | $\geq 5$ ng/ml | $< 37$ U/mL    | $< 3$    | No  | No  |
| No  | No  | $\geq 30$ g/L | $< 5$ ng/ml    | $< 37$ U/mL    | $< 3$    | No  | No  |
| Yes | No  | $< 30$ g/L    | $\geq 5$ ng/ml | $< 37$ U/mL    | $\geq 3$ | No  | No  |
| Yes | No  | $< 30$ g/L    | $< 5$ ng/ml    | $< 37$ U/mL    | $\geq 3$ | No  | No  |
| No  | No  | $\geq 30$ g/L | $< 5$ ng/ml    | $< 37$ U/mL    | $< 3$    | No  | Yes |
| No  | No  | $< 30$ g/L    | $< 5$ ng/ml    | $< 37$ U/mL    | $< 3$    | No  | No  |
| No  | No  | $\geq 30$ g/L | $\geq 5$ ng/ml | $< 37$ U/mL    | $< 3$    | No  | No  |
| Yes | No  | $\geq 30$ g/L | $< 5$ ng/ml    | $\geq 37$ U/mL | $< 3$    | Yes | No  |
| Yes | No  | $\geq 30$ g/L | $< 5$ ng/ml    | $< 37$ U/mL    | $< 3$    | No  | Yes |
| Yes | No  | $< 30$ g/L    | $< 5$ ng/ml    | $< 37$ U/mL    | $< 3$    | No  | Yes |
| Yes | No  | $\geq 30$ g/L | $< 5$ ng/ml    | $< 37$ U/mL    | $< 3$    | Yes | No  |
| Yes | No  | $< 30$ g/L    | $< 5$ ng/ml    | $\geq 37$ U/mL | $\geq 3$ | No  | Yes |
| Yes | No  | $< 30$ g/L    | $< 5$ ng/ml    | $< 37$ U/mL    | $< 3$    | No  | No  |
| Yes | Yes | $< 30$ g/L    | $< 5$ ng/ml    | $\geq 37$ U/mL | $\geq 3$ | Yes | Yes |
| No  | No  | $< 30$ g/L    | $< 5$ ng/ml    | $< 37$ U/mL    | $< 3$    | Yes | No  |
| Yes | Yes | $< 30$ g/L    | $\geq 5$ ng/ml | $< 37$ U/mL    | $< 3$    | No  | No  |
| Yes | No  | $< 30$ g/L    | $\geq 5$ ng/ml | $\geq 37$ U/mL | $< 3$    | No  | Yes |
| No  | No  | $\geq 30$ g/L | $< 5$ ng/ml    | $< 37$ U/mL    | $\geq 3$ | No  | No  |
| No  | No  | $< 30$ g/L    | $< 5$ ng/ml    | $\geq 37$ U/mL | $< 3$    | Yes | Yes |
| No  | No  | $\geq 30$ g/L | $< 5$ ng/ml    | $\geq 37$ U/mL | $\geq 3$ | No  | No  |
| Yes | No  | $\geq 30$ g/L | $< 5$ ng/ml    | $< 37$ U/mL    | $\geq 3$ | Yes | No  |
| No  | No  | $< 30$ g/L    | $< 5$ ng/ml    | $< 37$ U/mL    | $< 3$    | No  | No  |
| No  | No  | $\geq 30$ g/L | $< 5$ ng/ml    | $< 37$ U/mL    | $< 3$    | No  | No  |
| No  | No  | $< 30$ g/L    | $< 5$ ng/ml    | $< 37$ U/mL    | $< 3$    | Yes | No  |
| No  | No  | $< 30$ g/L    | $< 5$ ng/ml    | $< 37$ U/mL    | $< 3$    | No  | No  |
| Yes | No  | $< 30$ g/L    | $< 5$ ng/ml    | $< 37$ U/mL    | $< 3$    | No  | No  |
| Yes | No  | $< 30$ g/L    | $< 5$ ng/ml    | $< 37$ U/mL    | $< 3$    | No  | No  |
| No  | No  | $< 30$ g/L    | $\geq 5$ ng/ml | $< 37$ U/mL    | $\geq 3$ | No  | No  |
| No  | No  | $\geq 30$ g/L | $\geq 5$ ng/ml | $< 37$ U/mL    | $\geq 3$ | No  | No  |
| No  | No  | $< 30$ g/L    | $< 5$ ng/ml    | $< 37$ U/mL    | $\geq 3$ | No  | No  |

|     |     |               |                |                |          |     |     |
|-----|-----|---------------|----------------|----------------|----------|-----|-----|
| No  | Yes | $\geq 30$ g/L | $< 5$ ng/ml    | $\geq 37$ U/mL | $< 3$    | No  | No  |
| No  | Yes | $< 30$ g/L    | $\geq 5$ ng/ml | $\geq 37$ U/mL | $< 3$    | No  | No  |
| No  | No  | $< 30$ g/L    | $\geq 5$ ng/ml | $\geq 37$ U/mL | $< 3$    | No  | No  |
| No  | No  | $\geq 30$ g/L | $< 5$ ng/ml    | $< 37$ U/mL    | $\geq 3$ | No  | No  |
| No  | No  | $< 30$ g/L    | $\geq 5$ ng/ml | $< 37$ U/mL    | $< 3$    | No  | No  |
| No  | No  | $< 30$ g/L    | $\geq 5$ ng/ml | $< 37$ U/mL    | $< 3$    | No  | No  |
| Yes | No  | $\geq 30$ g/L | $< 5$ ng/ml    | $< 37$ U/mL    | $\geq 3$ | No  | No  |
| Yes | No  | $< 30$ g/L    | $\geq 5$ ng/ml | $< 37$ U/mL    | $< 3$    | No  | No  |
| No  | Yes | $\geq 30$ g/L | $\geq 5$ ng/ml | $< 37$ U/mL    | $< 3$    | No  | No  |
| No  | Yes | $< 30$ g/L    | $< 5$ ng/ml    | $< 37$ U/mL    | $< 3$    | No  | No  |
| No  | No  | $< 30$ g/L    | $< 5$ ng/ml    | $< 37$ U/mL    | $< 3$    | No  | No  |
| Yes | Yes | $< 30$ g/L    | $\geq 5$ ng/ml | $< 37$ U/mL    | $< 3$    | No  | No  |
| Yes | No  | $< 30$ g/L    | $< 5$ ng/ml    | $< 37$ U/mL    | $< 3$    | Yes | No  |
| No  | No  | $\geq 30$ g/L | $< 5$ ng/ml    | $< 37$ U/mL    | $< 3$    | No  | No  |
| No  | No  | $\geq 30$ g/L | $< 5$ ng/ml    | $\geq 37$ U/mL | $< 3$    | No  | No  |
| No  | Yes | $< 30$ g/L    | $< 5$ ng/ml    | $\geq 37$ U/mL | $< 3$    | Yes | No  |
| No  | No  | $< 30$ g/L    | $< 5$ ng/ml    | $\geq 37$ U/mL | $\geq 3$ | No  | Yes |
| No  | Yes | $\geq 30$ g/L | $< 5$ ng/ml    | $\geq 37$ U/mL | $\geq 3$ | No  | Yes |
| No  | Yes | $< 30$ g/L    | $\geq 5$ ng/ml | $\geq 37$ U/mL | $< 3$    | No  | No  |
| No  | Yes | $< 30$ g/L    | $< 5$ ng/ml    | $< 37$ U/mL    | $< 3$    | No  | Yes |
| No  | No  | $\geq 30$ g/L | $< 5$ ng/ml    | $\geq 37$ U/mL | $\geq 3$ | No  | Yes |
| No  | No  | $\geq 30$ g/L | $\geq 5$ ng/ml | $< 37$ U/mL    | $\geq 3$ | No  | Yes |
| No  | Yes | $< 30$ g/L    | $\geq 5$ ng/ml | $< 37$ U/mL    | $< 3$    | No  | No  |
| No  | No  | $< 30$ g/L    | $\geq 5$ ng/ml | $\geq 37$ U/mL | $< 3$    | No  | No  |
| No  | Yes | $< 30$ g/L    | $< 5$ ng/ml    | $< 37$ U/mL    | $< 3$    | No  | Yes |
| No  | No  | $\geq 30$ g/L | $\geq 5$ ng/ml | $\geq 37$ U/mL | $< 3$    | No  | No  |
| No  | Yes | $\geq 30$ g/L | $< 5$ ng/ml    | $< 37$ U/mL    | $< 3$    | No  | No  |
| No  | Yes | $\geq 30$ g/L | $< 5$ ng/ml    | $< 37$ U/mL    | $< 3$    | No  | Yes |
| Yes | No  | $\geq 30$ g/L | $< 5$ ng/ml    | $< 37$ U/mL    | $< 3$    | Yes | Yes |
| No  | No  | $\geq 30$ g/L | $< 5$ ng/ml    | $< 37$ U/mL    | $< 3$    | Yes | No  |
| Yes | No  | $\geq 30$ g/L | $< 5$ ng/ml    | $< 37$ U/mL    | $\geq 3$ | No  | No  |
| Yes | No  | $< 30$ g/L    | $< 5$ ng/ml    | $< 37$ U/mL    | $< 3$    | No  | No  |
| Yes | Yes | $\geq 30$ g/L | $\geq 5$ ng/ml | $< 37$ U/mL    | $\geq 3$ | No  | No  |
| No  | No  | $< 30$ g/L    | $\geq 5$ ng/ml | $< 37$ U/mL    | $\geq 3$ | No  | No  |
| No  | No  | $< 30$ g/L    | $< 5$ ng/ml    | $\geq 37$ U/mL | $< 3$    | Yes | No  |
| Yes | No  | $< 30$ g/L    | $< 5$ ng/ml    | $\geq 37$ U/mL | $\geq 3$ | Yes | No  |
| Yes | No  | $\geq 30$ g/L | $< 5$ ng/ml    | $\geq 37$ U/mL | $< 3$    | Yes | No  |
| No  | No  | $< 30$ g/L    | $< 5$ ng/ml    | $< 37$ U/mL    | $< 3$    | No  | No  |
| No  | No  | $< 30$ g/L    | $\geq 5$ ng/ml | $< 37$ U/mL    | $< 3$    | No  | No  |
| No  | No  | $< 30$ g/L    | $< 5$ ng/ml    | $< 37$ U/mL    | $\geq 3$ | Yes | Yes |
| No  | Yes | $< 30$ g/L    | $< 5$ ng/ml    | $< 37$ U/mL    | $< 3$    | Yes | No  |
| No  | Yes | $< 30$ g/L    | $\geq 5$ ng/ml | $< 37$ U/mL    | $< 3$    | Yes | No  |
| No  | No  | $\geq 30$ g/L | $\geq 5$ ng/ml | $\geq 37$ U/mL | $< 3$    | Yes | No  |
| No  | No  | $\geq 30$ g/L | $\geq 5$ ng/ml | $\geq 37$ U/mL | $\geq 3$ | No  | No  |
| Yes | Yes | $\geq 30$ g/L | $< 5$ ng/ml    | $\geq 37$ U/mL | $\geq 3$ | No  | No  |
| Yes | No  | $< 30$ g/L    | $\geq 5$ ng/ml | $\geq 37$ U/mL | $\geq 3$ | No  | No  |

| CHD | COPD | Diabetes | Hyperlipidemia | Hypertension | Ulcerative colitis | Crohn's Disease |
|-----|------|----------|----------------|--------------|--------------------|-----------------|
| No  | No   | Yes      | Yes            | No           | No                 | Yes             |
| No  | No   | Yes      | No             | Yes          | Yes                | No              |
| Yes | No   | Yes      | No             | No           | No                 | No              |
| No  | No   | No       | Yes            | Yes          | Yes                | No              |
| Yes | No   | Yes      | No             | Yes          | No                 | Yes             |
| No  | No   | Yes      | Yes            | Yes          | No                 | No              |
| No  | Yes  | Yes      | No             | No           | No                 | Yes             |
| No  | No   | No       | No             | No           | No                 | Yes             |
| Yes | No   | No       | No             | No           | No                 | No              |
| Yes | No   | No       | No             | No           | No                 | No              |
| No  | No   | Yes      | No             | Yes          | No                 | No              |
| Yes | Yes  | Yes      | No             | Yes          | No                 | No              |
| No  | Yes  | No       | No             | No           | No                 | No              |
| Yes | Yes  | Yes      | Yes            | No           | No                 | No              |
| No  | No   | Yes      | No             | Yes          | Yes                | No              |
| Yes | No   | Yes      | No             | Yes          | No                 | No              |
| No  | Yes  | No       | Yes            | No           | No                 | No              |
| Yes | No   | No       | No             | Yes          | No                 | No              |
| Yes | No   | No       | Yes            | No           | No                 | No              |
| No  | Yes  | Yes      | No             | No           | No                 | No              |
| No  | No   | Yes      | No             | No           | No                 | Yes             |
| No  | No   | Yes      | No             | No           | No                 | Yes             |
| No  | No   | Yes      | No             | No           | No                 | No              |
| No  | No   | Yes      | Yes            | No           | No                 | No              |
| No  | No   | No       | Yes            | No           | No                 | No              |
| No  | No   | No       | No             | Yes          | No                 | No              |
| No  | No   | No       | No             | Yes          | No                 | Yes             |
| Yes | No   | No       | No             | No           | No                 | No              |
| No  | Yes  | Yes      | No             | Yes          | Yes                | Yes             |
| No  | Yes  | Yes      | No             | Yes          | Yes                | No              |
| Yes | No   | Yes      | No             | No           | No                 | No              |
| Yes | Yes  | No       | No             | Yes          | No                 | No              |
| No  | No   | No       | No             | Yes          | No                 | No              |
| No  | No   | Yes      | No             | Yes          | No                 | No              |
| Yes | Yes  | Yes      | No             | No           | No                 | No              |
| No  | Yes  | No       | Yes            | No           | No                 | No              |
| No  | Yes  | Yes      | Yes            | No           | No                 | No              |
| Yes | Yes  | Yes      | Yes            | Yes          | No                 | No              |
| Yes | No   | No       | Yes            | Yes          | No                 | No              |
| No  | No   | No       | Yes            | Yes          | No                 | No              |
| No  | No   | Yes      | Yes            | No           | No                 | No              |
| No  | No   | Yes      | No             | No           | No                 | No              |
| No  | No   | Yes      | No             | Yes          | Yes                | No              |
| No  | No   | No       | No             | Yes          | Yes                | No              |
| No  | No   | Yes      | No             | Yes          | No                 | No              |
| No  | No   | Yes      | No             | No           | No                 | Yes             |
| No  | No   | No       | No             | Yes          | No                 | Yes             |
| No  | No   | No       | No             | Yes          | No                 | No              |
| No  | No   | No       | No             | Yes          | No                 | No              |
| No  | No   | Yes      | No             | Yes          | No                 | Yes             |
| No  | No   | Yes      | No             | Yes          | No                 | No              |

|     |     |     |     |     |     |     |
|-----|-----|-----|-----|-----|-----|-----|
| No  | No  | No  | No  | Yes | No  | No  |
| Yes | Yes | Yes | No  | Yes | Yes | No  |
| Yes | Yes | Yes | No  | Yes | Yes | No  |
| No  | No  | Yes | No  | Yes | Yes | No  |
| No  | No  | No  | Yes | No  | No  | No  |
| Yes | Yes | No  | No  | No  | No  | No  |
| No  | No  | Yes | No  | Yes | No  | No  |
| No  | No  | No  | Yes | Yes | No  | No  |
| Yes | No  | Yes | No  | Yes | No  | No  |
| Yes | No  | Yes | Yes | Yes | No  | No  |
| No  | No  | Yes | No  | Yes | No  | No  |
| No  | No  | No  | No  | Yes | No  | No  |
| No  | No  | No  | No  | Yes | No  | No  |
| No  |
| No  | No  | Yes | No  | Yes | Yes | Yes |
| No  | No  | Yes | No  | Yes | Yes | Yes |
| No  | No  | Yes | No  | Yes | No  | No  |
| No  | No  | Yes | No  | No  | No  | No  |
| No  | No  | Yes | No  | Yes | No  | No  |
| No  | No  | No  | No  | Yes | No  | Yes |
| No  | No  | No  | No  | Yes | No  | No  |
| No  | No  | No  | No  | Yes | No  | No  |
| No  | No  | No  | No  | Yes | No  | No  |
| No  | No  | No  | No  | Yes | No  | No  |
| No  | Yes | Yes | No  | Yes | No  | No  |
| No  | Yes | Yes | No  | Yes | No  | No  |
| No  | No  | Yes | No  | Yes | No  | No  |
| No  | No  | Yes | No  | Yes | No  | No  |
| No  | Yes | No  | Yes | No  | No  | No  |
| No  | No  | Yes | Yes | No  | No  | No  |
| Yes | No  | Yes | No  | Yes | Yes | No  |
| Yes | No  | No  | Yes | Yes | Yes | Yes |
| No  | No  | Yes | Yes | Yes | No  | Yes |
| No  | No  | No  | Yes | Yes | Yes | No  |
| No  | No  | No  | No  | Yes | No  | No  |
| Yes | No  | No  | No  | No  | No  | No  |
| Yes | No  | Yes | No  | Yes | No  | No  |
| No  | No  | Yes | No  | Yes | Yes | No  |
| No  | No  | Yes | No  | Yes | Yes | No  |
| Yes | No  | No  | No  | Yes | Yes | No  |
| No  | No  | Yes | No  | Yes | No  | No  |
| No  | No  | Yes | No  | Yes | No  | No  |
| No  | No  | No  | No  | Yes | Yes | No  |
| No  | No  | No  | No  | Yes | No  | No  |
| No  | No  | No  | No  | Yes | No  | No  |
| No  | No  | Yes | No  | Yes | Yes | No  |
| No  |
| No  | No  | Yes | No  | No  | No  | No  |
| No  | No  | Yes | No  | Yes | Yes | No  |
| No  | No  | No  | No  | Yes | Yes | No  |
| No  | No  | No  | Yes | Yes | No  | No  |
| No  | Yes | Yes | No  | Yes | No  | Yes |
| No  | Yes | No  | Yes | Yes | No  | No  |
| No  | No  | Yes | Yes | Yes | No  | Yes |
| No  | No  | Yes | No  | Yes | No  | Yes |



|     |     |     |     |     |     |     |
|-----|-----|-----|-----|-----|-----|-----|
| No  | Yes | Yes | No  | No  | No  | Yes |
| No  | No  | Yes | Yes | Yes | Yes | No  |
| No  | No  | Yes | Yes | Yes | Yes | No  |
| No  | Yes | No  | No  | No  | No  | No  |
| No  | No  | No  | No  | Yes | No  | No  |
| No  | No  | Yes | No  | Yes | No  | No  |
| No  | No  | Yes | Yes | No  | No  | No  |
| No  | No  | Yes | No  | No  | No  | No  |
| No  |
| No  |
| No  |
| No  |
| No  | No  | Yes | No  | No  | Yes | No  |
| Yes | No  | Yes | No  | No  | No  | Yes |
| Yes | No  | Yes | Yes | No  | Yes | No  |
| Yes | No  | Yes | Yes | No  | No  | Yes |
| Yes | No  | No  | No  | No  | No  | No  |
| No  | No  | No  | No  | No  | Yes | No  |
| Yes | Yes | No  | Yes | No  | No  | Yes |
| Yes | No  | No  | Yes | Yes | No  | No  |
| Yes | No  | Yes | No  | No  | No  | No  |
| No  | No  | No  | Yes | No  | No  | No  |
| Yes | Yes | No  | Yes | No  | No  | Yes |
| No  | No  | No  | Yes | No  | No  | No  |
| No  | No  | No  | No  | No  | Yes | No  |
| No  | No  | No  | No  | No  | Yes | No  |
| No  | Yes | Yes | No  | No  | Yes | No  |
| No  | No  | Yes | No  | No  | No  | No  |
| No  | No  | Yes | Yes | No  | No  | No  |
| Yes | Yes | Yes | Yes | No  | No  | No  |
| No  | Yes | Yes | Yes | Yes | No  | No  |
| No  | No  | No  | No  | Yes | No  | No  |
| No  | No  | Yes | No  | No  | No  | No  |
| No  |
| No  |
| No  |
| No  | No  | Yes | Yes | No  | No  | No  |
| No  | No  | Yes | No  | No  | No  | No  |
| No  | No  | No  | Yes | Yes | No  | No  |
| No  | No  | No  | Yes | No  | No  | No  |
| No  | No  | Yes | Yes | No  | No  | No  |
| No  | No  | No  | Yes | No  | No  | No  |
| No  | No  | Yes | No  | No  | No  | No  |
| No  | No  | Yes | Yes | Yes | No  | No  |
| Yes | No  | Yes | No  | No  | No  | No  |
| Yes | No  | No  | No  | No  | No  | Yes |
| No  | No  | Yes | Yes | No  | No  | No  |
| Yes | No  | Yes | Yes | No  | No  | No  |
| No  | No  | No  | Yes | Yes | No  | No  |
| No  | No  | Yes | No  | No  | No  | No  |
| Yes | No  | No  | No  | No  | No  | No  |

|     |     |     |     |     |     |     |
|-----|-----|-----|-----|-----|-----|-----|
| Yes | No  | No  | No  | No  | No  | No  |
| No  |
| No  | No  | Yes | No  | Yes | Yes | No  |
| No  | No  | Yes | Yes | No  | No  | No  |
| No  |
| No  | No  | Yes | No  | No  | No  | No  |
| No  | No  | No  | No  | No  | No  | Yes |
| No  | No  | No  | No  | No  | No  | Yes |
| No  | No  | Yes | Yes | No  | No  | Yes |
| No  | No  | No  | Yes | No  | No  | Yes |
| No  |
| No  |
| No  | No  | No  | Yes | No  | No  | No  |
| No  |
| No  | No  | No  | No  | Yes | Yes | No  |
| No  |
| Yes | No  | No  | Yes | No  | No  | No  |
| No  | No  | No  | Yes | No  | No  | No  |
| No  | Yes | No  | Yes | No  | No  | No  |
| No  | Yes | No  | No  | No  | Yes | No  |
| No  |
| No  | Yes | No  | No  | No  | No  | No  |
| No  | Yes | No  | No  | Yes | Yes | No  |
| No  |
| Yes | No  | No  | Yes | No  | Yes | Yes |
| Yes | Yes | No  | Yes | No  | No  | No  |
| No  | Yes | No  | No  | No  | No  | No  |
| No  | Yes | No  | No  | No  | No  | Yes |
| No  | No  | Yes | No  | No  | Yes | No  |
| No  | No  | Yes | No  | No  | No  | Yes |
| No  | No  | Yes | Yes | No  | No  | No  |
| No  | No  | Yes | No  | No  | Yes | No  |
| No  | No  | Yes | No  | No  | No  | No  |
| No  |
| No  | No  | Yes | No  | Yes | Yes | No  |
| No  | No  | No  | Yes | No  | No  | No  |
| Yes | No  | Yes | No  | No  | No  | No  |
| No  | No  | Yes | Yes | No  | No  | No  |
| No  | No  | Yes | Yes | No  | No  | No  |
| No  |
| No  | No  | No  | Yes | No  | No  | No  |
| No  | No  | Yes | No  | Yes | Yes | No  |
| No  |
| Yes | No  | Yes | No  | No  | No  | No  |
| Yes | No  | No  | No  | No  | No  | No  |
| No  |
| Yes | No  | Yes | Yes | No  | No  | Yes |
| No  | No  | Yes | Yes | No  | No  | Yes |
| No  | No  | No  | Yes | No  | No  | Yes |
| No  | No  | Yes | No  | No  | No  | No  |
| No  | No  | Yes | No  | No  | No  | Yes |
| No  |
| No  | No  | Yes | No  | No  | No  | No  |

|     |     |     |     |     |     |     |
|-----|-----|-----|-----|-----|-----|-----|
| No  | No  | No  | Yes | No  | No  | No  |
| No  |
| No  | No  | No  | Yes | Yes | Yes | No  |
| No  | No  | Yes | Yes | No  | No  | No  |
| No  |
| No  |
| No  | No  | No  | No  | No  | No  | Yes |
| No  | No  | No  | Yes | No  | No  | Yes |
| No  | No  | No  | No  | No  | No  | Yes |
| Yes | Yes | No  | No  | Yes | Yes | No  |
| No  |
| No  | No  | No  | No  | No  | Yes | No  |
| No  | No  | No  | No  | No  | No  | Yes |
| Yes | Yes | No  | No  | No  | No  | Yes |
| Yes | Yes | No  | No  | No  | Yes | No  |
| No  |
| No  | Yes | No  | No  | No  | Yes | No  |
| No  |
| No  |
| No  |
| No  | No  | No  | No  | No  | Yes | No  |
| No  |
| No  | No  | Yes | No  | Yes | No  | No  |
| No  | No  | Yes | No  | No  | Yes | No  |
| No  | No  | Yes | Yes | No  | No  | No  |
| No  | No  | Yes | No  | No  | No  | No  |
| No  | No  | Yes | Yes | No  | No  | No  |
| No  |
| No  |
| No  | No  | Yes | No  | No  | Yes | Yes |
| No  | No  | No  | Yes | No  | No  | No  |
| No  | No  | Yes | Yes | Yes | Yes | No  |
| No  | No  | No  | No  | No  | No  | Yes |
| No  | No  | Yes | Yes | No  | No  | No  |
| Yes | Yes | Yes | No  | No  | Yes | No  |
| Yes | Yes | No  | No  | No  | No  | No  |
| No  | No  | No  | No  | Yes | No  | No  |
| Yes | Yes | Yes | No  | No  | Yes | No  |
| No  |
| No  | No  | Yes | No  | No  | No  | No  |
| No  | No  | Yes | No  | No  | Yes | Yes |
| No  |
| No  | No  | Yes | No  | No  | No  | No  |
| Yes | Yes | Yes | No  | No  | Yes | Yes |
| Yes | Yes | No  | No  | No  | No  | No  |
| No  | No  | Yes | Yes | No  | No  | No  |
| No  | Yes | No  | No  | No  | No  | No  |
| No  |
| No  |
| No  | No  | Yes | Yes | No  | No  | No  |
| No  | No  | No  | No  | Yes | Yes | No  |
| No  |

|     |     |     |     |     |     |     |
|-----|-----|-----|-----|-----|-----|-----|
| Yes | No  | No  | No  | No  | No  | No  |
| Yes | No  | No  | No  | No  | No  | No  |
| No  |
| Yes | No  | No  | No  | No  | No  | No  |
| No  | No  | No  | No  | No  | No  | Yes |
| No  |
| No  | No  | No  | Yes | No  | No  | Yes |
| No  | No  | No  | Yes | Yes | No  | No  |
| No  | No  | No  | No  | No  | Yes | Yes |
| No  | Yes | No  | No  | No  | No  | No  |
| No  | No  | No  | No  | No  | No  | Yes |
| Yes | No  | No  | No  | No  | Yes | No  |
| Yes | No  | No  | No  | No  | No  | Yes |
| No  | No  | No  | Yes | No  | Yes | Yes |
| No  | No  | No  | Yes | No  | No  | No  |
| No  | No  | Yes | Yes | No  | No  | No  |
| No  | No  | Yes | No  | No  | No  | No  |
| No  | No  | Yes | Yes | No  | Yes | No  |
| No  | No  | Yes | Yes | No  | No  | No  |
| No  | No  | Yes | Yes | Yes | No  | No  |
| No  | No  | No  | Yes | No  | Yes | No  |
| No  | No  | No  | Yes | No  | No  | No  |
| No  | No  | Yes | No  | No  | No  | No  |
| No  |
| No  | No  | Yes | No  | No  | No  | No  |
| No  | No  | Yes | Yes | No  | Yes | No  |
| No  | No  | No  | No  | Yes | No  | No  |
| No  | No  | Yes | No  | Yes | No  | No  |
| No  | No  | No  | Yes | No  | Yes | No  |
| No  |
| No  | No  | No  | Yes | No  | No  | No  |
| Yes | Yes | Yes | No  | No  | No  | Yes |
| Yes | Yes | No  | Yes | Yes | Yes | Yes |
| No  | No  | No  | No  | No  | No  | Yes |
| Yes | No  | No  | No  | No  | No  | No  |
| No  |
| No  | No  | No  | Yes | No  | No  | No  |
| No  |
| No  | No  | Yes | No  | Yes | Yes | No  |
| No  | No  | Yes | Yes | Yes | Yes | No  |
| No  |

|     |     |     |     |     |     |     |
|-----|-----|-----|-----|-----|-----|-----|
| No  | No  | Yes | No  | No  | No  | No  |
| No  | No  | Yes | No  | No  | No  | No  |
| No  |
| No  | No  | Yes | No  | No  | No  | No  |
| No  |
| No  | No  | No  | Yes | No  | No  | No  |
| No  |
| Yes | Yes | Yes | No  | No  | No  | No  |
| No  | Yes | Yes | No  | No  | No  | Yes |
| No  | Yes | No  | No  | No  | No  | Yes |
| No  | Yes | Yes | No  | No  | No  | No  |
| No  | Yes | No  | Yes | No  | No  | No  |
| No  | No  | No  | Yes | No  | No  | No  |
| No  | No  | Yes | No  | Yes | No  | No  |
| No  | No  | Yes | No  | No  | Yes | No  |
| No  |
| No  |
| No  | Yes | No  | No  | No  | Yes | No  |
| No  |
| No  | No  | No  | Yes | No  | Yes | No  |
| No  |
| No  | No  | No  | Yes | No  | No  | No  |
| Yes | No  | No  | Yes | No  | No  | No  |
| Yes | No  | No  | No  | No  | Yes | No  |
| No  | No  | No  | Yes | No  | No  | No  |
| No  | No  | No  | Yes | Yes | No  | No  |
| No  | No  | No  | No  | No  | Yes | Yes |
| No  | No  | No  | No  | No  | No  | Yes |
| No  | Yes | No  | No  | No  | No  | Yes |
| No  |
| No  |
| No  | No  | No  | No  | Yes | Yes | No  |
| No  |
| No  |
| No  | No  | No  | No  | No  | Yes | No  |
| No  | No  | No  | Yes | No  | No  | No  |
| Yes | Yes | No  | Yes | No  | Yes | No  |
| Yes | Yes | No  | No  | No  | No  | No  |
| No  | No  | No  | Yes | No  | No  | No  |
| Yes | No  | No  | Yes | No  | No  | No  |
| No  | No  | No  | Yes | No  | Yes | Yes |
| No  |
| No  |
| No  | No  | No  | No  | Yes | Yes | No  |
| No  | No  | No  | No  | Yes | No  | Yes |
| No  |
| No  |
| No  | Yes | No  | Yes | No  | No  | No  |
| Yes | Yes | No  | No  | No  | No  | No  |
| No  | No  | Yes | Yes | No  | No  | No  |
| No  | No  | Yes | No  | No  | No  | No  |
| No  |
| No  | No  | Yes | No  | No  | No  | No  |
| No  | No  | Yes | Yes | No  | Yes | No  |

|     |     |     |     |     |     |     |
|-----|-----|-----|-----|-----|-----|-----|
| No  | No  | No  | Yes | No  | No  | No  |
| No  | No  | Yes | Yes | No  | No  | No  |
| No  | No  | No  | Yes | No  | Yes | No  |
| No  | No  | No  | No  | No  | No  | Yes |
| No  | No  | No  | No  | No  | Yes | Yes |
| Yes | No  | Yes | No  | Yes | No  | Yes |
| No  | No  | Yes | No  | No  | No  | Yes |
| Yes | No  | No  | No  | No  | No  | No  |
| No  | No  | Yes | No  | No  | Yes | No  |
| No  | No  | No  | No  | No  | No  | Yes |
| Yes | No  | No  | No  | No  | No  | No  |
| No  | Yes | Yes | Yes | No  | Yes | No  |
| No  | No  | Yes | No  | Yes | No  | Yes |
| No  | Yes | No  | Yes | Yes | No  | No  |
| No  | Yes | No  | No  | No  | No  | No  |
| No  |
| Yes | Yes | No  | Yes | No  | No  | No  |
| No  |
| No  |
| No  | No  | Yes | No  | No  | No  | No  |
| No  | No  | Yes | No  | No  | No  | No  |
| No  | No  | Yes | No  | No  | No  | No  |
| No  |
| No  | No  | Yes | No  | No  | No  | No  |
| No  |
| No  | No  | Yes | Yes | No  | No  | No  |
| No  | No  | No  | No  | No  | No  | Yes |
| No  | No  | No  | No  | No  | No  | Yes |
| Yes | Yes | No  | No  | Yes | Yes | No  |
| Yes | No  | Yes | Yes | No  | No  | No  |
| No  | No  | Yes | Yes | No  | No  | No  |
| Yes | No  | No  | No  | No  | No  | No  |
| No  | No  | Yes | No  | No  | No  | No  |
| No  |
| No  |
| No  |
| No  | No  | Yes | Yes | No  | No  | No  |
| No  | No  | Yes | No  | No  | No  | No  |
| No  |
| No  |
| No  | No  | Yes | Yes | No  | No  | No  |
| No  | Yes | No  | No  | No  | No  | No  |
| No  | Yes | No  | No  | No  | No  | No  |
| No  | No  | Yes | No  | Yes | Yes | Yes |
| No  | Yes | Yes | No  | No  | No  | No  |
| No  | Yes | No  | Yes | No  | No  | Yes |
| No  | No  | Yes | Yes | No  | No  | Yes |
| No  | No  | Yes | Yes | No  | Yes | No  |
| No  |
| No  | No  | Yes | No  | No  | No  | No  |
| No  | No  | No  | Yes | No  | Yes | No  |

|     |     |     |     |     |     |     |
|-----|-----|-----|-----|-----|-----|-----|
| No  |
| No  | No  | No  | No  | Yes | Yes | No  |
| No  | No  | Yes | Yes | Yes | No  | No  |
| Yes | No  | Yes | No  | No  | No  | Yes |
| Yes | No  | No  | No  | No  | No  | Yes |
| No  | No  | Yes | No  | No  | Yes | Yes |
| No  |
| No  | No  | No  | Yes | No  | No  | No  |
| No  | No  | Yes | Yes | No  | Yes | No  |
| No  | No  | Yes | No  | No  | No  | No  |
| Yes | No  | No  | No  | No  | No  | No  |
| No  |
| No  |
| No  | No  | No  | Yes | No  | No  | No  |
| No  | No  | No  | Yes | No  | No  | No  |
| No  |
| No  |
| No  | No  | No  | No  | Yes | Yes | No  |
| No  |
| No  |
| No  |
| Yes | Yes | No  | Yes | No  | No  | No  |
| Yes | No  | Yes | Yes | No  | No  | No  |
| No  | No  | Yes | No  | No  | No  | No  |
| Yes | No  | No  | Yes | No  | No  | Yes |
| Yes | No  | Yes | No  | No  | No  | No  |
| No  | No  | Yes | No  | No  | No  | No  |
| No  | No  | No  | No  | No  | No  | Yes |
| No  | No  | Yes | No  | No  | No  | Yes |
| No  |
| No  | No  | No  | Yes | Yes | Yes | No  |
| No  |
| No  | No  | Yes | No  | No  | No  | No  |
| No  | No  | Yes | No  | No  | Yes | No  |
| No  | Yes | Yes | Yes | No  | No  | No  |
| No  | No  | No  | Yes | Yes | Yes | No  |
| No  | Yes | No  | No  | No  | No  | No  |
| No  |
| No  |
| No  | Yes | No  | No  | No  | Yes | No  |
| No  | Yes | No  | No  | No  | No  | No  |
| No  | No  | No  | No  | Yes | No  | Yes |
| No  | Yes | No  | No  | No  | Yes | Yes |
| No  |
| No  | No  | No  | Yes | No  | No  | No  |
| No  | No  | No  | Yes | No  | No  | No  |
| No  |
| Yes | Yes | No  | No  | Yes | Yes | No  |
| No  |
| No  | No  | Yes | Yes | No  | No  | No  |
| No  | No  | Yes | Yes | No  | No  | No  |
| No  | No  | No  | Yes | No  | No  | No  |

|     |     |     |     |     |     |     |
|-----|-----|-----|-----|-----|-----|-----|
| No  | No  | Yes | No  | No  | No  | No  |
| No  | No  | Yes | No  | No  | No  | No  |
| No  |
| No  | No  | Yes | No  | No  | No  | No  |
| No  | No  | No  | No  | Yes | No  | No  |
| No  | No  | No  | No  | Yes | Yes | Yes |
| No  | No  | No  | No  | No  | No  | Yes |
| No  | Yes | Yes | Yes | No  | No  | No  |
| No  | Yes | Yes | No  | No  | Yes | No  |
| No  | No  | No  | No  | No  | No  | Yes |
| No  | Yes | Yes | Yes | No  | Yes | Yes |
| No  | No  | No  | No  | No  | No  | Yes |
| Yes | No  | No  | Yes | No  | No  | No  |
| No  | Yes | Yes | Yes | No  | No  | Yes |
| No  | Yes | Yes | No  | No  | Yes | No  |
| No  |
| No  | No  | No  | Yes | No  | No  | No  |
| Yes | No  | No  | Yes | No  | Yes | No  |
| Yes | No  | No  | No  | No  | No  | No  |
| No  |
| No  | No  | No  | No  | Yes | Yes | No  |
| No  |
| No  | No  | Yes | No  | No  | No  | No  |
| Yes | No  | Yes | No  | No  | No  | No  |
| No  |
| No  | No  | Yes | No  | No  | No  | No  |
| No  | No  | Yes | Yes | No  | No  | No  |
| No  | No  | No  | Yes | No  | No  | Yes |
| No  | No  | Yes | Yes | No  | No  | No  |
| No  | No  | No  | No  | No  | No  | Yes |
| No  | Yes | No  | No  | No  | No  | Yes |
| No  | Yes | No  | Yes | No  | No  | Yes |
| No  | No  | Yes | No  | Yes | Yes | Yes |
| No  | No  | Yes | No  | No  | No  | No  |
| No  |
| No  |
| No  | No  | Yes | No  | No  | No  | No  |
| No  | No  | Yes | No  | No  | No  | No  |
| No  | No  | No  | Yes | No  | No  | No  |
| Yes | No  | No  | No  | No  | No  | No  |
| No  | No  | No  | Yes | Yes | Yes | No  |
| No  | No  | No  | Yes | No  | No  | No  |
| No  |
| No  | No  | Yes | No  | No  | No  | No  |
| No  | No  | Yes | No  | No  | Yes | Yes |
| No  |
| No  | No  | No  | No  | No  | Yes | Yes |
| No  | No  | Yes | No  | Yes | No  | Yes |



|     |     |     |     |     |     |     |
|-----|-----|-----|-----|-----|-----|-----|
| No  | No  | Yes | No  | No  | No  | Yes |
| No  | No  | No  | Yes | No  | No  | Yes |
| No  | No  | Yes | Yes | No  | Yes | No  |
| No  | Yes | No  | Yes | No  | No  | No  |
| Yes | Yes | No  | No  | No  | No  | No  |
| No  | No  | No  | No  | No  | Yes | No  |
| No  | Yes | Yes | No  | No  | No  | No  |
| Yes | No  | Yes | No  | No  | No  | No  |
| Yes | No  | No  | Yes | Yes | Yes | No  |
| No  | No  | Yes | No  | Yes | Yes | No  |
| No  | No  | No  | Yes | No  | No  | No  |
| No  |
| Yes | No  | Yes | No  | No  | No  | No  |
| Yes | No  | Yes | No  | No  | No  | No  |
| No  | No  | No  | Yes | No  | No  | No  |
| No  |
| No  | No  | No  | Yes | No  | No  | No  |
| No  |
| No  | No  | No  | Yes | No  | No  | Yes |
| No  | No  | No  | Yes | No  | No  | Yes |
| No  | Yes | Yes | No  | No  | No  | No  |
| No  | No  | Yes | Yes | No  | No  | Yes |
| No  | Yes | No  | No  | No  | No  | Yes |
| No  | No  | Yes | No  | No  | No  | No  |
| No  | No  | Yes | No  | Yes | Yes | No  |
| Yes | No  | No  | Yes | No  | No  | No  |
| No  | Yes | Yes | Yes | No  | No  | No  |
| No  | Yes | No  | Yes | No  | Yes | No  |
| Yes | No  | No  | Yes | No  | No  | No  |
| No  | Yes | No  | No  | No  | Yes | No  |
| No  | No  | Yes | No  | No  | No  | No  |
| No  | No  | No  | Yes | No  | No  | No  |
| No  |
| No  |
| No  | No  | No  | No  | Yes | No  | No  |
| No  | Yes | No  | Yes | No  | Yes | No  |
| No  | Yes | No  | Yes | No  | No  | No  |
| No  | No  | No  | Yes | No  | No  | No  |
| No  | Yes | No  | No  | No  | Yes | No  |
| No  | Yes | No  | No  | No  | No  | No  |
| No  | No  | No  | No  | No  | Yes | No  |
| No  | Yes | No  | Yes | No  | No  | No  |
| No  |
| No  |
| No  | No  | No  | No  | No  | Yes | No  |
| Yes | Yes | No  | No  | No  | No  | No  |

|     |     |     |     |     |     |     |
|-----|-----|-----|-----|-----|-----|-----|
| Yes | Yes | No  | Yes | No  | No  | Yes |
| No  | No  | No  | No  | No  | Yes | No  |
| No  | Yes | No  | Yes | No  | No  | No  |
| No  |
| No  | No  | No  | No  | Yes | Yes | Yes |
| No  | Yes | No  | No  | No  | No  | No  |
| Yes | Yes | No  | Yes | No  | No  | No  |
| No  |
| No  | No  | No  | No  | No  | No  | Yes |
| No  | No  | No  | Yes | No  | No  | Yes |
| No  | No  | No  | No  | Yes | Yes | No  |
| No  |
| No  |
| No  | Yes | No  | Yes | No  | No  | No  |
| No  | Yes | No  | No  | No  | No  | No  |
| No  | No  | No  | Yes | No  | No  | No  |
| No  | No  | No  | Yes | No  | No  | No  |
| No  |
| No  | No  | No  | Yes | No  | No  | No  |
| No  | No  | No  | No  | Yes | No  | No  |
| Yes | Yes | No  | No  | Yes | Yes | No  |
| No  | Yes | No  | No  | No  | No  | No  |
| No  | No  | No  | Yes | No  | No  | Yes |
| No  | Yes | No  | Yes | No  | Yes | No  |
| Yes | Yes | Yes | No  | No  | No  | Yes |
| No  | No  | Yes | No  | No  | Yes | No  |
| Yes | Yes | No  | No  | No  | No  | Yes |
| No  |
| No  |
| No  | No  | No  | No  | No  | Yes | No  |
| Yes | Yes | Yes | Yes | No  | No  | No  |
| No  | Yes | No  | No  | No  | No  | No  |
| No  | No  | No  | No  | No  | Yes | No  |
| No  | Yes | No  | No  | No  | No  | No  |
| No  | No  | Yes | No  | No  | No  | No  |
| No  | No  | Yes | No  | Yes | Yes | No  |
| Yes | Yes | No  | No  | No  | No  | No  |
| No  | No  | Yes | No  | No  | No  | No  |
| No  |
| No  | No  | No  | Yes | No  | No  | Yes |
| Yes | No  | Yes | No  | No  | No  | No  |
| Yes | No  | Yes | Yes | No  | No  | No  |
| Yes | No  | No  | No  | No  | No  | No  |
| Yes | No  | No  | Yes | No  | No  | No  |
| No  | No  | No  | Yes | No  | No  | No  |
| No  |
| No  | No  | No  | No  | Yes | No  | No  |
| No  | No  | No  | No  | No  | Yes | No  |
| No  | No  | No  | Yes | No  | No  | Yes |
| No  | No  | No  | Yes | No  | No  | No  |
| No  | No  | No  | Yes | No  | Yes | No  |
| No  |
| No  | No  | No  | No  | Yes | Yes | Yes |

|     |     |     |     |     |     |     |
|-----|-----|-----|-----|-----|-----|-----|
| No  |
| Yes | No  | No  | No  | No  | No  | No  |
| Yes | No  | No  | No  | No  | No  | No  |
| Yes | No  | No  | No  | No  | Yes | Yes |
| Yes | Yes | No  | No  | No  | No  | No  |
| Yes | Yes | No  | No  | No  | No  | No  |
| No  | No  | Yes | No  | No  | Yes | No  |
| No  | Yes | No  | No  | Yes | No  | No  |
| No  | Yes | No  | No  | No  | No  | No  |
| No  | No  | Yes | No  | No  | Yes | No  |
| No  | Yes | No  | No  | No  | No  | No  |
| Yes | No  | No  | No  | No  | No  | No  |
| Yes | Yes | No  | No  | No  | Yes | No  |
| No  | No  | No  | No  | Yes | No  | No  |
| No  | No  | No  | Yes | No  | No  | No  |
| No  |
| No  | No  | Yes | No  | No  | No  | Yes |
| No  | No  | Yes | Yes | No  | Yes | Yes |
| No  | No  | No  | Yes | No  | No  | Yes |
| Yes | No  | Yes | Yes | No  | No  | No  |
| No  | No  | No  | No  | No  | Yes | Yes |
| No  |
| Yes | No  | Yes | Yes | Yes | No  | No  |
| No  |
| No  |
| No  | Yes | No  | No  | No  | No  | No  |
| No  |
| No  |
| No  | Yes | No  | No  | No  | No  | No  |
| No  | Yes | No  | No  | No  | No  | No  |
| No  | Yes | Yes | No  | No  | No  | No  |
| No  |
| Yes | No  | No  | No  | No  | No  | No  |
| Yes | No  | No  | No  | No  | No  | Yes |
| Yes | No  | No  | No  | Yes | Yes | No  |
| Yes | No  | Yes | Yes | No  | No  | Yes |
| Yes | No  | No  | Yes | No  | No  | No  |
| No  | No  | Yes | Yes | No  | No  | No  |
| No  | No  | No  | No  | Yes | Yes | No  |
| No  |
| No  | No  | No  | Yes | No  | No  | No  |
| No  |
| Yes | No  | No  | Yes | No  | No  | No  |
| Yes | No  | No  | No  | No  | No  | No  |
| Yes | No  | No  | No  | Yes | Yes | No  |
| Yes | No  | No  | No  | No  | No  | No  |
| No  | No  | Yes | No  | No  | No  | No  |
| Yes | Yes | Yes | No  | No  | No  | No  |
| No  | Yes | No  | No  | No  | No  | No  |
| No  | Yes | No  | No  | No  | No  | Yes |

|     |     |     |     |     |     |     |
|-----|-----|-----|-----|-----|-----|-----|
| No  |
| No  |
| No  | No  | No  | No  | No  | No  | Yes |
| No  | No  | No  | No  | Yes | No  | No  |
| Yes | No  | No  | No  | Yes | Yes | No  |
| No  | Yes | No  | No  | No  | No  | No  |
| No  | No  | Yes | No  | No  | No  | Yes |
| No  | Yes | Yes | No  | No  | Yes | Yes |
| No  | No  | No  | No  | No  | No  | Yes |
| No  | Yes | Yes | Yes | No  | Yes | No  |
| Yes | No  | No  | No  | No  | No  | No  |
| Yes | No  | No  | Yes | No  | No  | No  |
| Yes | Yes | No  | No  | No  | No  | Yes |
| Yes | No  | No  | No  | No  | Yes | No  |
| No  | No  | No  | Yes | No  | No  | Yes |
| No  | No  | Yes | No  | No  | No  | No  |
| No  | No  | No  | No  | No  | Yes | No  |
| Yes | No  | No  | Yes | No  | No  | No  |
| Yes | No  | Yes | Yes | No  | No  | No  |
| No  | No  | No  | Yes | Yes | Yes | No  |
| No  |
| No  |
| No  |
| No  |
| No  |
| No  |
| No  | No  | No  | No  | Yes | Yes | No  |
| No  |
| Yes | No  | Yes | Yes | No  | No  | No  |
| Yes | No  | Yes | Yes | No  | No  | No  |
| Yes | No  | No  | No  | No  | No  | Yes |
| Yes | No  | No  | No  | No  | No  | Yes |
| No  | No  | No  | Yes | No  | No  | Yes |
| Yes | Yes | Yes | No  | No  | No  | Yes |
| Yes | Yes | Yes | No  | Yes | Yes | No  |
| No  | No  | No  | No  | Yes | No  | No  |
| No  | No  | No  | No  | No  | No  | Yes |
| No  | No  | No  | No  | No  | Yes | Yes |
| No  |
| No  |
| No  |
| No  | No  | No  | No  | No  | Yes | No  |
| No  |
| No  |
| No  | No  | No  | Yes | No  | Yes | No  |
| No  | No  | Yes | Yes | No  | No  | No  |
| No  |
| Yes | No  | No  | Yes | No  | No  | Yes |
| Yes | No  | No  | No  | Yes | Yes | No  |
| No  | No  | Yes | Yes | No  | No  | Yes |
| No  | No  | No  | No  | No  | No  | Yes |
| No  | No  | No  | Yes | No  | No  | No  |

|     |     |     |     |     |     |     |
|-----|-----|-----|-----|-----|-----|-----|
| Yes | Yes | No  | No  | No  | No  | Yes |
| No  |
| No  | No  | No  | Yes | No  | No  | Yes |
| Yes | No  | No  | Yes | No  | No  | No  |
| No  | Yes | Yes | Yes | No  | No  | Yes |
| No  | Yes | No  | No  | No  | No  | Yes |
| No  | No  | No  | No  | No  | No  | Yes |
| No  |
| No  | No  | No  | No  | Yes | Yes | No  |
| No  |
| No  |
| No  |
| No  |
| No  | No  | Yes | No  | No  | No  | No  |
| No  | No  | Yes | Yes | No  | No  | No  |
| No  | No  | Yes | Yes | Yes | Yes | No  |
| Yes | No  | No  | Yes | No  | No  | No  |
| Yes | No  | No  | Yes | No  | No  | No  |
| No  |
| No  | No  | No  | No  | Yes | No  | No  |
| No  | No  | Yes | No  | No  | Yes | No  |
| Yes | No  | No  | Yes | No  | No  | Yes |
| No  | No  | No  | Yes | No  | No  | Yes |
| No  | No  | No  | Yes | No  | Yes | Yes |
| No  |
| Yes | Yes | No  | No  | Yes | Yes | No  |
| No  | Yes | No  | No  | No  | No  | No  |
| No  |
| No  | Yes | Yes | No  | No  | No  | No  |
| No  | Yes | No  | No  | No  | Yes | No  |
| No  |
| Yes | No  | No  | No  | No  | No  | No  |
| No  | Yes | Yes | No  | No  | Yes | No  |
| No  |
| No  | No  | No  | No  | Yes | No  | No  |
| No  | No  | No  | No  | Yes | Yes | No  |
| No  | No  | No  | Yes | No  | No  | No  |
| No  |
| No  | No  | No  | Yes | No  | No  | No  |
| No  | No  | Yes | Yes | No  | No  | No  |
| Yes | No  | No  | No  | No  | No  | Yes |
| Yes | No  | No  | Yes | No  | No  | Yes |
| No  | No  | No  | No  | No  | No  | Yes |
| No  | Yes | No  | No  | No  | No  | No  |
| No  | Yes | No  | Yes | No  | No  | No  |
| No  | No  | No  | Yes | No  | No  | No  |
| No  | No  | No  | Yes | No  | No  | No  |
| No  |
| No  | Yes | No  | No  | No  | No  | No  |
| No  |
| No  | No  | No  | No  | Yes | No  | No  |
| No  | No  | No  | No  | No  | Yes | No  |
| No  |
| Yes | No  | No  | No  | No  | No  | No  |
| No  | Yes | Yes | No  | Yes | Yes | No  |

|     |     |     |     |     |     |     |
|-----|-----|-----|-----|-----|-----|-----|
| No  | Yes | Yes | No  | No  | No  | No  |
| No  | No  | Yes | No  | No  | Yes | No  |
| Yes | Yes | No  | No  | No  | No  | No  |
| Yes | Yes | No  | No  | No  | No  | Yes |
| No  | No  | No  | No  | No  | No  | Yes |
| Yes | No  | No  | No  | Yes | Yes | Yes |
| No  | No  | Yes | Yes | No  | No  | No  |
| No  | No  | No  | Yes | No  | No  | No  |
| Yes | No  | No  | No  | No  | Yes | No  |
| No  |
| Yes | No  | No  | No  | No  | No  | No  |
| No  |
| No  |
| No  |
| No  |
| Yes | No  | Yes | No  | Yes | Yes | No  |
| No  | No  | No  | No  | Yes | Yes | No  |
| No  |
| No  | Yes | No  | No  | No  | No  | No  |
| No  | No  | Yes | No  | No  | No  | No  |
| No  | Yes | No  | No  | No  | No  | No  |
| No  |
| No  |
| No  |
| No  | Yes | No  | No  | No  | No  | No  |
| No  | No  | No  | No  | No  | No  | Yes |
| Yes | Yes | No  | Yes | No  | No  | Yes |
| Yes | No  | Yes | Yes | No  | No  | No  |
| Yes | No  | No  | No  | No  | No  | No  |
| No  | Yes | No  | No  | No  | No  | No  |
| No  | Yes | No  | Yes | No  | No  | Yes |
| No  | Yes | No  | No  | No  | No  | No  |
| No  | No  | No  | No  | Yes | No  | No  |
| No  |
| No  |
| No  | No  | No  | No  | No  | Yes | No  |
| No  |
| No  | No  | No  | No  | No  | Yes | No  |
| No  | No  | No  | No  | No  | No  | Yes |
| Yes | No  | No  | No  | No  | No  | Yes |
| No  |
| No  | No  | No  | No  | No  | Yes | No  |
| No  |
| Yes | No  | No  | No  | Yes | No  | No  |
| No  | Yes | No  | No  | No  | Yes | No  |
| No  | No  | Yes | No  | No  | No  | No  |
| Yes | Yes | Yes | Yes | Yes | No  | No  |
| No  | No  | No  | Yes | No  | No  | No  |
| No  | No  | No  | No  | Yes | No  | Yes |
| No  | No  | Yes | No  | Yes | Yes | Yes |
| No  | No  | Yes | No  | No  | No  | Yes |
| No  | No  | Yes | No  | No  | Yes | Yes |
| No  |
| No  |
| No  | No  | Yes | No  | No  | No  | No  |



|     |     |     |     |     |     |     |
|-----|-----|-----|-----|-----|-----|-----|
| No  |
| No  |
| No  | Yes | No  | Yes | No  | No  | Yes |
| No  | Yes | No  | No  | No  | No  | No  |
| No  | Yes | No  | No  | No  | Yes | No  |
| No  | No  | No  | No  | No  | Yes | No  |
| Yes | No  | No  | No  | No  | No  | No  |
| No  | No  | No  | No  | Yes | No  | Yes |
| Yes | No  | No  | No  | Yes | No  | No  |
| Yes | No  | No  | No  | No  | No  | No  |
| No  | Yes | No  | No  | No  | No  | No  |
| No  | Yes | Yes | No  | Yes | No  | No  |
| No  |
| No  | Yes | No  | No  | No  | No  | No  |
| Yes | Yes | No  | No  | No  | No  | No  |
| No  | Yes | No  | No  | No  | No  | No  |
| Yes | No  | No  | No  | No  | No  | No  |
| Yes | Yes | No  | No  | Yes | No  | No  |
| Yes | No  | No  | No  | No  | No  | No  |
| No  |
| Yes | Yes | No  | No  | Yes | No  | No  |
| Yes | No  | No  | Yes | No  | No  | No  |
| No  | Yes | No  | No  | No  | Yes | No  |
| No  | No  | No  | No  | No  | No  | Yes |
| No  |
| No  |
| No  |
| No  |
| No  | No  | Yes | No  | No  | No  | No  |
| No  | No  | No  | Yes | No  | No  | No  |
| No  | No  | No  | Yes | No  | No  | No  |
| No  |
| No  | No  | No  | Yes | No  | No  | No  |
| No  | No  | No  | Yes | No  | No  | No  |
| No  |
| No  | No  | No  | Yes | No  | No  | No  |
| Yes | No  | No  | Yes | No  | No  | No  |
| No  | No  | No  | No  | No  | Yes | No  |
| Yes | No  | No  | No  | Yes | Yes | No  |
| Yes | No  | No  | No  | No  | Yes | Yes |
| Yes | No  | No  | No  | Yes | No  | No  |
| No  | No  | No  | Yes | No  | No  | Yes |
| No  | No  | No  | No  | Yes | No  | No  |
| Yes | No  | No  | No  | Yes | No  | No  |
| No  | No  | Yes | No  | Yes | No  | No  |
| Yes | No  | Yes | No  | No  | No  | No  |
| Yes | No  | No  | No  | Yes | No  | No  |
| No  | No  | Yes | No  | No  | No  | No  |
| No  |
| Yes | No  | Yes | No  | No  | No  | No  |
| No  |
| No  |
| No  |



|     |     |     |     |     |     |     |
|-----|-----|-----|-----|-----|-----|-----|
| No  |
| No  | Yes | No  | No  | No  | No  | No  |
| No  | No  | Yes | No  | No  | No  | No  |
| No  |
| No  | No  | No  | Yes | No  | No  | Yes |
| No  | No  | No  | Yes | No  | Yes | Yes |
| No  | Yes | No  | No  | No  | No  | No  |
| No  | Yes | No  | Yes | No  | Yes | Yes |
| No  | No  | No  | Yes | Yes | Yes | No  |
| No  | Yes | No  | No  | Yes | No  | No  |
| No  | No  | No  | No  | No  | Yes | No  |
| No  |
| No  |
| No  |
| No  | No  | Yes | No  | No  | No  | No  |
| Yes | No  | Yes | No  | No  | No  | No  |
| No  |
| Yes | No  | Yes | No  | No  | Yes | No  |
| No  |
| Yes | No  | No  | No  | No  | No  | No  |
| No  |
| No  |
| Yes | No  | Yes | Yes | No  | No  | No  |
| No  |
| Yes | Yes | Yes | Yes | No  | No  | Yes |
| No  | Yes | Yes | Yes | No  | No  | No  |
| Yes | No  | No  | No  | Yes | No  | No  |
| Yes | No  | No  | No  | No  | No  | No  |
| Yes | Yes | No  | No  | No  | Yes | No  |
| No  | No  | No  | No  | No  | Yes | No  |
| No  | Yes | No  | No  | No  | No  | No  |
| No  | Yes | No  | Yes | Yes | Yes | No  |
| No  | Yes | No  | No  | Yes | No  | No  |
| No  | No  | No  | Yes | No  | Yes | No  |
| No  | Yes | No  | No  | Yes | No  | No  |
| No  | No  | No  | No  | No  | Yes | No  |
| No  | Yes | No  | No  | No  | Yes | No  |
| No  | No  | Yes | No  | Yes | No  | No  |
| No  | No  | No  | No  | Yes | Yes | No  |
| No  |
| Yes | No  | No  | No  | Yes | Yes | No  |
| No  |
| No  |
| Yes | Yes | Yes | No  | No  | No  | Yes |
| Yes | Yes | No  | No  | Yes | No  | No  |
| No  | No  | No  | No  | Yes | No  | No  |
| Yes | No  | No  | No  | No  | No  | Yes |
| Yes | No  | Yes | No  | No  | No  | Yes |
| Yes | No  | No  | No  | No  | No  | No  |
| No  |
| No  |
| No  | No  | No  | No  | No  | No  | Yes |
| No  |
| No  |
| No  |

|     |     |     |     |     |     |     |
|-----|-----|-----|-----|-----|-----|-----|
| No  | No  | No  | Yes | No  | No  | No  |
| No  | No  | No  | Yes | No  | No  | No  |
| No  | No  | No  | Yes | No  | No  | No  |
| No  |
| No  | No  | No  | Yes | No  | No  | No  |
| No  | No  | No  | Yes | Yes | No  | No  |
| No  | No  | No  | No  | No  | Yes | No  |
| Yes | No  | No  | No  | No  | No  | No  |
| Yes | No  | No  | Yes | No  | No  | No  |
| Yes | No  | No  | No  | No  | Yes | No  |
| No  | No  | No  | No  | Yes | No  | No  |
| Yes | No  | No  | No  | No  | No  | No  |
| No  | Yes | Yes | No  | No  | No  | No  |
| Yes | Yes | No  | No  | No  | No  | No  |
| Yes | Yes | No  | No  | No  | No  | No  |
| Yes | No  | No  | No  | No  | No  | No  |
| No  |
| No  | No  | No  | No  | No  | No  | Yes |
| Yes | No  | No  | No  | No  | No  | No  |
| No  | Yes | No  | No  | No  | No  | Yes |
| No  | Yes | No  | No  | No  | No  | No  |
| Yes | Yes | No  | No  | No  | No  | Yes |
| Yes | No  | No  | No  | No  | No  | No  |
| No  | Yes | No  | No  | No  | No  | No  |
| Yes | Yes | No  | No  | No  | No  | Yes |
| Yes | Yes | No  | Yes | Yes | No  | No  |
| No  | No  | Yes | No  | No  | No  | No  |
| No  | No  | No  | No  | Yes | No  | No  |
| No  | No  | Yes | No  | Yes | No  | No  |
| No  | No  | No  | Yes | No  | Yes | No  |
| No  | No  | No  | Yes | No  | Yes | Yes |
| No  | No  | No  | Yes | Yes | No  | Yes |
| No  | No  | Yes | No  | No  | No  | Yes |
| No  | No  | No  | No  | No  | Yes | No  |
| No  |
| No  |
| No  |
| No  | No  | No  | No  | No  | Yes | No  |
| No  | Yes | No  | No  | No  | Yes | No  |
| No  | No  | No  | No  | No  | Yes | No  |
| No  | Yes | No  | No  | No  | Yes | No  |
| No  |
| No  | No  | Yes | No  | No  | Yes | No  |
| No  |
| No  | Yes | No  | No  | Yes | No  | No  |
| Yes | No  | Yes | No  | Yes | No  | No  |
| Yes | Yes | No  | No  | Yes | No  | No  |
| No  | No  | Yes | No  | Yes | No  | No  |
| No  | Yes | Yes | Yes | No  | No  | No  |
| No  | Yes | No  | No  | No  | No  | No  |
| Yes | Yes | Yes | No  | No  | No  | Yes |
| No  | Yes | Yes | No  | No  | No  | Yes |
| No  | No  | No  | No  | No  | No  | Yes |

|     |     |     |     |     |     |     |
|-----|-----|-----|-----|-----|-----|-----|
| No  | Yes | No  | No  | No  | No  | Yes |
| No  | Yes | No  | No  | No  | No  | Yes |
| Yes | Yes | No  | No  | No  | No  | No  |
| No  | No  | No  | No  | No  | No  | Yes |
| No  |
| No  | No  | No  | No  | No  | No  | Yes |
| No  | No  | No  | No  | No  | No  | Yes |
| No  | No  | No  | No  | No  | Yes | No  |
| No  | No  | No  | No  | No  | Yes | No  |
| No  |
| No  | No  | No  | No  | No  | Yes | Yes |
| No  | No  | No  | No  | No  | No  | Yes |
| No  | No  | No  | No  | Yes | No  | No  |
| No  |
| No  |
| No  | No  | No  | Yes | Yes | No  | No  |
| No  | No  | Yes | Yes | No  | No  | No  |
| No  | No  | Yes | Yes | No  | No  | No  |
| No  | No  | Yes | No  | No  | No  | No  |
| No  | No  | No  | Yes | Yes | No  | No  |
| No  | No  | No  | Yes | No  | No  | No  |
| No  |
| Yes | Yes | No  | No  | No  | No  | No  |
| No  | Yes | No  | No  | No  | No  | No  |
| No  | Yes | No  | No  | No  | No  | No  |
| No  |
| No  | No  | No  | No  | No  | Yes | No  |
| No  | No  | No  | No  | No  | Yes | No  |
| No  | No  | No  | No  | No  | Yes | No  |
| No  | No  | No  | No  | No  | Yes | Yes |
| No  |
| No  | No  | No  | Yes | No  | Yes | No  |
| No  | No  | No  | No  | No  | Yes | No  |
| Yes | No  | Yes | Yes | No  | Yes | No  |
| No  |
| Yes | No  | Yes | Yes | No  | No  | No  |
| No  |
| Yes | No  | No  | No  | No  | No  | No  |
| Yes | No  | Yes | No  | No  | No  | No  |
| Yes | No  | No  | No  | No  | Yes | No  |
| No  | No  | No  | No  | Yes | No  | No  |
| Yes | No  | Yes | No  | No  | No  | No  |
| No  | Yes | No  | No  | Yes | No  | No  |
| No  | No  | No  | No  | Yes | No  | No  |
| Yes | Yes | No  | No  | Yes | No  | No  |
| No  | Yes | No  | No  | No  | No  | No  |
| Yes | Yes | No  | No  | Yes | No  | No  |
| No  |
| Yes | Yes | No  | No  | No  | No  | No  |
| Yes | No  | No  | No  | No  | No  | No  |
| No  | No  | No  | Yes | Yes | No  | Yes |
| No  | No  | No  | Yes | No  | No  | No  |
| No  | Yes | No  | No  | No  | No  | Yes |
| No  | No  | No  | No  | No  | Yes | Yes |
| No  | No  | No  | No  | No  | Yes | Yes |
| No  | No  | No  | No  | No  | No  | Yes |

|     |     |     |     |     |     |     |
|-----|-----|-----|-----|-----|-----|-----|
| No  |
| No  | No  | No  | Yes | No  | No  | No  |
| No  | No  | No  | No  | No  | Yes | No  |
| No  | No  | Yes | No  | No  | No  | Yes |
| No  | No  | No  | Yes | No  | No  | No  |
| No  | No  | Yes | Yes | No  | No  | Yes |
| No  | No  | No  | Yes | No  | No  | Yes |
| No  | No  | No  | Yes | No  | No  | No  |
| No  | No  | No  | Yes | No  | No  | No  |
| No  | No  | Yes | No  | No  | No  | No  |
| No  | No  | No  | No  | No  | No  | Yes |
| No  | No  | No  | No  | Yes | No  | No  |
| No  | No  | Yes | No  | Yes | No  | No  |
| Yes | No  | Yes | Yes | Yes | No  | No  |
| No  | Yes | No  | No  | No  | No  | No  |
| No  | Yes | No  | Yes | No  | No  | No  |
| Yes | No  | No  | No  | No  | No  | No  |
| Yes | No  | No  | No  | No  | No  | No  |
| Yes | No  | No  | No  | No  | Yes | No  |
| No  |
| No  | No  | No  | No  | No  | Yes | No  |
| No  | No  | No  | No  | No  | Yes | No  |
| No  |
| No  | No  | No  | No  | No  | Yes | No  |
| No  |
| No  | No  | Yes | No  | No  | Yes | No  |
| No  | No  | Yes | No  | No  | Yes | No  |
| No  | No  | No  | No  | No  | Yes | No  |
| No  | No  | No  | No  | No  | No  | Yes |
| No  | No  | No  | No  | No  | No  | Yes |
| No  | No  | No  | Yes | No  | No  | No  |
| No  | No  | Yes | No  | No  | No  | No  |
| No  | No  | Yes | No  | No  | Yes | No  |
| No  |
| No  |
| No  |
| No  | No  | No  | No  | Yes | No  | No  |
| No  |
| Yes | No  | No  | No  | Yes | No  | No  |
| No  |
| Yes | No  | No  | No  | Yes | No  | No  |
| No  | No  | No  | No  | No  | No  | Yes |
| No  |
| No  | No  | No  | No  | Yes | No  | No  |
| No  | No  | No  | Yes | No  | No  | No  |
| No  |
| No  | No  | No  | Yes | No  | No  | No  |
| No  |
| No  | No  | No  | Yes | No  | No  | No  |
| No  |
| No  | No  | No  | No  | No  | No  | Yes |

|     |     |     |     |     |     |     |
|-----|-----|-----|-----|-----|-----|-----|
| No  | No  | No  | No  | Yes | No  | No  |
| No  | No  | No  | Yes | No  | No  | No  |
| No  | Yes | No  | No  | No  | No  | No  |
| No  | No  | No  | No  | No  | Yes | No  |
| No  | Yes | No  | No  | No  | Yes | No  |
| No  |
| No  | Yes | Yes | No  | No  | No  | No  |
| No  | Yes | Yes | No  | No  | No  | No  |
| Yes | Yes | No  | No  | No  | No  | No  |
| Yes | No  | Yes | No  | No  | No  | No  |
| No  |
| No  | No  | Yes | No  | No  | No  | No  |
| No  |
| No  | Yes | No  | No  | No  | No  | No  |
| No  |
| No  |
| No  |
| No  | No  | No  | No  | Yes | No  | No  |
| No  | No  | No  | Yes | No  | No  | No  |
| No  | No  | No  | Yes | No  | No  | Yes |
| No  | No  | No  | Yes | Yes | No  | No  |
| No  |
| No  |
| No  | No  | No  | Yes | No  | Yes | No  |
| No  | No  | No  | Yes | No  | Yes | No  |
| No  | No  | Yes | No  | No  | Yes | No  |
| No  | No  | Yes | No  | No  | No  | Yes |
| No  | No  | Yes | No  | No  | No  | No  |
| No  |
| Yes | No  | No  | No  | No  | No  | No  |
| No  |
| Yes | Yes | No  | No  | No  | No  | No  |
| No  |
| No  |
| No  | No  | No  | No  | Yes | No  | No  |
| No  | No  | No  | No  | Yes | No  | No  |
| No  |
| No  |
| No  | No  | No  | No  | No  | Yes | No  |
| No  | No  | No  | No  | No  | Yes | No  |
| No  | No  | No  | No  | No  | Yes | No  |
| No  | No  | Yes | No  | No  | No  | Yes |
| No  |
| No  | Yes | No  | No  | No  | No  | No  |
| No  |
| Yes | No  | No  | Yes | No  | No  | No  |
| No  |
| No  |
| Yes | No  | No  | No  | No  | No  | No  |
| Yes | No  | Yes | No  | No  | No  | Yes |

| Blood Transfusion | Surgery type         | CVC | Surgical procedure   | Emergency Surgery |
|-------------------|----------------------|-----|----------------------|-------------------|
| No                | Laparoscopic surgery | Yes | Proximal gastrectomy | Yes               |
| Yes               | Laparoscopic surgery | No  | Distal gastrectomy   | No                |
| Yes               | Open surgery         | Yes | Total gastrectomy    | No                |
| No                | Laparoscopic surgery | No  | Total gastrectomy    | Yes               |
| Yes               | Open surgery         | Yes | Distal gastrectomy   | Yes               |
| Yes               | Open surgery         | Yes | Distal gastrectomy   | Yes               |
| No                | Laparoscopic surgery | Yes | Proximal gastrectomy | Yes               |
| No                | Laparoscopic surgery | Yes | Proximal gastrectomy | Yes               |
| No                | Laparoscopic surgery | Yes | Distal gastrectomy   | No                |
| Yes               | Open surgery         | Yes | Distal gastrectomy   | No                |
| Yes               | Laparoscopic surgery | Yes | Distal gastrectomy   | Yes               |
| No                | Open surgery         | No  | Proximal gastrectomy | Yes               |
| Yes               | Laparoscopic surgery | Yes | Total gastrectomy    | No                |
| Yes               | Open surgery         | Yes | Distal gastrectomy   | Yes               |
| Yes               | Laparoscopic surgery | No  | Proximal gastrectomy | Yes               |
| No                | Open surgery         | No  | Total gastrectomy    | Yes               |
| Yes               | Open surgery         | No  | Total gastrectomy    | Yes               |
| Yes               | Open surgery         | No  | Proximal gastrectomy | Yes               |
| No                | Open surgery         | Yes | Distal gastrectomy   | Yes               |
| Yes               | Open surgery         | Yes | Total gastrectomy    | No                |
| No                | Laparoscopic surgery | Yes | Distal gastrectomy   | Yes               |
| No                | Open surgery         | Yes | Distal gastrectomy   | No                |
| No                | Laparoscopic surgery | No  | Distal gastrectomy   | No                |
| Yes               | Laparoscopic surgery | No  | Distal gastrectomy   | No                |
| Yes               | Laparoscopic surgery | Yes | Total gastrectomy    | Yes               |
| Yes               | Open surgery         | No  | Total gastrectomy    | Yes               |
| No                | Open surgery         | Yes | Distal gastrectomy   | Yes               |
| Yes               | Laparoscopic surgery | No  | Proximal gastrectomy | Yes               |
| No                | Open surgery         | Yes | Distal gastrectomy   | Yes               |
| Yes               | Laparoscopic surgery | Yes | Proximal gastrectomy | Yes               |
| No                | Laparoscopic surgery | Yes | Proximal gastrectomy | Yes               |
| No                | Open surgery         | Yes | Distal gastrectomy   | Yes               |
| No                | Laparoscopic surgery | No  | Total gastrectomy    | Yes               |
| Yes               | Open surgery         | No  | Total gastrectomy    | Yes               |
| Yes               | Open surgery         | Yes | Distal gastrectomy   | No                |
| No                | Laparoscopic surgery | Yes | Total gastrectomy    | Yes               |
| Yes               | Open surgery         | Yes | Distal gastrectomy   | No                |
| Yes               | Laparoscopic surgery | Yes | Proximal gastrectomy | No                |
| No                | Open surgery         | Yes | Proximal gastrectomy | Yes               |
| No                | Open surgery         | No  | Distal gastrectomy   | No                |
| No                | Open surgery         | Yes | Total gastrectomy    | No                |
| Yes               | Laparoscopic surgery | Yes | Total gastrectomy    | No                |
| Yes               | Laparoscopic surgery | No  | Total gastrectomy    | Yes               |
| No                | Laparoscopic surgery | No  | Total gastrectomy    | Yes               |
| Yes               | Laparoscopic surgery | No  | Distal gastrectomy   | Yes               |
| Yes               | Open surgery         | Yes | Distal gastrectomy   | Yes               |
| Yes               | Open surgery         | Yes | Proximal gastrectomy | Yes               |
| Yes               | Open surgery         | Yes | Distal gastrectomy   | Yes               |
| Yes               | Laparoscopic surgery | Yes | Proximal gastrectomy | No                |
| Yes               | Open surgery         | Yes | Distal gastrectomy   | No                |
| Yes               | Open surgery         | Yes | Proximal gastrectomy | Yes               |
| No                | Laparoscopic surgery | Yes | Proximal gastrectomy | Yes               |

|     |                      |     |                      |     |
|-----|----------------------|-----|----------------------|-----|
| No  | Open surgery         | Yes | Total gastrectomy    | No  |
| No  | Laparoscopic surgery | Yes | Proximal gastrectomy | Yes |
| No  | Laparoscopic surgery | No  | Proximal gastrectomy | Yes |
| Yes | Laparoscopic surgery | No  | Total gastrectomy    | Yes |
| Yes | Laparoscopic surgery | No  | Total gastrectomy    | No  |
| No  | Open surgery         | Yes | Distal gastrectomy   | Yes |
| Yes | Open surgery         | Yes | Distal gastrectomy   | Yes |
| No  | Open surgery         | Yes | Distal gastrectomy   | Yes |
| Yes | Laparoscopic surgery | Yes | Total gastrectomy    | Yes |
| Yes | Open surgery         | No  | Total gastrectomy    | Yes |
| No  | Open surgery         | No  | Distal gastrectomy   | Yes |
| No  | Laparoscopic surgery | No  | Total gastrectomy    | No  |
| No  | Open surgery         | Yes | Proximal gastrectomy | No  |
| No  | Laparoscopic surgery | Yes | Distal gastrectomy   | Yes |
| No  | Open surgery         | Yes | Total gastrectomy    | Yes |
| No  | Laparoscopic surgery | Yes | Proximal gastrectomy | No  |
| Yes | Open surgery         | No  | Total gastrectomy    | No  |
| Yes | Laparoscopic surgery | No  | Total gastrectomy    | Yes |
| No  | Laparoscopic surgery | Yes | Proximal gastrectomy | Yes |
| Yes | Laparoscopic surgery | Yes | Distal gastrectomy   | Yes |
| Yes | Laparoscopic surgery | Yes | Total gastrectomy    | Yes |
| Yes | Laparoscopic surgery | Yes | Total gastrectomy    | Yes |
| No  | Laparoscopic surgery | No  | Total gastrectomy    | Yes |
| No  | Open surgery         | Yes | Distal gastrectomy   | Yes |
| Yes | Open surgery         | No  | Total gastrectomy    | No  |
| Yes | Laparoscopic surgery | Yes | Total gastrectomy    | Yes |
| Yes | Laparoscopic surgery | Yes | Proximal gastrectomy | Yes |
| No  | Open surgery         | Yes | Distal gastrectomy   | No  |
| No  | Open surgery         | Yes | Proximal gastrectomy | No  |
| Yes | Open surgery         | Yes | Distal gastrectomy   | Yes |
| No  | Open surgery         | Yes | Distal gastrectomy   | Yes |
| Yes | Open surgery         | No  | Total gastrectomy    | Yes |
| Yes | Open surgery         | No  | Total gastrectomy    | No  |
| Yes | Laparoscopic surgery | No  | Total gastrectomy    | No  |
| No  | Open surgery         | Yes | Total gastrectomy    | No  |
| No  | Laparoscopic surgery | Yes | Total gastrectomy    | No  |
| Yes | Open surgery         | Yes | Proximal gastrectomy | No  |
| No  | Open surgery         | Yes | Total gastrectomy    | No  |
| Yes | Open surgery         | Yes | Distal gastrectomy   | No  |
| Yes | Open surgery         | No  | Total gastrectomy    | No  |
| Yes | Open surgery         | Yes | Proximal gastrectomy | No  |
| No  | Open surgery         | No  | Distal gastrectomy   | No  |
| No  | Laparoscopic surgery | No  | Distal gastrectomy   | Yes |
| No  | Laparoscopic surgery | Yes | Total gastrectomy    | No  |
| Yes | Laparoscopic surgery | No  | Proximal gastrectomy | Yes |
| No  | Laparoscopic surgery | Yes | Distal gastrectomy   | Yes |
| No  | Open surgery         | Yes | Total gastrectomy    | Yes |
| Yes | Laparoscopic surgery | Yes | Proximal gastrectomy | Yes |
| Yes | Open surgery         | Yes | Total gastrectomy    | No  |
| Yes | Laparoscopic surgery | Yes | Proximal gastrectomy | Yes |
| Yes | Open surgery         | No  | Distal gastrectomy   | Yes |
| No  | Open surgery         | No  | Distal gastrectomy   | No  |
| No  | Laparoscopic surgery | No  | Proximal gastrectomy | Yes |
| No  | Laparoscopic surgery | No  | Proximal gastrectomy | No  |

|     |                      |     |                      |     |
|-----|----------------------|-----|----------------------|-----|
| Yes | Open surgery         | No  | Total gastrectomy    | No  |
| Yes | Open surgery         | Yes | Proximal gastrectomy | No  |
| Yes | Open surgery         | Yes | Total gastrectomy    | Yes |
| No  | Open surgery         | Yes | Total gastrectomy    | No  |
| No  | Open surgery         | Yes | Proximal gastrectomy | Yes |
| Yes | Open surgery         | Yes | Proximal gastrectomy | Yes |
| Yes | Open surgery         | Yes | Total gastrectomy    | No  |
| No  | Open surgery         | No  | Distal gastrectomy   | Yes |
| No  | Laparoscopic surgery | Yes | Total gastrectomy    | No  |
| Yes | Laparoscopic surgery | Yes | Distal gastrectomy   | Yes |
| Yes | Open surgery         | No  | Distal gastrectomy   | No  |
| Yes | Open surgery         | Yes | Total gastrectomy    | No  |
| No  | Open surgery         | Yes | Distal gastrectomy   | Yes |
| Yes | Open surgery         | Yes | Distal gastrectomy   | No  |
| Yes | Laparoscopic surgery | Yes | Proximal gastrectomy | No  |
| Yes | Open surgery         | Yes | Proximal gastrectomy | Yes |
| No  | Laparoscopic surgery | No  | Proximal gastrectomy | No  |
| Yes | Laparoscopic surgery | No  | Total gastrectomy    | No  |
| Yes | Laparoscopic surgery | No  | Distal gastrectomy   | No  |
| Yes | Open surgery         | No  | Distal gastrectomy   | Yes |
| Yes | Laparoscopic surgery | No  | Proximal gastrectomy | No  |
| Yes | Open surgery         | Yes | Proximal gastrectomy | No  |
| Yes | Open surgery         | Yes | Proximal gastrectomy | No  |
| Yes | Laparoscopic surgery | No  | Total gastrectomy    | No  |
| No  | Open surgery         | No  | Distal gastrectomy   | No  |
| No  | Laparoscopic surgery | Yes | Proximal gastrectomy | No  |
| No  | Open surgery         | Yes | Distal gastrectomy   | No  |
| Yes | Open surgery         | No  | Proximal gastrectomy | No  |
| Yes | Open surgery         | Yes | Distal gastrectomy   | No  |
| Yes | Open surgery         | No  | Distal gastrectomy   | No  |
| Yes | Open surgery         | No  | Proximal gastrectomy | No  |
| Yes | Open surgery         | No  | Distal gastrectomy   | Yes |
| No  | Open surgery         | No  | Proximal gastrectomy | No  |
| No  | Laparoscopic surgery | No  | Proximal gastrectomy | No  |
| No  | Laparoscopic surgery | No  | Total gastrectomy    | No  |
| No  | Laparoscopic surgery | No  | Proximal gastrectomy | Yes |
| No  | Laparoscopic surgery | No  | Proximal gastrectomy | Yes |
| No  | Open surgery         | No  | Total gastrectomy    | No  |
| No  | Laparoscopic surgery | Yes | Proximal gastrectomy | Yes |
| No  | Open surgery         | No  | Proximal gastrectomy | Yes |
| No  | Laparoscopic surgery | Yes | Distal gastrectomy   | Yes |
| Yes | Laparoscopic surgery | Yes | Total gastrectomy    | No  |
| No  | Laparoscopic surgery | Yes | Total gastrectomy    | No  |
| Yes | Laparoscopic surgery | No  | Distal gastrectomy   | No  |
| No  | Open surgery         | No  | Distal gastrectomy   | No  |
| No  | Laparoscopic surgery | No  | Proximal gastrectomy | No  |
| Yes | Open surgery         | Yes | Distal gastrectomy   | No  |
| Yes | Laparoscopic surgery | No  | Proximal gastrectomy | Yes |
| No  | Laparoscopic surgery | Yes | Proximal gastrectomy | No  |
| Yes | Open surgery         | No  | Distal gastrectomy   | Yes |
| Yes | Open surgery         | No  | Distal gastrectomy   | No  |
| Yes | Open surgery         | No  | Distal gastrectomy   | Yes |
| Yes | Open surgery         | No  | Total gastrectomy    | No  |
| Yes | Laparoscopic surgery | No  | Proximal gastrectomy | Yes |



|     |                      |     |                      |     |
|-----|----------------------|-----|----------------------|-----|
| Yes | Open surgery         | No  | Distal gastrectomy   | No  |
| Yes | Open surgery         | No  | Total gastrectomy    | Yes |
| Yes | Open surgery         | No  | Proximal gastrectomy | No  |
| Yes | Open surgery         | No  | Total gastrectomy    | No  |
| Yes | Open surgery         | Yes | Distal gastrectomy   | No  |
| Yes | Open surgery         | Yes | Total gastrectomy    | No  |
| No  | Laparoscopic surgery | No  | Proximal gastrectomy | No  |
| No  | Open surgery         | No  | Distal gastrectomy   | No  |
| No  | Open surgery         | No  | Proximal gastrectomy | No  |
| No  | Laparoscopic surgery | No  | Proximal gastrectomy | No  |
| No  | Open surgery         | Yes | Distal gastrectomy   | Yes |
| No  | Open surgery         | Yes | Proximal gastrectomy | No  |
| No  | Laparoscopic surgery | No  | Proximal gastrectomy | Yes |
| No  | Open surgery         | Yes | Total gastrectomy    | No  |
| No  | Open surgery         | Yes | Proximal gastrectomy | Yes |
| Yes | Laparoscopic surgery | No  | Distal gastrectomy   | No  |
| Yes | Laparoscopic surgery | No  | Distal gastrectomy   | No  |
| Yes | Open surgery         | Yes | Proximal gastrectomy | Yes |
| Yes | Laparoscopic surgery | No  | Total gastrectomy    | No  |
| Yes | Laparoscopic surgery | No  | Proximal gastrectomy | No  |
| No  | Open surgery         | No  | Distal gastrectomy   | No  |
| No  | Open surgery         | No  | Distal gastrectomy   | No  |
| No  | Open surgery         | No  | Distal gastrectomy   | No  |
| No  | Laparoscopic surgery | No  | Distal gastrectomy   | No  |
| No  | Open surgery         | No  | Distal gastrectomy   | No  |
| No  | Open surgery         | No  | Proximal gastrectomy | No  |
| No  | Laparoscopic surgery | No  | Proximal gastrectomy | No  |
| No  | Laparoscopic surgery | No  | Distal gastrectomy   | No  |
| Yes | Laparoscopic surgery | No  | Total gastrectomy    | Yes |
| Yes | Open surgery         | No  | Proximal gastrectomy | Yes |
| Yes | Laparoscopic surgery | Yes | Total gastrectomy    | Yes |
| Yes | Open surgery         | No  | Proximal gastrectomy | No  |
| Yes | Laparoscopic surgery | No  | Distal gastrectomy   | No  |
| No  | Open surgery         | No  | Distal gastrectomy   | No  |
| Yes | Laparoscopic surgery | No  | Total gastrectomy    | No  |
| No  | Open surgery         | No  | Total gastrectomy    | No  |
| Yes | Open surgery         | No  | Proximal gastrectomy | No  |
| No  | Laparoscopic surgery | No  | Total gastrectomy    | No  |
| Yes | Open surgery         | No  | Proximal gastrectomy | No  |
| Yes | Open surgery         | No  | Proximal gastrectomy | No  |
| No  | Open surgery         | No  | Proximal gastrectomy | No  |
| No  | Laparoscopic surgery | No  | Proximal gastrectomy | No  |
| Yes | Laparoscopic surgery | Yes | Distal gastrectomy   | No  |
| No  | Open surgery         | No  | Distal gastrectomy   | No  |
| Yes | Open surgery         | No  | Distal gastrectomy   | Yes |
| No  | Laparoscopic surgery | No  | Total gastrectomy    | No  |
| No  | Laparoscopic surgery | No  | Total gastrectomy    | No  |
| No  | Laparoscopic surgery | No  | Proximal gastrectomy | No  |
| No  | Open surgery         | Yes | Distal gastrectomy   | Yes |
| No  | Laparoscopic surgery | No  | Proximal gastrectomy | Yes |
| No  | Open surgery         | No  | Distal gastrectomy   | No  |
| Yes | Open surgery         | No  | Distal gastrectomy   | Yes |
| Yes | Open surgery         | No  | Total gastrectomy    | Yes |
| Yes | Open surgery         | No  | Proximal gastrectomy | No  |

|     |                      |     |                      |     |
|-----|----------------------|-----|----------------------|-----|
| No  | Laparoscopic surgery | No  | Proximal gastrectomy | No  |
| No  | Open surgery         | No  | Proximal gastrectomy | No  |
| No  | Open surgery         | Yes | Distal gastrectomy   | No  |
| Yes | Open surgery         | Yes | Proximal gastrectomy | No  |
| No  | Laparoscopic surgery | No  | Total gastrectomy    | No  |
| No  | Laparoscopic surgery | No  | Distal gastrectomy   | No  |
| No  | Laparoscopic surgery | No  | Distal gastrectomy   | No  |
| No  | Laparoscopic surgery | No  | Distal gastrectomy   | No  |
| No  | Open surgery         | No  | Distal gastrectomy   | No  |
| No  | Laparoscopic surgery | No  | Distal gastrectomy   | Yes |
| No  | Open surgery         | No  | Total gastrectomy    | Yes |
| No  | Open surgery         | No  | Proximal gastrectomy | Yes |
| No  | Laparoscopic surgery | No  | Proximal gastrectomy | No  |
| No  | Open surgery         | No  | Proximal gastrectomy | No  |
| No  | Laparoscopic surgery | No  | Total gastrectomy    | No  |
| No  | Open surgery         | No  | Distal gastrectomy   | No  |
| No  | Laparoscopic surgery | No  | Proximal gastrectomy | No  |
| No  | Laparoscopic surgery | Yes | Distal gastrectomy   | No  |
| No  | Laparoscopic surgery | Yes | Total gastrectomy    | No  |
| No  | Laparoscopic surgery | No  | Proximal gastrectomy | No  |
| No  | Laparoscopic surgery | Yes | Distal gastrectomy   | No  |
| No  | Open surgery         | No  | Distal gastrectomy   | No  |
| Yes | Open surgery         | No  | Proximal gastrectomy | Yes |
| Yes | Laparoscopic surgery | No  | Proximal gastrectomy | Yes |
| Yes | Laparoscopic surgery | No  | Total gastrectomy    | No  |
| Yes | Open surgery         | No  | Total gastrectomy    | Yes |
| Yes | Open surgery         | No  | Distal gastrectomy   | Yes |
| Yes | Laparoscopic surgery | Yes | Distal gastrectomy   | No  |
| Yes | Open surgery         | No  | Total gastrectomy    | Yes |
| Yes | Laparoscopic surgery | Yes | Distal gastrectomy   | No  |
| Yes | Laparoscopic surgery | Yes | Distal gastrectomy   | No  |
| No  | Laparoscopic surgery | Yes | Total gastrectomy    | No  |
| Yes | Laparoscopic surgery | Yes | Distal gastrectomy   | No  |
| Yes | Laparoscopic surgery | No  | Total gastrectomy    | No  |
| No  | Laparoscopic surgery | No  | Proximal gastrectomy | No  |
| No  | Laparoscopic surgery | No  | Distal gastrectomy   | No  |
| Yes | Open surgery         | No  | Proximal gastrectomy | No  |
| No  | Open surgery         | No  | Proximal gastrectomy | No  |
| Yes | Open surgery         | No  | Distal gastrectomy   | No  |
| No  | Laparoscopic surgery | No  | Total gastrectomy    | No  |
| No  | Laparoscopic surgery | No  | Distal gastrectomy   | No  |
| Yes | Open surgery         | No  | Total gastrectomy    | No  |
| Yes | Open surgery         | No  | Distal gastrectomy   | Yes |
| No  | Laparoscopic surgery | No  | Distal gastrectomy   | Yes |
| Yes | Laparoscopic surgery | No  | Distal gastrectomy   | No  |
| Yes | Laparoscopic surgery | No  | Proximal gastrectomy | Yes |
| No  | Open surgery         | No  | Distal gastrectomy   | No  |
| Yes | Laparoscopic surgery | Yes | Proximal gastrectomy | No  |
| No  | Laparoscopic surgery | No  | Total gastrectomy    | No  |
| No  | Laparoscopic surgery | Yes | Total gastrectomy    | No  |
| No  | Open surgery         | No  | Distal gastrectomy   | No  |
| Yes | Laparoscopic surgery | Yes | Distal gastrectomy   | No  |
| No  | Laparoscopic surgery | Yes | Total gastrectomy    | No  |
| No  | Open surgery         | Yes | Total gastrectomy    | No  |

|     |                      |     |                      |     |
|-----|----------------------|-----|----------------------|-----|
| No  | Laparoscopic surgery | No  | Total gastrectomy    | Yes |
| Yes | Laparoscopic surgery | Yes | Distal gastrectomy   | Yes |
| Yes | Open surgery         | No  | Proximal gastrectomy | No  |
| Yes | Open surgery         | No  | Total gastrectomy    | Yes |
| Yes | Laparoscopic surgery | No  | Proximal gastrectomy | Yes |
| Yes | Open surgery         | No  | Total gastrectomy    | No  |
| No  | Open surgery         | No  | Proximal gastrectomy | Yes |
| No  | Open surgery         | No  | Total gastrectomy    | No  |
| No  | Open surgery         | No  | Total gastrectomy    | No  |
| No  | Laparoscopic surgery | No  | Distal gastrectomy   | No  |
| No  | Laparoscopic surgery | No  | Distal gastrectomy   | No  |
| No  | Open surgery         | No  | Distal gastrectomy   | No  |
| No  | Laparoscopic surgery | No  | Total gastrectomy    | No  |
| No  | Laparoscopic surgery | No  | Proximal gastrectomy | No  |
| No  | Open surgery         | No  | Total gastrectomy    | No  |
| Yes | Laparoscopic surgery | No  | Total gastrectomy    | No  |
| Yes | Open surgery         | No  | Distal gastrectomy   | No  |
| Yes | Open surgery         | No  | Proximal gastrectomy | No  |
| Yes | Open surgery         | No  | Proximal gastrectomy | No  |
| Yes | Open surgery         | No  | Distal gastrectomy   | No  |
| No  | Open surgery         | Yes | Distal gastrectomy   | Yes |
| Yes | Open surgery         | Yes | Total gastrectomy    | Yes |
| No  | Laparoscopic surgery | Yes | Proximal gastrectomy | Yes |
| Yes | Open surgery         | Yes | Proximal gastrectomy | No  |
| No  | Laparoscopic surgery | No  | Distal gastrectomy   | No  |
| Yes | Laparoscopic surgery | No  | Distal gastrectomy   | No  |
| Yes | Laparoscopic surgery | No  | Distal gastrectomy   | No  |
| No  | Laparoscopic surgery | No  | Total gastrectomy    | Yes |
| No  | Open surgery         | No  | Proximal gastrectomy | No  |
| Yes | Laparoscopic surgery | No  | Total gastrectomy    | No  |
| Yes | Open surgery         | No  | Proximal gastrectomy | Yes |
| Yes | Open surgery         | No  | Total gastrectomy    | No  |
| Yes | Laparoscopic surgery | Yes | Proximal gastrectomy | No  |
| Yes | Laparoscopic surgery | Yes | Proximal gastrectomy | Yes |
| Yes | Open surgery         | No  | Total gastrectomy    | No  |
| Yes | Open surgery         | No  | Distal gastrectomy   | Yes |
| No  | Laparoscopic surgery | No  | Distal gastrectomy   | No  |
| No  | Open surgery         | No  | Proximal gastrectomy | No  |
| No  | Laparoscopic surgery | No  | Proximal gastrectomy | No  |
| No  | Laparoscopic surgery | No  | Distal gastrectomy   | Yes |
| No  | Laparoscopic surgery | No  | Total gastrectomy    | Yes |
| No  | Open surgery         | No  | Total gastrectomy    | No  |
| No  | Laparoscopic surgery | No  | Distal gastrectomy   | No  |
| No  | Laparoscopic surgery | No  | Total gastrectomy    | No  |
| No  | Laparoscopic surgery | No  | Proximal gastrectomy | No  |
| No  | Laparoscopic surgery | No  | Total gastrectomy    | No  |
| No  | Laparoscopic surgery | No  | Distal gastrectomy   | No  |
| No  | Open surgery         | No  | Total gastrectomy    | No  |
| No  | Open surgery         | No  | Proximal gastrectomy | No  |
| No  | Open surgery         | No  | Distal gastrectomy   | No  |
| No  | Laparoscopic surgery | No  | Total gastrectomy    | No  |
| Yes | Open surgery         | Yes | Distal gastrectomy   | No  |
| Yes | Laparoscopic surgery | Yes | Proximal gastrectomy | No  |
| No  | Open surgery         | No  | Proximal gastrectomy | No  |

|     |                      |     |                      |     |
|-----|----------------------|-----|----------------------|-----|
| Yes | Open surgery         | No  | Distal gastrectomy   | No  |
| Yes | Open surgery         | No  | Distal gastrectomy   | No  |
| No  | Laparoscopic surgery | No  | Total gastrectomy    | Yes |
| Yes | Open surgery         | No  | Proximal gastrectomy | Yes |
| No  | Open surgery         | No  | Total gastrectomy    | No  |
| No  | Laparoscopic surgery | No  | Proximal gastrectomy | No  |
| No  | Open surgery         | No  | Total gastrectomy    | No  |
| Yes | Laparoscopic surgery | No  | Proximal gastrectomy | Yes |
| Yes | Laparoscopic surgery | Yes | Proximal gastrectomy | Yes |
| No  | Laparoscopic surgery | Yes | Total gastrectomy    | No  |
| Yes | Laparoscopic surgery | No  | Total gastrectomy    | No  |
| No  | Open surgery         | No  | Total gastrectomy    | No  |
| No  | Open surgery         | No  | Total gastrectomy    | Yes |
| Yes | Laparoscopic surgery | No  | Proximal gastrectomy | Yes |
| Yes | Laparoscopic surgery | No  | Total gastrectomy    | Yes |
| Yes | Open surgery         | No  | Distal gastrectomy   | Yes |
| Yes | Laparoscopic surgery | No  | Proximal gastrectomy | Yes |
| No  | Laparoscopic surgery | No  | Total gastrectomy    | No  |
| No  | Laparoscopic surgery | No  | Distal gastrectomy   | No  |
| No  | Laparoscopic surgery | No  | Proximal gastrectomy | No  |
| No  | Laparoscopic surgery | No  | Distal gastrectomy   | No  |
| No  | Open surgery         | No  | Distal gastrectomy   | No  |
| No  | Laparoscopic surgery | Yes | Distal gastrectomy   | No  |
| No  | Laparoscopic surgery | Yes | Distal gastrectomy   | No  |
| No  | Laparoscopic surgery | No  | Proximal gastrectomy | No  |
| No  | Laparoscopic surgery | Yes | Distal gastrectomy   | No  |
| No  | Laparoscopic surgery | Yes | Proximal gastrectomy | No  |
| No  | Open surgery         | No  | Total gastrectomy    | No  |
| No  | Open surgery         | No  | Distal gastrectomy   | No  |
| No  | Laparoscopic surgery | No  | Distal gastrectomy   | Yes |
| No  | Open surgery         | No  | Total gastrectomy    | No  |
| No  | Laparoscopic surgery | No  | Distal gastrectomy   | No  |
| No  | Laparoscopic surgery | No  | Total gastrectomy    | Yes |
| No  | Laparoscopic surgery | No  | Distal gastrectomy   | No  |
| No  | Open surgery         | No  | Distal gastrectomy   | Yes |
| No  | Laparoscopic surgery | No  | Proximal gastrectomy | Yes |
| No  | Laparoscopic surgery | No  | Total gastrectomy    | Yes |
| No  | Laparoscopic surgery | No  | Total gastrectomy    | No  |
| No  | Open surgery         | No  | Proximal gastrectomy | No  |
| No  | Laparoscopic surgery | No  | Proximal gastrectomy | No  |
| No  | Laparoscopic surgery | No  | Total gastrectomy    | No  |
| No  | Open surgery         | No  | Proximal gastrectomy | No  |
| No  | Laparoscopic surgery | No  | Proximal gastrectomy | No  |
| No  | Laparoscopic surgery | No  | Total gastrectomy    | No  |
| No  | Open surgery         | No  | Proximal gastrectomy | No  |
| No  | Open surgery         | No  | Total gastrectomy    | No  |
| No  | Laparoscopic surgery | No  | Proximal gastrectomy | No  |
| No  | Laparoscopic surgery | Yes | Proximal gastrectomy | No  |
| No  | Laparoscopic surgery | No  | Proximal gastrectomy | No  |
| Yes | Open surgery         | No  | Distal gastrectomy   | Yes |
| Yes | Open surgery         | Yes | Proximal gastrectomy | No  |
| No  | Open surgery         | Yes | Distal gastrectomy   | No  |
| Yes | Laparoscopic surgery | No  | Proximal gastrectomy | No  |
| Yes | Open surgery         | Yes | Proximal gastrectomy | Yes |

|     |                      |     |                      |     |
|-----|----------------------|-----|----------------------|-----|
| No  | Laparoscopic surgery | Yes | Total gastrectomy    | No  |
| No  | Open surgery         | No  | Total gastrectomy    | No  |
| No  | Laparoscopic surgery | Yes | Distal gastrectomy   | Yes |
| No  | Open surgery         | Yes | Distal gastrectomy   | No  |
| No  | Laparoscopic surgery | Yes | Distal gastrectomy   | No  |
| No  | Open surgery         | Yes | Total gastrectomy    | Yes |
| No  | Open surgery         | No  | Total gastrectomy    | Yes |
| No  | Open surgery         | No  | Total gastrectomy    | Yes |
| No  | Open surgery         | No  | Distal gastrectomy   | Yes |
| No  | Laparoscopic surgery | No  | Total gastrectomy    | No  |
| No  | Laparoscopic surgery | No  | Total gastrectomy    | No  |
| Yes | Open surgery         | No  | Proximal gastrectomy | No  |
| Yes | Laparoscopic surgery | No  | Proximal gastrectomy | No  |
| No  | Laparoscopic surgery | No  | Distal gastrectomy   | No  |
| No  | Laparoscopic surgery | No  | Distal gastrectomy   | No  |
| No  | Laparoscopic surgery | No  | Total gastrectomy    | No  |
| No  | Laparoscopic surgery | No  | Distal gastrectomy   | No  |
| No  | Open surgery         | No  | Distal gastrectomy   | No  |
| No  | Laparoscopic surgery | No  | Total gastrectomy    | No  |
| Yes | Open surgery         | No  | Proximal gastrectomy | No  |
| Yes | Open surgery         | Yes | Total gastrectomy    | Yes |
| No  | Laparoscopic surgery | Yes | Proximal gastrectomy | No  |
| Yes | Open surgery         | Yes | Proximal gastrectomy | Yes |
| Yes | Open surgery         | No  | Total gastrectomy    | Yes |
| No  | Open surgery         | No  | Proximal gastrectomy | Yes |
| Yes | Laparoscopic surgery | No  | Proximal gastrectomy | No  |
| No  | Open surgery         | No  | Proximal gastrectomy | Yes |
| No  | Laparoscopic surgery | No  | Distal gastrectomy   | No  |
| No  | Laparoscopic surgery | No  | Distal gastrectomy   | No  |
| Yes | Laparoscopic surgery | No  | Proximal gastrectomy | Yes |
| Yes | Laparoscopic surgery | Yes | Total gastrectomy    | Yes |
| No  | Open surgery         | No  | Total gastrectomy    | No  |
| Yes | Open surgery         | No  | Total gastrectomy    | No  |
| No  | Laparoscopic surgery | No  | Total gastrectomy    | No  |
| No  | Laparoscopic surgery | No  | Distal gastrectomy   | No  |
| Yes | Laparoscopic surgery | No  | Distal gastrectomy   | No  |
| Yes | Open surgery         | No  | Distal gastrectomy   | No  |
| No  | Laparoscopic surgery | No  | Proximal gastrectomy | No  |
| No  | Laparoscopic surgery | No  | Total gastrectomy    | No  |
| No  | Open surgery         | No  | Distal gastrectomy   | No  |
| No  | Open surgery         | No  | Total gastrectomy    | No  |
| No  | Laparoscopic surgery | No  | Distal gastrectomy   | No  |
| No  | Open surgery         | No  | Distal gastrectomy   | No  |
| No  | Open surgery         | No  | Proximal gastrectomy | No  |
| No  | Open surgery         | Yes | Proximal gastrectomy | No  |
| No  | Open surgery         | No  | Total gastrectomy    | No  |
| Yes | Open surgery         | No  | Total gastrectomy    | Yes |
| Yes | Laparoscopic surgery | No  | Proximal gastrectomy | Yes |
| No  | Open surgery         | No  | Distal gastrectomy   | Yes |
| Yes | Laparoscopic surgery | Yes | Distal gastrectomy   | Yes |
| Yes | Laparoscopic surgery | No  | Proximal gastrectomy | Yes |
| No  | Open surgery         | No  | Proximal gastrectomy | No  |
| Yes | Laparoscopic surgery | No  | Distal gastrectomy   | No  |
| No  | Laparoscopic surgery | No  | Distal gastrectomy   | No  |

|     |                      |     |                      |     |
|-----|----------------------|-----|----------------------|-----|
| No  | Open surgery         | No  | Distal gastrectomy   | No  |
| No  | Open surgery         | No  | Total gastrectomy    | No  |
| Yes | Open surgery         | No  | Proximal gastrectomy | No  |
| Yes | Open surgery         | No  | Total gastrectomy    | No  |
| No  | Laparoscopic surgery | No  | Total gastrectomy    | No  |
| No  | Open surgery         | Yes | Proximal gastrectomy | No  |
| No  | Open surgery         | No  | Proximal gastrectomy | No  |
| No  | Laparoscopic surgery | Yes | Total gastrectomy    | Yes |
| No  | Laparoscopic surgery | No  | Distal gastrectomy   | No  |
| No  | Laparoscopic surgery | No  | Distal gastrectomy   | Yes |
| No  | Laparoscopic surgery | No  | Total gastrectomy    | Yes |
| No  | Open surgery         | No  | Total gastrectomy    | Yes |
| No  | Open surgery         | No  | Total gastrectomy    | No  |
| No  | Laparoscopic surgery | No  | Proximal gastrectomy | No  |
| No  | Laparoscopic surgery | No  | Total gastrectomy    | No  |
| No  | Laparoscopic surgery | No  | Proximal gastrectomy | No  |
| No  | Open surgery         | No  | Proximal gastrectomy | No  |
| No  | Open surgery         | No  | Total gastrectomy    | No  |
| No  | Open surgery         | No  | Proximal gastrectomy | No  |
| No  | Open surgery         | No  | Total gastrectomy    | No  |
| No  | Laparoscopic surgery | No  | Total gastrectomy    | No  |
| Yes | Laparoscopic surgery | No  | Total gastrectomy    | No  |
| Yes | Laparoscopic surgery | No  | Total gastrectomy    | No  |
| No  | Open surgery         | No  | Distal gastrectomy   | No  |
| Yes | Laparoscopic surgery | No  | Distal gastrectomy   | No  |
| Yes | Laparoscopic surgery | No  | Distal gastrectomy   | No  |
| No  | Laparoscopic surgery | No  | Proximal gastrectomy | No  |
| Yes | Laparoscopic surgery | No  | Proximal gastrectomy | No  |
| No  | Laparoscopic surgery | Yes | Total gastrectomy    | Yes |
| No  | Open surgery         | Yes | Distal gastrectomy   | Yes |
| No  | Open surgery         | No  | Proximal gastrectomy | Yes |
| Yes | Open surgery         | Yes | Total gastrectomy    | No  |
| Yes | Open surgery         | No  | Total gastrectomy    | Yes |
| No  | Open surgery         | No  | Proximal gastrectomy | Yes |
| Yes | Laparoscopic surgery | No  | Total gastrectomy    | No  |
| No  | Laparoscopic surgery | No  | Distal gastrectomy   | No  |
| No  | Laparoscopic surgery | No  | Distal gastrectomy   | No  |
| Yes | Open surgery         | No  | Proximal gastrectomy | No  |
| Yes | Open surgery         | No  | Total gastrectomy    | No  |
| No  | Laparoscopic surgery | No  | Proximal gastrectomy | No  |
| No  | Open surgery         | No  | Proximal gastrectomy | No  |
| No  | Laparoscopic surgery | No  | Proximal gastrectomy | No  |
| No  | Open surgery         | No  | Distal gastrectomy   | No  |
| No  | Laparoscopic surgery | No  | Distal gastrectomy   | No  |
| No  | Laparoscopic surgery | No  | Distal gastrectomy   | No  |
| No  | Laparoscopic surgery | No  | Proximal gastrectomy | No  |
| No  | Open surgery         | No  | Proximal gastrectomy | No  |
| No  | Laparoscopic surgery | No  | Distal gastrectomy   | No  |
| No  | Laparoscopic surgery | Yes | Proximal gastrectomy | No  |
| No  | Open surgery         | No  | Proximal gastrectomy | Yes |
| No  | Laparoscopic surgery | Yes | Total gastrectomy    | Yes |
| Yes | Laparoscopic surgery | No  | Proximal gastrectomy | No  |
| Yes | Open surgery         | No  | Distal gastrectomy   | Yes |
| No  | Laparoscopic surgery | No  | Proximal gastrectomy | No  |

|     |                      |     |                      |     |
|-----|----------------------|-----|----------------------|-----|
| Yes | Open surgery         | No  | Total gastrectomy    | No  |
| Yes | Open surgery         | No  | Total gastrectomy    | No  |
| No  | Laparoscopic surgery | No  | Proximal gastrectomy | Yes |
| Yes | Open surgery         | No  | Total gastrectomy    | No  |
| No  | Open surgery         | No  | Proximal gastrectomy | No  |
| No  | Open surgery         | No  | Proximal gastrectomy | No  |
| No  | Laparoscopic surgery | Yes | Total gastrectomy    | No  |
| No  | Laparoscopic surgery | Yes | Proximal gastrectomy | No  |
| No  | Laparoscopic surgery | Yes | Distal gastrectomy   | No  |
| No  | Open surgery         | No  | Distal gastrectomy   | No  |
| No  | Laparoscopic surgery | No  | Proximal gastrectomy | No  |
| No  | Open surgery         | No  | Total gastrectomy    | No  |
| No  | Open surgery         | No  | Distal gastrectomy   | No  |
| Yes | Open surgery         | No  | Distal gastrectomy   | No  |
| Yes | Laparoscopic surgery | No  | Total gastrectomy    | No  |
| No  | Laparoscopic surgery | No  | Total gastrectomy    | No  |
| No  | Laparoscopic surgery | No  | Distal gastrectomy   | No  |
| No  | Open surgery         | No  | Proximal gastrectomy | No  |
| No  | Open surgery         | No  | Distal gastrectomy   | No  |
| No  | Open surgery         | No  | Distal gastrectomy   | Yes |
| No  | Open surgery         | Yes | Total gastrectomy    | No  |
| No  | Open surgery         | No  | Total gastrectomy    | Yes |
| Yes | Open surgery         | No  | Distal gastrectomy   | No  |
| Yes | Open surgery         | No  | Distal gastrectomy   | No  |
| No  | Laparoscopic surgery | No  | Total gastrectomy    | No  |
| Yes | Laparoscopic surgery | No  | Total gastrectomy    | No  |
| Yes | Open surgery         | No  | Distal gastrectomy   | No  |
| No  | Open surgery         | No  | Distal gastrectomy   | Yes |
| Yes | Laparoscopic surgery | No  | Distal gastrectomy   | Yes |
| No  | Open surgery         | No  | Total gastrectomy    | No  |
| No  | Open surgery         | No  | Proximal gastrectomy | No  |
| No  | Laparoscopic surgery | No  | Total gastrectomy    | No  |
| Yes | Open surgery         | Yes | Total gastrectomy    | No  |
| Yes | Laparoscopic surgery | Yes | Total gastrectomy    | No  |
| No  | Open surgery         | Yes | Total gastrectomy    | No  |
| Yes | Laparoscopic surgery | Yes | Distal gastrectomy   | Yes |
| No  | Open surgery         | No  | Total gastrectomy    | No  |
| No  | Open surgery         | Yes | Distal gastrectomy   | No  |
| Yes | Laparoscopic surgery | No  | Proximal gastrectomy | No  |
| Yes | Laparoscopic surgery | No  | Total gastrectomy    | No  |
| No  | Laparoscopic surgery | No  | Proximal gastrectomy | No  |
| No  | Laparoscopic surgery | No  | Total gastrectomy    | No  |
| No  | Open surgery         | No  | Distal gastrectomy   | No  |
| No  | Open surgery         | No  | Distal gastrectomy   | No  |
| No  | Open surgery         | No  | Total gastrectomy    | No  |
| No  | Open surgery         | No  | Total gastrectomy    | No  |
| No  | Laparoscopic surgery | Yes | Distal gastrectomy   | No  |
| No  | Open surgery         | No  | Distal gastrectomy   | No  |
| No  | Laparoscopic surgery | No  | Proximal gastrectomy | No  |
| No  | Laparoscopic surgery | No  | Total gastrectomy    | No  |
| Yes | Open surgery         | No  | Total gastrectomy    | Yes |
| Yes | Open surgery         | No  | Total gastrectomy    | Yes |
| No  | Open surgery         | No  | Proximal gastrectomy | No  |
| Yes | Open surgery         | No  | Distal gastrectomy   | Yes |

|     |                      |     |                      |     |
|-----|----------------------|-----|----------------------|-----|
| No  | Open surgery         | No  | Proximal gastrectomy | Yes |
| No  | Laparoscopic surgery | Yes | Total gastrectomy    | No  |
| No  | Laparoscopic surgery | No  | Distal gastrectomy   | No  |
| No  | Open surgery         | No  | Distal gastrectomy   | Yes |
| No  | Open surgery         | No  | Proximal gastrectomy | Yes |
| No  | Laparoscopic surgery | No  | Proximal gastrectomy | No  |
| No  | Laparoscopic surgery | No  | Proximal gastrectomy | Yes |
| Yes | Open surgery         | No  | Proximal gastrectomy | No  |
| No  | Open surgery         | No  | Proximal gastrectomy | Yes |
| Yes | Laparoscopic surgery | No  | Proximal gastrectomy | No  |
| No  | Laparoscopic surgery | No  | Proximal gastrectomy | No  |
| No  | Laparoscopic surgery | No  | Proximal gastrectomy | No  |
| Yes | Laparoscopic surgery | Yes | Proximal gastrectomy | No  |
| Yes | Open surgery         | No  | Proximal gastrectomy | No  |
| No  | Open surgery         | No  | Proximal gastrectomy | No  |
| No  | Open surgery         | No  | Distal gastrectomy   | No  |
| No  | Open surgery         | No  | Distal gastrectomy   | No  |
| No  | Laparoscopic surgery | No  | Proximal gastrectomy | No  |
| No  | Open surgery         | No  | Proximal gastrectomy | No  |
| No  | Open surgery         | Yes | Proximal gastrectomy | No  |
| Yes | Open surgery         | No  | Total gastrectomy    | No  |
| Yes | Open surgery         | No  | Total gastrectomy    | Yes |
| No  | Laparoscopic surgery | No  | Proximal gastrectomy | No  |
| Yes | Open surgery         | No  | Distal gastrectomy   | Yes |
| Yes | Laparoscopic surgery | No  | Distal gastrectomy   | No  |
| No  | Laparoscopic surgery | No  | Total gastrectomy    | No  |
| Yes | Open surgery         | No  | Proximal gastrectomy | Yes |
| No  | Open surgery         | No  | Distal gastrectomy   | No  |
| No  | Open surgery         | No  | Distal gastrectomy   | No  |
| No  | Laparoscopic surgery | No  | Proximal gastrectomy | Yes |
| No  | Laparoscopic surgery | No  | Proximal gastrectomy | No  |
| No  | Laparoscopic surgery | No  | Total gastrectomy    | No  |
| No  | Open surgery         | No  | Distal gastrectomy   | No  |
| No  | Laparoscopic surgery | No  | Distal gastrectomy   | No  |
| No  | Laparoscopic surgery | Yes | Proximal gastrectomy | No  |
| No  | Laparoscopic surgery | No  | Distal gastrectomy   | No  |
| Yes | Laparoscopic surgery | Yes | Distal gastrectomy   | No  |
| Yes | Laparoscopic surgery | No  | Proximal gastrectomy | No  |
| No  | Laparoscopic surgery | Yes | Distal gastrectomy   | No  |
| No  | Laparoscopic surgery | No  | Proximal gastrectomy | No  |
| No  | Laparoscopic surgery | No  | Proximal gastrectomy | No  |
| No  | Open surgery         | No  | Total gastrectomy    | No  |
| No  | Laparoscopic surgery | No  | Total gastrectomy    | Yes |
| No  | Laparoscopic surgery | No  | Distal gastrectomy   | Yes |
| No  | Open surgery         | No  | Proximal gastrectomy | No  |
| No  | Open surgery         | No  | Proximal gastrectomy | Yes |
| No  | Laparoscopic surgery | No  | Proximal gastrectomy | No  |
| No  | Laparoscopic surgery | No  | Distal gastrectomy   | Yes |
| No  | Open surgery         | No  | Proximal gastrectomy | No  |
| No  | Laparoscopic surgery | No  | Total gastrectomy    | No  |
| No  | Laparoscopic surgery | No  | Proximal gastrectomy | No  |
| No  | Laparoscopic surgery | No  | Distal gastrectomy   | Yes |
| No  | Laparoscopic surgery | No  | Distal gastrectomy   | No  |
| No  | Open surgery         | Yes | Proximal gastrectomy | Yes |



|     |                      |     |                      |     |
|-----|----------------------|-----|----------------------|-----|
| No  | Open surgery         | Yes | Total gastrectomy    | No  |
| No  | Open surgery         | Yes | Total gastrectomy    | No  |
| No  | Open surgery         | Yes | Proximal gastrectomy | No  |
| No  | Laparoscopic surgery | No  | Proximal gastrectomy | No  |
| No  | Open surgery         | No  | Distal gastrectomy   | No  |
| No  | Open surgery         | No  | Total gastrectomy    | No  |
| No  | Laparoscopic surgery | No  | Proximal gastrectomy | No  |
| No  | Open surgery         | No  | Total gastrectomy    | No  |
| No  | Open surgery         | No  | Total gastrectomy    | No  |
| No  | Laparoscopic surgery | No  | Total gastrectomy    | No  |
| No  | Laparoscopic surgery | No  | Distal gastrectomy   | No  |
| No  | Open surgery         | No  | Total gastrectomy    | No  |
| No  | Laparoscopic surgery | No  | Total gastrectomy    | No  |
| No  | Laparoscopic surgery | No  | Total gastrectomy    | No  |
| No  | Open surgery         | No  | Total gastrectomy    | No  |
| No  | Laparoscopic surgery | No  | Distal gastrectomy   | Yes |
| No  | Laparoscopic surgery | No  | Total gastrectomy    | Yes |
| No  | Laparoscopic surgery | No  | Distal gastrectomy   | No  |
| No  | Laparoscopic surgery | No  | Distal gastrectomy   | No  |
| No  | Laparoscopic surgery | No  | Distal gastrectomy   | Yes |
| No  | Laparoscopic surgery | No  | Distal gastrectomy   | No  |
| No  | Laparoscopic surgery | Yes | Total gastrectomy    | No  |
| No  | Laparoscopic surgery | No  | Distal gastrectomy   | No  |
| No  | Open surgery         | No  | Total gastrectomy    | No  |
| Yes | Laparoscopic surgery | No  | Total gastrectomy    | Yes |
| Yes | Open surgery         | Yes | Distal gastrectomy   | No  |
| No  | Laparoscopic surgery | Yes | Distal gastrectomy   | No  |
| No  | Open surgery         | No  | Distal gastrectomy   | Yes |
| No  | Open surgery         | No  | Proximal gastrectomy | Yes |
| No  | Laparoscopic surgery | No  | Distal gastrectomy   | No  |
| Yes | Open surgery         | No  | Proximal gastrectomy | Yes |
| No  | Open surgery         | No  | Proximal gastrectomy | Yes |
| No  | Open surgery         | No  | Proximal gastrectomy | No  |
| No  | Laparoscopic surgery | No  | Total gastrectomy    | No  |
| Yes | Laparoscopic surgery | No  | Distal gastrectomy   | No  |
| Yes | Laparoscopic surgery | No  | Proximal gastrectomy | No  |
| No  | Open surgery         | No  | Distal gastrectomy   | No  |
| Yes | Laparoscopic surgery | Yes | Distal gastrectomy   | No  |
| No  | Laparoscopic surgery | Yes | Distal gastrectomy   | No  |
| No  | Open surgery         | No  | Proximal gastrectomy | No  |
| Yes | Laparoscopic surgery | No  | Distal gastrectomy   | No  |
| Yes | Laparoscopic surgery | No  | Distal gastrectomy   | No  |
| No  | Open surgery         | No  | Total gastrectomy    | No  |
| No  | Laparoscopic surgery | No  | Distal gastrectomy   | No  |
| No  | Open surgery         | No  | Distal gastrectomy   | No  |
| No  | Laparoscopic surgery | No  | Total gastrectomy    | No  |
| No  | Laparoscopic surgery | No  | Proximal gastrectomy | No  |
| No  | Open surgery         | No  | Total gastrectomy    | Yes |
| No  | Open surgery         | No  | Proximal gastrectomy | No  |
| No  | Open surgery         | No  | Total gastrectomy    | Yes |
| No  | Open surgery         | No  | Distal gastrectomy   | No  |
| No  | Open surgery         | No  | Total gastrectomy    | Yes |
| No  | Open surgery         | No  | Proximal gastrectomy | Yes |
| No  | Laparoscopic surgery | Yes | Distal gastrectomy   | Yes |

|     |                      |     |                      |     |
|-----|----------------------|-----|----------------------|-----|
| No  | Laparoscopic surgery | No  | Total gastrectomy    | No  |
| No  | Open surgery         | No  | Distal gastrectomy   | Yes |
| No  | Laparoscopic surgery | Yes | Proximal gastrectomy | No  |
| No  | Open surgery         | Yes | Proximal gastrectomy | No  |
| No  | Open surgery         | No  | Proximal gastrectomy | No  |
| No  | Laparoscopic surgery | No  | Proximal gastrectomy | No  |
| Yes | Laparoscopic surgery | No  | Total gastrectomy    | No  |
| No  | Open surgery         | No  | Proximal gastrectomy | No  |
| No  | Open surgery         | Yes | Total gastrectomy    | No  |
| Yes | Laparoscopic surgery | No  | Distal gastrectomy   | No  |
| No  | Open surgery         | No  | Distal gastrectomy   | No  |
| No  | Laparoscopic surgery | No  | Total gastrectomy    | No  |
| No  | Open surgery         | No  | Distal gastrectomy   | No  |
| No  | Laparoscopic surgery | No  | Total gastrectomy    | No  |
| No  | Laparoscopic surgery | No  | Total gastrectomy    | No  |
| No  | Laparoscopic surgery | No  | Total gastrectomy    | No  |
| Yes | Laparoscopic surgery | No  | Proximal gastrectomy | No  |
| Yes | Open surgery         | No  | Total gastrectomy    | Yes |
| No  | Open surgery         | No  | Distal gastrectomy   | Yes |
| Yes | Open surgery         | No  | Proximal gastrectomy | Yes |
| No  | Laparoscopic surgery | No  | Total gastrectomy    | Yes |
| No  | Laparoscopic surgery | No  | Total gastrectomy    | No  |
| Yes | Open surgery         | No  | Proximal gastrectomy | No  |
| Yes | Laparoscopic surgery | No  | Proximal gastrectomy | No  |
| No  | Laparoscopic surgery | No  | Distal gastrectomy   | No  |
| No  | Laparoscopic surgery | No  | Distal gastrectomy   | No  |
| No  | Open surgery         | No  | Distal gastrectomy   | No  |
| No  | Open surgery         | No  | Total gastrectomy    | No  |
| No  | Laparoscopic surgery | No  | Proximal gastrectomy | No  |
| Yes | Open surgery         | No  | Distal gastrectomy   | No  |
| Yes | Open surgery         | No  | Distal gastrectomy   | No  |
| No  | Laparoscopic surgery | No  | Distal gastrectomy   | No  |
| Yes | Laparoscopic surgery | No  | Total gastrectomy    | No  |
| No  | Laparoscopic surgery | Yes | Distal gastrectomy   | No  |
| No  | Laparoscopic surgery | Yes | Proximal gastrectomy | No  |
| Yes | Open surgery         | No  | Proximal gastrectomy | No  |
| No  | Open surgery         | No  | Total gastrectomy    | No  |
| No  | Laparoscopic surgery | No  | Proximal gastrectomy | No  |
| No  | Laparoscopic surgery | No  | Total gastrectomy    | No  |
| Yes | Laparoscopic surgery | No  | Distal gastrectomy   | No  |
| No  | Open surgery         | No  | Total gastrectomy    | Yes |
| Yes | Open surgery         | No  | Distal gastrectomy   | No  |
| No  | Open surgery         | No  | Distal gastrectomy   | Yes |
| No  | Open surgery         | No  | Total gastrectomy    | No  |
| No  | Laparoscopic surgery | No  | Distal gastrectomy   | No  |
| No  | Open surgery         | No  | Proximal gastrectomy | No  |
| No  | Laparoscopic surgery | No  | Total gastrectomy    | No  |
| No  | Laparoscopic surgery | No  | Proximal gastrectomy | No  |
| No  | Open surgery         | No  | Total gastrectomy    | No  |
| No  | Laparoscopic surgery | No  | Distal gastrectomy   | No  |
| No  | Open surgery         | No  | Distal gastrectomy   | No  |
| No  | Laparoscopic surgery | No  | Proximal gastrectomy | No  |
| No  | Open surgery         | Yes | Distal gastrectomy   | No  |
| No  | Open surgery         | Yes | Distal gastrectomy   | No  |

|     |                      |     |                      |     |
|-----|----------------------|-----|----------------------|-----|
| No  | Open surgery         | No  | Total gastrectomy    | No  |
| No  | Open surgery         | No  | Distal gastrectomy   | No  |
| No  | Laparoscopic surgery | No  | Proximal gastrectomy | No  |
| No  | Open surgery         | Yes | Distal gastrectomy   | No  |
| No  | Open surgery         | No  | Total gastrectomy    | No  |
| No  | Laparoscopic surgery | Yes | Proximal gastrectomy | No  |
| Yes | Laparoscopic surgery | Yes | Distal gastrectomy   | No  |
| Yes | Open surgery         | No  | Distal gastrectomy   | No  |
| No  | Laparoscopic surgery | No  | Proximal gastrectomy | No  |
| Yes | Open surgery         | No  | Total gastrectomy    | No  |
| No  | Open surgery         | No  | Total gastrectomy    | No  |
| No  | Laparoscopic surgery | No  | Total gastrectomy    | No  |
| No  | Open surgery         | No  | Distal gastrectomy   | Yes |
| No  | Open surgery         | No  | Proximal gastrectomy | No  |
| No  | Open surgery         | Yes | Total gastrectomy    | Yes |
| Yes | Laparoscopic surgery | No  | Proximal gastrectomy | Yes |
| No  | Laparoscopic surgery | No  | Total gastrectomy    | No  |
| No  | Open surgery         | Yes | Distal gastrectomy   | Yes |
| Yes | Open surgery         | Yes | Total gastrectomy    | No  |
| No  | Laparoscopic surgery | Yes | Distal gastrectomy   | No  |
| No  | Laparoscopic surgery | Yes | Distal gastrectomy   | Yes |
| No  | Open surgery         | No  | Proximal gastrectomy | Yes |
| No  | Open surgery         | Yes | Total gastrectomy    | Yes |
| No  | Laparoscopic surgery | Yes | Proximal gastrectomy | No  |
| No  | Laparoscopic surgery | No  | Total gastrectomy    | Yes |
| No  | Laparoscopic surgery | No  | Distal gastrectomy   | Yes |
| No  | Open surgery         | No  | Proximal gastrectomy | Yes |
| Yes | Open surgery         | No  | Total gastrectomy    | Yes |
| No  | Open surgery         | No  | Distal gastrectomy   | Yes |
| No  | Laparoscopic surgery | No  | Distal gastrectomy   | Yes |
| No  | Laparoscopic surgery | No  | Total gastrectomy    | No  |
| No  | Open surgery         | No  | Distal gastrectomy   | Yes |
| No  | Open surgery         | No  | Distal gastrectomy   | Yes |
| Yes | Open surgery         | No  | Distal gastrectomy   | Yes |
| Yes | Laparoscopic surgery | No  | Distal gastrectomy   | Yes |
| No  | Open surgery         | No  | Distal gastrectomy   | No  |
| No  | Laparoscopic surgery | No  | Distal gastrectomy   | No  |
| No  | Open surgery         | No  | Distal gastrectomy   | Yes |
| No  | Open surgery         | Yes | Proximal gastrectomy | No  |
| Yes | Laparoscopic surgery | No  | Proximal gastrectomy | No  |
| No  | Laparoscopic surgery | No  | Distal gastrectomy   | Yes |
| No  | Open surgery         | No  | Total gastrectomy    | No  |
| No  | Open surgery         | Yes | Proximal gastrectomy | No  |
| No  | Laparoscopic surgery | Yes | Total gastrectomy    | No  |
| No  | Laparoscopic surgery | No  | Proximal gastrectomy | No  |
| No  | Open surgery         | Yes | Total gastrectomy    | Yes |
| No  | Open surgery         | Yes | Proximal gastrectomy | Yes |
| Yes | Laparoscopic surgery | No  | Distal gastrectomy   | Yes |
| No  | Open surgery         | Yes | Proximal gastrectomy | Yes |
| No  | Open surgery         | Yes | Proximal gastrectomy | No  |
| No  | Open surgery         | No  | Total gastrectomy    | No  |
| Yes | Laparoscopic surgery | No  | Distal gastrectomy   | No  |
| No  | Laparoscopic surgery | No  | Proximal gastrectomy | No  |
| No  | Open surgery         | No  | Proximal gastrectomy | No  |

|     |                      |     |                      |     |
|-----|----------------------|-----|----------------------|-----|
| No  | Open surgery         | No  | Distal gastrectomy   | No  |
| No  | Laparoscopic surgery | No  | Total gastrectomy    | No  |
| No  | Laparoscopic surgery | No  | Proximal gastrectomy | No  |
| No  | Laparoscopic surgery | No  | Proximal gastrectomy | No  |
| Yes | Open surgery         | No  | Distal gastrectomy   | No  |
| No  | Open surgery         | Yes | Distal gastrectomy   | No  |
| No  | Laparoscopic surgery | No  | Proximal gastrectomy | No  |
| No  | Laparoscopic surgery | Yes | Distal gastrectomy   | No  |
| No  | Laparoscopic surgery | No  | Distal gastrectomy   | No  |
| No  | Open surgery         | No  | Proximal gastrectomy | No  |
| No  | Laparoscopic surgery | Yes | Total gastrectomy    | Yes |
| No  | Laparoscopic surgery | Yes | Proximal gastrectomy | No  |
| No  | Open surgery         | No  | Proximal gastrectomy | No  |
| No  | Laparoscopic surgery | No  | Total gastrectomy    | No  |
| No  | Laparoscopic surgery | No  | Total gastrectomy    | No  |
| No  | Laparoscopic surgery | Yes | Proximal gastrectomy | No  |
| No  | Laparoscopic surgery | Yes | Total gastrectomy    | No  |
| No  | Open surgery         | Yes | Proximal gastrectomy | Yes |
| No  | Laparoscopic surgery | No  | Total gastrectomy    | Yes |
| Yes | Open surgery         | No  | Proximal gastrectomy | No  |
| No  | Laparoscopic surgery | No  | Total gastrectomy    | Yes |
| No  | Laparoscopic surgery | No  | Total gastrectomy    | No  |
| No  | Open surgery         | No  | Proximal gastrectomy | Yes |
| No  | Laparoscopic surgery | No  | Total gastrectomy    | Yes |
| No  | Laparoscopic surgery | No  | Total gastrectomy    | No  |
| No  | Open surgery         | No  | Total gastrectomy    | Yes |
| No  | Open surgery         | No  | Distal gastrectomy   | Yes |
| Yes | Open surgery         | No  | Total gastrectomy    | No  |
| No  | Open surgery         | No  | Proximal gastrectomy | No  |
| No  | Open surgery         | No  | Distal gastrectomy   | No  |
| No  | Laparoscopic surgery | No  | Distal gastrectomy   | No  |
| Yes | Open surgery         | Yes | Total gastrectomy    | No  |
| No  | Laparoscopic surgery | No  | Proximal gastrectomy | No  |
| No  | Open surgery         | No  | Total gastrectomy    | No  |
| No  | Open surgery         | No  | Total gastrectomy    | No  |
| No  | Laparoscopic surgery | Yes | Total gastrectomy    | No  |
| No  | Laparoscopic surgery | No  | Distal gastrectomy   | No  |
| No  | Open surgery         | Yes | Proximal gastrectomy | No  |
| Yes | Laparoscopic surgery | No  | Proximal gastrectomy | No  |
| No  | Open surgery         | No  | Distal gastrectomy   | No  |
| No  | Laparoscopic surgery | No  | Total gastrectomy    | No  |
| No  | Laparoscopic surgery | Yes | Proximal gastrectomy | Yes |
| No  | Laparoscopic surgery | Yes | Total gastrectomy    | Yes |
| No  | Laparoscopic surgery | No  | Total gastrectomy    | No  |
| No  | Open surgery         | No  | Proximal gastrectomy | No  |
| No  | Laparoscopic surgery | No  | Total gastrectomy    | No  |
| No  | Open surgery         | No  | Distal gastrectomy   | Yes |
| No  | Laparoscopic surgery | No  | Total gastrectomy    | Yes |
| No  | Laparoscopic surgery | No  | Total gastrectomy    | No  |
| No  | Open surgery         | No  | Distal gastrectomy   | No  |
| No  | Open surgery         | No  | Distal gastrectomy   | Yes |
| No  | Open surgery         | No  | Proximal gastrectomy | No  |
| No  | Laparoscopic surgery | No  | Distal gastrectomy   | Yes |
| Yes | Open surgery         | No  | Total gastrectomy    | No  |

|     |                      |     |                      |     |
|-----|----------------------|-----|----------------------|-----|
| Yes | Laparoscopic surgery | No  | Total gastrectomy    | No  |
| Yes | Laparoscopic surgery | Yes | Distal gastrectomy   | No  |
| No  | Open surgery         | Yes | Distal gastrectomy   | Yes |
| No  | Open surgery         | No  | Proximal gastrectomy | No  |
| No  | Laparoscopic surgery | Yes | Total gastrectomy    | No  |
| No  | Open surgery         | No  | Total gastrectomy    | No  |
| Yes | Open surgery         | Yes | Distal gastrectomy   | No  |
| No  | Laparoscopic surgery | No  | Proximal gastrectomy | Yes |
| No  | Laparoscopic surgery | No  | Proximal gastrectomy | No  |
| No  | Laparoscopic surgery | No  | Proximal gastrectomy | Yes |
| No  | Laparoscopic surgery | No  | Total gastrectomy    | No  |
| No  | Open surgery         | No  | Total gastrectomy    | Yes |
| No  | Open surgery         | No  | Total gastrectomy    | Yes |
| No  | Open surgery         | No  | Total gastrectomy    | No  |
| Yes | Open surgery         | No  | Distal gastrectomy   | Yes |
| No  | Laparoscopic surgery | No  | Distal gastrectomy   | No  |
| No  | Open surgery         | No  | Proximal gastrectomy | No  |
| No  | Laparoscopic surgery | No  | Distal gastrectomy   | Yes |
| Yes | Laparoscopic surgery | No  | Total gastrectomy    | Yes |
| No  | Open surgery         | No  | Distal gastrectomy   | Yes |
| No  | Laparoscopic surgery | No  | Distal gastrectomy   | No  |
| No  | Open surgery         | Yes | Total gastrectomy    | No  |
| No  | Laparoscopic surgery | No  | Proximal gastrectomy | Yes |
| No  | Open surgery         | Yes | Total gastrectomy    | Yes |
| No  | Laparoscopic surgery | Yes | Total gastrectomy    | Yes |
| Yes | Laparoscopic surgery | No  | Proximal gastrectomy | Yes |
| No  | Open surgery         | Yes | Proximal gastrectomy | Yes |
| No  | Open surgery         | No  | Distal gastrectomy   | Yes |
| No  | Open surgery         | No  | Proximal gastrectomy | No  |
| No  | Open surgery         | No  | Distal gastrectomy   | Yes |
| No  | Laparoscopic surgery | No  | Distal gastrectomy   | No  |
| No  | Laparoscopic surgery | No  | Proximal gastrectomy | Yes |
| No  | Laparoscopic surgery | No  | Proximal gastrectomy | No  |
| No  | Laparoscopic surgery | No  | Distal gastrectomy   | Yes |
| No  | Laparoscopic surgery | No  | Proximal gastrectomy | Yes |
| No  | Laparoscopic surgery | No  | Proximal gastrectomy | Yes |
| No  | Open surgery         | No  | Distal gastrectomy   | Yes |
| No  | Laparoscopic surgery | No  | Distal gastrectomy   | No  |
| No  | Laparoscopic surgery | No  | Proximal gastrectomy | Yes |
| No  | Open surgery         | No  | Total gastrectomy    | Yes |
| No  | Laparoscopic surgery | No  | Proximal gastrectomy | No  |
| No  | Open surgery         | No  | Proximal gastrectomy | Yes |
| No  | Open surgery         | No  | Proximal gastrectomy | Yes |
| No  | Open surgery         | Yes | Total gastrectomy    | Yes |
| No  | Open surgery         | Yes | Distal gastrectomy   | Yes |
| No  | Laparoscopic surgery | No  | Proximal gastrectomy | Yes |
| No  | Laparoscopic surgery | Yes | Proximal gastrectomy | Yes |
| No  | Laparoscopic surgery | Yes | Proximal gastrectomy | Yes |
| No  | Laparoscopic surgery | No  | Distal gastrectomy   | Yes |
| No  | Laparoscopic surgery | No  | Distal gastrectomy   | No  |
| Yes | Laparoscopic surgery | Yes | Distal gastrectomy   | No  |
| No  | Open surgery         | No  | Total gastrectomy    | No  |
| No  | Open surgery         | No  | Total gastrectomy    | No  |
| No  | Open surgery         | Yes | Distal gastrectomy   | Yes |
| No  | Open surgery         | Yes | Proximal gastrectomy | No  |

|     |                      |     |                      |     |
|-----|----------------------|-----|----------------------|-----|
| No  | Laparoscopic surgery | Yes | Proximal gastrectomy | Yes |
| Yes | Open surgery         | No  | Proximal gastrectomy | Yes |
| No  | Laparoscopic surgery | Yes | Total gastrectomy    | Yes |
| No  | Open surgery         | No  | Distal gastrectomy   | No  |
| No  | Open surgery         | Yes | Total gastrectomy    | Yes |
| No  | Open surgery         | No  | Distal gastrectomy   | Yes |
| No  | Open surgery         | Yes | Distal gastrectomy   | No  |
| No  | Open surgery         | No  | Distal gastrectomy   | No  |
| Yes | Laparoscopic surgery | No  | Proximal gastrectomy | Yes |
| No  | Laparoscopic surgery | Yes | Total gastrectomy    | Yes |
| No  | Laparoscopic surgery | No  | Distal gastrectomy   | No  |
| No  | Open surgery         | Yes | Proximal gastrectomy | Yes |
| Yes | Open surgery         | Yes | Proximal gastrectomy | Yes |
| No  | Open surgery         | Yes | Total gastrectomy    | No  |
| No  | Laparoscopic surgery | Yes | Proximal gastrectomy | No  |
| No  | Open surgery         | No  | Distal gastrectomy   | No  |
| No  | Laparoscopic surgery | Yes | Distal gastrectomy   | No  |
| No  | Laparoscopic surgery | No  | Proximal gastrectomy | No  |
| No  | Laparoscopic surgery | Yes | Total gastrectomy    | No  |
| No  | Open surgery         | Yes | Distal gastrectomy   | No  |
| No  | Laparoscopic surgery | Yes | Total gastrectomy    | No  |
| No  | Open surgery         | No  | Total gastrectomy    | No  |
| No  | Open surgery         | No  | Total gastrectomy    | No  |
| No  | Laparoscopic surgery | Yes | Proximal gastrectomy | Yes |
| No  | Open surgery         | No  | Distal gastrectomy   | Yes |
| No  | Laparoscopic surgery | No  | Distal gastrectomy   | Yes |
| No  | Open surgery         | Yes | Total gastrectomy    | Yes |
| No  | Open surgery         | Yes | Distal gastrectomy   | No  |
| No  | Open surgery         | Yes | Proximal gastrectomy | No  |
| No  | Laparoscopic surgery | Yes | Total gastrectomy    | No  |
| Yes | Laparoscopic surgery | No  | Distal gastrectomy   | No  |
| No  | Laparoscopic surgery | No  | Proximal gastrectomy | Yes |
| No  | Open surgery         | Yes | Proximal gastrectomy | No  |
| No  | Open surgery         | Yes | Total gastrectomy    | Yes |
| No  | Open surgery         | Yes | Proximal gastrectomy | Yes |
| No  | Open surgery         | Yes | Distal gastrectomy   | No  |
| No  | Open surgery         | No  | Total gastrectomy    | No  |
| No  | Open surgery         | Yes | Distal gastrectomy   | Yes |
| No  | Open surgery         | No  | Distal gastrectomy   | Yes |
| No  | Laparoscopic surgery | No  | Proximal gastrectomy | No  |
| No  | Laparoscopic surgery | Yes | Total gastrectomy    | Yes |
| No  | Open surgery         | Yes | Total gastrectomy    | No  |
| Yes | Laparoscopic surgery | Yes | Proximal gastrectomy | No  |
| Yes | Open surgery         | Yes | Proximal gastrectomy | No  |
| No  | Open surgery         | Yes | Proximal gastrectomy | Yes |
| No  | Laparoscopic surgery | No  | Proximal gastrectomy | No  |
| No  | Open surgery         | No  | Distal gastrectomy   | Yes |
| No  | Laparoscopic surgery | Yes | Distal gastrectomy   | No  |
| No  | Open surgery         | Yes | Proximal gastrectomy | No  |
| No  | Open surgery         | No  | Total gastrectomy    | No  |
| No  | Open surgery         | No  | Proximal gastrectomy | No  |
| No  | Laparoscopic surgery | No  | Proximal gastrectomy | No  |
| No  | Open surgery         | No  | Distal gastrectomy   | No  |
| No  | Laparoscopic surgery | No  | Proximal gastrectomy | No  |

|     |                      |     |                      |     |
|-----|----------------------|-----|----------------------|-----|
| No  | Open surgery         | No  | Distal gastrectomy   | No  |
| No  | Open surgery         | No  | Total gastrectomy    | No  |
| No  | Laparoscopic surgery | Yes | Proximal gastrectomy | No  |
| Yes | Laparoscopic surgery | Yes | Distal gastrectomy   | No  |
| No  | Laparoscopic surgery | No  | Proximal gastrectomy | Yes |
| No  | Laparoscopic surgery | Yes | Total gastrectomy    | Yes |
| No  | Laparoscopic surgery | Yes | Total gastrectomy    | No  |
| No  | Laparoscopic surgery | No  | Total gastrectomy    | Yes |
| No  | Open surgery         | No  | Total gastrectomy    | Yes |
| No  | Laparoscopic surgery | No  | Distal gastrectomy   | Yes |
| No  | Open surgery         | No  | Proximal gastrectomy | No  |
| No  | Open surgery         | Yes | Total gastrectomy    | No  |
| No  | Open surgery         | No  | Proximal gastrectomy | Yes |
| No  | Laparoscopic surgery | Yes | Total gastrectomy    | No  |
| No  | Laparoscopic surgery | Yes | Distal gastrectomy   | No  |
| No  | Open surgery         | No  | Proximal gastrectomy | No  |
| No  | Laparoscopic surgery | No  | Proximal gastrectomy | No  |
| No  | Laparoscopic surgery | No  | Total gastrectomy    | No  |
| No  | Laparoscopic surgery | Yes | Distal gastrectomy   | No  |
| Yes | Open surgery         | No  | Proximal gastrectomy | No  |
| No  | Open surgery         | Yes | Proximal gastrectomy | No  |
| Yes | Open surgery         | No  | Distal gastrectomy   | No  |
| No  | Laparoscopic surgery | No  | Proximal gastrectomy | No  |
| No  | Laparoscopic surgery | Yes | Total gastrectomy    | Yes |
| No  | Laparoscopic surgery | Yes | Total gastrectomy    | No  |
| No  | Open surgery         | No  | Total gastrectomy    | No  |
| No  | Laparoscopic surgery | No  | Distal gastrectomy   | Yes |
| No  | Laparoscopic surgery | No  | Proximal gastrectomy | No  |
| No  | Open surgery         | Yes | Proximal gastrectomy | No  |
| No  | Open surgery         | No  | Proximal gastrectomy | No  |
| No  | Laparoscopic surgery | No  | Distal gastrectomy   | No  |
| No  | Open surgery         | Yes | Total gastrectomy    | No  |
| No  | Open surgery         | Yes | Distal gastrectomy   | Yes |
| No  | Open surgery         | No  | Total gastrectomy    | Yes |
| No  | Open surgery         | No  | Distal gastrectomy   | No  |
| No  | Laparoscopic surgery | No  | Distal gastrectomy   | Yes |
| Yes | Open surgery         | No  | Distal gastrectomy   | Yes |
| No  | Open surgery         | Yes | Distal gastrectomy   | No  |
| No  | Laparoscopic surgery | Yes | Distal gastrectomy   | No  |
| Yes | Open surgery         | Yes | Total gastrectomy    | Yes |
| Yes | Laparoscopic surgery | No  | Proximal gastrectomy | No  |
| Yes | Laparoscopic surgery | No  | Proximal gastrectomy | No  |
| No  | Laparoscopic surgery | No  | Proximal gastrectomy | No  |
| No  | Open surgery         | No  | Total gastrectomy    | No  |
| No  | Laparoscopic surgery | Yes | Distal gastrectomy   | No  |
| No  | Laparoscopic surgery | No  | Distal gastrectomy   | No  |
| No  | Laparoscopic surgery | Yes | Distal gastrectomy   | No  |
| No  | Laparoscopic surgery | Yes | Proximal gastrectomy | No  |
| No  | Open surgery         | No  | Distal gastrectomy   | No  |
| No  | Laparoscopic surgery | No  | Proximal gastrectomy | No  |
| No  | Open surgery         | No  | Distal gastrectomy   | No  |
| No  | Open surgery         | No  | Proximal gastrectomy | No  |
| No  | Laparoscopic surgery | No  | Total gastrectomy    | No  |
| Yes | Laparoscopic surgery | No  | Total gastrectomy    | No  |

|     |                      |     |                      |     |
|-----|----------------------|-----|----------------------|-----|
| No  | Open surgery         | No  | Total gastrectomy    | No  |
| Yes | Laparoscopic surgery | Yes | Distal gastrectomy   | No  |
| Yes | Open surgery         | No  | Total gastrectomy    | No  |
| Yes | Open surgery         | No  | Total gastrectomy    | No  |
| No  | Laparoscopic surgery | Yes | Distal gastrectomy   | No  |
| No  | Laparoscopic surgery | Yes | Total gastrectomy    | No  |
| No  | Open surgery         | Yes | Distal gastrectomy   | No  |
| No  | Open surgery         | Yes | Total gastrectomy    | No  |
| No  | Laparoscopic surgery | No  | Proximal gastrectomy | Yes |
| No  | Open surgery         | No  | Total gastrectomy    | Yes |
| No  | Open surgery         | No  | Distal gastrectomy   | No  |
| No  | Open surgery         | No  | Total gastrectomy    | No  |
| No  | Open surgery         | No  | Proximal gastrectomy | Yes |
| No  | Open surgery         | No  | Total gastrectomy    | No  |
| No  | Laparoscopic surgery | No  | Distal gastrectomy   | Yes |
| No  | Open surgery         | No  | Distal gastrectomy   | No  |
| No  | Open surgery         | No  | Proximal gastrectomy | No  |
| Yes | Open surgery         | No  | Proximal gastrectomy | No  |
| Yes | Open surgery         | Yes | Distal gastrectomy   | No  |
| No  | Laparoscopic surgery | Yes | Distal gastrectomy   | No  |
| No  | Laparoscopic surgery | No  | Total gastrectomy    | No  |
| No  | Open surgery         | Yes | Total gastrectomy    | No  |
| Yes | Open surgery         | Yes | Distal gastrectomy   | No  |
| Yes | Open surgery         | No  | Distal gastrectomy   | No  |
| No  | Open surgery         | No  | Distal gastrectomy   | No  |
| No  | Open surgery         | Yes | Distal gastrectomy   | No  |
| No  | Open surgery         | Yes | Proximal gastrectomy | Yes |
| No  | Laparoscopic surgery | No  | Total gastrectomy    | No  |
| No  | Open surgery         | No  | Total gastrectomy    | Yes |
| No  | Open surgery         | No  | Proximal gastrectomy | No  |
| No  | Open surgery         | No  | Distal gastrectomy   | Yes |
| No  | Open surgery         | No  | Distal gastrectomy   | No  |
| No  | Open surgery         | No  | Proximal gastrectomy | No  |
| No  | Open surgery         | No  | Total gastrectomy    | No  |
| No  | Laparoscopic surgery | No  | Total gastrectomy    | Yes |
| No  | Open surgery         | Yes | Distal gastrectomy   | No  |
| No  | Laparoscopic surgery | No  | Proximal gastrectomy | No  |
| No  | Laparoscopic surgery | Yes | Proximal gastrectomy | Yes |
| No  | Open surgery         | No  | Total gastrectomy    | No  |
| No  | Laparoscopic surgery | Yes | Distal gastrectomy   | No  |
| No  | Laparoscopic surgery | Yes | Distal gastrectomy   | No  |
| No  | Laparoscopic surgery | No  | Total gastrectomy    | No  |
| Yes | Laparoscopic surgery | No  | Proximal gastrectomy | No  |
| Yes | Laparoscopic surgery | Yes | Total gastrectomy    | No  |
| Yes | Laparoscopic surgery | Yes | Distal gastrectomy   | No  |
| No  | Open surgery         | No  | Total gastrectomy    | No  |
| No  | Laparoscopic surgery | No  | Proximal gastrectomy | No  |
| No  | Open surgery         | No  | Distal gastrectomy   | No  |
| No  | Laparoscopic surgery | No  | Total gastrectomy    | No  |
| Yes | Open surgery         | No  | Total gastrectomy    | No  |
| No  | Laparoscopic surgery | No  | Distal gastrectomy   | No  |
| No  | Open surgery         | Yes | Distal gastrectomy   | No  |
| No  | Laparoscopic surgery | Yes | Distal gastrectomy   | No  |
| No  | Open surgery         | Yes | Proximal gastrectomy | No  |



|     |                      |     |                      |     |
|-----|----------------------|-----|----------------------|-----|
| No  | Laparoscopic surgery | No  | Proximal gastrectomy | Yes |
| Yes | Open surgery         | No  | Distal gastrectomy   | Yes |
| Yes | Open surgery         | Yes | Proximal gastrectomy | Yes |
| No  | Open surgery         | No  | Distal gastrectomy   | No  |
| No  | Open surgery         | Yes | Distal gastrectomy   | No  |
| No  | Open surgery         | No  | Proximal gastrectomy | Yes |
| No  | Open surgery         | Yes | Proximal gastrectomy | Yes |
| No  | Open surgery         | No  | Proximal gastrectomy | No  |
| No  | Laparoscopic surgery | No  | Total gastrectomy    | No  |
| No  | Laparoscopic surgery | No  | Total gastrectomy    | No  |
| No  | Laparoscopic surgery | No  | Total gastrectomy    | No  |
| No  | Laparoscopic surgery | Yes | Total gastrectomy    | No  |
| No  | Laparoscopic surgery | No  | Distal gastrectomy   | No  |
| No  | Laparoscopic surgery | Yes | Total gastrectomy    | Yes |
| No  | Open surgery         | Yes | Total gastrectomy    | Yes |
| Yes | Laparoscopic surgery | Yes | Total gastrectomy    | No  |
| No  | Laparoscopic surgery | No  | Proximal gastrectomy | Yes |
| No  | Open surgery         | No  | Proximal gastrectomy | Yes |
| No  | Laparoscopic surgery | Yes | Distal gastrectomy   | Yes |
| Yes | Laparoscopic surgery | No  | Distal gastrectomy   | No  |
| No  | Laparoscopic surgery | Yes | Proximal gastrectomy | No  |
| Yes | Laparoscopic surgery | No  | Proximal gastrectomy | No  |
| No  | Laparoscopic surgery | No  | Distal gastrectomy   | No  |
| No  | Open surgery         | No  | Distal gastrectomy   | No  |
| No  | Open surgery         | No  | Distal gastrectomy   | No  |
| No  | Laparoscopic surgery | No  | Total gastrectomy    | No  |
| Yes | Open surgery         | No  | Proximal gastrectomy | No  |
| No  | Open surgery         | No  | Total gastrectomy    | No  |
| Yes | Open surgery         | No  | Proximal gastrectomy | No  |
| No  | Open surgery         | No  | Total gastrectomy    | No  |
| No  | Open surgery         | No  | Total gastrectomy    | No  |
| No  | Laparoscopic surgery | No  | Total gastrectomy    | No  |
| No  | Laparoscopic surgery | Yes | Total gastrectomy    | No  |
| No  | Open surgery         | Yes | Distal gastrectomy   | No  |
| No  | Open surgery         | Yes | Proximal gastrectomy | No  |
| No  | Open surgery         | Yes | Distal gastrectomy   | No  |
| No  | Laparoscopic surgery | No  | Distal gastrectomy   | Yes |
| No  | Open surgery         | Yes | Proximal gastrectomy | Yes |
| No  | Laparoscopic surgery | Yes | Distal gastrectomy   | No  |
| No  | Laparoscopic surgery | No  | Distal gastrectomy   | No  |
| No  | Open surgery         | No  | Distal gastrectomy   | Yes |
| No  | Laparoscopic surgery | No  | Distal gastrectomy   | Yes |
| No  | Laparoscopic surgery | No  | Distal gastrectomy   | No  |
| Yes | Open surgery         | No  | Proximal gastrectomy | Yes |
| Yes | Laparoscopic surgery | No  | Distal gastrectomy   | Yes |
| Yes | Laparoscopic surgery | No  | Total gastrectomy    | Yes |
| Yes | Open surgery         | Yes | Total gastrectomy    | Yes |
| No  | Open surgery         | No  | Proximal gastrectomy | No  |
| Yes | Open surgery         | No  | Total gastrectomy    | No  |
| Yes | Laparoscopic surgery | No  | Proximal gastrectomy | No  |
| Yes | Open surgery         | Yes | Proximal gastrectomy | No  |
| No  | Open surgery         | No  | Proximal gastrectomy | No  |
| Yes | Laparoscopic surgery | No  | Proximal gastrectomy | Yes |
| Yes | Open surgery         | Yes | Proximal gastrectomy | No  |

|     |                      |     |                      |     |
|-----|----------------------|-----|----------------------|-----|
| No  | Open surgery         | Yes | Distal gastrectomy   | No  |
| No  | Laparoscopic surgery | Yes | Total gastrectomy    | Yes |
| No  | Laparoscopic surgery | No  | Total gastrectomy    | Yes |
| No  | Open surgery         | Yes | Total gastrectomy    | No  |
| No  | Open surgery         | No  | Distal gastrectomy   | No  |
| No  | Open surgery         | No  | Distal gastrectomy   | No  |
| No  | Laparoscopic surgery | No  | Total gastrectomy    | No  |
| No  | Open surgery         | No  | Total gastrectomy    | No  |
| No  | Laparoscopic surgery | Yes | Proximal gastrectomy | No  |
| No  | Open surgery         | Yes | Proximal gastrectomy | No  |
| No  | Open surgery         | Yes | Distal gastrectomy   | No  |
| No  | Open surgery         | Yes | Distal gastrectomy   | No  |
| No  | Laparoscopic surgery | Yes | Total gastrectomy    | No  |
| No  | Open surgery         | No  | Total gastrectomy    | No  |
| Yes | Open surgery         | No  | Proximal gastrectomy | No  |
| Yes | Laparoscopic surgery | No  | Total gastrectomy    | No  |
| No  | Laparoscopic surgery | No  | Distal gastrectomy   | No  |
| No  | Open surgery         | Yes | Distal gastrectomy   | No  |
| Yes | Open surgery         | Yes | Total gastrectomy    | No  |
| No  | Open surgery         | Yes | Distal gastrectomy   | No  |
| No  | Open surgery         | No  | Proximal gastrectomy | Yes |
| No  | Open surgery         | Yes | Total gastrectomy    | No  |
| No  | Laparoscopic surgery | Yes | Distal gastrectomy   | Yes |
| No  | Laparoscopic surgery | Yes | Total gastrectomy    | No  |
| No  | Open surgery         | No  | Distal gastrectomy   | Yes |
| No  | Open surgery         | No  | Distal gastrectomy   | No  |
| No  | Open surgery         | No  | Distal gastrectomy   | No  |
| No  | Laparoscopic surgery | Yes | Distal gastrectomy   | Yes |
| No  | Laparoscopic surgery | Yes | Distal gastrectomy   | Yes |
| No  | Open surgery         | No  | Distal gastrectomy   | No  |
| No  | Open surgery         | No  | Total gastrectomy    | Yes |
| No  | Open surgery         | No  | Proximal gastrectomy | No  |
| No  | Laparoscopic surgery | No  | Proximal gastrectomy | No  |
| No  | Laparoscopic surgery | No  | Total gastrectomy    | No  |
| No  | Open surgery         | No  | Distal gastrectomy   | No  |
| Yes | Open surgery         | No  | Total gastrectomy    | No  |
| No  | Open surgery         | Yes | Distal gastrectomy   | No  |
| Yes | Laparoscopic surgery | No  | Proximal gastrectomy | No  |
| Yes | Open surgery         | Yes | Total gastrectomy    | No  |
| No  | Laparoscopic surgery | No  | Proximal gastrectomy | No  |
| No  | Laparoscopic surgery | Yes | Total gastrectomy    | No  |
| No  | Laparoscopic surgery | Yes | Distal gastrectomy   | No  |
| No  | Laparoscopic surgery | No  | Distal gastrectomy   | No  |
| No  | Laparoscopic surgery | No  | Proximal gastrectomy | Yes |
| No  | Open surgery         | Yes | Proximal gastrectomy | Yes |
| No  | Laparoscopic surgery | Yes | Distal gastrectomy   | No  |
| No  | Laparoscopic surgery | No  | Total gastrectomy    | Yes |
| No  | Open surgery         | No  | Total gastrectomy    | Yes |
| No  | Laparoscopic surgery | No  | Total gastrectomy    | Yes |
| No  | Laparoscopic surgery | No  | Total gastrectomy    | Yes |
| No  | Laparoscopic surgery | No  | Proximal gastrectomy | No  |
| No  | Laparoscopic surgery | No  | Proximal gastrectomy | No  |
| No  | Laparoscopic surgery | No  | Distal gastrectomy   | No  |
| No  | Laparoscopic surgery | Yes | Total gastrectomy    | No  |

|     |                      |     |                      |     |
|-----|----------------------|-----|----------------------|-----|
| Yes | Laparoscopic surgery | No  | Total gastrectomy    | No  |
| No  | Laparoscopic surgery | No  | Proximal gastrectomy | No  |
| No  | Open surgery         | Yes | Proximal gastrectomy | No  |
| No  | Open surgery         | Yes | Distal gastrectomy   | No  |
| Yes | Laparoscopic surgery | Yes | Distal gastrectomy   | No  |
| No  | Laparoscopic surgery | Yes | Total gastrectomy    | No  |
| Yes | Open surgery         | No  | Total gastrectomy    | No  |
| No  | Open surgery         | No  | Distal gastrectomy   | No  |
| Yes | Laparoscopic surgery | No  | Distal gastrectomy   | No  |
| Yes | Laparoscopic surgery | No  | Proximal gastrectomy | No  |
| No  | Open surgery         | No  | Total gastrectomy    | No  |
| No  | Laparoscopic surgery | No  | Proximal gastrectomy | No  |
| No  | Open surgery         | No  | Total gastrectomy    | No  |
| No  | Open surgery         | No  | Total gastrectomy    | Yes |
| No  | Open surgery         | No  | Total gastrectomy    | No  |
| No  | Laparoscopic surgery | Yes | Total gastrectomy    | No  |
| No  | Open surgery         | Yes | Proximal gastrectomy | No  |
| No  | Laparoscopic surgery | No  | Proximal gastrectomy | Yes |
| Yes | Open surgery         | Yes | Distal gastrectomy   | No  |
| No  | Open surgery         | Yes | Proximal gastrectomy | Yes |
| No  | Laparoscopic surgery | Yes | Proximal gastrectomy | Yes |
| No  | Laparoscopic surgery | No  | Proximal gastrectomy | No  |
| Yes | Laparoscopic surgery | No  | Proximal gastrectomy | No  |
| Yes | Laparoscopic surgery | Yes | Total gastrectomy    | No  |
| Yes | Open surgery         | Yes | Total gastrectomy    | No  |
| No  | Open surgery         | No  | Proximal gastrectomy | No  |
| No  | Open surgery         | No  | Total gastrectomy    | No  |
| No  | Laparoscopic surgery | No  | Proximal gastrectomy | No  |
| No  | Laparoscopic surgery | No  | Proximal gastrectomy | No  |
| No  | Open surgery         | No  | Distal gastrectomy   | No  |
| No  | Laparoscopic surgery | No  | Distal gastrectomy   | No  |
| No  | Open surgery         | Yes | Distal gastrectomy   | Yes |
| No  | Open surgery         | No  | Distal gastrectomy   | Yes |
| No  | Open surgery         | No  | Proximal gastrectomy | No  |
| No  | Open surgery         | No  | Total gastrectomy    | No  |
| No  | Open surgery         | No  | Total gastrectomy    | No  |
| No  | Open surgery         | No  | Distal gastrectomy   | Yes |
| No  | Laparoscopic surgery | Yes | Total gastrectomy    | No  |
| No  | Open surgery         | Yes | Total gastrectomy    | No  |
| No  | Open surgery         | No  | Total gastrectomy    | Yes |
| No  | Open surgery         | No  | Distal gastrectomy   | Yes |
| Yes | Laparoscopic surgery | No  | Distal gastrectomy   | Yes |
| No  | Open surgery         | No  | Distal gastrectomy   | No  |
| No  | Laparoscopic surgery | No  | Proximal gastrectomy | No  |
| No  | Open surgery         | No  | Total gastrectomy    | No  |
| No  | Open surgery         | No  | Distal gastrectomy   | No  |
| No  | Open surgery         | No  | Total gastrectomy    | No  |
| No  | Laparoscopic surgery | No  | Proximal gastrectomy | No  |
| No  | Open surgery         | No  | Distal gastrectomy   | No  |
| No  | Laparoscopic surgery | No  | Distal gastrectomy   | No  |
| No  | Open surgery         | No  | Proximal gastrectomy | No  |
| No  | Open surgery         | Yes | Distal gastrectomy   | Yes |
| No  | Open surgery         | Yes | Proximal gastrectomy | Yes |
| Yes | Laparoscopic surgery | No  | Total gastrectomy    | No  |

|     |                      |     |                      |     |
|-----|----------------------|-----|----------------------|-----|
| No  | Laparoscopic surgery | Yes | Total gastrectomy    | Yes |
| No  | Open surgery         | No  | Proximal gastrectomy | No  |
| No  | Laparoscopic surgery | No  | Total gastrectomy    | Yes |
| Yes | Laparoscopic surgery | No  | Distal gastrectomy   | No  |
| No  | Laparoscopic surgery | Yes | Total gastrectomy    | Yes |
| No  | Laparoscopic surgery | Yes | Total gastrectomy    | Yes |
| Yes | Laparoscopic surgery | Yes | Distal gastrectomy   | No  |
| Yes | Open surgery         | No  | Total gastrectomy    | No  |
| No  | Open surgery         | No  | Distal gastrectomy   | Yes |
| Yes | Open surgery         | No  | Distal gastrectomy   | Yes |
| Yes | Open surgery         | No  | Total gastrectomy    | No  |
| Yes | Open surgery         | No  | Proximal gastrectomy | No  |
| No  | Open surgery         | No  | Proximal gastrectomy | No  |
| Yes | Laparoscopic surgery | No  | Total gastrectomy    | No  |
| No  | Laparoscopic surgery | No  | Proximal gastrectomy | No  |
| No  | Open surgery         | No  | Total gastrectomy    | No  |
| No  | Laparoscopic surgery | No  | Distal gastrectomy   | No  |
| No  | Laparoscopic surgery | No  | Proximal gastrectomy | No  |
| No  | Open surgery         | No  | Total gastrectomy    | No  |
| No  | Open surgery         | No  | Distal gastrectomy   | No  |
| No  | Laparoscopic surgery | Yes | Total gastrectomy    | No  |
| No  | Laparoscopic surgery | Yes | Distal gastrectomy   | No  |
| No  | Open surgery         | No  | Total gastrectomy    | No  |
| No  | Laparoscopic surgery | No  | Proximal gastrectomy | No  |
| No  | Open surgery         | No  | Total gastrectomy    | No  |
| No  | Laparoscopic surgery | No  | Total gastrectomy    | Yes |
| No  | Open surgery         | Yes | Distal gastrectomy   | Yes |
| No  | Laparoscopic surgery | Yes | Proximal gastrectomy | Yes |
| No  | Laparoscopic surgery | No  | Proximal gastrectomy | No  |
| No  | Laparoscopic surgery | No  | Total gastrectomy    | Yes |
| No  | Laparoscopic surgery | No  | Distal gastrectomy   | Yes |
| No  | Laparoscopic surgery | No  | Proximal gastrectomy | Yes |
| No  | Laparoscopic surgery | No  | Proximal gastrectomy | No  |
| No  | Open surgery         | No  | Total gastrectomy    | Yes |
| Yes | Open surgery         | No  | Proximal gastrectomy | Yes |
| No  | Laparoscopic surgery | No  | Distal gastrectomy   | Yes |
| No  | Open surgery         | No  | Proximal gastrectomy | No  |
| No  | Open surgery         | Yes | Distal gastrectomy   | No  |
| No  | Open surgery         | Yes | Total gastrectomy    | No  |
| No  | Open surgery         | Yes | Distal gastrectomy   | No  |
| No  | Open surgery         | No  | Distal gastrectomy   | No  |
| No  | Laparoscopic surgery | No  | Total gastrectomy    | No  |
| No  | Open surgery         | No  | Total gastrectomy    | No  |
| No  | Laparoscopic surgery | No  | Proximal gastrectomy | No  |
| No  | Laparoscopic surgery | No  | Total gastrectomy    | No  |
| No  | Open surgery         | No  | Proximal gastrectomy | No  |
| No  | Laparoscopic surgery | No  | Proximal gastrectomy | No  |
| No  | Open surgery         | No  | Proximal gastrectomy | No  |
| No  | Laparoscopic surgery | No  | Total gastrectomy    | No  |
| Yes | Open surgery         | No  | Distal gastrectomy   | Yes |
| No  | Open surgery         | No  | Total gastrectomy    | Yes |
| No  | Open surgery         | No  | Proximal gastrectomy | Yes |
| No  | Laparoscopic surgery | No  | Total gastrectomy    | No  |

| Surgery time | Lymph node dissection | Bleeding volume | Tachycardia | SpO2  |
|--------------|-----------------------|-----------------|-------------|-------|
| ≥270 min     | <25                   | ≥100 ml         | No          | ≥90 % |
| ≥270 min     | <25                   | <100 ml         | No          | ≥90 % |
| ≥270 min     | ≥25                   | ≥100 ml         | Yes         | <90 % |
| <270 min     | <25                   | ≥100 ml         | Yes         | ≥90 % |
| ≥270 min     | ≥25                   | ≥100 ml         | No          | <90 % |
| <270 min     | <25                   | <100 ml         | No          | ≥90 % |
| ≥270 min     | ≥25                   | <100 ml         | No          | <90 % |
| <270 min     | <25                   | <100 ml         | No          | ≥90 % |
| ≥270 min     | ≥25                   | ≥100 ml         | No          | <90 % |
| <270 min     | <25                   | <100 ml         | No          | <90 % |
| ≥270 min     | <25                   | ≥100 ml         | Yes         | ≥90 % |
| ≥270 min     | ≥25                   | ≥100 ml         | Yes         | <90 % |
| ≥270 min     | <25                   | <100 ml         | No          | ≥90 % |
| ≥270 min     | <25                   | <100 ml         | No          | <90 % |
| ≥270 min     | <25                   | ≥100 ml         | Yes         | ≥90 % |
| ≥270 min     | ≥25                   | <100 ml         | No          | <90 % |
| <270 min     | <25                   | ≥100 ml         | No          | ≥90 % |
| ≥270 min     | ≥25                   | ≥100 ml         | No          | <90 % |
| ≥270 min     | ≥25                   | ≥100 ml         | No          | <90 % |
| ≥270 min     | <25                   | ≥100 ml         | No          | ≥90 % |
| ≥270 min     | <25                   | <100 ml         | No          | ≥90 % |
| ≥270 min     | ≥25                   | ≥100 ml         | Yes         | <90 % |
| ≥270 min     | ≥25                   | <100 ml         | Yes         | <90 % |
| ≥270 min     | <25                   | ≥100 ml         | No          | ≥90 % |
| ≥270 min     | <25                   | ≥100 ml         | No          | ≥90 % |
| ≥270 min     | <25                   | <100 ml         | No          | ≥90 % |
| ≥270 min     | <25                   | <100 ml         | Yes         | ≥90 % |
| ≥270 min     | <25                   | <100 ml         | No          | ≥90 % |
| <270 min     | <25                   | ≥100 ml         | No          | ≥90 % |
| ≥270 min     | <25                   | ≥100 ml         | No          | ≥90 % |
| ≥270 min     | <25                   | ≥100 ml         | No          | ≥90 % |
| ≥270 min     | ≥25                   | ≥100 ml         | No          | ≥90 % |
| <270 min     | <25                   | <100 ml         | Yes         | ≥90 % |
| ≥270 min     | <25                   | <100 ml         | No          | ≥90 % |
| ≥270 min     | ≥25                   | <100 ml         | No          | ≥90 % |
| ≥270 min     | <25                   | ≥100 ml         | No          | ≥90 % |
| ≥270 min     | ≥25                   | ≥100 ml         | No          | <90 % |
| <270 min     | <25                   | ≥100 ml         | No          | ≥90 % |
| ≥270 min     | <25                   | <100 ml         | No          | <90 % |
| ≥270 min     | <25                   | <100 ml         | No          | ≥90 % |
| ≥270 min     | <25                   | <100 ml         | No          | ≥90 % |
| ≥270 min     | <25                   | ≥100 ml         | No          | ≥90 % |
| ≥270 min     | <25                   | ≥100 ml         | Yes         | ≥90 % |
| <270 min     | <25                   | ≥100 ml         | No          | ≥90 % |
| ≥270 min     | <25                   | <100 ml         | Yes         | ≥90 % |
| <270 min     | <25                   | <100 ml         | Yes         | ≥90 % |
| ≥270 min     | <25                   | <100 ml         | No          | ≥90 % |
| ≥270 min     | ≥25                   | ≥100 ml         | No          | <90 % |
| ≥270 min     | <25                   | ≥100 ml         | No          | ≥90 % |
| ≥270 min     | <25                   | <100 ml         | No          | ≥90 % |

|          |     |         |     |       |
|----------|-----|---------|-----|-------|
| ≥270 min | <25 | ≥100 ml | No  | ≥90 % |
| ≥270 min | <25 | ≥100 ml | No  | <90 % |
| ≥270 min | ≥25 | ≥100 ml | No  | <90 % |
| <270 min | <25 | ≥100 ml | No  | ≥90 % |
| <270 min | <25 | <100 ml | No  | ≥90 % |
| ≥270 min | ≥25 | <100 ml | No  | <90 % |
| ≥270 min | <25 | ≥100 ml | No  | ≥90 % |
| ≥270 min | <25 | <100 ml | No  | ≥90 % |
| ≥270 min | <25 | <100 ml | No  | <90 % |
| ≥270 min | <25 | <100 ml | No  | <90 % |
| ≥270 min | <25 | <100 ml | No  | ≥90 % |
| <270 min | <25 | ≥100 ml | Yes | ≥90 % |
| <270 min | <25 | ≥100 ml | No  | ≥90 % |
| ≥270 min | <25 | ≥100 ml | No  | <90 % |
| ≥270 min | ≥25 | ≥100 ml | Yes | <90 % |
| <270 min | <25 | ≥100 ml | No  | ≥90 % |
| ≥270 min | <25 | <100 ml | No  | ≥90 % |
| ≥270 min | <25 | ≥100 ml | No  | <90 % |
| ≥270 min | <25 | ≥100 ml | Yes | ≥90 % |
| ≥270 min | ≥25 | <100 ml | No  | <90 % |
| <270 min | <25 | ≥100 ml | No  | ≥90 % |
| <270 min | <25 | ≥100 ml | No  | ≥90 % |
| ≥270 min | <25 | <100 ml | No  | ≥90 % |
| ≥270 min | ≥25 | <100 ml | No  | ≥90 % |
| ≥270 min | <25 | ≥100 ml | No  | ≥90 % |
| ≥270 min | <25 | ≥100 ml | Yes | ≥90 % |
| ≥270 min | <25 | <100 ml | No  | ≥90 % |
| ≥270 min | <25 | <100 ml | No  | ≥90 % |
| ≥270 min | <25 | <100 ml | Yes | ≥90 % |
| ≥270 min | <25 | ≥100 ml | No  | <90 % |
| ≥270 min | ≥25 | ≥100 ml | No  | <90 % |
| ≥270 min | ≥25 | ≥100 ml | No  | <90 % |
| ≥270 min | <25 | ≥100 ml | Yes | ≥90 % |
| ≥270 min | <25 | <100 ml | Yes | ≥90 % |
| ≥270 min | ≥25 | ≥100 ml | No  | <90 % |
| <270 min | <25 | <100 ml | No  | ≥90 % |
| ≥270 min | <25 | <100 ml | No  | ≥90 % |
| <270 min | <25 | ≥100 ml | Yes | ≥90 % |
| <270 min | <25 | ≥100 ml | Yes | ≥90 % |
| ≥270 min | <25 | ≥100 ml | No  | ≥90 % |
| ≥270 min | <25 | ≥100 ml | No  | ≥90 % |
| <270 min | <25 | ≥100 ml | No  | ≥90 % |
| <270 min | <25 | ≥100 ml | No  | ≥90 % |
| ≥270 min | <25 | ≥100 ml | No  | ≥90 % |
| ≥270 min | <25 | ≥100 ml | No  | ≥90 % |
| ≥270 min | <25 | ≥100 ml | No  | <90 % |
| ≥270 min | <25 | ≥100 ml | No  | <90 % |
| <270 min | <25 | <100 ml | No  | ≥90 % |
| <270 min | <25 | ≥100 ml | No  | ≥90 % |

|          |     |         |     |       |
|----------|-----|---------|-----|-------|
| ≥270 min | <25 | <100 ml | No  | <90 % |
| ≥270 min | <25 | <100 ml | No  | ≥90 % |
| ≥270 min | <25 | <100 ml | No  | ≥90 % |
| ≥270 min | ≥25 | <100 ml | Yes | <90 % |
| ≥270 min | ≥25 | <100 ml | Yes | <90 % |
| <270 min | <25 | <100 ml | No  | ≥90 % |
| <270 min | <25 | <100 ml | No  | ≥90 % |
| ≥270 min | <25 | <100 ml | No  | ≥90 % |
| ≥270 min | <25 | <100 ml | No  | ≥90 % |
| ≥270 min | <25 | <100 ml | No  | ≥90 % |
| ≥270 min | <25 | <100 ml | Yes | ≥90 % |
| ≥270 min | <25 | <100 ml | No  | ≥90 % |
| <270 min | <25 | <100 ml | No  | ≥90 % |
| ≥270 min | ≥25 | ≥100 ml | No  | ≥90 % |
| ≥270 min | ≥25 | ≥100 ml | No  | ≥90 % |
| <270 min | <25 | ≥100 ml | Yes | ≥90 % |
| <270 min | <25 | ≥100 ml | No  | ≥90 % |
| <270 min | <25 | <100 ml | Yes | ≥90 % |
| <270 min | <25 | <100 ml | No  | ≥90 % |
| <270 min | <25 | <100 ml | No  | <90 % |
| <270 min | <25 | <100 ml | No  | <90 % |
| ≥270 min | <25 | <100 ml | Yes | ≥90 % |
| ≥270 min | <25 | <100 ml | Yes | <90 % |
| <270 min | <25 | <100 ml | No  | ≥90 % |
| <270 min | <25 | <100 ml | No  | ≥90 % |
| <270 min | <25 | <100 ml | No  | ≥90 % |
| <270 min | <25 | <100 ml | No  | ≥90 % |
| ≥270 min | ≥25 | <100 ml | No  | ≥90 % |
| <270 min | ≥25 | <100 ml | Yes | ≥90 % |
| <270 min | <25 | <100 ml | No  | ≥90 % |
| <270 min | ≥25 | <100 ml | Yes | ≥90 % |
| <270 min | <25 | <100 ml | No  | ≥90 % |
| <270 min | <25 | <100 ml | No  | ≥90 % |
| <270 min | <25 | <100 ml | No  | ≥90 % |
| <270 min | <25 | ≥100 ml | No  | ≥90 % |
| ≥270 min | <25 | ≥100 ml | Yes | ≥90 % |
| <270 min | <25 | <100 ml | No  | ≥90 % |
| ≥270 min | <25 | <100 ml | No  | ≥90 % |
| <270 min | <25 | <100 ml | No  | ≥90 % |
| <270 min | <25 | <100 ml | Yes | ≥90 % |
| <270 min | <25 | <100 ml | No  | ≥90 % |
| <270 min | <25 | <100 ml | No  | ≥90 % |
| <270 min | <25 | <100 ml | No  | ≥90 % |
| <270 min | <25 | <100 ml | Yes | ≥90 % |
| <270 min | <25 | <100 ml | Yes | ≥90 % |
| ≥270 min | <25 | <100 ml | Yes | <90 % |
| ≥270 min | ≥25 | <100 ml | No  | <90 % |
| <270 min | <25 | <100 ml | No  | ≥90 % |
| ≥270 min | ≥25 | <100 ml | No  | <90 % |
| <270 min | <25 | <100 ml | No  | ≥90 % |
| <270 min | <25 | <100 ml | No  | ≥90 % |
| ≥270 min | <25 | <100 ml | No  | ≥90 % |









|          |     |         |     |       |
|----------|-----|---------|-----|-------|
| ≥270 min | ≥25 | <100 ml | No  | <90 % |
| ≥270 min | ≥25 | ≥100 ml | Yes | ≥90 % |
| <270 min | <25 | ≥100 ml | Yes | ≥90 % |
| ≥270 min | ≥25 | ≥100 ml | No  | ≥90 % |
| <270 min | ≥25 | ≥100 ml | No  | ≥90 % |
| <270 min | <25 | <100 ml | No  | ≥90 % |
| <270 min | <25 | <100 ml | No  | ≥90 % |
| ≥270 min | <25 | <100 ml | No  | <90 % |
| <270 min | <25 | <100 ml | No  | ≥90 % |
| ≥270 min | <25 | <100 ml | No  | <90 % |
| <270 min | <25 | <100 ml | No  | ≥90 % |
| <270 min | <25 | <100 ml | No  | ≥90 % |
| <270 min | <25 | <100 ml | No  | ≥90 % |
| <270 min | <25 | <100 ml | No  | ≥90 % |
| <270 min | <25 | <100 ml | No  | ≥90 % |
| ≥270 min | ≥25 | <100 ml | No  | <90 % |
| <270 min | ≥25 | <100 ml | No  | ≥90 % |
| <270 min | <25 | <100 ml | Yes | ≥90 % |
| ≥270 min | ≥25 | <100 ml | Yes | ≥90 % |
| <270 min | <25 | <100 ml | No  | ≥90 % |
| <270 min | <25 | ≥100 ml | Yes | ≥90 % |
| ≥270 min | ≥25 | <100 ml | No  | ≥90 % |
| ≥270 min | ≥25 | ≥100 ml | No  | ≥90 % |
| <270 min | <25 | <100 ml | No  | ≥90 % |
| ≥270 min | ≥25 | <100 ml | No  | ≥90 % |
| <270 min | ≥25 | <100 ml | No  | ≥90 % |
| <270 min | <25 | <100 ml | No  | ≥90 % |
| ≥270 min | ≥25 | <100 ml | No  | ≥90 % |
| <270 min | <25 | <100 ml | No  | ≥90 % |
| <270 min | <25 | <100 ml | No  | ≥90 % |
| ≥270 min | <25 | <100 ml | No  | ≥90 % |
| ≥270 min | <25 | <100 ml | No  | ≥90 % |
| ≥270 min | <25 | <100 ml | Yes | <90 % |
| <270 min | <25 | <100 ml | No  | ≥90 % |
| ≥270 min | <25 | <100 ml | Yes | <90 % |
| <270 min | <25 | <100 ml | Yes | ≥90 % |
| <270 min | <25 | ≥100 ml | No  | ≥90 % |
| <270 min | <25 | <100 ml | No  | ≥90 % |
| <270 min | <25 | ≥100 ml | No  | ≥90 % |
| <270 min | <25 | ≥100 ml | No  | ≥90 % |
| <270 min | <25 | <100 ml | No  | ≥90 % |
| <270 min | <25 | ≥100 ml | No  | ≥90 % |
| <270 min | <25 | <100 ml | No  | ≥90 % |
| <270 min | <25 | <100 ml | No  | ≥90 % |
| <270 min | ≥25 | <100 ml | No  | <90 % |
| <270 min | <25 | <100 ml | No  | <90 % |
| <270 min | <25 | <100 ml | No  | ≥90 % |
| <270 min | <25 | <100 ml | No  | <90 % |
| <270 min | <25 | <100 ml | No  | ≥90 % |
| <270 min | <25 | <100 ml | No  | ≥90 % |

|          |     |         |     |       |
|----------|-----|---------|-----|-------|
| ≥270 min | ≥25 | <100 ml | No  | ≥90 % |
| <270 min | <25 | <100 ml | No  | ≥90 % |
| <270 min | <25 | <100 ml | No  | ≥90 % |
| <270 min | <25 | <100 ml | Yes | ≥90 % |
| ≥270 min | ≥25 | <100 ml | No  | <90 % |
| <270 min | ≥25 | <100 ml | No  | <90 % |
| <270 min | <25 | <100 ml | No  | ≥90 % |
| ≥270 min | ≥25 | <100 ml | No  | <90 % |
| <270 min | <25 | <100 ml | Yes | ≥90 % |
| <270 min | <25 | <100 ml | No  | ≥90 % |
| <270 min | ≥25 | <100 ml | No  | ≥90 % |
| <270 min | ≥25 | <100 ml | No  | ≥90 % |
| <270 min | <25 | <100 ml | No  | ≥90 % |
| <270 min | ≥25 | <100 ml | No  | ≥90 % |
| <270 min | ≥25 | ≥100 ml | No  | ≥90 % |
| <270 min | <25 | ≥100 ml | No  | ≥90 % |
| ≥270 min | ≥25 | <100 ml | No  | <90 % |
| <270 min | <25 | <100 ml | No  | ≥90 % |
| <270 min | <25 | <100 ml | No  | ≥90 % |
| <270 min | <25 | <100 ml | No  | ≥90 % |
| <270 min | <25 | <100 ml | No  | ≥90 % |
| <270 min | <25 | <100 ml | Yes | ≥90 % |
| <270 min | <25 | <100 ml | No  | ≥90 % |
| <270 min | <25 | <100 ml | No  | ≥90 % |
| <270 min | <25 | <100 ml | No  | ≥90 % |
| <270 min | <25 | <100 ml | Yes | ≥90 % |
| <270 min | <25 | <100 ml | No  | ≥90 % |
| <270 min | <25 | ≥100 ml | No  | ≥90 % |
| ≥270 min | ≥25 | <100 ml | No  | <90 % |
| ≥270 min | ≥25 | <100 ml | Yes | <90 % |
| <270 min | <25 | <100 ml | Yes | ≥90 % |
| ≥270 min | ≥25 | ≥100 ml | No  | ≥90 % |
| ≥270 min | ≥25 | <100 ml | No  | ≥90 % |
| <270 min | <25 | ≥100 ml | No  | ≥90 % |
| ≥270 min | ≥25 | <100 ml | No  | ≥90 % |
| <270 min | <25 | <100 ml | No  | ≥90 % |
| <270 min | <25 | <100 ml | No  | ≥90 % |
| ≥270 min | ≥25 | <100 ml | No  | ≥90 % |
| ≥270 min | ≥25 | <100 ml | No  | ≥90 % |
| <270 min | <25 | <100 ml | No  | ≥90 % |
| <270 min | <25 | <100 ml | No  | ≥90 % |
| <270 min | <25 | <100 ml | Yes | ≥90 % |
| ≥270 min | ≥25 | <100 ml | No  | <90 % |
| ≥270 min | <25 | <100 ml | No  | ≥90 % |
| <270 min | <25 | <100 ml | No  | ≥90 % |
| <270 min | <25 | <100 ml | Yes | ≥90 % |
| <270 min | <25 | <100 ml | No  | ≥90 % |
| <270 min | <25 | <100 ml | Yes | ≥90 % |
| ≥270 min | <25 | <100 ml | No  | <90 % |
| <270 min | <25 | <100 ml | No  | ≥90 % |
| <270 min | <25 | <100 ml | No  | ≥90 % |
| ≥270 min | ≥25 | ≥100 ml | No  | <90 % |



|          |     |         |     |       |
|----------|-----|---------|-----|-------|
| <270 min | ≥25 | <100 ml | No  | ≥90 % |
| <270 min | <25 | <100 ml | No  | ≥90 % |
| <270 min | <25 | <100 ml | Yes | ≥90 % |
| <270 min | <25 | <100 ml | No  | ≥90 % |
| <270 min | <25 | <100 ml | No  | ≥90 % |
| <270 min | <25 | <100 ml | Yes | ≥90 % |
| <270 min | <25 | <100 ml | No  | ≥90 % |
| <270 min | <25 | <100 ml | No  | ≥90 % |
| <270 min | <25 | <100 ml | No  | ≥90 % |
| <270 min | <25 | <100 ml | No  | ≥90 % |
| <270 min | <25 | ≥100 ml | No  | ≥90 % |
| <270 min | <25 | <100 ml | No  | ≥90 % |
| ≥270 min | ≥25 | <100 ml | No  | <90 % |
| ≥270 min | ≥25 | ≥100 ml | No  | ≥90 % |
| <270 min | ≥25 | <100 ml | No  | ≥90 % |
| <270 min | <25 | ≥100 ml | No  | ≥90 % |
| <270 min | <25 | <100 ml | No  | ≥90 % |
| <270 min | <25 | <100 ml | Yes | <90 % |
| <270 min | <25 | <100 ml | Yes | <90 % |
| <270 min | <25 | <100 ml | Yes | ≥90 % |
| ≥270 min | <25 | <100 ml | No  | ≥90 % |
| <270 min | <25 | <100 ml | No  | ≥90 % |
| <270 min | <25 | <100 ml | No  | ≥90 % |
| ≥270 min | <25 | <100 ml | No  | <90 % |
| <270 min | <25 | <100 ml | No  | <90 % |
| <270 min | <25 | <100 ml | No  | <90 % |
| <270 min | <25 | <100 ml | No  | ≥90 % |
| <270 min | ≥25 | <100 ml | No  | <90 % |
| ≥270 min | ≥25 | <100 ml | Yes | ≥90 % |
| ≥270 min | ≥25 | <100 ml | No  | ≥90 % |
| ≥270 min | ≥25 | <100 ml | No  | ≥90 % |
| <270 min | <25 | <100 ml | Yes | ≥90 % |
| ≥270 min | ≥25 | <100 ml | No  | <90 % |
| <270 min | ≥25 | <100 ml | No  | <90 % |
| <270 min | ≥25 | ≥100 ml | No  | ≥90 % |
| <270 min | ≥25 | ≥100 ml | Yes | ≥90 % |
| <270 min | <25 | ≥100 ml | No  | ≥90 % |
| <270 min | ≥25 | <100 ml | No  | <90 % |
| <270 min | <25 | <100 ml | No  | <90 % |
| ≥270 min | <25 | ≥100 ml | No  | <90 % |
| <270 min | <25 | ≥100 ml | No  | ≥90 % |
| ≥270 min | <25 | ≥100 ml | No  | ≥90 % |
| <270 min | <25 | <100 ml | No  | ≥90 % |
| <270 min | <25 | <100 ml | No  | <90 % |
| <270 min | <25 | <100 ml | No  | <90 % |
| <270 min | <25 | <100 ml | No  | <90 % |
| <270 min | <25 | <100 ml | No  | ≥90 % |
| <270 min | <25 | <100 ml | Yes | ≥90 % |
| <270 min | <25 | <100 ml | Yes | ≥90 % |
| ≥270 min | ≥25 | <100 ml | No  | ≥90 % |
| ≥270 min | ≥25 | <100 ml | Yes | ≥90 % |

|          |     |         |     |       |
|----------|-----|---------|-----|-------|
| <270 min | <25 | ≥100 ml | No  | ≥90 % |
| ≥270 min | ≥25 | <100 ml | No  | ≥90 % |
| <270 min | <25 | <100 ml | No  | ≥90 % |
| ≥270 min | ≥25 | <100 ml | Yes | ≥90 % |
| <270 min | ≥25 | <100 ml | Yes | ≥90 % |
| <270 min | ≥25 | <100 ml | No  | ≥90 % |
| <270 min | <25 | <100 ml | No  | ≥90 % |
| <270 min | <25 | <100 ml | No  | <90 % |
| <270 min | <25 | <100 ml | Yes | <90 % |
| <270 min | <25 | <100 ml | No  | ≥90 % |
| <270 min | <25 | <100 ml | No  | ≥90 % |
| <270 min | <25 | <100 ml | No  | ≥90 % |
| ≥270 min | <25 | <100 ml | No  | <90 % |
| ≥270 min | <25 | <100 ml | No  | <90 % |
| <270 min | <25 | <100 ml | No  | ≥90 % |
| ≥270 min | <25 | <100 ml | No  | ≥90 % |
| <270 min | <25 | <100 ml | No  | <90 % |
| <270 min | <25 | <100 ml | No  | ≥90 % |
| <270 min | <25 | <100 ml | No  | <90 % |
| <270 min | <25 | ≥100 ml | No  | ≥90 % |
| <270 min | <25 | <100 ml | No  | ≥90 % |
| <270 min | <25 | ≥100 ml | No  | ≥90 % |
| <270 min | ≥25 | <100 ml | No  | <90 % |
| ≥270 min | ≥25 | <100 ml | No  | ≥90 % |
| <270 min | <25 | <100 ml | Yes | ≥90 % |
| ≥270 min | ≥25 | ≥100 ml | No  | <90 % |
| <270 min | <25 | <100 ml | No  | ≥90 % |
| <270 min | <25 | <100 ml | No  | ≥90 % |
| ≥270 min | <25 | <100 ml | Yes | <90 % |
| ≥270 min | <25 | <100 ml | No  | ≥90 % |
| <270 min | <25 | <100 ml | No  | ≥90 % |
| <270 min | <25 | <100 ml | No  | ≥90 % |
| <270 min | <25 | <100 ml | No  | ≥90 % |
| <270 min | <25 | <100 ml | No  | ≥90 % |
| <270 min | <25 | <100 ml | No  | ≥90 % |
| <270 min | <25 | <100 ml | No  | ≥90 % |
| <270 min | <25 | ≥100 ml | No  | ≥90 % |
| <270 min | <25 | <100 ml | No  | ≥90 % |
| <270 min | <25 | <100 ml | No  | <90 % |
| <270 min | <25 | <100 ml | No  | ≥90 % |
| <270 min | <25 | <100 ml | No  | ≥90 % |
| <270 min | <25 | <100 ml | No  | ≥90 % |
| <270 min | <25 | <100 ml | No  | ≥90 % |
| <270 min | <25 | <100 ml | No  | ≥90 % |
| ≥270 min | ≥25 | <100 ml | No  | <90 % |
| ≥270 min | ≥25 | <100 ml | No  | ≥90 % |
| <270 min | <25 | <100 ml | No  | ≥90 % |
| <270 min | ≥25 | <100 ml | No  | <90 % |
| <270 min | ≥25 | ≥100 ml | No  | <90 % |
| <270 min | <25 | ≥100 ml | Yes | ≥90 % |
| <270 min | ≥25 | <100 ml | No  | <90 % |
| <270 min | <25 | <100 ml | No  | ≥90 % |
| <270 min | <25 | ≥100 ml | No  | ≥90 % |
| <270 min | <25 | ≥100 ml | No  | ≥90 % |
| <270 min | ≥25 | <100 ml | No  | <90 % |





|          |     |         |     |       |
|----------|-----|---------|-----|-------|
| <270 min | <25 | ≥100 ml | No  | ≥90 % |
| <270 min | <25 | <100 ml | No  | <90 % |
| <270 min | <25 | <100 ml | No  | <90 % |
| <270 min | <25 | <100 ml | No  | <90 % |
| <270 min | <25 | <100 ml | No  | <90 % |
| ≥270 min | <25 | <100 ml | No  | <90 % |
| <270 min | <25 | <100 ml | No  | ≥90 % |
| <270 min | <25 | <100 ml | No  | ≥90 % |
| <270 min | <25 | <100 ml | Yes | ≥90 % |
| <270 min | <25 | <100 ml | Yes | ≥90 % |
| ≥270 min | <25 | <100 ml | No  | ≥90 % |
| ≥270 min | <25 | <100 ml | Yes | <90 % |
| <270 min | ≥25 | <100 ml | No  | <90 % |
| <270 min | <25 | <100 ml | Yes | <90 % |
| ≥270 min | ≥25 | <100 ml | No  | <90 % |
| ≥270 min | ≥25 | <100 ml | No  | <90 % |
| ≥270 min | <25 | <100 ml | No  | ≥90 % |
| ≥270 min | <25 | ≥100 ml | No  | ≥90 % |
| ≥270 min | <25 | <100 ml | No  | ≥90 % |
| <270 min | <25 | ≥100 ml | No  | <90 % |
| ≥270 min | ≥25 | ≥100 ml | No  | <90 % |
| <270 min | <25 | <100 ml | No  | <90 % |
| ≥270 min | ≥25 | <100 ml | No  | <90 % |
| <270 min | <25 | ≥100 ml | No  | <90 % |
| ≥270 min | ≥25 | <100 ml | No  | ≥90 % |
| <270 min | <25 | ≥100 ml | No  | ≥90 % |
| <270 min | <25 | <100 ml | No  | ≥90 % |
| ≥270 min | ≥25 | ≥100 ml | No  | ≥90 % |
| <270 min | <25 | ≥100 ml | No  | ≥90 % |
| ≥270 min | <25 | <100 ml | Yes | ≥90 % |
| ≥270 min | <25 | <100 ml | No  | ≥90 % |
| ≥270 min | <25 | <100 ml | No  | ≥90 % |
| <270 min | <25 | <100 ml | Yes | <90 % |
| ≥270 min | ≥25 | <100 ml | Yes | <90 % |
| <270 min | ≥25 | <100 ml | No  | <90 % |
| <270 min | ≥25 | <100 ml | No  | <90 % |
| <270 min | <25 | <100 ml | No  | <90 % |
| <270 min | <25 | <100 ml | No  | <90 % |
| <270 min | <25 | <100 ml | No  | <90 % |
| ≥270 min | ≥25 | <100 ml | No  | <90 % |
| <270 min | <25 | <100 ml | No  | ≥90 % |
| <270 min | <25 | <100 ml | No  | ≥90 % |
| ≥270 min | <25 | <100 ml | No  | ≥90 % |
| <270 min | <25 | <100 ml | No  | ≥90 % |
| <270 min | <25 | ≥100 ml | No  | <90 % |
| <270 min | <25 | ≥100 ml | No  | <90 % |
| <270 min | <25 | ≥100 ml | No  | <90 % |
| <270 min | <25 | <100 ml | No  | <90 % |
| <270 min | <25 | ≥100 ml | No  | ≥90 % |
| ≥270 min | <25 | <100 ml | No  | <90 % |
| ≥270 min | <25 | ≥100 ml | No  | <90 % |
| <270 min | <25 | <100 ml | No  | <90 % |

|          |     |         |     |       |
|----------|-----|---------|-----|-------|
| <270 min | <25 | <100 ml | Yes | <90 % |
| <270 min | <25 | ≥100 ml | No  | <90 % |
| <270 min | <25 | ≥100 ml | No  | <90 % |
| <270 min | <25 | <100 ml | No  | <90 % |
| <270 min | <25 | <100 ml | No  | <90 % |
| ≥270 min | ≥25 | <100 ml | No  | ≥90 % |
| <270 min | <25 | <100 ml | No  | ≥90 % |
| ≥270 min | ≥25 | <100 ml | No  | ≥90 % |
| <270 min | <25 | <100 ml | No  | ≥90 % |
| <270 min | ≥25 | <100 ml | No  | ≥90 % |
| <270 min | <25 | <100 ml | No  | ≥90 % |
| <270 min | <25 | <100 ml | No  | ≥90 % |
| <270 min | <25 | <100 ml | No  | ≥90 % |
| <270 min | ≥25 | <100 ml | No  | ≥90 % |
| <270 min | <25 | <100 ml | No  | ≥90 % |
| <270 min | <25 | <100 ml | No  | ≥90 % |
| <270 min | <25 | <100 ml | No  | ≥90 % |
| <270 min | <25 | <100 ml | No  | <90 % |
| <270 min | <25 | ≥100 ml | No  | <90 % |
| <270 min | <25 | <100 ml | Yes | <90 % |
| ≥270 min | ≥25 | ≥100 ml | Yes | <90 % |
| <270 min | ≥25 | ≥100 ml | No  | ≥90 % |
| <270 min | ≥25 | ≥100 ml | No  | ≥90 % |
| <270 min | <25 | <100 ml | No  | ≥90 % |
| <270 min | <25 | <100 ml | No  | ≥90 % |
| <270 min | <25 | <100 ml | No  | ≥90 % |
| <270 min | <25 | <100 ml | Yes | <90 % |
| <270 min | ≥25 | <100 ml | No  | <90 % |
| <270 min | <25 | <100 ml | Yes | <90 % |
| <270 min | <25 | ≥100 ml | Yes | <90 % |
| <270 min | <25 | ≥100 ml | No  | ≥90 % |
| <270 min | ≥25 | <100 ml | No  | <90 % |
| ≥270 min | <25 | <100 ml | No  | <90 % |
| ≥270 min | <25 | ≥100 ml | No  | <90 % |
| <270 min | <25 | <100 ml | No  | ≥90 % |
| <270 min | <25 | <100 ml | No  | ≥90 % |
| <270 min | <25 | <100 ml | No  | <90 % |
| <270 min | <25 | <100 ml | No  | <90 % |
| ≥270 min | <25 | <100 ml | No  | <90 % |
| ≥270 min | <25 | <100 ml | No  | <90 % |
| <270 min | ≥25 | <100 ml | No  | <90 % |
| <270 min | <25 | <100 ml | No  | ≥90 % |
| <270 min | <25 | <100 ml | No  | ≥90 % |
| <270 min | <25 | <100 ml | Yes | ≥90 % |
| <270 min | <25 | <100 ml | No  | ≥90 % |
| <270 min | <25 | <100 ml | Yes | ≥90 % |
| <270 min | ≥25 | <100 ml | No  | ≥90 % |
| <270 min | ≥25 | <100 ml | No  | ≥90 % |
| <270 min | ≥25 | <100 ml | Yes | ≥90 % |
| <270 min | <25 | <100 ml | Yes | ≥90 % |
| <270 min | <25 | <100 ml | No  | ≥90 % |
| <270 min | <25 | <100 ml | No  | ≥90 % |
| <270 min | <25 | <100 ml | No  | ≥90 % |

|          |     |         |     |       |
|----------|-----|---------|-----|-------|
| ≥270 min | ≥25 | <100 ml | No  | <90 % |
| <270 min | <25 | ≥100 ml | No  | ≥90 % |
| <270 min | <25 | <100 ml | No  | ≥90 % |
| <270 min | <25 | <100 ml | No  | <90 % |
| <270 min | ≥25 | <100 ml | No  | <90 % |
| <270 min | ≥25 | ≥100 ml | No  | <90 % |
| <270 min | ≥25 | ≥100 ml | No  | <90 % |
| <270 min | <25 | <100 ml | No  | <90 % |
| <270 min | <25 | ≥100 ml | No  | ≥90 % |
| <270 min | <25 | ≥100 ml | No  | ≥90 % |
| <270 min | <25 | <100 ml | No  | ≥90 % |
| ≥270 min | ≥25 | <100 ml | No  | ≥90 % |
| ≥270 min | ≥25 | <100 ml | Yes | ≥90 % |
| ≥270 min | <25 | <100 ml | Yes | <90 % |
| <270 min | <25 | <100 ml | No  | <90 % |
| <270 min | <25 | <100 ml | Yes | <90 % |
| <270 min | <25 | <100 ml | Yes | <90 % |
| <270 min | <25 | <100 ml | No  | ≥90 % |
| <270 min | <25 | <100 ml | No  | ≥90 % |
| <270 min | <25 | <100 ml | No  | ≥90 % |
| <270 min | <25 | <100 ml | No  | <90 % |
| <270 min | <25 | <100 ml | No  | <90 % |
| <270 min | <25 | <100 ml | No  | <90 % |
| ≥270 min | <25 | <100 ml | No  | <90 % |
| <270 min | <25 | <100 ml | No  | <90 % |
| <270 min | <25 | <100 ml | No  | ≥90 % |
| <270 min | <25 | <100 ml | No  | ≥90 % |
| <270 min | <25 | ≥100 ml | No  | ≥90 % |
| <270 min | <25 | <100 ml | No  | ≥90 % |
| <270 min | <25 | <100 ml | No  | ≥90 % |
| ≥270 min | ≥25 | ≥100 ml | No  | <90 % |
| <270 min | <25 | <100 ml | Yes | <90 % |
| <270 min | <25 | <100 ml | No  | ≥90 % |
| <270 min | <25 | ≥100 ml | No  | ≥90 % |
| ≥270 min | ≥25 | ≥100 ml | No  | ≥90 % |
| ≥270 min | ≥25 | <100 ml | No  | ≥90 % |
| <270 min | ≥25 | <100 ml | No  | ≥90 % |
| <270 min | <25 | <100 ml | No  | ≥90 % |
| <270 min | <25 | ≥100 ml | No  | ≥90 % |
| <270 min | <25 | ≥100 ml | No  | <90 % |
| <270 min | <25 | <100 ml | No  | <90 % |
| ≥270 min | ≥25 | <100 ml | No  | <90 % |
| ≥270 min | ≥25 | <100 ml | No  | <90 % |
| ≥270 min | ≥25 | <100 ml | No  | <90 % |
| <270 min | <25 | <100 ml | Yes | ≥90 % |
| <270 min | <25 | <100 ml | No  | ≥90 % |
| <270 min | <25 | <100 ml | Yes | ≥90 % |
| <270 min | <25 | <100 ml | Yes | ≥90 % |
| <270 min | <25 | <100 ml | No  | ≥90 % |
| <270 min | <25 | <100 ml | No  | <90 % |
| <270 min | <25 | <100 ml | Yes | <90 % |
| <270 min | <25 | <100 ml | Yes | <90 % |
| <270 min | <25 | <100 ml | No  | <90 % |
| <270 min | <25 | <100 ml | No  | ≥90 % |

|          |     |         |     |       |
|----------|-----|---------|-----|-------|
| <270 min | <25 | <100 ml | No  | ≥90 % |
| <270 min | <25 | <100 ml | No  | ≥90 % |
| ≥270 min | <25 | <100 ml | No  | <90 % |
| ≥270 min | ≥25 | <100 ml | No  | <90 % |
| <270 min | <25 | <100 ml | No  | ≥90 % |
| <270 min | ≥25 | <100 ml | No  | <90 % |
| <270 min | <25 | <100 ml | No  | ≥90 % |
| <270 min | <25 | ≥100 ml | No  | ≥90 % |
| <270 min | ≥25 | ≥100 ml | No  | <90 % |
| <270 min | <25 | <100 ml | No  | ≥90 % |
| <270 min | ≥25 | <100 ml | No  | <90 % |
| <270 min | <25 | <100 ml | No  | ≥90 % |
| <270 min | <25 | <100 ml | Yes | ≥90 % |
| <270 min | <25 | <100 ml | Yes | ≥90 % |
| <270 min | <25 | <100 ml | No  | ≥90 % |
| <270 min | <25 | <100 ml | No  | ≥90 % |
| ≥270 min | ≥25 | <100 ml | Yes | ≥90 % |
| <270 min | ≥25 | ≥100 ml | No  | ≥90 % |
| <270 min | <25 | <100 ml | Yes | ≥90 % |
| <270 min | ≥25 | ≥100 ml | No  | ≥90 % |
| <270 min | <25 | <100 ml | Yes | ≥90 % |
| <270 min | <25 | <100 ml | No  | ≥90 % |
| <270 min | ≥25 | ≥100 ml | No  | ≥90 % |
| <270 min | ≥25 | ≥100 ml | No  | ≥90 % |
| ≥270 min | ≥25 | <100 ml | No  | <90 % |
| <270 min | <25 | <100 ml | No  | <90 % |
| <270 min | <25 | <100 ml | No  | <90 % |
| <270 min | <25 | ≥100 ml | No  | <90 % |
| <270 min | <25 | ≥100 ml | No  | ≥90 % |
| ≥270 min | ≥25 | <100 ml | No  | <90 % |
| <270 min | <25 | <100 ml | No  | ≥90 % |
| <270 min | <25 | <100 ml | No  | <90 % |
| <270 min | <25 | <100 ml | Yes | <90 % |
| <270 min | <25 | <100 ml | Yes | <90 % |
| ≥270 min | <25 | <100 ml | No  | <90 % |
| <270 min | <25 | <100 ml | Yes | <90 % |
| <270 min | <25 | <100 ml | Yes | <90 % |
| <270 min | <25 | <100 ml | No  | <90 % |
| <270 min | <25 | <100 ml | No  | <90 % |
| ≥270 min | <25 | <100 ml | No  | ≥90 % |
| ≥270 min | <25 | ≥100 ml | No  | ≥90 % |
| <270 min | ≥25 | ≥100 ml | No  | ≥90 % |
| <270 min | <25 | ≥100 ml | No  | ≥90 % |
| <270 min | ≥25 | ≥100 ml | No  | ≥90 % |
| <270 min | ≥25 | ≥100 ml | No  | ≥90 % |
| <270 min | ≥25 | <100 ml | No  | ≥90 % |
| <270 min | <25 | <100 ml | No  | ≥90 % |
| <270 min | <25 | <100 ml | No  | <90 % |
| <270 min | ≥25 | <100 ml | No  | ≥90 % |
| <270 min | ≥25 | <100 ml | Yes | <90 % |
| <270 min | <25 | <100 ml | Yes | <90 % |
| <270 min | ≥25 | <100 ml | No  | ≥90 % |
| <270 min | <25 | <100 ml | No  | ≥90 % |

|          |     |         |     |       |
|----------|-----|---------|-----|-------|
| <270 min | <25 | <100 ml | No  | ≥90 % |
| ≥270 min | <25 | <100 ml | No  | <90 % |
| ≥270 min | <25 | <100 ml | No  | <90 % |
| ≥270 min | <25 | <100 ml | No  | ≥90 % |
| <270 min | <25 | <100 ml | No  | <90 % |
| <270 min | <25 | <100 ml | Yes | ≥90 % |
| <270 min | <25 | <100 ml | Yes | ≥90 % |
| <270 min | <25 | ≥100 ml | Yes | ≥90 % |
| ≥270 min | <25 | <100 ml | No  | <90 % |
| <270 min | <25 | ≥100 ml | Yes | ≥90 % |
| <270 min | ≥25 | <100 ml | No  | ≥90 % |
| <270 min | ≥25 | ≥100 ml | Yes | ≥90 % |
| ≥270 min | <25 | <100 ml | Yes | <90 % |
| ≥270 min | ≥25 | ≥100 ml | No  | ≥90 % |
| <270 min | <25 | ≥100 ml | No  | ≥90 % |
| <270 min | ≥25 | <100 ml | No  | ≥90 % |
| ≥270 min | ≥25 | <100 ml | No  | ≥90 % |
| ≥270 min | <25 | <100 ml | No  | <90 % |
| <270 min | <25 | ≥100 ml | No  | <90 % |
| ≥270 min | <25 | ≥100 ml | No  | ≥90 % |
| ≥270 min | ≥25 | ≥100 ml | No  | ≥90 % |
| ≥270 min | ≥25 | <100 ml | No  | <90 % |
| ≥270 min | ≥25 | <100 ml | Yes | ≥90 % |
| <270 min | ≥25 | ≥100 ml | Yes | ≥90 % |
| ≥270 min | <25 | ≥100 ml | No  | ≥90 % |
| ≥270 min | <25 | ≥100 ml | No  | ≥90 % |
| ≥270 min | <25 | ≥100 ml | No  | ≥90 % |
| ≥270 min | ≥25 | <100 ml | Yes | ≥90 % |
| ≥270 min | ≥25 | ≥100 ml | Yes | ≥90 % |
| <270 min | ≥25 | ≥100 ml | No  | ≥90 % |
| <270 min | <25 | ≥100 ml | Yes | ≥90 % |
| ≥270 min | ≥25 | ≥100 ml | No  | ≥90 % |
| ≥270 min | ≥25 | ≥100 ml | No  | ≥90 % |
| ≥270 min | ≥25 | <100 ml | No  | ≥90 % |
| ≥270 min | <25 | <100 ml | No  | ≥90 % |
| ≥270 min | ≥25 | <100 ml | Yes | ≥90 % |
| <270 min | <25 | ≥100 ml | No  | <90 % |
| <270 min | <25 | ≥100 ml | No  | ≥90 % |
| <270 min | <25 | <100 ml | No  | ≥90 % |
| <270 min | <25 | ≥100 ml | No  | ≥90 % |
| ≥270 min | ≥25 | ≥100 ml | No  | ≥90 % |
| <270 min | <25 | ≥100 ml | No  | <90 % |
| <270 min | <25 | ≥100 ml | No  | ≥90 % |
| ≥270 min | ≥25 | <100 ml | No  | <90 % |
| ≥270 min | ≥25 | <100 ml | No  | <90 % |
| ≥270 min | ≥25 | ≥100 ml | No  | ≥90 % |
| ≥270 min | ≥25 | ≥100 ml | No  | ≥90 % |
| <270 min | ≥25 | <100 ml | No  | ≥90 % |
| <270 min | ≥25 | <100 ml | No  | ≥90 % |
| <270 min | ≥25 | <100 ml | No  | ≥90 % |
| <270 min | ≥25 | <100 ml | No  | ≥90 % |
| <270 min | ≥25 | <100 ml | No  | ≥90 % |
| <270 min | <25 | ≥100 ml | No  | ≥90 % |
| <270 min | ≥25 | ≥100 ml | No  | ≥90 % |
| <270 min | <25 | ≥100 ml | No  | ≥90 % |

|          |     |         |     |       |
|----------|-----|---------|-----|-------|
| <270 min | ≥25 | <100 ml | Yes | ≥90 % |
| <270 min | ≥25 | <100 ml | Yes | <90 % |
| ≥270 min | ≥25 | <100 ml | No  | <90 % |
| <270 min | <25 | ≥100 ml | No  | ≥90 % |
| ≥270 min | <25 | <100 ml | No  | ≥90 % |
| <270 min | ≥25 | <100 ml | Yes | ≥90 % |
| ≥270 min | <25 | ≥100 ml | Yes | ≥90 % |
| <270 min | <25 | ≥100 ml | No  | ≥90 % |
| <270 min | <25 | <100 ml | No  | ≥90 % |
| <270 min | ≥25 | <100 ml | No  | ≥90 % |
| <270 min | ≥25 | <100 ml | No  | ≥90 % |
| <270 min | ≥25 | <100 ml | No  | ≥90 % |
| <270 min | <25 | <100 ml | No  | ≥90 % |
| <270 min | ≥25 | <100 ml | No  | ≥90 % |
| <270 min | <25 | ≥100 ml | No  | ≥90 % |
| <270 min | ≥25 | ≥100 ml | No  | ≥90 % |
| <270 min | <25 | <100 ml | No  | <90 % |
| ≥270 min | ≥25 | ≥100 ml | No  | <90 % |
| <270 min | <25 | <100 ml | Yes | ≥90 % |
| ≥270 min | ≥25 | <100 ml | No  | ≥90 % |
| ≥270 min | <25 | ≥100 ml | Yes | ≥90 % |
| <270 min | <25 | <100 ml | No  | ≥90 % |
| ≥270 min | ≥25 | <100 ml | No  | ≥90 % |
| ≥270 min | <25 | <100 ml | No  | ≥90 % |
| ≥270 min | <25 | <100 ml | No  | ≥90 % |
| ≥270 min | <25 | <100 ml | Yes | ≥90 % |
| <270 min | <25 | <100 ml | Yes | ≥90 % |
| <270 min | <25 | <100 ml | Yes | ≥90 % |
| <270 min | ≥25 | <100 ml | Yes | ≥90 % |
| <270 min | <25 | ≥100 ml | No  | ≥90 % |
| <270 min | ≥25 | <100 ml | Yes | ≥90 % |
| <270 min | <25 | ≥100 ml | Yes | ≥90 % |
| <270 min | ≥25 | <100 ml | No  | ≥90 % |
| <270 min | <25 | <100 ml | No  | ≥90 % |
| <270 min | <25 | <100 ml | No  | ≥90 % |
| <270 min | ≥25 | <100 ml | No  | <90 % |
| ≥270 min | <25 | <100 ml | No  | ≥90 % |
| <270 min | ≥25 | <100 ml | No  | ≥90 % |
| <270 min | <25 | <100 ml | Yes | <90 % |
| ≥270 min | ≥25 | <100 ml | No  | <90 % |
| <270 min | ≥25 | <100 ml | No  | ≥90 % |
| ≥270 min | <25 | ≥100 ml | No  | ≥90 % |
| ≥270 min | <25 | ≥100 ml | No  | ≥90 % |
| ≥270 min | ≥25 | <100 ml | No  | ≥90 % |
| <270 min | <25 | <100 ml | No  | ≥90 % |
| <270 min | ≥25 | ≥100 ml | No  | ≥90 % |
| <270 min | <25 | <100 ml | No  | ≥90 % |
| <270 min | ≥25 | <100 ml | No  | ≥90 % |
| <270 min | ≥25 | <100 ml | No  | ≥90 % |
| <270 min | ≥25 | <100 ml | No  | ≥90 % |
| <270 min | ≥25 | <100 ml | No  | ≥90 % |
| <270 min | <25 | ≥100 ml | No  | ≥90 % |

|          |     |         |     |       |
|----------|-----|---------|-----|-------|
| ≥270 min | ≥25 | ≥100 ml | No  | <90 % |
| <270 min | <25 | <100 ml | No  | ≥90 % |
| ≥270 min | ≥25 | <100 ml | No  | ≥90 % |
| ≥270 min | ≥25 | ≥100 ml | Yes | ≥90 % |
| ≥270 min | ≥25 | ≥100 ml | Yes | ≥90 % |
| ≥270 min | <25 | <100 ml | No  | ≥90 % |
| <270 min | ≥25 | <100 ml | No  | ≥90 % |
| <270 min | <25 | <100 ml | No  | ≥90 % |
| <270 min | ≥25 | <100 ml | No  | ≥90 % |
| <270 min | <25 | ≥100 ml | No  | ≥90 % |
| <270 min | ≥25 | ≥100 ml | No  | ≥90 % |
| <270 min | <25 | <100 ml | No  | <90 % |
| <270 min | <25 | <100 ml | No  | <90 % |
| <270 min | <25 | <100 ml | No  | <90 % |
| <270 min | <25 | <100 ml | No  | <90 % |
| <270 min | <25 | <100 ml | No  | <90 % |
| <270 min | <25 | <100 ml | No  | ≥90 % |
| <270 min | <25 | <100 ml | No  | <90 % |
| <270 min | <25 | ≥100 ml | Yes | <90 % |
| <270 min | ≥25 | <100 ml | Yes | ≥90 % |
| ≥270 min | ≥25 | <100 ml | No  | ≥90 % |
| <270 min | ≥25 | ≥100 ml | Yes | ≥90 % |
| ≥270 min | ≥25 | <100 ml | Yes | ≥90 % |
| <270 min | ≥25 | <100 ml | No  | ≥90 % |
| <270 min | <25 | <100 ml | No  | ≥90 % |
| ≥270 min | <25 | <100 ml | No  | ≥90 % |
| <270 min | <25 | <100 ml | No  | ≥90 % |
| <270 min | <25 | <100 ml | No  | ≥90 % |
| <270 min | <25 | <100 ml | No  | <90 % |
| <270 min | <25 | ≥100 ml | No  | ≥90 % |
| <270 min | <25 | ≥100 ml | No  | ≥90 % |
| <270 min | <25 | <100 ml | Yes | ≥90 % |
| <270 min | <25 | <100 ml | Yes | <90 % |
| <270 min | <25 | <100 ml | No  | <90 % |
| <270 min | ≥25 | <100 ml | No  | <90 % |
| <270 min | <25 | <100 ml | Yes | ≥90 % |
| <270 min | <25 | <100 ml | Yes | ≥90 % |
| <270 min | ≥25 | <100 ml | No  | ≥90 % |
| <270 min | <25 | <100 ml | Yes | ≥90 % |
| ≥270 min | <25 | <100 ml | No  | ≥90 % |
| <270 min | <25 | <100 ml | No  | ≥90 % |
| <270 min | <25 | <100 ml | Yes | ≥90 % |
| ≥270 min | <25 | <100 ml | No  | ≥90 % |
| ≥270 min | <25 | ≥100 ml | Yes | ≥90 % |
| <270 min | <25 | ≥100 ml | No  | ≥90 % |
| <270 min | <25 | <100 ml | No  | ≥90 % |
| ≥270 min | <25 | <100 ml | No  | ≥90 % |
| ≥270 min | <25 | ≥100 ml | No  | ≥90 % |
| <270 min | <25 | <100 ml | No  | <90 % |
| <270 min | <25 | ≥100 ml | No  | <90 % |
| <270 min | <25 | <100 ml | Yes | ≥90 % |
| <270 min | <25 | <100 ml | No  | <90 % |
| <270 min | <25 | <100 ml | No  | ≥90 % |
| <270 min | <25 | <100 ml | No  | ≥90 % |

|          |     |         |     |       |
|----------|-----|---------|-----|-------|
| <270 min | ≥25 | <100 ml | No  | ≥90 % |
| <270 min | <25 | <100 ml | No  | ≥90 % |
| <270 min | ≥25 | <100 ml | No  | ≥90 % |
| <270 min | ≥25 | <100 ml | No  | <90 % |
| <270 min | ≥25 | <100 ml | No  | ≥90 % |
| <270 min | <25 | <100 ml | No  | <90 % |
| <270 min | ≥25 | ≥100 ml | No  | <90 % |
| <270 min | ≥25 | <100 ml | No  | <90 % |
| <270 min | <25 | ≥100 ml | No  | <90 % |
| <270 min | <25 | <100 ml | No  | ≥90 % |
| <270 min | <25 | <100 ml | No  | ≥90 % |
| <270 min | <25 | <100 ml | Yes | ≥90 % |
| <270 min | <25 | <100 ml | Yes | ≥90 % |
| <270 min | <25 | <100 ml | Yes | ≥90 % |
| <270 min | <25 | <100 ml | No  | ≥90 % |
| ≥270 min | <25 | <100 ml | No  | ≥90 % |
| <270 min | <25 | <100 ml | No  | ≥90 % |
| ≥270 min | <25 | <100 ml | No  | ≥90 % |
| <270 min | <25 | <100 ml | No  | ≥90 % |
| ≥270 min | <25 | <100 ml | No  | ≥90 % |
| <270 min | <25 | <100 ml | No  | ≥90 % |
| <270 min | <25 | <100 ml | No  | ≥90 % |
| <270 min | ≥25 | <100 ml | No  | ≥90 % |
| ≥270 min | <25 | <100 ml | No  | ≥90 % |
| ≥270 min | <25 | ≥100 ml | No  | ≥90 % |
| <270 min | <25 | <100 ml | No  | ≥90 % |
| <270 min | <25 | <100 ml | Yes | ≥90 % |
| <270 min | <25 | <100 ml | Yes | <90 % |
| <270 min | <25 | <100 ml | Yes | ≥90 % |
| <270 min | <25 | ≥100 ml | No  | ≥90 % |
| <270 min | <25 | ≥100 ml | No  | ≥90 % |
| ≥270 min | <25 | <100 ml | No  | ≥90 % |
| <270 min | <25 | ≥100 ml | No  | ≥90 % |
| ≥270 min | <25 | ≥100 ml | No  | ≥90 % |
| <270 min | <25 | ≥100 ml | No  | ≥90 % |
| <270 min | ≥25 | ≥100 ml | No  | ≥90 % |
| ≥270 min | ≥25 | <100 ml | No  | ≥90 % |
| <270 min | <25 | <100 ml | No  | ≥90 % |
| ≥270 min | <25 | <100 ml | Yes | ≥90 % |
| <270 min | ≥25 | <100 ml | Yes | ≥90 % |
| <270 min | <25 | <100 ml | Yes | ≥90 % |
| <270 min | <25 | <100 ml | No  | ≥90 % |
| <270 min | ≥25 | <100 ml | No  | ≥90 % |
| <270 min | ≥25 | <100 ml | No  | ≥90 % |
| <270 min | <25 | <100 ml | No  | ≥90 % |
| <270 min | <25 | <100 ml | No  | <90 % |
| <270 min | <25 | <100 ml | No  | ≥90 % |
| <270 min | <25 | ≥100 ml | No  | ≥90 % |
| <270 min | <25 | <100 ml | No  | ≥90 % |
| <270 min | <25 | ≥100 ml | Yes | ≥90 % |
| <270 min | <25 | ≥100 ml | Yes | ≥90 % |
| <270 min | <25 | <100 ml | Yes | ≥90 % |
| <270 min | <25 | <100 ml | Yes | ≥90 % |





|          |     |         |     |       |
|----------|-----|---------|-----|-------|
| ≥270 min | <25 | <100 ml | No  | ≥90 % |
| <270 min | <25 | <100 ml | No  | ≥90 % |
| <270 min | <25 | <100 ml | No  | ≥90 % |
| ≥270 min | <25 | <100 ml | Yes | ≥90 % |
| <270 min | <25 | <100 ml | Yes | ≥90 % |
| <270 min | <25 | <100 ml | No  | ≥90 % |
| <270 min | <25 | <100 ml | Yes | ≥90 % |
| <270 min | <25 | <100 ml | Yes | ≥90 % |
| ≥270 min | <25 | ≥100 ml | No  | ≥90 % |
| <270 min | ≥25 | ≥100 ml | No  | ≥90 % |
| <270 min | ≥25 | ≥100 ml | Yes | ≥90 % |
| <270 min | <25 | <100 ml | Yes | ≥90 % |
| ≥270 min | ≥25 | ≥100 ml | Yes | ≥90 % |
| <270 min | ≥25 | <100 ml | Yes | ≥90 % |
| ≥270 min | ≥25 | <100 ml | No  | ≥90 % |
| <270 min | <25 | <100 ml | No  | <90 % |
| ≥270 min | <25 | <100 ml | No  | <90 % |
| ≥270 min | ≥25 | <100 ml | No  | ≥90 % |
| <270 min | <25 | <100 ml | Yes | ≥90 % |
| <270 min | <25 | <100 ml | Yes | ≥90 % |
| <270 min | ≥25 | <100 ml | No  | <90 % |
| <270 min | ≥25 | <100 ml | Yes | ≥90 % |
| <270 min | <25 | <100 ml | No  | ≥90 % |
| <270 min | <25 | ≥100 ml | No  | <90 % |
| <270 min | <25 | ≥100 ml | No  | <90 % |
| <270 min | <25 | ≥100 ml | No  | <90 % |
| <270 min | <25 | <100 ml | No  | <90 % |
| <270 min | <25 | <100 ml | No  | ≥90 % |
| <270 min | <25 | <100 ml | No  | <90 % |
| <270 min | <25 | ≥100 ml | No  | ≥90 % |
| <270 min | <25 | <100 ml | No  | ≥90 % |
| <270 min | ≥25 | <100 ml | Yes | <90 % |
| <270 min | ≥25 | <100 ml | No  | ≥90 % |
| ≥270 min | <25 | ≥100 ml | Yes | ≥90 % |
| ≥270 min | ≥25 | <100 ml | Yes | ≥90 % |
| ≥270 min | <25 | <100 ml | No  | ≥90 % |
| <270 min | <25 | ≥100 ml | Yes | ≥90 % |
| <270 min | <25 | <100 ml | No  | ≥90 % |
| <270 min | <25 | <100 ml | Yes | ≥90 % |
| <270 min | <25 | <100 ml | No  | ≥90 % |
| ≥270 min | <25 | <100 ml | No  | ≥90 % |
| ≥270 min | <25 | <100 ml | No  | ≥90 % |
| <270 min | <25 | <100 ml | No  | ≥90 % |
| ≥270 min | <25 | <100 ml | No  | ≥90 % |
| ≥270 min | <25 | <100 ml | No  | <90 % |
| ≥270 min | ≥25 | ≥100 ml | No  | <90 % |
| ≥270 min | <25 | <100 ml | Yes | ≥90 % |
| <270 min | ≥25 | ≥100 ml | No  | ≥90 % |
| ≥270 min | <25 | ≥100 ml | No  | ≥90 % |
| ≥270 min | <25 | <100 ml | Yes | <90 % |
| <270 min | ≥25 | <100 ml | Yes | ≥90 % |
| ≥270 min | <25 | <100 ml | No  | ≥90 % |
| ≥270 min | <25 | <100 ml | No  | ≥90 % |

|          |     |         |     |       |
|----------|-----|---------|-----|-------|
| <270 min | <25 | ≥100 ml | Yes | <90 % |
| <270 min | <25 | ≥100 ml | Yes | <90 % |
| <270 min | <25 | ≥100 ml | No  | ≥90 % |
| <270 min | <25 | <100 ml | No  | <90 % |
| ≥270 min | <25 | ≥100 ml | No  | ≥90 % |
| ≥270 min | <25 | ≥100 ml | No  | ≥90 % |
| <270 min | <25 | <100 ml | No  | ≥90 % |
| <270 min | <25 | <100 ml | No  | ≥90 % |
| ≥270 min | <25 | <100 ml | No  | ≥90 % |
| <270 min | <25 | <100 ml | No  | ≥90 % |
| ≥270 min | <25 | <100 ml | No  | ≥90 % |
| <270 min | <25 | <100 ml | No  | ≥90 % |
| ≥270 min | ≥25 | <100 ml | Yes | ≥90 % |
| <270 min | <25 | <100 ml | No  | ≥90 % |
| <270 min | ≥25 | <100 ml | Yes | ≥90 % |
| <270 min | <25 | ≥100 ml | No  | ≥90 % |
| ≥270 min | <25 | <100 ml | Yes | <90 % |
| ≥270 min | ≥25 | ≥100 ml | Yes | ≥90 % |
| ≥270 min | <25 | ≥100 ml | Yes | ≥90 % |
| <270 min | ≥25 | <100 ml | No  | <90 % |
| <270 min | <25 | ≥100 ml | No  | ≥90 % |
| ≥270 min | <25 | ≥100 ml | No  | ≥90 % |
| <270 min | <25 | <100 ml | No  | ≥90 % |
| ≥270 min | <25 | ≥100 ml | No  | ≥90 % |
| ≥270 min | <25 | ≥100 ml | No  | <90 % |
| <270 min | <25 | <100 ml | No  | <90 % |
| ≥270 min | <25 | <100 ml | No  | ≥90 % |
| <270 min | <25 | <100 ml | No  | ≥90 % |
| ≥270 min | ≥25 | <100 ml | No  | ≥90 % |
| <270 min | <25 | <100 ml | No  | ≥90 % |
| <270 min | ≥25 | <100 ml | No  | ≥90 % |
| <270 min | ≥25 | <100 ml | No  | <90 % |
| <270 min | <25 | <100 ml | Yes | ≥90 % |
| <270 min | <25 | <100 ml | No  | ≥90 % |
| <270 min | <25 | <100 ml | No  | ≥90 % |
| <270 min | <25 | ≥100 ml | Yes | ≥90 % |
| <270 min | ≥25 | <100 ml | No  | <90 % |
| <270 min | ≥25 | ≥100 ml | Yes | ≥90 % |
| <270 min | <25 | <100 ml | No  | ≥90 % |
| <270 min | <25 | <100 ml | No  | <90 % |
| <270 min | <25 | <100 ml | No  | ≥90 % |
| <270 min | <25 | ≥100 ml | Yes | ≥90 % |
| <270 min | <25 | ≥100 ml | Yes | ≥90 % |
| ≥270 min | <25 | <100 ml | No  | ≥90 % |
| ≥270 min | <25 | ≥100 ml | No  | ≥90 % |
| ≥270 min | <25 | <100 ml | No  | ≥90 % |
| ≥270 min | <25 | <100 ml | No  | ≥90 % |
| <270 min | <25 | <100 ml | No  | ≥90 % |
| ≥270 min | <25 | <100 ml | No  | ≥90 % |
| <270 min | ≥25 | <100 ml | No  | ≥90 % |
| <270 min | <25 | ≥100 ml | Yes | <90 % |
| <270 min | <25 | ≥100 ml | Yes | ≥90 % |
| <270 min | <25 | <100 ml | Yes | <90 % |

| Abdominal drainage | T-stage | N-stage | PIN | Tumor number | Tumor size | PCT level  |
|--------------------|---------|---------|-----|--------------|------------|------------|
| Yes                | T1~T2   | N0      | Yes | <2           | ≥5 cm      | <0.05 ng/l |
| No                 | T3~T4   | N0      | No  | ≥2           | ≥5 cm      | ≥0.05 ng/l |
| Yes                | T1~T2   | N1~N3   | No  | <2           | ≥5 cm      | <0.05 ng/l |
| No                 | T3~T4   | N0      | Yes | <2           | ≥5 cm      | <0.05 ng/l |
| No                 | T3~T4   | N1~N3   | Yes | <2           | ≥5 cm      | ≥0.05 ng/l |
| No                 | T1~T2   | N1~N3   | No  | <2           | <5 cm      | <0.05 ng/l |
| Yes                | T1~T2   | N0      | Yes | ≥2           | ≥5 cm      | <0.05 ng/l |
| Yes                | T1~T2   | N0      | No  | <2           | <5 cm      | <0.05 ng/l |
| No                 | T1~T2   | N0      | Yes | <2           | ≥5 cm      | <0.05 ng/l |
| No                 | T1~T2   | N0      | No  | <2           | ≥5 cm      | ≥0.05 ng/l |
| No                 | T3~T4   | N0      | No  | <2           | ≥5 cm      | ≥0.05 ng/l |
| No                 | T3~T4   | N1~N3   | No  | <2           | <5 cm      | <0.05 ng/l |
| No                 | T3~T4   | N0      | No  | <2           | <5 cm      | <0.05 ng/l |
| Yes                | T3~T4   | N1~N3   | No  | <2           | ≥5 cm      | <0.05 ng/l |
| Yes                | T1~T2   | N1~N3   | No  | <2           | ≥5 cm      | <0.05 ng/l |
| No                 | T1~T2   | N1~N3   | No  | <2           | ≥5 cm      | <0.05 ng/l |
| Yes                | T3~T4   | N0      | No  | <2           | <5 cm      | <0.05 ng/l |
| No                 | T1~T2   | N1~N3   | No  | <2           | ≥5 cm      | <0.05 ng/l |
| No                 | T3~T4   | N1~N3   | No  | <2           | ≥5 cm      | <0.05 ng/l |
| Yes                | T1~T2   | N0      | No  | <2           | ≥5 cm      | ≥0.05 ng/l |
| No                 | T1~T2   | N1~N3   | No  | <2           | <5 cm      | <0.05 ng/l |
| No                 | T1~T2   | N0      | No  | <2           | <5 cm      | <0.05 ng/l |
| No                 | T3~T4   | N1~N3   | No  | <2           | ≥5 cm      | <0.05 ng/l |
| No                 | T3~T4   | N0      | No  | ≥2           | <5 cm      | <0.05 ng/l |
| No                 | T3~T4   | N1~N3   | No  | <2           | <5 cm      | <0.05 ng/l |
| No                 | T3~T4   | N1~N3   | No  | <2           | ≥5 cm      | ≥0.05 ng/l |
| No                 | T3~T4   | N1~N3   | No  | <2           | ≥5 cm      | <0.05 ng/l |
| Yes                | T1~T2   | N0      | No  | <2           | ≥5 cm      | <0.05 ng/l |
| Yes                | T1~T2   | N0      | No  | <2           | <5 cm      | ≥0.05 ng/l |
| No                 | T1~T2   | N1~N3   | No  | ≥2           | <5 cm      | <0.05 ng/l |
| Yes                | T1~T2   | N1~N3   | No  | <2           | ≥5 cm      | <0.05 ng/l |
| No                 | T3~T4   | N0      | No  | <2           | ≥5 cm      | <0.05 ng/l |
| No                 | T3~T4   | N0      | No  | ≥2           | <5 cm      | <0.05 ng/l |
| Yes                | T3~T4   | N1~N3   | No  | <2           | <5 cm      | <0.05 ng/l |
| Yes                | T3~T4   | N1~N3   | No  | <2           | ≥5 cm      | <0.05 ng/l |
| No                 | T3~T4   | N0      | No  | ≥2           | <5 cm      | <0.05 ng/l |
| No                 | T3~T4   | N0      | No  | <2           | ≥5 cm      | ≥0.05 ng/l |
| No                 | T3~T4   | N1~N3   | No  | <2           | ≥5 cm      | <0.05 ng/l |
| No                 | T1~T2   | N1~N3   | No  | <2           | ≥5 cm      | <0.05 ng/l |
| No                 | T3~T4   | N1~N3   | No  | <2           | ≥5 cm      | <0.05 ng/l |
| No                 | T1~T2   | N0      | No  | <2           | <5 cm      | <0.05 ng/l |
| No                 | T3~T4   | N1~N3   | Yes | <2           | ≥5 cm      | <0.05 ng/l |
| No                 | T3~T4   | N1~N3   | Yes | <2           | ≥5 cm      | <0.05 ng/l |
| No                 | T3~T4   | N0      | No  | <2           | <5 cm      | <0.05 ng/l |
| No                 | T3~T4   | N0      | No  | <2           | ≥5 cm      | <0.05 ng/l |
| No                 | T3~T4   | N1~N3   | Yes | <2           | ≥5 cm      | ≥0.05 ng/l |
| Yes                | T1~T2   | N1~N3   | No  | <2           | ≥5 cm      | ≥0.05 ng/l |
| Yes                | T1~T2   | N1~N3   | No  | <2           | ≥5 cm      | <0.05 ng/l |
| No                 | T1~T2   | N1~N3   | No  | <2           | ≥5 cm      | <0.05 ng/l |
| No                 | T1~T2   | N0      | No  | ≥2           | <5 cm      | <0.05 ng/l |
| No                 | T3~T4   | N0      | No  | ≥2           | <5 cm      | <0.05 ng/l |

|     |       |       |     |    |       |            |
|-----|-------|-------|-----|----|-------|------------|
| No  | T3~T4 | N1~N3 | No  | <2 | <5 cm | <0.05 ng/l |
| No  | T3~T4 | N1~N3 | No  | <2 | ≥5 cm | <0.05 ng/l |
| No  | T1~T2 | N1~N3 | No  | <2 | ≥5 cm | <0.05 ng/l |
| No  | T1~T2 | N1~N3 | No  | <2 | <5 cm | <0.05 ng/l |
| No  | T3~T4 | N0    | No  | <2 | <5 cm | ≥0.05 ng/l |
| No  | T3~T4 | N1~N3 | No  | <2 | ≥5 cm | ≥0.05 ng/l |
| No  | T1~T2 | N1~N3 | No  | <2 | ≥5 cm | <0.05 ng/l |
| No  | T3~T4 | N1~N3 | No  | <2 | ≥5 cm | <0.05 ng/l |
| Yes | T3~T4 | N0    | No  | <2 | ≥5 cm | <0.05 ng/l |
| No  | T3~T4 | N1~N3 | No  | <2 | ≥5 cm | <0.05 ng/l |
| No  | T1~T2 | N1~N3 | No  | <2 | <5 cm | <0.05 ng/l |
| Yes | T1~T2 | N1~N3 | No  | ≥2 | <5 cm | <0.05 ng/l |
| Yes | T3~T4 | N1~N3 | No  | <2 | <5 cm | <0.05 ng/l |
| No  | T1~T2 | N0    | No  | <2 | ≥5 cm | <0.05 ng/l |
| No  | T3~T4 | N1~N3 | No  | <2 | ≥5 cm | <0.05 ng/l |
| No  | T3~T4 | N1~N3 | No  | <2 | <5 cm | <0.05 ng/l |
| No  | T3~T4 | N0    | No  | <2 | <5 cm | ≥0.05 ng/l |
| Yes | T3~T4 | N0    | No  | <2 | ≥5 cm | ≥0.05 ng/l |
| Yes | T3~T4 | N1~N3 | No  | <2 | <5 cm | <0.05 ng/l |
| Yes | T3~T4 | N0    | No  | <2 | ≥5 cm | <0.05 ng/l |
| No  | T1~T2 | N0    | No  | ≥2 | ≥5 cm | <0.05 ng/l |
| No  | T1~T2 | N1~N3 | No  | ≥2 | ≥5 cm | <0.05 ng/l |
| Yes | T1~T2 | N0    | No  | <2 | <5 cm | <0.05 ng/l |
| Yes | T3~T4 | N1~N3 | Yes | <2 | ≥5 cm | <0.05 ng/l |
| Yes | T3~T4 | N1~N3 | No  | <2 | ≥5 cm | <0.05 ng/l |
| No  | T3~T4 | N0    | No  | <2 | <5 cm | <0.05 ng/l |
| No  | T1~T2 | N0    | No  | <2 | <5 cm | <0.05 ng/l |
| Yes | T3~T4 | N0    | No  | <2 | ≥5 cm | ≥0.05 ng/l |
| No  | T3~T4 | N1~N3 | No  | <2 | <5 cm | ≥0.05 ng/l |
| No  | T1~T2 | N1~N3 | No  | <2 | ≥5 cm | <0.05 ng/l |
| No  | T1~T2 | N1~N3 | Yes | <2 | ≥5 cm | ≥0.05 ng/l |
| No  | T3~T4 | N0    | No  | <2 | <5 cm | ≥0.05 ng/l |
| No  | T3~T4 | N1~N3 | No  | <2 | ≥5 cm | <0.05 ng/l |
| No  | T3~T4 | N1~N3 | No  | ≥2 | ≥5 cm | <0.05 ng/l |
| No  | T3~T4 | N1~N3 | No  | <2 | ≥5 cm | <0.05 ng/l |
| Yes | T1~T2 | N0    | No  | <2 | ≥5 cm | <0.05 ng/l |
| Yes | T1~T2 | N0    | No  | <2 | ≥5 cm | <0.05 ng/l |
| No  | T1~T2 | N1~N3 | No  | ≥2 | <5 cm | <0.05 ng/l |
| No  | T1~T2 | N1~N3 | No  | <2 | ≥5 cm | <0.05 ng/l |
| Yes | T3~T4 | N1~N3 | No  | <2 | <5 cm | ≥0.05 ng/l |
| Yes | T3~T4 | N0    | No  | <2 | ≥5 cm | <0.05 ng/l |
| No  | T3~T4 | N1~N3 | No  | <2 | ≥5 cm | <0.05 ng/l |
| Yes | T3~T4 | N1~N3 | No  | <2 | ≥5 cm | <0.05 ng/l |
| Yes | T3~T4 | N1~N3 | No  | <2 | ≥5 cm | <0.05 ng/l |
| Yes | T1~T2 | N1~N3 | No  | <2 | ≥5 cm | <0.05 ng/l |
| Yes | T1~T2 | N1~N3 | No  | <2 | <5 cm | <0.05 ng/l |
| Yes | T3~T4 | N1~N3 | No  | <2 | <5 cm | ≥0.05 ng/l |
| No  | T3~T4 | N0    | No  | <2 | <5 cm | <0.05 ng/l |
| No  | T3~T4 | N1~N3 | No  | <2 | <5 cm | <0.05 ng/l |
| No  | T3~T4 | N1~N3 | No  | ≥2 | ≥5 cm | ≥0.05 ng/l |
| Yes | T3~T4 | N0    | Yes | <2 | ≥5 cm | ≥0.05 ng/l |
| No  | T1~T2 | N0    | No  | <2 | <5 cm | ≥0.05 ng/l |
| No  | T1~T2 | N0    | No  | <2 | <5 cm | <0.05 ng/l |

|     |       |       |     |    |       |            |
|-----|-------|-------|-----|----|-------|------------|
| Yes | T1~T2 | N0    | Yes | <2 | ≥5 cm | <0.05 ng/l |
| No  | T3~T4 | N0    | No  | <2 | <5 cm | <0.05 ng/l |
| No  | T3~T4 | N0    | No  | <2 | <5 cm | <0.05 ng/l |
| No  | T1~T2 | N0    | Yes | <2 | ≥5 cm | <0.05 ng/l |
| No  | T1~T2 | N0    | Yes | <2 | ≥5 cm | <0.05 ng/l |
| No  | T3~T4 | N0    | No  | <2 | <5 cm | <0.05 ng/l |
| No  | T1~T2 | N0    | No  | <2 | <5 cm | <0.05 ng/l |
| No  | T3~T4 | N0    | No  | <2 | <5 cm | <0.05 ng/l |
| No  | T1~T2 | N0    | No  | <2 | <5 cm | <0.05 ng/l |
| No  | T1~T2 | N0    | No  | <2 | <5 cm | <0.05 ng/l |
| No  | T3~T4 | N1~N3 | No  | ≥2 | <5 cm | <0.05 ng/l |
| No  | T3~T4 | N1~N3 | No  | <2 | <5 cm | ≥0.05 ng/l |
| No  | T3~T4 | N1~N3 | No  | <2 | ≥5 cm | ≥0.05 ng/l |
| Yes | T1~T2 | N0    | No  | <2 | ≥5 cm | ≥0.05 ng/l |
| Yes | T1~T2 | N0    | Yes | ≥2 | ≥5 cm | ≥0.05 ng/l |
| No  | T1~T2 | N1~N3 | No  | <2 | ≥5 cm | <0.05 ng/l |
| Yes | T1~T2 | N1~N3 | No  | ≥2 | <5 cm | <0.05 ng/l |
| No  | T3~T4 | N1~N3 | No  | ≥2 | <5 cm | <0.05 ng/l |
| No  | T1~T2 | N1~N3 | No  | <2 | <5 cm | <0.05 ng/l |
| No  | T1~T2 | N1~N3 | No  | <2 | <5 cm | <0.05 ng/l |
| No  | T1~T2 | N1~N3 | No  | <2 | <5 cm | <0.05 ng/l |
| No  | T3~T4 | N1~N3 | No  | <2 | ≥5 cm | <0.05 ng/l |
| No  | T3~T4 | N0    | No  | <2 | <5 cm | <0.05 ng/l |
| No  | T1~T2 | N0    | No  | <2 | <5 cm | <0.05 ng/l |
| No  | T1~T2 | N1~N3 | No  | <2 | <5 cm | <0.05 ng/l |
| No  | T1~T2 | N0    | No  | <2 | <5 cm | <0.05 ng/l |
| No  | T1~T2 | N1~N3 | Yes | <2 | ≥5 cm | <0.05 ng/l |
| No  | T3~T4 | N1~N3 | No  | <2 | <5 cm | <0.05 ng/l |
| No  | T3~T4 | N0    | No  | <2 | <5 cm | <0.05 ng/l |
| No  | T3~T4 | N0    | Yes | <2 | ≥5 cm | ≥0.05 ng/l |
| No  | T3~T4 | N0    | Yes | <2 | ≥5 cm | <0.05 ng/l |
| No  | T3~T4 | N0    | No  | <2 | <5 cm | <0.05 ng/l |
| Yes | T3~T4 | N0    | No  | <2 | ≥5 cm | <0.05 ng/l |
| No  | T3~T4 | N0    | No  | <2 | <5 cm | <0.05 ng/l |
| Yes | T1~T2 | N0    | No  | <2 | <5 cm | <0.05 ng/l |
| Yes | T1~T2 | N0    | No  | <2 | <5 cm | <0.05 ng/l |
| No  | T1~T2 | N0    | No  | <2 | <5 cm | <0.05 ng/l |
| No  | T1~T2 | N0    | No  | <2 | <5 cm | <0.05 ng/l |
| No  | T1~T2 | N0    | No  | <2 | <5 cm | <0.05 ng/l |
| No  | T1~T2 | N0    | No  | <2 | <5 cm | <0.05 ng/l |
| No  | T1~T2 | N0    | No  | ≥2 | <5 cm | <0.05 ng/l |
| No  | T3~T4 | N0    | No  | ≥2 | <5 cm | <0.05 ng/l |
| No  | T3~T4 | N0    | No  | <2 | <5 cm | <0.05 ng/l |
| No  | T3~T4 | N1~N3 | No  | <2 | <5 cm | <0.05 ng/l |
| No  | T1~T2 | N0    | Yes | <2 | <5 cm | <0.05 ng/l |
| No  | T1~T2 | N0    | No  | <2 | <5 cm | <0.05 ng/l |
| No  | T1~T2 | N0    | No  | <2 | ≥5 cm | <0.05 ng/l |
| No  | T1~T2 | N0    | No  | <2 | ≥5 cm | <0.05 ng/l |
| No  | T3~T4 | N0    | No  | <2 | <5 cm | <0.05 ng/l |
| No  | T1~T2 | N0    | No  | <2 | <5 cm | <0.05 ng/l |
| No  | T1~T2 | N0    | No  | <2 | <5 cm | <0.05 ng/l |
| No  | T3~T4 | N0    | No  | <2 | <5 cm | <0.05 ng/l |
| No  | T1~T2 | N0    | No  | <2 | <5 cm | <0.05 ng/l |
| No  | T1~T2 | N0    | No  | <2 | <5 cm | <0.05 ng/l |

|     |       |       |     |    |       |            |
|-----|-------|-------|-----|----|-------|------------|
| Yes | T1~T2 | N0    | No  | <2 | <5 cm | <0.05 ng/l |
| No  | T1~T2 | N0    | No  | <2 | <5 cm | <0.05 ng/l |
| No  | T1~T2 | N1~N3 | No  | <2 | <5 cm | <0.05 ng/l |
| Yes | T1~T2 | N1~N3 | No  | <2 | ≥5 cm | <0.05 ng/l |
| Yes | T1~T2 | N0    | No  | <2 | <5 cm | <0.05 ng/l |
| No  | T1~T2 | N0    | No  | <2 | ≥5 cm | <0.05 ng/l |
| No  | T1~T2 | N0    | No  | <2 | <5 cm | <0.05 ng/l |
| No  | T3~T4 | N0    | No  | <2 | <5 cm | <0.05 ng/l |
| No  | T3~T4 | N0    | No  | <2 | <5 cm | <0.05 ng/l |
| No  | T1~T2 | N0    | No  | <2 | <5 cm | <0.05 ng/l |
| No  | T1~T2 | N1~N3 | No  | <2 | <5 cm | <0.05 ng/l |
| No  | T1~T2 | N0    | No  | <2 | <5 cm | <0.05 ng/l |
| No  | T1~T2 | N0    | No  | <2 | <5 cm | <0.05 ng/l |
| No  | T1~T2 | N0    | No  | ≥2 | ≥5 cm | <0.05 ng/l |
| No  | T1~T2 | N0    | No  | <2 | ≥5 cm | <0.05 ng/l |
| No  | T1~T2 | N0    | Yes | <2 | <5 cm | <0.05 ng/l |
| No  | T1~T2 | N0    | Yes | <2 | ≥5 cm | <0.05 ng/l |
| No  | T1~T2 | N0    | Yes | <2 | <5 cm | <0.05 ng/l |
| No  | T1~T2 | N0    | Yes | <2 | <5 cm | <0.05 ng/l |
| No  | T1~T2 | N0    | Yes | <2 | <5 cm | <0.05 ng/l |
| Yes | T1~T2 | N0    | No  | <2 | <5 cm | <0.05 ng/l |
| Yes | T1~T2 | N0    | No  | <2 | <5 cm | <0.05 ng/l |
| No  | T1~T2 | N1~N3 | No  | <2 | <5 cm | <0.05 ng/l |
| No  | T1~T2 | N0    | No  | <2 | <5 cm | <0.05 ng/l |
| No  | T3~T4 | N0    | No  | <2 | ≥5 cm | <0.05 ng/l |
| No  | T3~T4 | N0    | No  | <2 | ≥5 cm | ≥0.05 ng/l |
| No  | T3~T4 | N0    | No  | <2 | <5 cm | <0.05 ng/l |
| No  | T3~T4 | N1~N3 | No  | <2 | ≥5 cm | ≥0.05 ng/l |
| No  | T3~T4 | N0    | No  | <2 | <5 cm | ≥0.05 ng/l |
| No  | T3~T4 | N0    | No  | <2 | <5 cm | ≥0.05 ng/l |
| No  | T3~T4 | N0    | No  | <2 | ≥5 cm | <0.05 ng/l |
| No  | T1~T2 | N0    | No  | <2 | <5 cm | <0.05 ng/l |
| No  | T1~T2 | N0    | No  | <2 | <5 cm | <0.05 ng/l |
| No  | T3~T4 | N0    | No  | ≥2 | <5 cm | <0.05 ng/l |
| Yes | T3~T4 | N0    | No  | <2 | ≥5 cm | <0.05 ng/l |
| Yes | T3~T4 | N0    | No  | <2 | <5 cm | <0.05 ng/l |
| No  | T1~T2 | N0    | No  | <2 | <5 cm | <0.05 ng/l |
| No  | T1~T2 | N0    | No  | ≥2 | <5 cm | <0.05 ng/l |
| No  | T1~T2 | N0    | No  | ≥2 | <5 cm | <0.05 ng/l |
| No  | T1~T2 | N1~N3 | No  | <2 | <5 cm | <0.05 ng/l |
| No  | T1~T2 | N0    | No  | <2 | <5 cm | <0.05 ng/l |
| No  | T1~T2 | N0    | Yes | <2 | <5 cm | <0.05 ng/l |
| No  | T3~T4 | N0    | Yes | <2 | <5 cm | <0.05 ng/l |
| No  | T3~T4 | N0    | Yes | <2 | <5 cm | <0.05 ng/l |
| No  | T3~T4 | N1~N3 | No  | <2 | <5 cm | <0.05 ng/l |
| No  | T1~T2 | N0    | No  | <2 | ≥5 cm | <0.05 ng/l |
| No  | T1~T2 | N0    | No  | <2 | <5 cm | <0.05 ng/l |
| No  | T1~T2 | N0    | Yes | <2 | ≥5 cm | <0.05 ng/l |
| No  | T1~T2 | N0    | Yes | <2 | <5 cm | <0.05 ng/l |
| No  | T3~T4 | N0    | No  | <2 | <5 cm | ≥0.05 ng/l |
| No  | T1~T2 | N0    | No  | <2 | <5 cm | <0.05 ng/l |
| Yes | T3~T4 | N0    | No  | <2 | ≥5 cm | ≥0.05 ng/l |
| No  | T3~T4 | N0    | No  | <2 | <5 cm | <0.05 ng/l |
| Yes | T1~T2 | N0    | No  | <2 | <5 cm | ≥0.05 ng/l |

|     |       |       |     |    |       |            |
|-----|-------|-------|-----|----|-------|------------|
| No  | T1~T2 | N0    | No  | <2 | <5 cm | ≥0.05 ng/l |
| No  | T1~T2 | N0    | No  | <2 | <5 cm | <0.05 ng/l |
| No  | T1~T2 | N1~N3 | No  | <2 | <5 cm | <0.05 ng/l |
| No  | T1~T2 | N1~N3 | No  | ≥2 | <5 cm | <0.05 ng/l |
| No  | T1~T2 | N0    | No  | <2 | <5 cm | <0.05 ng/l |
| No  | T1~T2 | N0    | No  | <2 | <5 cm | <0.05 ng/l |
| No  | T1~T2 | N0    | No  | <2 | ≥5 cm | <0.05 ng/l |
| Yes | T1~T2 | N0    | No  | ≥2 | ≥5 cm | <0.05 ng/l |
| No  | T3~T4 | N0    | No  | ≥2 | <5 cm | <0.05 ng/l |
| No  | T3~T4 | N0    | No  | <2 | ≥5 cm | <0.05 ng/l |
| No  | T1~T2 | N1~N3 | No  | <2 | <5 cm | <0.05 ng/l |
| No  | T1~T2 | N0    | No  | <2 | <5 cm | <0.05 ng/l |
| No  | T3~T4 | N0    | No  | <2 | <5 cm | <0.05 ng/l |
| No  | T3~T4 | N0    | No  | <2 | <5 cm | <0.05 ng/l |
| No  | T3~T4 | N0    | Yes | <2 | ≥5 cm | <0.05 ng/l |
| No  | T3~T4 | N0    | No  | <2 | <5 cm | <0.05 ng/l |
| No  | T3~T4 | N0    | Yes | <2 | <5 cm | <0.05 ng/l |
| No  | T1~T2 | N0    | No  | <2 | <5 cm | <0.05 ng/l |
| No  | T1~T2 | N0    | No  | <2 | <5 cm | <0.05 ng/l |
| No  | T1~T2 | N0    | No  | <2 | <5 cm | <0.05 ng/l |
| Yes | T1~T2 | N0    | Yes | <2 | <5 cm | <0.05 ng/l |
| Yes | T1~T2 | N0    | No  | <2 | <5 cm | ≥0.05 ng/l |
| Yes | T1~T2 | N1~N3 | Yes | <2 | <5 cm | ≥0.05 ng/l |
| No  | T3~T4 | N0    | No  | <2 | <5 cm | <0.05 ng/l |
| No  | T3~T4 | N0    | No  | <2 | <5 cm | <0.05 ng/l |
| No  | T1~T2 | N0    | No  | <2 | <5 cm | ≥0.05 ng/l |
| No  | T1~T2 | N0    | No  | <2 | <5 cm | <0.05 ng/l |
| No  | T1~T2 | N1~N3 | No  | <2 | <5 cm | <0.05 ng/l |
| No  | T1~T2 | N0    | No  | <2 | <5 cm | <0.05 ng/l |
| No  | T1~T2 | N0    | No  | <2 | <5 cm | <0.05 ng/l |
| No  | T1~T2 | N0    | No  | <2 | <5 cm | <0.05 ng/l |
| No  | T1~T2 | N0    | No  | <2 | <5 cm | <0.05 ng/l |
| No  | T1~T2 | N0    | No  | ≥2 | <5 cm | <0.05 ng/l |
| No  | T3~T4 | N0    | No  | ≥2 | <5 cm | <0.05 ng/l |
| No  | T3~T4 | N0    | No  | <2 | ≥5 cm | <0.05 ng/l |
| No  | T1~T2 | N0    | No  | <2 | ≥5 cm | <0.05 ng/l |
| No  | T3~T4 | N0    | Yes | ≥2 | <5 cm | <0.05 ng/l |
| No  | T3~T4 | N0    | Yes | <2 | ≥5 cm | <0.05 ng/l |
| No  | T3~T4 | N0    | Yes | <2 | <5 cm | <0.05 ng/l |
| Yes | T3~T4 | N0    | Yes | <2 | <5 cm | <0.05 ng/l |
| No  | T3~T4 | N1~N3 | No  | <2 | <5 cm | <0.05 ng/l |
| Yes | T3~T4 | N0    | No  | <2 | <5 cm | <0.05 ng/l |
| No  | T3~T4 | N0    | No  | <2 | <5 cm | <0.05 ng/l |
| Yes | T3~T4 | N0    | No  | <2 | <5 cm | ≥0.05 ng/l |
| No  | T1~T2 | N0    | No  | <2 | <5 cm | <0.05 ng/l |
| No  | T3~T4 | N0    | No  | <2 | <5 cm | ≥0.05 ng/l |
| No  | T3~T4 | N0    | Yes | <2 | ≥5 cm | <0.05 ng/l |
| No  | T1~T2 | N0    | No  | <2 | <5 cm | <0.05 ng/l |
| No  | T1~T2 | N0    | No  | <2 | <5 cm | <0.05 ng/l |
| No  | T1~T2 | N0    | No  | <2 | <5 cm | <0.05 ng/l |
| No  | T1~T2 | N0    | No  | <2 | <5 cm | <0.05 ng/l |
| No  | T1~T2 | N1~N3 | No  | <2 | <5 cm | <0.05 ng/l |
| No  | T1~T2 | N0    | No  | <2 | <5 cm | <0.05 ng/l |
| No  | T3~T4 | N0    | No  | <2 | <5 cm | <0.05 ng/l |



|     |       |       |     |          |             |                  |
|-----|-------|-------|-----|----------|-------------|------------------|
| No  | T3~T4 | N0    | No  | $\geq 2$ | $\geq 5$ cm | $< 0.05$ ng/l    |
| No  | T1~T2 | N0    | No  | $\geq 2$ | $\geq 5$ cm | $< 0.05$ ng/l    |
| No  | T1~T2 | N0    | No  | $< 2$    | $< 5$ cm    | $< 0.05$ ng/l    |
| No  | T1~T2 | N0    | No  | $< 2$    | $\geq 5$ cm | $< 0.05$ ng/l    |
| No  | T1~T2 | N0    | No  | $< 2$    | $< 5$ cm    | $< 0.05$ ng/l    |
| No  | T1~T2 | N0    | No  | $\geq 2$ | $< 5$ cm    | $< 0.05$ ng/l    |
| No  | T1~T2 | N0    | No  | $< 2$    | $< 5$ cm    | $< 0.05$ ng/l    |
| No  | T1~T2 | N0    | No  | $< 2$    | $< 5$ cm    | $< 0.05$ ng/l    |
| Yes | T3~T4 | N0    | No  | $< 2$    | $< 5$ cm    | $< 0.05$ ng/l    |
| No  | T1~T2 | N1~N3 | No  | $< 2$    | $< 5$ cm    | $< 0.05$ ng/l    |
| Yes | T1~T2 | N1~N3 | No  | $< 2$    | $< 5$ cm    | $< 0.05$ ng/l    |
| No  | T1~T2 | N0    | No  | $< 2$    | $\geq 5$ cm | $< 0.05$ ng/l    |
| Yes | T3~T4 | N0    | No  | $< 2$    | $\geq 5$ cm | $< 0.05$ ng/l    |
| No  | T3~T4 | N0    | No  | $< 2$    | $< 5$ cm    | $\geq 0.05$ ng/l |
| No  | T3~T4 | N0    | No  | $< 2$    | $\geq 5$ cm | $< 0.05$ ng/l    |
| No  | T3~T4 | N0    | No  | $< 2$    | $< 5$ cm    | $< 0.05$ ng/l    |
| No  | T1~T2 | N0    | No  | $< 2$    | $< 5$ cm    | $\geq 0.05$ ng/l |
| No  | T1~T2 | N1~N3 | No  | $< 2$    | $< 5$ cm    | $\geq 0.05$ ng/l |
| No  | T1~T2 | N0    | No  | $< 2$    | $< 5$ cm    | $< 0.05$ ng/l    |
| No  | T1~T2 | N0    | No  | $< 2$    | $< 5$ cm    | $\geq 0.05$ ng/l |
| No  | T1~T2 | N0    | No  | $< 2$    | $< 5$ cm    | $< 0.05$ ng/l    |
| No  | T3~T4 | N0    | No  | $\geq 2$ | $< 5$ cm    | $< 0.05$ ng/l    |
| No  | T3~T4 | N0    | Yes | $< 2$    | $< 5$ cm    | $< 0.05$ ng/l    |
| No  | T1~T2 | N0    | Yes | $< 2$    | $< 5$ cm    | $< 0.05$ ng/l    |
| No  | T1~T2 | N0    | Yes | $< 2$    | $\geq 5$ cm | $< 0.05$ ng/l    |
| No  | T1~T2 | N0    | Yes | $\geq 2$ | $\geq 5$ cm | $< 0.05$ ng/l    |
| No  | T1~T2 | N0    | No  | $< 2$    | $< 5$ cm    | $< 0.05$ ng/l    |
| No  | T1~T2 | N0    | No  | $< 2$    | $\geq 5$ cm | $< 0.05$ ng/l    |
| Yes | T1~T2 | N0    | No  | $< 2$    | $< 5$ cm    | $< 0.05$ ng/l    |
| No  | T1~T2 | N0    | No  | $< 2$    | $< 5$ cm    | $< 0.05$ ng/l    |
| Yes | T3~T4 | N0    | No  | $< 2$    | $< 5$ cm    | $< 0.05$ ng/l    |
| Yes | T1~T2 | N0    | No  | $< 2$    | $< 5$ cm    | $< 0.05$ ng/l    |
| No  | T1~T2 | N1~N3 | No  | $< 2$    | $< 5$ cm    | $< 0.05$ ng/l    |
| No  | T1~T2 | N0    | No  | $< 2$    | $< 5$ cm    | $< 0.05$ ng/l    |
| No  | T1~T2 | N0    | No  | $< 2$    | $< 5$ cm    | $\geq 0.05$ ng/l |
| No  | T1~T2 | N0    | No  | $< 2$    | $< 5$ cm    | $\geq 0.05$ ng/l |
| No  | T1~T2 | N0    | No  | $< 2$    | $< 5$ cm    | $< 0.05$ ng/l    |
| No  | T1~T2 | N0    | No  | $< 2$    | $< 5$ cm    | $< 0.05$ ng/l    |
| No  | T1~T2 | N0    | No  | $< 2$    | $< 5$ cm    | $< 0.05$ ng/l    |
| No  | T1~T2 | N0    | No  | $< 2$    | $< 5$ cm    | $< 0.05$ ng/l    |
| No  | T1~T2 | N0    | No  | $< 2$    | $< 5$ cm    | $< 0.05$ ng/l    |
| No  | T1~T2 | N0    | No  | $< 2$    | $< 5$ cm    | $< 0.05$ ng/l    |
| No  | T1~T2 | N0    | No  | $\geq 2$ | $< 5$ cm    | $< 0.05$ ng/l    |
| No  | T1~T2 | N0    | No  | $< 2$    | $< 5$ cm    | $< 0.05$ ng/l    |
| No  | T3~T4 | N1~N3 | No  | $< 2$    | $\geq 5$ cm | $< 0.05$ ng/l    |
| No  | T1~T2 | N1~N3 | No  | $\geq 2$ | $\geq 5$ cm | $< 0.05$ ng/l    |
| No  | T1~T2 | N0    | No  | $< 2$    | $< 5$ cm    | $< 0.05$ ng/l    |
| No  | T1~T2 | N0    | Yes | $< 2$    | $\geq 5$ cm | $< 0.05$ ng/l    |
| No  | T1~T2 | N0    | No  | $\geq 2$ | $< 5$ cm    | $< 0.05$ ng/l    |
| No  | T1~T2 | N0    | No  | $< 2$    | $< 5$ cm    | $\geq 0.05$ ng/l |
| No  | T3~T4 | N1~N3 | No  | $< 2$    | $< 5$ cm    | $\geq 0.05$ ng/l |
| No  | T3~T4 | N0    | No  | $< 2$    | $< 5$ cm    | $< 0.05$ ng/l    |
| No  | T3~T4 | N0    | No  | $< 2$    | $< 5$ cm    | $\geq 0.05$ ng/l |
| No  | T3~T4 | N0    | Yes | $< 2$    | $\geq 5$ cm | $< 0.05$ ng/l    |

|     |       |       |     |    |       |            |
|-----|-------|-------|-----|----|-------|------------|
| No  | T3~T4 | N0    | No  | <2 | <5 cm | <0.05 ng/l |
| No  | T1~T2 | N0    | No  | <2 | <5 cm | ≥0.05 ng/l |
| Yes | T1~T2 | N0    | No  | <2 | <5 cm | ≥0.05 ng/l |
| Yes | T1~T2 | N0    | No  | <2 | <5 cm | <0.05 ng/l |
| Yes | T1~T2 | N0    | No  | <2 | <5 cm | <0.05 ng/l |
| No  | T1~T2 | N0    | No  | <2 | <5 cm | <0.05 ng/l |
| No  | T3~T4 | N0    | No  | <2 | <5 cm | <0.05 ng/l |
| No  | T1~T2 | N0    | No  | ≥2 | ≥5 cm | <0.05 ng/l |
| No  | T1~T2 | N1~N3 | No  | <2 | ≥5 cm | <0.05 ng/l |
| No  | T3~T4 | N1~N3 | No  | ≥2 | ≥5 cm | <0.05 ng/l |
| No  | T1~T2 | N0    | No  | <2 | <5 cm | <0.05 ng/l |
| No  | T1~T2 | N0    | No  | <2 | <5 cm | <0.05 ng/l |
| No  | T1~T2 | N0    | No  | ≥2 | <5 cm | ≥0.05 ng/l |
| No  | T1~T2 | N0    | No  | ≥2 | <5 cm | ≥0.05 ng/l |
| No  | T3~T4 | N0    | No  | <2 | <5 cm | <0.05 ng/l |
| No  | T1~T2 | N0    | No  | <2 | <5 cm | <0.05 ng/l |
| Yes | T1~T2 | N1~N3 | No  | ≥2 | ≥5 cm | <0.05 ng/l |
| Yes | T3~T4 | N0    | No  | ≥2 | <5 cm | <0.05 ng/l |
| No  | T1~T2 | N0    | No  | ≥2 | <5 cm | <0.05 ng/l |
| No  | T1~T2 | N0    | No  | <2 | <5 cm | <0.05 ng/l |
| No  | T3~T4 | N0    | No  | <2 | <5 cm | <0.05 ng/l |
| No  | T3~T4 | N0    | No  | <2 | <5 cm | <0.05 ng/l |
| No  | T3~T4 | N0    | Yes | <2 | <5 cm | ≥0.05 ng/l |
| No  | T1~T2 | N0    | Yes | <2 | <5 cm | ≥0.05 ng/l |
| No  | T3~T4 | N0    | No  | <2 | <5 cm | <0.05 ng/l |
| No  | T1~T2 | N0    | No  | <2 | ≥5 cm | <0.05 ng/l |
| No  | T1~T2 | N0    | No  | <2 | ≥5 cm | <0.05 ng/l |
| No  | T1~T2 | N0    | No  | <2 | <5 cm | <0.05 ng/l |
| No  | T1~T2 | N1~N3 | No  | <2 | ≥5 cm | <0.05 ng/l |
| No  | T1~T2 | N0    | No  | <2 | <5 cm | ≥0.05 ng/l |
| No  | T1~T2 | N0    | No  | <2 | <5 cm | <0.05 ng/l |
| Yes | T1~T2 | N0    | No  | <2 | <5 cm | <0.05 ng/l |
| No  | T1~T2 | N0    | No  | <2 | <5 cm | <0.05 ng/l |
| No  | T1~T2 | N1~N3 | No  | <2 | <5 cm | <0.05 ng/l |
| Yes | T1~T2 | N0    | No  | ≥2 | <5 cm | <0.05 ng/l |
| Yes | T1~T2 | N1~N3 | No  | ≥2 | ≥5 cm | <0.05 ng/l |
| No  | T1~T2 | N1~N3 | No  | <2 | ≥5 cm | <0.05 ng/l |
| No  | T1~T2 | N0    | No  | <2 | <5 cm | ≥0.05 ng/l |
| No  | T1~T2 | N1~N3 | No  | <2 | ≥5 cm | ≥0.05 ng/l |
| No  | T3~T4 | N0    | No  | ≥2 | <5 cm | <0.05 ng/l |
| No  | T1~T2 | N0    | No  | <2 | <5 cm | ≥0.05 ng/l |
| No  | T1~T2 | N0    | No  | <2 | <5 cm | <0.05 ng/l |
| No  | T3~T4 | N0    | No  | ≥2 | <5 cm | <0.05 ng/l |
| No  | T1~T2 | N1~N3 | Yes | <2 | <5 cm | ≥0.05 ng/l |
| No  | T3~T4 | N0    | No  | ≥2 | <5 cm | <0.05 ng/l |
| No  | T1~T2 | N0    | No  | ≥2 | <5 cm | <0.05 ng/l |
| No  | T1~T2 | N0    | No  | <2 | <5 cm | <0.05 ng/l |
| No  | T3~T4 | N0    | No  | <2 | ≥5 cm | <0.05 ng/l |
| No  | T3~T4 | N1~N3 | No  | <2 | ≥5 cm | <0.05 ng/l |
| No  | T3~T4 | N0    | No  | <2 | <5 cm | <0.05 ng/l |
| No  | T1~T2 | N0    | No  | <2 | ≥5 cm | <0.05 ng/l |
| No  | T3~T4 | N0    | No  | <2 | ≥5 cm | <0.05 ng/l |
| No  | T1~T2 | N0    | No  | <2 | <5 cm | <0.05 ng/l |

|     |       |       |     |    |       |            |
|-----|-------|-------|-----|----|-------|------------|
| No  | T1~T2 | N0    | No  | <2 | ≥5 cm | <0.05 ng/l |
| Yes | T1~T2 | N0    | No  | <2 | <5 cm | <0.05 ng/l |
| No  | T1~T2 | N0    | No  | <2 | <5 cm | <0.05 ng/l |
| Yes | T1~T2 | N1~N3 | No  | <2 | <5 cm | <0.05 ng/l |
| No  | T1~T2 | N1~N3 | No  | <2 | <5 cm | <0.05 ng/l |
| No  | T1~T2 | N0    | No  | <2 | <5 cm | <0.05 ng/l |
| No  | T1~T2 | N0    | No  | <2 | <5 cm | ≥0.05 ng/l |
| No  | T1~T2 | N0    | No  | <2 | <5 cm | <0.05 ng/l |
| No  | T1~T2 | N0    | No  | ≥2 | <5 cm | ≥0.05 ng/l |
| No  | T1~T2 | N0    | No  | <2 | <5 cm | <0.05 ng/l |
| No  | T1~T2 | N0    | Yes | ≥2 | ≥5 cm | ≥0.05 ng/l |
| No  | T1~T2 | N1~N3 | Yes | ≥2 | ≥5 cm | <0.05 ng/l |
| No  | T1~T2 | N0    | No  | ≥2 | <5 cm | <0.05 ng/l |
| No  | T1~T2 | N1~N3 | No  | ≥2 | ≥5 cm | <0.05 ng/l |
| No  | T1~T2 | N0    | No  | <2 | ≥5 cm | <0.05 ng/l |
| No  | T1~T2 | N0    | No  | <2 | <5 cm | <0.05 ng/l |
| Yes | T1~T2 | N0    | No  | <2 | ≥5 cm | <0.05 ng/l |
| Yes | T1~T2 | N0    | No  | <2 | <5 cm | <0.05 ng/l |
| Yes | T1~T2 | N0    | No  | <2 | <5 cm | <0.05 ng/l |
| No  | T1~T2 | N1~N3 | No  | <2 | <5 cm | <0.05 ng/l |
| No  | T1~T2 | N0    | No  | <2 | <5 cm | <0.05 ng/l |
| No  | T1~T2 | N1~N3 | No  | <2 | <5 cm | <0.05 ng/l |
| No  | T1~T2 | N1~N3 | No  | <2 | <5 cm | <0.05 ng/l |
| Yes | T3~T4 | N0    | No  | <2 | <5 cm | <0.05 ng/l |
| No  | T1~T2 | N1~N3 | No  | <2 | <5 cm | <0.05 ng/l |
| No  | T3~T4 | N0    | No  | <2 | <5 cm | <0.05 ng/l |
| No  | T3~T4 | N0    | No  | <2 | <5 cm | <0.05 ng/l |
| No  | T1~T2 | N0    | No  | <2 | <5 cm | ≥0.05 ng/l |
| No  | T1~T2 | N0    | No  | <2 | ≥5 cm | <0.05 ng/l |
| No  | T1~T2 | N1~N3 | No  | ≥2 | ≥5 cm | ≥0.05 ng/l |
| No  | T1~T2 | N0    | No  | ≥2 | <5 cm | <0.05 ng/l |
| No  | T3~T4 | N0    | No  | ≥2 | ≥5 cm | <0.05 ng/l |
| No  | T1~T2 | N0    | No  | <2 | ≥5 cm | ≥0.05 ng/l |
| No  | T3~T4 | N0    | No  | <2 | <5 cm | <0.05 ng/l |
| No  | T1~T2 | N1~N3 | Yes | <2 | ≥5 cm | <0.05 ng/l |
| No  | T1~T2 | N0    | No  | <2 | <5 cm | <0.05 ng/l |
| No  | T3~T4 | N0    | No  | <2 | <5 cm | <0.05 ng/l |
| Yes | T1~T2 | N0    | Yes | <2 | <5 cm | <0.05 ng/l |
| Yes | T1~T2 | N1~N3 | No  | <2 | ≥5 cm | <0.05 ng/l |
| Yes | T3~T4 | N1~N3 | No  | <2 | ≥5 cm | <0.05 ng/l |
| No  | T1~T2 | N0    | Yes | <2 | <5 cm | <0.05 ng/l |
| No  | T3~T4 | N1~N3 | No  | <2 | ≥5 cm | ≥0.05 ng/l |
| Yes | T1~T2 | N0    | No  | <2 | <5 cm | ≥0.05 ng/l |
| No  | T1~T2 | N0    | No  | <2 | <5 cm | ≥0.05 ng/l |
| No  | T1~T2 | N0    | No  | <2 | <5 cm | <0.05 ng/l |
| No  | T1~T2 | N0    | No  | ≥2 | <5 cm | ≥0.05 ng/l |
| No  | T1~T2 | N1~N3 | No  | <2 | <5 cm | ≥0.05 ng/l |
| No  | T1~T2 | N0    | No  | ≥2 | <5 cm | ≥0.05 ng/l |
| No  | T1~T2 | N0    | No  | ≥2 | <5 cm | <0.05 ng/l |
| No  | T1~T2 | N0    | No  | <2 | <5 cm | <0.05 ng/l |
| No  | T1~T2 | N0    | No  | <2 | <5 cm | <0.05 ng/l |
| No  | T3~T4 | N1~N3 | No  | <2 | <5 cm | <0.05 ng/l |
| No  | T3~T4 | N0    | No  | <2 | <5 cm | <0.05 ng/l |
| No  | T3~T4 | N0    | No  | <2 | ≥5 cm | <0.05 ng/l |

|     |       |       |     |    |       |            |
|-----|-------|-------|-----|----|-------|------------|
| No  | T1~T2 | N0    | No  | <2 | <5 cm | <0.05 ng/l |
| No  | T1~T2 | N0    | No  | <2 | <5 cm | <0.05 ng/l |
| No  | T1~T2 | N0    | No  | <2 | <5 cm | <0.05 ng/l |
| No  | T1~T2 | N0    | No  | <2 | ≥5 cm | <0.05 ng/l |
| No  | T1~T2 | N0    | Yes | <2 | ≥5 cm | <0.05 ng/l |
| No  | T1~T2 | N1~N3 | No  | <2 | <5 cm | <0.05 ng/l |
| No  | T1~T2 | N1~N3 | Yes | <2 | <5 cm | ≥0.05 ng/l |
| Yes | T1~T2 | N0    | Yes | <2 | <5 cm | <0.05 ng/l |
| Yes | T1~T2 | N0    | No  | <2 | <5 cm | <0.05 ng/l |
| No  | T1~T2 | N0    | No  | <2 | <5 cm | ≥0.05 ng/l |
| No  | T1~T2 | N0    | No  | <2 | <5 cm | <0.05 ng/l |
| Yes | T3~T4 | N0    | No  | <2 | <5 cm | <0.05 ng/l |
| Yes | T1~T2 | N0    | No  | <2 | <5 cm | <0.05 ng/l |
| No  | T3~T4 | N1~N3 | No  | <2 | <5 cm | <0.05 ng/l |
| No  | T1~T2 | N0    | No  | ≥2 | <5 cm | <0.05 ng/l |
| No  | T1~T2 | N1~N3 | No  | ≥2 | <5 cm | <0.05 ng/l |
| No  | T1~T2 | N0    | No  | ≥2 | <5 cm | <0.05 ng/l |
| No  | T1~T2 | N0    | No  | <2 | <5 cm | <0.05 ng/l |
| No  | T1~T2 | N0    | No  | <2 | <5 cm | <0.05 ng/l |
| No  | T1~T2 | N0    | No  | <2 | <5 cm | <0.05 ng/l |
| No  | T1~T2 | N1~N3 | No  | <2 | ≥5 cm | <0.05 ng/l |
| No  | T1~T2 | N1~N3 | No  | <2 | ≥5 cm | <0.05 ng/l |
| No  | T1~T2 | N0    | No  | <2 | <5 cm | <0.05 ng/l |
| No  | T1~T2 | N1~N3 | No  | <2 | ≥5 cm | <0.05 ng/l |
| No  | T1~T2 | N0    | Yes | <2 | ≥5 cm | <0.05 ng/l |
| Yes | T3~T4 | N0    | No  | <2 | <5 cm | <0.05 ng/l |
| No  | T1~T2 | N0    | Yes | <2 | ≥5 cm | ≥0.05 ng/l |
| No  | T3~T4 | N0    | No  | <2 | <5 cm | <0.05 ng/l |
| No  | T3~T4 | N1~N3 | No  | <2 | <5 cm | <0.05 ng/l |
| No  | T3~T4 | N0    | No  | <2 | <5 cm | <0.05 ng/l |
| Yes | T1~T2 | N0    | No  | ≥2 | <5 cm | <0.05 ng/l |
| Yes | T1~T2 | N0    | No  | ≥2 | <5 cm | <0.05 ng/l |
| Yes | T1~T2 | N0    | No  | <2 | <5 cm | <0.05 ng/l |
| No  | T1~T2 | N1~N3 | No  | ≥2 | <5 cm | <0.05 ng/l |
| No  | T1~T2 | N0    | Yes | ≥2 | ≥5 cm | <0.05 ng/l |
| No  | T1~T2 | N0    | No  | <2 | <5 cm | <0.05 ng/l |
| No  | T1~T2 | N0    | Yes | <2 | ≥5 cm | <0.05 ng/l |
| No  | T1~T2 | N0    | Yes | <2 | <5 cm | <0.05 ng/l |
| No  | T1~T2 | N0    | No  | <2 | <5 cm | <0.05 ng/l |
| No  | T1~T2 | N0    | No  | <2 | <5 cm | <0.05 ng/l |
| No  | T3~T4 | N1~N3 | No  | <2 | ≥5 cm | <0.05 ng/l |
| No  | T3~T4 | N1~N3 | No  | <2 | ≥5 cm | ≥0.05 ng/l |
| No  | T3~T4 | N0    | No  | <2 | <5 cm | <0.05 ng/l |
| Yes | T1~T2 | N0    | No  | <2 | ≥5 cm | <0.05 ng/l |
| No  | T1~T2 | N0    | No  | <2 | <5 cm | <0.05 ng/l |
| No  | T1~T2 | N0    | Yes | <2 | <5 cm | ≥0.05 ng/l |
| Yes | T1~T2 | N0    | Yes | <2 | <5 cm | <0.05 ng/l |
| Yes | T1~T2 | N0    | No  | ≥2 | <5 cm | <0.05 ng/l |
| Yes | T1~T2 | N1~N3 | No  | ≥2 | ≥5 cm | <0.05 ng/l |
| No  | T1~T2 | N0    | No  | <2 | <5 cm | <0.05 ng/l |
| Yes | T1~T2 | N1~N3 | No  | <2 | <5 cm | <0.05 ng/l |
| No  | T1~T2 | N0    | No  | <2 | <5 cm | <0.05 ng/l |
| No  | T3~T4 | N0    | No  | <2 | <5 cm | <0.05 ng/l |

|     |       |       |     |    |       |            |
|-----|-------|-------|-----|----|-------|------------|
| No  | T3~T4 | N0    | No  | <2 | <5 cm | <0.05 ng/l |
| No  | T1~T2 | N0    | No  | <2 | <5 cm | <0.05 ng/l |
| No  | T1~T2 | N0    | No  | <2 | <5 cm | <0.05 ng/l |
| No  | T1~T2 | N0    | No  | <2 | <5 cm | <0.05 ng/l |
| No  | T1~T2 | N0    | No  | ≥2 | <5 cm | <0.05 ng/l |
| No  | T1~T2 | N0    | No  | ≥2 | <5 cm | <0.05 ng/l |
| No  | T3~T4 | N1~N3 | No  | <2 | <5 cm | <0.05 ng/l |
| No  | T3~T4 | N1~N3 | No  | <2 | <5 cm | <0.05 ng/l |
| No  | T3~T4 | N0    | No  | <2 | <5 cm | <0.05 ng/l |
| No  | T1~T2 | N1~N3 | No  | <2 | <5 cm | <0.05 ng/l |
| No  | T1~T2 | N0    | No  | <2 | <5 cm | ≥0.05 ng/l |
| No  | T1~T2 | N0    | No  | <2 | <5 cm | <0.05 ng/l |
| No  | T1~T2 | N0    | No  | <2 | ≥5 cm | <0.05 ng/l |
| No  | T1~T2 | N0    | No  | <2 | ≥5 cm | <0.05 ng/l |
| Yes | T3~T4 | N1~N3 | No  | <2 | <5 cm | <0.05 ng/l |
| No  | T1~T2 | N0    | No  | ≥2 | <5 cm | ≥0.05 ng/l |
| Yes | T1~T2 | N0    | No  | ≥2 | <5 cm | ≥0.05 ng/l |
| Yes | T1~T2 | N0    | No  | <2 | <5 cm | <0.05 ng/l |
| Yes | T1~T2 | N0    | Yes | ≥2 | <5 cm | <0.05 ng/l |
| No  | T1~T2 | N1~N3 | Yes | <2 | <5 cm | <0.05 ng/l |
| No  | T1~T2 | N0    | No  | <2 | ≥5 cm | <0.05 ng/l |
| No  | T1~T2 | N0    | No  | <2 | <5 cm | <0.05 ng/l |
| No  | T3~T4 | N0    | No  | ≥2 | <5 cm | <0.05 ng/l |
| No  | T3~T4 | N0    | No  | <2 | ≥5 cm | <0.05 ng/l |
| No  | T3~T4 | N0    | No  | ≥2 | ≥5 cm | <0.05 ng/l |
| No  | T1~T2 | N0    | Yes | ≥2 | ≥5 cm | <0.05 ng/l |
| No  | T1~T2 | N0    | No  | <2 | <5 cm | <0.05 ng/l |
| No  | T1~T2 | N1~N3 | No  | <2 | ≥5 cm | <0.05 ng/l |
| No  | T1~T2 | N1~N3 | No  | <2 | ≥5 cm | <0.05 ng/l |
| No  | T3~T4 | N0    | No  | <2 | ≥5 cm | <0.05 ng/l |
| No  | T3~T4 | N0    | No  | <2 | ≥5 cm | ≥0.05 ng/l |
| Yes | T1~T2 | N0    | No  | <2 | <5 cm | ≥0.05 ng/l |
| No  | T1~T2 | N0    | No  | <2 | ≥5 cm | <0.05 ng/l |
| No  | T1~T2 | N0    | No  | <2 | ≥5 cm | <0.05 ng/l |
| No  | T1~T2 | N0    | Yes | <2 | ≥5 cm | <0.05 ng/l |
| Yes | T1~T2 | N1~N3 | Yes | <2 | <5 cm | ≥0.05 ng/l |
| Yes | T1~T2 | N0    | Yes | <2 | <5 cm | <0.05 ng/l |
| No  | T1~T2 | N1~N3 | No  | <2 | <5 cm | ≥0.05 ng/l |
| No  | T1~T2 | N0    | No  | <2 | <5 cm | <0.05 ng/l |
| No  | T1~T2 | N0    | No  | <2 | ≥5 cm | ≥0.05 ng/l |
| Yes | T1~T2 | N0    | No  | ≥2 | ≥5 cm | ≥0.05 ng/l |
| Yes | T3~T4 | N0    | No  | <2 | <5 cm | ≥0.05 ng/l |
| No  | T3~T4 | N0    | No  | ≥2 | ≥5 cm | <0.05 ng/l |
| No  | T3~T4 | N0    | No  | <2 | ≥5 cm | <0.05 ng/l |
| No  | T1~T2 | N0    | No  | ≥2 | <5 cm | <0.05 ng/l |
| No  | T1~T2 | N0    | No  | <2 | <5 cm | <0.05 ng/l |
| No  | T1~T2 | N0    | No  | ≥2 | ≥5 cm | <0.05 ng/l |
| No  | T1~T2 | N1~N3 | No  | ≥2 | <5 cm | <0.05 ng/l |
| No  | T3~T4 | N1~N3 | No  | ≥2 | ≥5 cm | <0.05 ng/l |
| No  | T1~T2 | N0    | No  | <2 | ≥5 cm | <0.05 ng/l |
| No  | T1~T2 | N1~N3 | No  | <2 | ≥5 cm | <0.05 ng/l |
| No  | T3~T4 | N0    | No  | <2 | <5 cm | <0.05 ng/l |
| No  | T3~T4 | N0    | No  | <2 | ≥5 cm | <0.05 ng/l |
| No  | T3~T4 | N0    | No  | <2 | ≥5 cm | <0.05 ng/l |

|     |       |       |     |    |       |            |
|-----|-------|-------|-----|----|-------|------------|
| No  | T1~T2 | N0    | No  | <2 | <5 cm | <0.05 ng/l |
| No  | T1~T2 | N1~N3 | No  | <2 | <5 cm | <0.05 ng/l |
| Yes | T1~T2 | N0    | Yes | <2 | <5 cm | ≥0.05 ng/l |
| Yes | T1~T2 | N0    | No  | <2 | <5 cm | ≥0.05 ng/l |
| No  | T1~T2 | N1~N3 | No  | <2 | <5 cm | <0.05 ng/l |
| No  | T1~T2 | N1~N3 | No  | <2 | <5 cm | ≥0.05 ng/l |
| No  | T1~T2 | N0    | No  | <2 | <5 cm | <0.05 ng/l |
| No  | T1~T2 | N1~N3 | No  | <2 | ≥5 cm | ≥0.05 ng/l |
| No  | T1~T2 | N0    | No  | <2 | ≥5 cm | ≥0.05 ng/l |
| No  | T1~T2 | N0    | No  | <2 | <5 cm | ≥0.05 ng/l |
| No  | T1~T2 | N0    | No  | <2 | <5 cm | ≥0.05 ng/l |
| No  | T1~T2 | N0    | No  | ≥2 | <5 cm | ≥0.05 ng/l |
| No  | T3~T4 | N1~N3 | Yes | ≥2 | ≥5 cm | <0.05 ng/l |
| No  | T1~T2 | N0    | Yes | ≥2 | ≥5 cm | <0.05 ng/l |
| No  | T1~T2 | N0    | No  | <2 | <5 cm | <0.05 ng/l |
| No  | T3~T4 | N0    | No  | <2 | ≥5 cm | <0.05 ng/l |
| No  | T3~T4 | N0    | No  | <2 | ≥5 cm | <0.05 ng/l |
| Yes | T1~T2 | N1~N3 | No  | <2 | <5 cm | <0.05 ng/l |
| No  | T1~T2 | N0    | No  | <2 | ≥5 cm | <0.05 ng/l |
| Yes | T1~T2 | N1~N3 | No  | <2 | <5 cm | <0.05 ng/l |
| Yes | T3~T4 | N1~N3 | No  | <2 | <5 cm | <0.05 ng/l |
| No  | T1~T2 | N0    | No  | <2 | <5 cm | <0.05 ng/l |
| No  | T1~T2 | N1~N3 | No  | <2 | ≥5 cm | <0.05 ng/l |
| No  | T3~T4 | N0    | No  | <2 | ≥5 cm | <0.05 ng/l |
| No  | T1~T2 | N0    | No  | <2 | <5 cm | <0.05 ng/l |
| No  | T1~T2 | N0    | No  | <2 | ≥5 cm | <0.05 ng/l |
| No  | T1~T2 | N0    | No  | <2 | <5 cm | <0.05 ng/l |
| No  | T1~T2 | N1~N3 | No  | <2 | <5 cm | <0.05 ng/l |
| No  | T1~T2 | N0    | No  | <2 | ≥5 cm | <0.05 ng/l |
| No  | T3~T4 | N0    | No  | <2 | ≥5 cm | <0.05 ng/l |
| No  | T1~T2 | N0    | No  | <2 | <5 cm | ≥0.05 ng/l |
| No  | T1~T2 | N0    | No  | <2 | <5 cm | ≥0.05 ng/l |
| No  | T1~T2 | N1~N3 | No  | ≥2 | <5 cm | <0.05 ng/l |
| No  | T1~T2 | N0    | No  | ≥2 | <5 cm | <0.05 ng/l |
| No  | T1~T2 | N0    | No  | ≥2 | <5 cm | ≥0.05 ng/l |
| No  | T1~T2 | N0    | No  | ≥2 | <5 cm | <0.05 ng/l |
| No  | T1~T2 | N1~N3 | No  | ≥2 | ≥5 cm | <0.05 ng/l |
| No  | T1~T2 | N1~N3 | No  | <2 | <5 cm | <0.05 ng/l |
| Yes | T1~T2 | N0    | No  | <2 | <5 cm | <0.05 ng/l |
| Yes | T3~T4 | N1~N3 | Yes | <2 | <5 cm | <0.05 ng/l |
| No  | T3~T4 | N0    | No  | <2 | <5 cm | <0.05 ng/l |
| Yes | T1~T2 | N0    | Yes | <2 | <5 cm | <0.05 ng/l |
| No  | T1~T2 | N0    | No  | <2 | <5 cm | <0.05 ng/l |
| No  | T1~T2 | N0    | No  | <2 | <5 cm | <0.05 ng/l |
| No  | T3~T4 | N1~N3 | No  | <2 | <5 cm | <0.05 ng/l |
| No  | T1~T2 | N0    | No  | <2 | <5 cm | <0.05 ng/l |
| No  | T3~T4 | N0    | No  | <2 | ≥5 cm | <0.05 ng/l |
| No  | T3~T4 | N0    | No  | <2 | ≥5 cm | <0.05 ng/l |
| No  | T1~T2 | N0    | No  | <2 | <5 cm | <0.05 ng/l |
| No  | T1~T2 | N1~N3 | No  | <2 | ≥5 cm | <0.05 ng/l |
| No  | T1~T2 | N0    | No  | <2 | <5 cm | <0.05 ng/l |
| No  | T1~T2 | N0    | No  | <2 | <5 cm | <0.05 ng/l |
| No  | T1~T2 | N0    | No  | <2 | <5 cm | <0.05 ng/l |
| No  | T1~T2 | N1~N3 | No  | ≥2 | ≥5 cm | ≥0.05 ng/l |

|     |       |       |     |    |       |            |
|-----|-------|-------|-----|----|-------|------------|
| No  | T1~T2 | N1~N3 | No  | ≥2 | ≥5 cm | <0.05 ng/l |
| No  | T1~T2 | N0    | No  | <2 | <5 cm | ≥0.05 ng/l |
| No  | T1~T2 | N1~N3 | No  | <2 | ≥5 cm | <0.05 ng/l |
| No  | T1~T2 | N0    | No  | ≥2 | <5 cm | <0.05 ng/l |
| No  | T1~T2 | N0    | No  | <2 | <5 cm | <0.05 ng/l |
| No  | T1~T2 | N0    | No  | <2 | ≥5 cm | <0.05 ng/l |
| Yes | T1~T2 | N0    | No  | <2 | ≥5 cm | <0.05 ng/l |
| Yes | T1~T2 | N1~N3 | No  | <2 | <5 cm | <0.05 ng/l |
| No  | T1~T2 | N0    | No  | <2 | <5 cm | <0.05 ng/l |
| No  | T3~T4 | N0    | Yes | ≥2 | <5 cm | <0.05 ng/l |
| No  | T1~T2 | N0    | No  | <2 | <5 cm | <0.05 ng/l |
| No  | T1~T2 | N0    | No  | <2 | <5 cm | <0.05 ng/l |
| No  | T1~T2 | N1~N3 | No  | <2 | <5 cm | <0.05 ng/l |
| No  | T1~T2 | N0    | No  | ≥2 | <5 cm | <0.05 ng/l |
| No  | T3~T4 | N1~N3 | Yes | <2 | <5 cm | <0.05 ng/l |
| No  | T3~T4 | N1~N3 | No  | <2 | <5 cm | ≥0.05 ng/l |
| No  | T1~T2 | N0    | No  | ≥2 | <5 cm | ≥0.05 ng/l |
| No  | T1~T2 | N1~N3 | No  | <2 | <5 cm | ≥0.05 ng/l |
| No  | T3~T4 | N0    | No  | ≥2 | <5 cm | <0.05 ng/l |
| No  | T3~T4 | N0    | No  | <2 | <5 cm | ≥0.05 ng/l |
| Yes | T1~T2 | N0    | No  | <2 | <5 cm | ≥0.05 ng/l |
| Yes | T1~T2 | N0    | No  | <2 | <5 cm | <0.05 ng/l |
| No  | T1~T2 | N1~N3 | No  | <2 | <5 cm | <0.05 ng/l |
| No  | T1~T2 | N0    | No  | <2 | ≥5 cm | ≥0.05 ng/l |
| No  | T1~T2 | N0    | No  | <2 | ≥5 cm | <0.05 ng/l |
| No  | T1~T2 | N0    | No  | <2 | <5 cm | <0.05 ng/l |
| No  | T1~T2 | N0    | No  | <2 | ≥5 cm | ≥0.05 ng/l |
| No  | T1~T2 | N1~N3 | No  | <2 | <5 cm | <0.05 ng/l |
| No  | T1~T2 | N0    | No  | <2 | <5 cm | <0.05 ng/l |
| No  | T1~T2 | N0    | No  | <2 | <5 cm | <0.05 ng/l |
| No  | T1~T2 | N0    | No  | <2 | ≥5 cm | <0.05 ng/l |
| No  | T3~T4 | N0    | No  | <2 | ≥5 cm | <0.05 ng/l |
| No  | T1~T2 | N0    | No  | ≥2 | <5 cm | <0.05 ng/l |
| No  | T1~T2 | N0    | No  | <2 | ≥5 cm | <0.05 ng/l |
| No  | T1~T2 | N0    | Yes | <2 | <5 cm | <0.05 ng/l |
| No  | T1~T2 | N1~N3 | No  | ≥2 | <5 cm | <0.05 ng/l |
| No  | T3~T4 | N1~N3 | Yes | <2 | ≥5 cm | <0.05 ng/l |
| Yes | T1~T2 | N0    | No  | ≥2 | ≥5 cm | <0.05 ng/l |
| Yes | T1~T2 | N0    | No  | <2 | <5 cm | ≥0.05 ng/l |
| Yes | T1~T2 | N0    | No  | ≥2 | <5 cm | ≥0.05 ng/l |
| No  | T3~T4 | N0    | No  | ≥2 | <5 cm | <0.05 ng/l |
| Yes | T1~T2 | N0    | No  | <2 | <5 cm | <0.05 ng/l |
| No  | T1~T2 | N0    | No  | <2 | <5 cm | <0.05 ng/l |
| No  | T3~T4 | N1~N3 | No  | <2 | <5 cm | <0.05 ng/l |
| No  | T3~T4 | N0    | No  | <2 | ≥5 cm | ≥0.05 ng/l |
| No  | T3~T4 | N1~N3 | No  | <2 | ≥5 cm | ≥0.05 ng/l |
| No  | T3~T4 | N0    | No  | <2 | <5 cm | <0.05 ng/l |
| No  | T1~T2 | N0    | No  | <2 | <5 cm | ≥0.05 ng/l |
| No  | T1~T2 | N0    | No  | <2 | <5 cm | <0.05 ng/l |
| No  | T1~T2 | N1~N3 | No  | <2 | <5 cm | <0.05 ng/l |
| No  | T1~T2 | N1~N3 | No  | <2 | <5 cm | <0.05 ng/l |
| No  | T3~T4 | N0    | No  | <2 | <5 cm | <0.05 ng/l |
| No  | T1~T2 | N1~N3 | No  | <2 | <5 cm | <0.05 ng/l |
| No  | T1~T2 | N0    | No  | <2 | <5 cm | <0.05 ng/l |

|     |       |       |     |    |       |            |
|-----|-------|-------|-----|----|-------|------------|
| No  | T3~T4 | N0    | No  | <2 | <5 cm | <0.05 ng/l |
| No  | T3~T4 | N0    | No  | <2 | <5 cm | <0.05 ng/l |
| No  | T3~T4 | N0    | No  | ≥2 | <5 cm | <0.05 ng/l |
| No  | T1~T2 | N1~N3 | No  | <2 | <5 cm | <0.05 ng/l |
| No  | T1~T2 | N0    | No  | <2 | ≥5 cm | <0.05 ng/l |
| No  | T1~T2 | N0    | No  | <2 | ≥5 cm | <0.05 ng/l |
| Yes | T1~T2 | N0    | No  | ≥2 | <5 cm | <0.05 ng/l |
| Yes | T1~T2 | N0    | No  | ≥2 | ≥5 cm | <0.05 ng/l |
| Yes | T1~T2 | N1~N3 | No  | <2 | ≥5 cm | <0.05 ng/l |
| No  | T1~T2 | N0    | No  | <2 | <5 cm | ≥0.05 ng/l |
| Yes | T1~T2 | N0    | No  | <2 | ≥5 cm | ≥0.05 ng/l |
| Yes | T1~T2 | N0    | No  | <2 | <5 cm | ≥0.05 ng/l |
| No  | T1~T2 | N0    | No  | <2 | ≥5 cm | <0.05 ng/l |
| Yes | T1~T2 | N0    | No  | ≥2 | <5 cm | <0.05 ng/l |
| No  | T1~T2 | N0    | No  | ≥2 | ≥5 cm | <0.05 ng/l |
| No  | T1~T2 | N0    | No  | <2 | ≥5 cm | ≥0.05 ng/l |
| No  | T1~T2 | N1~N3 | No  | <2 | <5 cm | ≥0.05 ng/l |
| No  | T3~T4 | N1~N3 | No  | <2 | <5 cm | <0.05 ng/l |
| No  | T1~T2 | N0    | No  | <2 | <5 cm | ≥0.05 ng/l |
| No  | T3~T4 | N0    | No  | <2 | <5 cm | <0.05 ng/l |
| No  | T1~T2 | N0    | No  | <2 | ≥5 cm | <0.05 ng/l |
| No  | T1~T2 | N0    | No  | <2 | <5 cm | <0.05 ng/l |
| No  | T3~T4 | N1~N3 | No  | <2 | ≥5 cm | <0.05 ng/l |
| No  | T1~T2 | N1~N3 | No  | <2 | <5 cm | <0.05 ng/l |
| No  | T1~T2 | N0    | No  | <2 | ≥5 cm | <0.05 ng/l |
| No  | T1~T2 | N1~N3 | No  | <2 | <5 cm | <0.05 ng/l |
| No  | T1~T2 | N0    | No  | <2 | ≥5 cm | <0.05 ng/l |
| No  | T1~T2 | N0    | No  | <2 | <5 cm | <0.05 ng/l |
| No  | T1~T2 | N0    | No  | <2 | <5 cm | <0.05 ng/l |
| No  | T1~T2 | N1~N3 | No  | <2 | <5 cm | <0.05 ng/l |
| No  | T1~T2 | N0    | No  | ≥2 | <5 cm | <0.05 ng/l |
| No  | T1~T2 | N0    | No  | ≥2 | <5 cm | <0.05 ng/l |
| No  | T1~T2 | N0    | Yes | ≥2 | ≥5 cm | ≥0.05 ng/l |
| Yes | T1~T2 | N0    | Yes | ≥2 | ≥5 cm | <0.05 ng/l |
| No  | T1~T2 | N1~N3 | Yes | <2 | ≥5 cm | ≥0.05 ng/l |
| No  | T1~T2 | N1~N3 | No  | <2 | <5 cm | <0.05 ng/l |
| No  | T1~T2 | N0    | No  | <2 | <5 cm | <0.05 ng/l |
| No  | T1~T2 | N1~N3 | No  | <2 | <5 cm | <0.05 ng/l |
| Yes | T1~T2 | N1~N3 | No  | <2 | <5 cm | <0.05 ng/l |
| Yes | T1~T2 | N0    | Yes | <2 | ≥5 cm | ≥0.05 ng/l |
| No  | T1~T2 | N1~N3 | No  | <2 | <5 cm | <0.05 ng/l |
| No  | T1~T2 | N1~N3 | No  | <2 | <5 cm | <0.05 ng/l |
| No  | T1~T2 | N0    | No  | <2 | <5 cm | <0.05 ng/l |
| No  | T1~T2 | N1~N3 | Yes | <2 | ≥5 cm | <0.05 ng/l |
| No  | T1~T2 | N0    | Yes | <2 | ≥5 cm | <0.05 ng/l |
| No  | T1~T2 | N0    | Yes | <2 | ≥5 cm | <0.05 ng/l |
| No  | T1~T2 | N1~N3 | No  | <2 | <5 cm | <0.05 ng/l |
| No  | T1~T2 | N1~N3 | No  | <2 | <5 cm | <0.05 ng/l |
| No  | T1~T2 | N0    | No  | ≥2 | <5 cm | <0.05 ng/l |
| No  | T1~T2 | N1~N3 | No  | <2 | <5 cm | <0.05 ng/l |
| No  | T1~T2 | N0    | No  | <2 | ≥5 cm | <0.05 ng/l |
| No  | T1~T2 | N0    | No  | ≥2 | ≥5 cm | ≥0.05 ng/l |
| No  | T1~T2 | N0    | No  | ≥2 | ≥5 cm | <0.05 ng/l |



|     |       |       |     |    |       |            |
|-----|-------|-------|-----|----|-------|------------|
| No  | T1~T2 | N0    | No  | <2 | <5 cm | <0.05 ng/l |
| No  | T1~T2 | N1~N3 | No  | <2 | <5 cm | ≥0.05 ng/l |
| No  | T1~T2 | N0    | No  | <2 | <5 cm | <0.05 ng/l |
| No  | T1~T2 | N0    | No  | <2 | <5 cm | ≥0.05 ng/l |
| No  | T1~T2 | N0    | No  | <2 | <5 cm | <0.05 ng/l |
| No  | T1~T2 | N0    | No  | <2 | ≥5 cm | <0.05 ng/l |
| No  | T1~T2 | N1~N3 | No  | <2 | <5 cm | <0.05 ng/l |
| No  | T1~T2 | N0    | No  | <2 | ≥5 cm | <0.05 ng/l |
| No  | T1~T2 | N0    | No  | <2 | <5 cm | <0.05 ng/l |
| No  | T1~T2 | N0    | No  | <2 | ≥5 cm | <0.05 ng/l |
| No  | T1~T2 | N0    | No  | <2 | <5 cm | ≥0.05 ng/l |
| Yes | T1~T2 | N0    | No  | <2 | <5 cm | <0.05 ng/l |
| No  | T1~T2 | N0    | No  | <2 | ≥5 cm | <0.05 ng/l |
| No  | T1~T2 | N0    | No  | <2 | <5 cm | <0.05 ng/l |
| Yes | T1~T2 | N1~N3 | No  | <2 | <5 cm | <0.05 ng/l |
| Yes | T1~T2 | N1~N3 | No  | <2 | <5 cm | <0.05 ng/l |
| No  | T1~T2 | N0    | No  | <2 | <5 cm | <0.05 ng/l |
| Yes | T1~T2 | N0    | No  | ≥2 | <5 cm | <0.05 ng/l |
| No  | T1~T2 | N0    | No  | <2 | <5 cm | <0.05 ng/l |
| No  | T1~T2 | N0    | No  | <2 | <5 cm | <0.05 ng/l |
| No  | T3~T4 | N0    | No  | <2 | <5 cm | <0.05 ng/l |
| No  | T1~T2 | N0    | No  | ≥2 | ≥5 cm | <0.05 ng/l |
| No  | T1~T2 | N1~N3 | No  | <2 | ≥5 cm | <0.05 ng/l |
| No  | T3~T4 | N0    | No  | ≥2 | ≥5 cm | <0.05 ng/l |
| No  | T3~T4 | N1~N3 | No  | ≥2 | <5 cm | <0.05 ng/l |
| No  | T1~T2 | N0    | No  | <2 | <5 cm | <0.05 ng/l |
| No  | T3~T4 | N0    | No  | ≥2 | <5 cm | <0.05 ng/l |
| No  | T3~T4 | N0    | No  | ≥2 | <5 cm | <0.05 ng/l |
| No  | T1~T2 | N0    | No  | <2 | ≥5 cm | <0.05 ng/l |
| No  | T1~T2 | N0    | No  | <2 | <5 cm | <0.05 ng/l |
| No  | T1~T2 | N0    | No  | <2 | <5 cm | <0.05 ng/l |
| No  | T1~T2 | N0    | No  | <2 | ≥5 cm | ≥0.05 ng/l |
| No  | T1~T2 | N0    | No  | <2 | ≥5 cm | ≥0.05 ng/l |
| No  | T1~T2 | N0    | No  | <2 | ≥5 cm | <0.05 ng/l |
| No  | T1~T2 | N0    | No  | <2 | <5 cm | <0.05 ng/l |
| Yes | T1~T2 | N0    | No  | <2 | <5 cm | <0.05 ng/l |
| Yes | T1~T2 | N0    | No  | <2 | <5 cm | <0.05 ng/l |
| No  | T1~T2 | N0    | No  | <2 | <5 cm | <0.05 ng/l |
| No  | T1~T2 | N0    | No  | <2 | ≥5 cm | <0.05 ng/l |
| Yes | T1~T2 | N0    | No  | <2 | ≥5 cm | <0.05 ng/l |
| No  | T1~T2 | N0    | No  | <2 | ≥5 cm | <0.05 ng/l |
| No  | T1~T2 | N0    | No  | <2 | ≥5 cm | <0.05 ng/l |
| No  | T1~T2 | N0    | No  | <2 | ≥5 cm | <0.05 ng/l |
| No  | T1~T2 | N0    | No  | ≥2 | <5 cm | <0.05 ng/l |
| No  | T1~T2 | N0    | No  | ≥2 | <5 cm | <0.05 ng/l |
| No  | T1~T2 | N0    | No  | <2 | <5 cm | <0.05 ng/l |
| No  | T1~T2 | N0    | Yes | <2 | ≥5 cm | <0.05 ng/l |
| No  | T1~T2 | N0    | No  | ≥2 | ≥5 cm | <0.05 ng/l |
| No  | T1~T2 | N1~N3 | No  | <2 | ≥5 cm | ≥0.05 ng/l |
| No  | T1~T2 | N1~N3 | No  | <2 | <5 cm | ≥0.05 ng/l |
| No  | T1~T2 | N0    | No  | <2 | <5 cm | <0.05 ng/l |
| No  | T1~T2 | N1~N3 | No  | <2 | <5 cm | <0.05 ng/l |
| No  | T1~T2 | N0    | No  | <2 | <5 cm | ≥0.05 ng/l |

|     |       |       |     |    |       |            |
|-----|-------|-------|-----|----|-------|------------|
| No  | T3~T4 | N0    | No  | <2 | ≥5 cm | <0.05 ng/l |
| No  | T1~T2 | N0    | No  | <2 | <5 cm | ≥0.05 ng/l |
| Yes | T1~T2 | N0    | No  | <2 | <5 cm | <0.05 ng/l |
| No  | T1~T2 | N1~N3 | No  | <2 | <5 cm | <0.05 ng/l |
| Yes | T3~T4 | N0    | No  | <2 | ≥5 cm | <0.05 ng/l |
| Yes | T3~T4 | N0    | No  | <2 | ≥5 cm | <0.05 ng/l |
| Yes | T1~T2 | N0    | No  | <2 | ≥5 cm | <0.05 ng/l |
| No  | T1~T2 | N0    | No  | <2 | <5 cm | <0.05 ng/l |
| No  | T1~T2 | N1~N3 | No  | <2 | <5 cm | <0.05 ng/l |
| No  | T1~T2 | N0    | No  | <2 | <5 cm | <0.05 ng/l |
| No  | T1~T2 | N0    | Yes | <2 | <5 cm | <0.05 ng/l |
| Yes | T1~T2 | N0    | Yes | <2 | ≥5 cm | <0.05 ng/l |
| No  | T1~T2 | N0    | No  | <2 | ≥5 cm | <0.05 ng/l |
| No  | T1~T2 | N0    | No  | ≥2 | ≥5 cm | <0.05 ng/l |
| No  | T1~T2 | N0    | No  | <2 | <5 cm | <0.05 ng/l |
| No  | T3~T4 | N0    | No  | ≥2 | <5 cm | ≥0.05 ng/l |
| No  | T1~T2 | N1~N3 | No  | ≥2 | <5 cm | <0.05 ng/l |
| No  | T3~T4 | N1~N3 | No  | <2 | <5 cm | ≥0.05 ng/l |
| No  | T1~T2 | N0    | No  | <2 | <5 cm | <0.05 ng/l |
| No  | T3~T4 | N0    | No  | <2 | <5 cm | ≥0.05 ng/l |
| No  | T1~T2 | N0    | No  | <2 | <5 cm | ≥0.05 ng/l |
| No  | T3~T4 | N0    | No  | <2 | <5 cm | <0.05 ng/l |
| No  | T3~T4 | N0    | No  | <2 | <5 cm | <0.05 ng/l |
| No  | T1~T2 | N0    | No  | <2 | ≥5 cm | ≥0.05 ng/l |
| No  | T1~T2 | N1~N3 | No  | <2 | ≥5 cm | <0.05 ng/l |
| No  | T1~T2 | N0    | Yes | <2 | ≥5 cm | <0.05 ng/l |
| No  | T1~T2 | N1~N3 | No  | <2 | <5 cm | <0.05 ng/l |
| No  | T1~T2 | N0    | No  | <2 | <5 cm | <0.05 ng/l |
| No  | T1~T2 | N0    | No  | <2 | <5 cm | ≥0.05 ng/l |
| No  | T1~T2 | N0    | No  | <2 | <5 cm | ≥0.05 ng/l |
| No  | T1~T2 | N0    | No  | <2 | <5 cm | ≥0.05 ng/l |
| No  | T1~T2 | N0    | No  | <2 | ≥5 cm | <0.05 ng/l |
| Yes | T1~T2 | N0    | No  | <2 | <5 cm | <0.05 ng/l |
| No  | T3~T4 | N1~N3 | No  | ≥2 | <5 cm | <0.05 ng/l |
| Yes | T3~T4 | N1~N3 | No  | <2 | <5 cm | <0.05 ng/l |
| No  | T1~T2 | N0    | No  | <2 | ≥5 cm | <0.05 ng/l |
| No  | T1~T2 | N1~N3 | No  | ≥2 | ≥5 cm | <0.05 ng/l |
| No  | T1~T2 | N0    | No  | ≥2 | ≥5 cm | <0.05 ng/l |
| No  | T1~T2 | N0    | No  | ≥2 | <5 cm | <0.05 ng/l |
| No  | T1~T2 | N0    | No  | ≥2 | <5 cm | <0.05 ng/l |
| No  | T3~T4 | N0    | No  | <2 | <5 cm | <0.05 ng/l |
| No  | T1~T2 | N1~N3 | No  | <2 | <5 cm | <0.05 ng/l |
| No  | T3~T4 | N0    | No  | <2 | ≥5 cm | <0.05 ng/l |
| No  | T3~T4 | N0    | No  | <2 | ≥5 cm | ≥0.05 ng/l |
| No  | T3~T4 | N0    | No  | <2 | ≥5 cm | ≥0.05 ng/l |
| No  | T1~T2 | N0    | No  | <2 | <5 cm | ≥0.05 ng/l |
| No  | T1~T2 | N1~N3 | No  | <2 | <5 cm | <0.05 ng/l |
| No  | T1~T2 | N0    | No  | <2 | <5 cm | <0.05 ng/l |
| No  | T3~T4 | N0    | No  | <2 | <5 cm | ≥0.05 ng/l |
| No  | T3~T4 | N0    | Yes | <2 | ≥5 cm | <0.05 ng/l |
| No  | T1~T2 | N0    | No  | <2 | <5 cm | <0.05 ng/l |
| Yes | T1~T2 | N0    | Yes | <2 | ≥5 cm | ≥0.05 ng/l |
| No  | T1~T2 | N0    | No  | <2 | <5 cm | <0.05 ng/l |
| No  | T1~T2 | N0    | No  | <2 | <5 cm | <0.05 ng/l |
| No  | T1~T2 | N1~N3 | No  | <2 | <5 cm | <0.05 ng/l |

|     |       |       |     |    |       |            |
|-----|-------|-------|-----|----|-------|------------|
| No  | T1~T2 | N1~N3 | No  | <2 | <5 cm | ≥0.05 ng/l |
| No  | T1~T2 | N0    | No  | <2 | <5 cm | <0.05 ng/l |
| No  | T1~T2 | N0    | No  | <2 | ≥5 cm | <0.05 ng/l |
| No  | T3~T4 | N0    | No  | <2 | ≥5 cm | <0.05 ng/l |
| Yes | T3~T4 | N0    | No  | <2 | <5 cm | <0.05 ng/l |
| No  | T1~T2 | N0    | No  | ≥2 | ≥5 cm | <0.05 ng/l |
| No  | T3~T4 | N0    | No  | <2 | <5 cm | <0.05 ng/l |
| No  | T1~T2 | N1~N3 | No  | ≥2 | <5 cm | <0.05 ng/l |
| No  | T1~T2 | N0    | No  | ≥2 | ≥5 cm | <0.05 ng/l |
| No  | T3~T4 | N1~N3 | No  | ≥2 | <5 cm | <0.05 ng/l |
| No  | T1~T2 | N0    | No  | ≥2 | ≥5 cm | <0.05 ng/l |
| No  | T1~T2 | N0    | No  | <2 | <5 cm | <0.05 ng/l |
| No  | T1~T2 | N0    | No  | ≥2 | <5 cm | ≥0.05 ng/l |
| No  | T1~T2 | N0    | No  | ≥2 | <5 cm | ≥0.05 ng/l |
| No  | T1~T2 | N0    | No  | <2 | <5 cm | ≥0.05 ng/l |
| No  | T1~T2 | N0    | No  | <2 | <5 cm | <0.05 ng/l |
| No  | T1~T2 | N0    | No  | <2 | ≥5 cm | <0.05 ng/l |
| No  | T1~T2 | N0    | No  | <2 | ≥5 cm | ≥0.05 ng/l |
| No  | T1~T2 | N0    | No  | <2 | <5 cm | ≥0.05 ng/l |
| No  | T1~T2 | N0    | No  | <2 | ≥5 cm | <0.05 ng/l |
| Yes | T1~T2 | N0    | No  | <2 | <5 cm | ≥0.05 ng/l |
| No  | T1~T2 | N0    | No  | <2 | <5 cm | <0.05 ng/l |
| No  | T1~T2 | N0    | No  | <2 | ≥5 cm | <0.05 ng/l |
| No  | T1~T2 | N0    | No  | <2 | ≥5 cm | <0.05 ng/l |
| Yes | T1~T2 | N0    | Yes | <2 | ≥5 cm | <0.05 ng/l |
| Yes | T1~T2 | N0    | No  | <2 | <5 cm | <0.05 ng/l |
| Yes | T1~T2 | N0    | No  | <2 | <5 cm | <0.05 ng/l |
| Yes | T1~T2 | N0    | No  | <2 | <5 cm | <0.05 ng/l |
| Yes | T1~T2 | N0    | No  | <2 | <5 cm | <0.05 ng/l |
| No  | T1~T2 | N0    | No  | <2 | ≥5 cm | <0.05 ng/l |
| Yes | T1~T2 | N0    | No  | <2 | <5 cm | <0.05 ng/l |
| No  | T1~T2 | N0    | No  | <2 | <5 cm | <0.05 ng/l |
| No  | T1~T2 | N0    | No  | <2 | ≥5 cm | ≥0.05 ng/l |
| No  | T1~T2 | N0    | No  | ≥2 | ≥5 cm | <0.05 ng/l |
| No  | T3~T4 | N0    | No  | ≥2 | ≥5 cm | ≥0.05 ng/l |
| No  | T3~T4 | N0    | No  | ≥2 | ≥5 cm | <0.05 ng/l |
| No  | T3~T4 | N0    | No  | <2 | ≥5 cm | <0.05 ng/l |
| No  | T1~T2 | N0    | No  | <2 | ≥5 cm | <0.05 ng/l |
| No  | T1~T2 | N0    | No  | <2 | ≥5 cm | ≥0.05 ng/l |
| No  | T3~T4 | N1~N3 | No  | <2 | <5 cm | ≥0.05 ng/l |
| No  | T1~T2 | N0    | No  | ≥2 | <5 cm | ≥0.05 ng/l |
| No  | T1~T2 | N0    | No  | <2 | <5 cm | <0.05 ng/l |
| No  | T1~T2 | N0    | Yes | ≥2 | ≥5 cm | <0.05 ng/l |
| No  | T1~T2 | N0    | Yes | <2 | <5 cm | <0.05 ng/l |
| No  | T1~T2 | N0    | No  | ≥2 | <5 cm | <0.05 ng/l |
| No  | T1~T2 | N1~N3 | Yes | <2 | ≥5 cm | ≥0.05 ng/l |
| No  | T1~T2 | N1~N3 | Yes | <2 | <5 cm | <0.05 ng/l |
| No  | T1~T2 | N1~N3 | No  | <2 | <5 cm | <0.05 ng/l |
| No  | T1~T2 | N0    | No  | <2 | ≥5 cm | <0.05 ng/l |
| No  | T3~T4 | N0    | No  | ≥2 | <5 cm | <0.05 ng/l |
| No  | T1~T2 | N0    | Yes | <2 | <5 cm | <0.05 ng/l |
| No  | T3~T4 | N0    | Yes | <2 | ≥5 cm | <0.05 ng/l |
| No  | T1~T2 | N1~N3 | Yes | ≥2 | ≥5 cm | <0.05 ng/l |
| No  | T1~T2 | N0    | Yes | <2 | <5 cm | <0.05 ng/l |

|     |       |       |     |    |       |            |
|-----|-------|-------|-----|----|-------|------------|
| Yes | T1~T2 | N0    | Yes | ≥2 | <5 cm | <0.05 ng/l |
| Yes | T1~T2 | N0    | Yes | ≥2 | <5 cm | <0.05 ng/l |
| Yes | T1~T2 | N0    | Yes | ≥2 | <5 cm | <0.05 ng/l |
| No  | T1~T2 | N1~N3 | No  | <2 | <5 cm | <0.05 ng/l |
| No  | T1~T2 | N1~N3 | Yes | <2 | <5 cm | <0.05 ng/l |
| No  | T1~T2 | N0    | No  | ≥2 | <5 cm | <0.05 ng/l |
| No  | T1~T2 | N1~N3 | Yes | ≥2 | <5 cm | <0.05 ng/l |
| No  | T1~T2 | N1~N3 | No  | <2 | <5 cm | <0.05 ng/l |
| No  | T3~T4 | N0    | Yes | ≥2 | <5 cm | <0.05 ng/l |
| No  | T1~T2 | N1~N3 | Yes | <2 | <5 cm | <0.05 ng/l |
| Yes | T1~T2 | N1~N3 | Yes | <2 | <5 cm | <0.05 ng/l |
| Yes | T3~T4 | N1~N3 | Yes | <2 | <5 cm | ≥0.05 ng/l |
| Yes | T1~T2 | N1~N3 | No  | <2 | <5 cm | <0.05 ng/l |
| No  | T3~T4 | N1~N3 | No  | ≥2 | ≥5 cm | ≥0.05 ng/l |
| No  | T1~T2 | N0    | No  | ≥2 | <5 cm | <0.05 ng/l |
| Yes | T3~T4 | N1~N3 | No  | <2 | ≥5 cm | <0.05 ng/l |
| No  | T1~T2 | N0    | Yes | <2 | <5 cm | ≥0.05 ng/l |
| No  | T1~T2 | N0    | Yes | <2 | ≥5 cm | <0.05 ng/l |
| No  | T3~T4 | N0    | No  | <2 | ≥5 cm | ≥0.05 ng/l |
| Yes | T3~T4 | N0    | No  | ≥2 | <5 cm | <0.05 ng/l |
| No  | T3~T4 | N0    | No  | <2 | <5 cm | <0.05 ng/l |
| No  | T1~T2 | N0    | No  | ≥2 | <5 cm | <0.05 ng/l |
| No  | T3~T4 | N0    | No  | ≥2 | <5 cm | <0.05 ng/l |
| Yes | T1~T2 | N1~N3 | No  | <2 | ≥5 cm | ≥0.05 ng/l |
| Yes | T3~T4 | N0    | No  | <2 | <5 cm | ≥0.05 ng/l |
| No  | T3~T4 | N1~N3 | No  | <2 | <5 cm | <0.05 ng/l |
| No  | T1~T2 | N1~N3 | No  | <2 | <5 cm | <0.05 ng/l |
| No  | T1~T2 | N1~N3 | No  | <2 | <5 cm | <0.05 ng/l |
| Yes | T3~T4 | N1~N3 | No  | <2 | <5 cm | <0.05 ng/l |
| No  | T3~T4 | N1~N3 | No  | <2 | <5 cm | <0.05 ng/l |
| Yes | T3~T4 | N1~N3 | No  | <2 | <5 cm | <0.05 ng/l |
| No  | T3~T4 | N1~N3 | No  | <2 | <5 cm | <0.05 ng/l |
| No  | T3~T4 | N1~N3 | No  | <2 | <5 cm | <0.05 ng/l |
| Yes | T1~T2 | N1~N3 | No  | <2 | <5 cm | <0.05 ng/l |
| No  | T1~T2 | N1~N3 | No  | <2 | <5 cm | <0.05 ng/l |
| Yes | T3~T4 | N1~N3 | No  | <2 | <5 cm | <0.05 ng/l |
| No  | T3~T4 | N0    | No  | <2 | <5 cm | <0.05 ng/l |
| Yes | T1~T2 | N1~N3 | No  | ≥2 | <5 cm | <0.05 ng/l |
| No  | T1~T2 | N0    | No  | <2 | <5 cm | <0.05 ng/l |
| No  | T1~T2 | N1~N3 | No  | ≥2 | ≥5 cm | ≥0.05 ng/l |
| Yes | T1~T2 | N1~N3 | No  | <2 | ≥5 cm | <0.05 ng/l |
| Yes | T3~T4 | N1~N3 | Yes | <2 | ≥5 cm | <0.05 ng/l |
| No  | T3~T4 | N1~N3 | No  | ≥2 | <5 cm | <0.05 ng/l |
| No  | T3~T4 | N0    | No  | ≥2 | <5 cm | <0.05 ng/l |
| No  | T1~T2 | N0    | No  | ≥2 | <5 cm | <0.05 ng/l |
| No  | T1~T2 | N0    | No  | <2 | <5 cm | <0.05 ng/l |
| Yes | T1~T2 | N0    | No  | ≥2 | ≥5 cm | <0.05 ng/l |
| No  | T1~T2 | N0    | No  | ≥2 | <5 cm | ≥0.05 ng/l |
| Yes | T1~T2 | N0    | No  | <2 | <5 cm | ≥0.05 ng/l |
| Yes | T1~T2 | N0    | No  | <2 | ≥5 cm | <0.05 ng/l |
| No  | T1~T2 | N0    | No  | <2 | ≥5 cm | <0.05 ng/l |
| Yes | T1~T2 | N0    | No  | <2 | <5 cm | ≥0.05 ng/l |
| Yes | T1~T2 | N1~N3 | No  | <2 | <5 cm | ≥0.05 ng/l |
| No  | T1~T2 | N1~N3 | No  | <2 | <5 cm | ≥0.05 ng/l |

|     |       |       |     |    |       |            |
|-----|-------|-------|-----|----|-------|------------|
| Yes | T3~T4 | N0    | No  | <2 | <5 cm | <0.05 ng/l |
| Yes | T3~T4 | N1~N3 | No  | <2 | <5 cm | <0.05 ng/l |
| No  | T1~T2 | N0    | No  | <2 | <5 cm | ≥0.05 ng/l |
| Yes | T1~T2 | N1~N3 | No  | <2 | <5 cm | ≥0.05 ng/l |
| Yes | T1~T2 | N1~N3 | No  | ≥2 | <5 cm | <0.05 ng/l |
| Yes | T1~T2 | N0    | No  | <2 | <5 cm | ≥0.05 ng/l |
| No  | T3~T4 | N1~N3 | No  | ≥2 | <5 cm | ≥0.05 ng/l |
| No  | T1~T2 | N0    | No  | ≥2 | <5 cm | ≥0.05 ng/l |
| Yes | T3~T4 | N0    | No  | <2 | <5 cm | ≥0.05 ng/l |
| Yes | T1~T2 | N0    | No  | <2 | ≥5 cm | ≥0.05 ng/l |
| No  | T3~T4 | N0    | No  | <2 | <5 cm | <0.05 ng/l |
| Yes | T3~T4 | N0    | No  | ≥2 | <5 cm | ≥0.05 ng/l |
| No  | T1~T2 | N0    | No  | ≥2 | ≥5 cm | <0.05 ng/l |
| Yes | T1~T2 | N0    | Yes | <2 | <5 cm | <0.05 ng/l |
| Yes | T1~T2 | N0    | No  | <2 | <5 cm | <0.05 ng/l |
| No  | T1~T2 | N0    | No  | <2 | <5 cm | <0.05 ng/l |
| Yes | T1~T2 | N0    | No  | <2 | <5 cm | <0.05 ng/l |
| No  | T1~T2 | N0    | No  | <2 | <5 cm | <0.05 ng/l |
| No  | T1~T2 | N1~N3 | No  | <2 | <5 cm | <0.05 ng/l |
| Yes | T1~T2 | N0    | No  | <2 | <5 cm | <0.05 ng/l |
| Yes | T1~T2 | N0    | No  | <2 | <5 cm | <0.05 ng/l |
| No  | T1~T2 | N0    | No  | <2 | <5 cm | <0.05 ng/l |
| No  | T1~T2 | N0    | No  | <2 | <5 cm | <0.05 ng/l |
| Yes | T1~T2 | N0    | No  | <2 | <5 cm | <0.05 ng/l |
| No  | T1~T2 | N0    | No  | ≥2 | ≥5 cm | <0.05 ng/l |
| Yes | T1~T2 | N0    | No  | <2 | ≥5 cm | <0.05 ng/l |
| No  | T1~T2 | N0    | No  | <2 | <5 cm | ≥0.05 ng/l |
| No  | T1~T2 | N0    | No  | ≥2 | <5 cm | ≥0.05 ng/l |
| Yes | T1~T2 | N1~N3 | No  | ≥2 | ≥5 cm | <0.05 ng/l |
| No  | T3~T4 | N0    | No  | <2 | ≥5 cm | ≥0.05 ng/l |
| No  | T1~T2 | N1~N3 | No  | <2 | <5 cm | <0.05 ng/l |
| Yes | T3~T4 | N0    | No  | ≥2 | ≥5 cm | <0.05 ng/l |
| No  | T3~T4 | N0    | No  | ≥2 | ≥5 cm | <0.05 ng/l |
| Yes | T1~T2 | N0    | No  | ≥2 | <5 cm | <0.05 ng/l |
| No  | T1~T2 | N0    | No  | ≥2 | <5 cm | <0.05 ng/l |
| Yes | T1~T2 | N0    | No  | ≥2 | <5 cm | ≥0.05 ng/l |
| No  | T1~T2 | N0    | No  | ≥2 | <5 cm | <0.05 ng/l |
| No  | T1~T2 | N0    | No  | ≥2 | <5 cm | ≥0.05 ng/l |
| No  | T1~T2 | N0    | No  | <2 | <5 cm | ≥0.05 ng/l |
| Yes | T1~T2 | N0    | No  | <2 | ≥5 cm | ≥0.05 ng/l |
| No  | T1~T2 | N0    | No  | <2 | <5 cm | ≥0.05 ng/l |
| Yes | T1~T2 | N0    | No  | ≥2 | <5 cm | <0.05 ng/l |
| Yes | T1~T2 | N0    | Yes | ≥2 | ≥5 cm | <0.05 ng/l |
| Yes | T3~T4 | N0    | No  | ≥2 | <5 cm | <0.05 ng/l |
| Yes | T3~T4 | N0    | No  | ≥2 | ≥5 cm | ≥0.05 ng/l |
| No  | T1~T2 | N1~N3 | No  | ≥2 | ≥5 cm | <0.05 ng/l |
| No  | T1~T2 | N1~N3 | No  | ≥2 | ≥5 cm | <0.05 ng/l |
| Yes | T3~T4 | N1~N3 | No  | <2 | <5 cm | <0.05 ng/l |
| No  | T1~T2 | N0    | No  | ≥2 | <5 cm | <0.05 ng/l |
| Yes | T1~T2 | N0    | No  | <2 | ≥5 cm | <0.05 ng/l |
| Yes | T1~T2 | N0    | No  | <2 | <5 cm | <0.05 ng/l |
| Yes | T1~T2 | N0    | No  | ≥2 | ≥5 cm | <0.05 ng/l |
| No  | T1~T2 | N0    | No  | <2 | ≥5 cm | <0.05 ng/l |

|     |       |       |     |    |       |            |
|-----|-------|-------|-----|----|-------|------------|
| Yes | T1~T2 | N0    | No  | <2 | ≥5 cm | <0.05 ng/l |
| No  | T1~T2 | N0    | No  | <2 | ≥5 cm | <0.05 ng/l |
| No  | T1~T2 | N0    | No  | <2 | ≥5 cm | <0.05 ng/l |
| No  | T1~T2 | N0    | No  | <2 | <5 cm | <0.05 ng/l |
| No  | T1~T2 | N0    | Yes | <2 | <5 cm | <0.05 ng/l |
| No  | T1~T2 | N1~N3 | Yes | <2 | <5 cm | <0.05 ng/l |
| No  | T3~T4 | N0    | No  | <2 | <5 cm | <0.05 ng/l |
| No  | T1~T2 | N0    | No  | <2 | <5 cm | ≥0.05 ng/l |
| No  | T1~T2 | N0    | No  | <2 | <5 cm | <0.05 ng/l |
| No  | T1~T2 | N0    | No  | <2 | ≥5 cm | <0.05 ng/l |
| No  | T1~T2 | N0    | No  | <2 | ≥5 cm | <0.05 ng/l |
| No  | T1~T2 | N0    | No  | <2 | ≥5 cm | ≥0.05 ng/l |
| Yes | T1~T2 | N0    | No  | <2 | ≥5 cm | <0.05 ng/l |
| No  | T1~T2 | N0    | No  | ≥2 | <5 cm | <0.05 ng/l |
| Yes | T1~T2 | N0    | No  | <2 | <5 cm | ≥0.05 ng/l |
| Yes | T3~T4 | N0    | No  | ≥2 | <5 cm | <0.05 ng/l |
| Yes | T3~T4 | N0    | No  | ≥2 | <5 cm | <0.05 ng/l |
| Yes | T1~T2 | N0    | No  | ≥2 | <5 cm | <0.05 ng/l |
| No  | T3~T4 | N1~N3 | No  | <2 | <5 cm | <0.05 ng/l |
| Yes | T1~T2 | N0    | No  | <2 | <5 cm | <0.05 ng/l |
| Yes | T1~T2 | N0    | No  | <2 | <5 cm | <0.05 ng/l |
| Yes | T1~T2 | N0    | No  | <2 | <5 cm | <0.05 ng/l |
| No  | T3~T4 | N0    | Yes | <2 | <5 cm | <0.05 ng/l |
| No  | T1~T2 | N0    | Yes | <2 | <5 cm | <0.05 ng/l |
| No  | T1~T2 | N0    | Yes | <2 | <5 cm | <0.05 ng/l |
| No  | T3~T4 | N0    | No  | <2 | <5 cm | <0.05 ng/l |
| Yes | T1~T2 | N0    | No  | <2 | <5 cm | <0.05 ng/l |
| Yes | T1~T2 | N0    | No  | <2 | ≥5 cm | <0.05 ng/l |
| No  | T1~T2 | N0    | No  | <2 | ≥5 cm | <0.05 ng/l |
| Yes | T1~T2 | N0    | No  | <2 | <5 cm | <0.05 ng/l |
| No  | T1~T2 | N0    | No  | <2 | <5 cm | <0.05 ng/l |
| Yes | T1~T2 | N0    | No  | <2 | <5 cm | <0.05 ng/l |
| Yes | T1~T2 | N1~N3 | No  | <2 | <5 cm | ≥0.05 ng/l |
| Yes | T1~T2 | N0    | No  | <2 | <5 cm | <0.05 ng/l |
| Yes | T1~T2 | N0    | No  | <2 | <5 cm | ≥0.05 ng/l |
| Yes | T1~T2 | N1~N3 | No  | <2 | <5 cm | ≥0.05 ng/l |
| Yes | T1~T2 | N0    | No  | <2 | <5 cm | ≥0.05 ng/l |
| No  | T3~T4 | N1~N3 | No  | <2 | <5 cm | <0.05 ng/l |
| Yes | T1~T2 | N0    | No  | <2 | <5 cm | <0.05 ng/l |
| No  | T3~T4 | N0    | No  | <2 | <5 cm | <0.05 ng/l |
| Yes | T1~T2 | N0    | No  | <2 | ≥5 cm | <0.05 ng/l |
| Yes | T1~T2 | N0    | No  | <2 | <5 cm | <0.05 ng/l |
| No  | T1~T2 | N0    | No  | <2 | <5 cm | <0.05 ng/l |
| Yes | T1~T2 | N0    | No  | <2 | <5 cm | <0.05 ng/l |
| No  | T1~T2 | N0    | No  | <2 | <5 cm | <0.05 ng/l |
| Yes | T1~T2 | N0    | No  | <2 | ≥5 cm | <0.05 ng/l |
| Yes | T1~T2 | N0    | No  | <2 | ≥5 cm | <0.05 ng/l |
| Yes | T3~T4 | N0    | No  | <2 | <5 cm | <0.05 ng/l |
| Yes | T3~T4 | N0    | No  | <2 | ≥5 cm | <0.05 ng/l |
| No  | T3~T4 | N1~N3 | Yes | ≥2 | <5 cm | <0.05 ng/l |
| No  | T1~T2 | N0    | No  | ≥2 | ≥5 cm | <0.05 ng/l |
| Yes | T3~T4 | N0    | No  | <2 | ≥5 cm | <0.05 ng/l |
| Yes | T1~T2 | N1~N3 | Yes | <2 | <5 cm | <0.05 ng/l |
| No  | T1~T2 | N0    | No  | <2 | <5 cm | <0.05 ng/l |

|     |       |       |     |    |       |            |
|-----|-------|-------|-----|----|-------|------------|
| No  | T1~T2 | N0    | No  | <2 | <5 cm | <0.05 ng/l |
| No  | T1~T2 | N0    | No  | ≥2 | <5 cm | ≥0.05 ng/l |
| No  | T1~T2 | N0    | No  | <2 | <5 cm | ≥0.05 ng/l |
| Yes | T1~T2 | N0    | No  | <2 | <5 cm | <0.05 ng/l |
| No  | T1~T2 | N0    | No  | ≥2 | <5 cm | ≥0.05 ng/l |
| Yes | T1~T2 | N0    | No  | <2 | <5 cm | ≥0.05 ng/l |
| Yes | T1~T2 | N0    | No  | <2 | <5 cm | <0.05 ng/l |
| No  | T1~T2 | N1~N3 | No  | <2 | <5 cm | ≥0.05 ng/l |
| No  | T1~T2 | N1~N3 | No  | <2 | <5 cm | <0.05 ng/l |
| No  | T1~T2 | N1~N3 | No  | <2 | <5 cm | ≥0.05 ng/l |
| No  | T1~T2 | N0    | No  | <2 | <5 cm | <0.05 ng/l |
| Yes | T3~T4 | N1~N3 | No  | <2 | <5 cm | <0.05 ng/l |
| No  | T1~T2 | N0    | No  | <2 | <5 cm | ≥0.05 ng/l |
| No  | T3~T4 | N0    | No  | <2 | <5 cm | ≥0.05 ng/l |
| No  | T1~T2 | N0    | Yes | <2 | ≥5 cm | <0.05 ng/l |
| Yes | T1~T2 | N0    | No  | <2 | <5 cm | <0.05 ng/l |
| Yes | T1~T2 | N0    | No  | <2 | ≥5 cm | <0.05 ng/l |
| No  | T1~T2 | N0    | No  | <2 | ≥5 cm | <0.05 ng/l |
| No  | T1~T2 | N0    | No  | ≥2 | <5 cm | <0.05 ng/l |
| Yes | T1~T2 | N0    | Yes | <2 | ≥5 cm | <0.05 ng/l |
| Yes | T1~T2 | N0    | No  | ≥2 | ≥5 cm | <0.05 ng/l |
| Yes | T1~T2 | N1~N3 | No  | <2 | <5 cm | <0.05 ng/l |
| No  | T1~T2 | N0    | No  | <2 | <5 cm | <0.05 ng/l |
| No  | T1~T2 | N0    | No  | ≥2 | ≥5 cm | <0.05 ng/l |
| No  | T3~T4 | N0    | No  | ≥2 | ≥5 cm | <0.05 ng/l |
| No  | T3~T4 | N0    | No  | ≥2 | ≥5 cm | <0.05 ng/l |
| Yes | T1~T2 | N0    | Yes | <2 | <5 cm | ≥0.05 ng/l |
| Yes | T3~T4 | N0    | No  | <2 | <5 cm | ≥0.05 ng/l |
| No  | T1~T2 | N0    | No  | ≥2 | <5 cm | <0.05 ng/l |
| No  | T1~T2 | N1~N3 | Yes | <2 | <5 cm | <0.05 ng/l |
| No  | T1~T2 | N0    | Yes | ≥2 | <5 cm | ≥0.05 ng/l |
| No  | T1~T2 | N0    | No  | <2 | <5 cm | <0.05 ng/l |
| Yes | T1~T2 | N0    | No  | <2 | <5 cm | ≥0.05 ng/l |
| Yes | T1~T2 | N0    | No  | <2 | <5 cm | ≥0.05 ng/l |
| No  | T3~T4 | N0    | No  | <2 | ≥5 cm | ≥0.05 ng/l |
| No  | T1~T2 | N0    | No  | <2 | ≥5 cm | <0.05 ng/l |
| No  | T3~T4 | N0    | No  | <2 | <5 cm | <0.05 ng/l |
| No  | T1~T2 | N0    | No  | <2 | <5 cm | <0.05 ng/l |
| No  | T3~T4 | N0    | No  | <2 | ≥5 cm | <0.05 ng/l |
| Yes | T1~T2 | N0    | No  | <2 | ≥5 cm | <0.05 ng/l |
| No  | T3~T4 | N1~N3 | No  | <2 | <5 cm | ≥0.05 ng/l |
| Yes | T3~T4 | N0    | No  | <2 | ≥5 cm | ≥0.05 ng/l |
| No  | T1~T2 | N0    | No  | <2 | <5 cm | <0.05 ng/l |
| Yes | T1~T2 | N0    | No  | <2 | ≥5 cm | ≥0.05 ng/l |
| No  | T1~T2 | N0    | No  | <2 | <5 cm | <0.05 ng/l |
| No  | T1~T2 | N0    | No  | <2 | <5 cm | <0.05 ng/l |
| No  | T1~T2 | N0    | No  | <2 | ≥5 cm | ≥0.05 ng/l |
| Yes | T1~T2 | N0    | No  | <2 | <5 cm | <0.05 ng/l |
| No  | T1~T2 | N0    | No  | <2 | <5 cm | <0.05 ng/l |
| No  | T1~T2 | N0    | No  | ≥2 | ≥5 cm | <0.05 ng/l |
| No  | T1~T2 | N0    | No  | ≥2 | <5 cm | <0.05 ng/l |
| Yes | T1~T2 | N1~N3 | No  | <2 | <5 cm | ≥0.05 ng/l |
| Yes | T1~T2 | N1~N3 | No  | <2 | <5 cm | ≥0.05 ng/l |
| Yes | T1~T2 | N0    | Yes | <2 | ≥5 cm | ≥0.05 ng/l |
| Yes | T1~T2 | N1~N3 | No  | <2 | ≥5 cm | ≥0.05 ng/l |

|     |       |       |     |    |       |            |
|-----|-------|-------|-----|----|-------|------------|
| No  | T1~T2 | N0    | No  | <2 | ≥5 cm | <0.05 ng/l |
| Yes | T1~T2 | N1~N3 | Yes | <2 | <5 cm | ≥0.05 ng/l |
| No  | T3~T4 | N0    | No  | <2 | <5 cm | ≥0.05 ng/l |
| No  | T1~T2 | N0    | Yes | <2 | <5 cm | <0.05 ng/l |
| No  | T1~T2 | N0    | No  | <2 | <5 cm | ≥0.05 ng/l |
| No  | T3~T4 | N0    | Yes | <2 | <5 cm | <0.05 ng/l |
| Yes | T1~T2 | N0    | No  | <2 | <5 cm | ≥0.05 ng/l |
| No  | T1~T2 | N0    | Yes | <2 | <5 cm | <0.05 ng/l |
| No  | T1~T2 | N0    | No  | <2 | ≥5 cm | <0.05 ng/l |
| No  | T3~T4 | N0    | No  | <2 | <5 cm | <0.05 ng/l |
| No  | T1~T2 | N0    | No  | <2 | <5 cm | <0.05 ng/l |
| No  | T1~T2 | N0    | No  | <2 | <5 cm | <0.05 ng/l |
| No  | T1~T2 | N0    | No  | <2 | ≥5 cm | <0.05 ng/l |
| Yes | T1~T2 | N0    | No  | <2 | <5 cm | <0.05 ng/l |
| No  | T3~T4 | N1~N3 | No  | <2 | <5 cm | <0.05 ng/l |
| No  | T3~T4 | N0    | No  | <2 | ≥5 cm | <0.05 ng/l |
| Yes | T1~T2 | N0    | No  | <2 | ≥5 cm | <0.05 ng/l |
| No  | T1~T2 | N0    | No  | <2 | <5 cm | <0.05 ng/l |
| Yes | T1~T2 | N0    | No  | <2 | <5 cm | <0.05 ng/l |
| Yes | T1~T2 | N0    | No  | <2 | ≥5 cm | <0.05 ng/l |
| No  | T1~T2 | N0    | No  | <2 | ≥5 cm | <0.05 ng/l |
| No  | T1~T2 | N0    | No  | <2 | <5 cm | ≥0.05 ng/l |
| No  | T1~T2 | N1~N3 | No  | <2 | ≥5 cm | <0.05 ng/l |
| Yes | T1~T2 | N0    | No  | <2 | <5 cm | ≥0.05 ng/l |
| No  | T1~T2 | N0    | No  | <2 | <5 cm | ≥0.05 ng/l |
| Yes | T1~T2 | N0    | No  | <2 | ≥5 cm | <0.05 ng/l |
| No  | T1~T2 | N0    | No  | <2 | ≥5 cm | ≥0.05 ng/l |
| No  | T1~T2 | N0    | No  | <2 | ≥5 cm | <0.05 ng/l |
| No  | T1~T2 | N1~N3 | No  | <2 | <5 cm | ≥0.05 ng/l |
| Yes | T1~T2 | N1~N3 | No  | <2 | ≥5 cm | <0.05 ng/l |
| Yes | T3~T4 | N0    | No  | <2 | <5 cm | ≥0.05 ng/l |
| No  | T3~T4 | N0    | No  | <2 | <5 cm | <0.05 ng/l |
| Yes | T1~T2 | N0    | No  | <2 | <5 cm | <0.05 ng/l |
| Yes | T3~T4 | N0    | No  | <2 | <5 cm | ≥0.05 ng/l |
| No  | T1~T2 | N0    | Yes | <2 | <5 cm | ≥0.05 ng/l |
| No  | T3~T4 | N0    | No  | <2 | <5 cm | <0.05 ng/l |
| Yes | T1~T2 | N0    | Yes | <2 | <5 cm | ≥0.05 ng/l |
| Yes | T1~T2 | N0    | No  | ≥2 | <5 cm | <0.05 ng/l |
| No  | T1~T2 | N0    | No  | ≥2 | <5 cm | <0.05 ng/l |
| Yes | T1~T2 | N0    | Yes | ≥2 | <5 cm | ≥0.05 ng/l |
| Yes | T1~T2 | N0    | No  | <2 | <5 cm | <0.05 ng/l |
| Yes | T1~T2 | N0    | No  | <2 | <5 cm | <0.05 ng/l |
| No  | T1~T2 | N0    | No  | <2 | <5 cm | <0.05 ng/l |
| No  | T1~T2 | N0    | No  | <2 | <5 cm | <0.05 ng/l |
| No  | T1~T2 | N1~N3 | No  | <2 | <5 cm | <0.05 ng/l |
| Yes | T1~T2 | N1~N3 | No  | <2 | <5 cm | <0.05 ng/l |
| No  | T1~T2 | N1~N3 | No  | <2 | ≥5 cm | <0.05 ng/l |
| No  | T1~T2 | N0    | No  | <2 | ≥5 cm | <0.05 ng/l |
| No  | T1~T2 | N0    | Yes | <2 | ≥5 cm | <0.05 ng/l |
| Yes | T3~T4 | N1~N3 | Yes | <2 | <5 cm | <0.05 ng/l |
| No  | T3~T4 | N0    | Yes | <2 | <5 cm | ≥0.05 ng/l |
| Yes | T3~T4 | N0    | No  | <2 | ≥5 cm | ≥0.05 ng/l |
| Yes | T1~T2 | N0    | Yes | <2 | ≥5 cm | ≥0.05 ng/l |
| No  | T1~T2 | N0    | No  | ≥2 | <5 cm | <0.05 ng/l |



|     |       |       |     |    |       |            |
|-----|-------|-------|-----|----|-------|------------|
| Yes | T1~T2 | N0    | No  | <2 | <5 cm | <0.05 ng/l |
| Yes | T1~T2 | N0    | No  | <2 | <5 cm | ≥0.05 ng/l |
| Yes | T1~T2 | N0    | Yes | ≥2 | <5 cm | ≥0.05 ng/l |
| Yes | T1~T2 | N1~N3 | No  | <2 | <5 cm | ≥0.05 ng/l |
| Yes | T1~T2 | N0    | No  | ≥2 | ≥5 cm | ≥0.05 ng/l |
| Yes | T1~T2 | N1~N3 | No  | <2 | <5 cm | ≥0.05 ng/l |
| Yes | T1~T2 | N1~N3 | No  | <2 | <5 cm | ≥0.05 ng/l |
| Yes | T1~T2 | N0    | No  | <2 | <5 cm | ≥0.05 ng/l |
| Yes | T1~T2 | N1~N3 | No  | <2 | <5 cm | ≥0.05 ng/l |
| No  | T1~T2 | N0    | No  | <2 | <5 cm | <0.05 ng/l |
| No  | T1~T2 | N1~N3 | No  | <2 | ≥5 cm | <0.05 ng/l |
| No  | T3~T4 | N0    | No  | <2 | <5 cm | <0.05 ng/l |
| Yes | T1~T2 | N0    | No  | <2 | ≥5 cm | ≥0.05 ng/l |
| No  | T3~T4 | N0    | No  | <2 | <5 cm | <0.05 ng/l |
| No  | T1~T2 | N0    | No  | <2 | ≥5 cm | ≥0.05 ng/l |
| Yes | T1~T2 | N0    | No  | <2 | <5 cm | <0.05 ng/l |
| No  | T3~T4 | N0    | No  | <2 | ≥5 cm | ≥0.05 ng/l |
| No  | T1~T2 | N0    | Yes | <2 | <5 cm | <0.05 ng/l |
| No  | T1~T2 | N0    | No  | ≥2 | ≥5 cm | ≥0.05 ng/l |
| Yes | T1~T2 | N0    | No  | ≥2 | <5 cm | ≥0.05 ng/l |
| Yes | T1~T2 | N0    | No  | ≥2 | <5 cm | ≥0.05 ng/l |
| No  | T1~T2 | N1~N3 | Yes | <2 | <5 cm | <0.05 ng/l |
| Yes | T1~T2 | N1~N3 | No  | <2 | <5 cm | <0.05 ng/l |
| No  | T3~T4 | N1~N3 | Yes | <2 | <5 cm | <0.05 ng/l |
| Yes | T1~T2 | N0    | No  | ≥2 | <5 cm | <0.05 ng/l |
| No  | T1~T2 | N1~N3 | Yes | <2 | <5 cm | <0.05 ng/l |
| Yes | T1~T2 | N0    | No  | ≥2 | <5 cm | <0.05 ng/l |
| Yes | T1~T2 | N0    | No  | <2 | <5 cm | <0.05 ng/l |
| Yes | T1~T2 | N0    | No  | ≥2 | <5 cm | <0.05 ng/l |
| No  | T1~T2 | N0    | No  | ≥2 | <5 cm | <0.05 ng/l |
| Yes | T1~T2 | N0    | No  | <2 | <5 cm | <0.05 ng/l |
| Yes | T1~T2 | N0    | No  | <2 | ≥5 cm | <0.05 ng/l |
| No  | T1~T2 | N0    | No  | ≥2 | <5 cm | ≥0.05 ng/l |
| No  | T1~T2 | N0    | No  | ≥2 | <5 cm | <0.05 ng/l |
| No  | T1~T2 | N0    | No  | ≥2 | <5 cm | <0.05 ng/l |
| No  | T1~T2 | N1~N3 | Yes | <2 | <5 cm | <0.05 ng/l |
| No  | T1~T2 | N0    | No  | <2 | <5 cm | <0.05 ng/l |
| No  | T3~T4 | N0    | No  | <2 | <5 cm | <0.05 ng/l |
| No  | T1~T2 | N1~N3 | No  | <2 | <5 cm | <0.05 ng/l |
| No  | T3~T4 | N1~N3 | No  | <2 | <5 cm | <0.05 ng/l |
| No  | T1~T2 | N0    | No  | <2 | <5 cm | <0.05 ng/l |
| No  | T3~T4 | N0    | No  | <2 | <5 cm | <0.05 ng/l |
| No  | T1~T2 | N0    | No  | <2 | <5 cm | ≥0.05 ng/l |
| No  | T3~T4 | N0    | No  | <2 | <5 cm | ≥0.05 ng/l |
| No  | T1~T2 | N0    | No  | <2 | ≥5 cm | ≥0.05 ng/l |
| Yes | T1~T2 | N0    | No  | <2 | ≥5 cm | <0.05 ng/l |
| No  | T1~T2 | N0    | No  | <2 | ≥5 cm | ≥0.05 ng/l |
| Yes | T3~T4 | N1~N3 | No  | ≥2 | ≥5 cm | ≥0.05 ng/l |
| No  | T1~T2 | N0    | No  | ≥2 | <5 cm | <0.05 ng/l |
| No  | T3~T4 | N0    | No  | <2 | ≥5 cm | ≥0.05 ng/l |
| No  | T1~T2 | N0    | Yes | ≥2 | ≥5 cm | <0.05 ng/l |
| Yes | T1~T2 | N0    | Yes | <2 | ≥5 cm | <0.05 ng/l |
| No  | T1~T2 | N0    | No  | ≥2 | ≥5 cm | <0.05 ng/l |

|     |       |       |     |    |       |            |
|-----|-------|-------|-----|----|-------|------------|
| Yes | T3~T4 | N0    | No  | <2 | <5 cm | <0.05 ng/l |
| No  | T1~T2 | N0    | Yes | <2 | <5 cm | <0.05 ng/l |
| No  | T1~T2 | N0    | Yes | <2 | <5 cm | <0.05 ng/l |
| Yes | T3~T4 | N0    | Yes | <2 | <5 cm | <0.05 ng/l |
| Yes | T3~T4 | N0    | No  | <2 | <5 cm | <0.05 ng/l |
| Yes | T3~T4 | N1~N3 | No  | <2 | <5 cm | <0.05 ng/l |
| Yes | T1~T2 | N0    | No  | <2 | <5 cm | <0.05 ng/l |
| No  | T3~T4 | N1~N3 | No  | <2 | <5 cm | ≥0.05 ng/l |
| No  | T1~T2 | N1~N3 | No  | <2 | <5 cm | ≥0.05 ng/l |
| Yes | T1~T2 | N0    | No  | <2 | ≥5 cm | <0.05 ng/l |
| No  | T1~T2 | N1~N3 | No  | <2 | ≥5 cm | <0.05 ng/l |
| No  | T1~T2 | N0    | No  | <2 | <5 cm | <0.05 ng/l |
| Yes | T1~T2 | N0    | No  | <2 | ≥5 cm | ≥0.05 ng/l |
| Yes | T1~T2 | N0    | No  | <2 | <5 cm | ≥0.05 ng/l |
| Yes | T1~T2 | N0    | No  | <2 | <5 cm | ≥0.05 ng/l |
| No  | T1~T2 | N0    | Yes | ≥2 | <5 cm | ≥0.05 ng/l |
| Yes | T1~T2 | N0    | Yes | ≥2 | ≥5 cm | <0.05 ng/l |
| No  | T1~T2 | N0    | No  | ≥2 | ≥5 cm | <0.05 ng/l |
| No  | T1~T2 | N0    | Yes | ≥2 | <5 cm | <0.05 ng/l |
| Yes | T1~T2 | N0    | No  | <2 | ≥5 cm | <0.05 ng/l |
| Yes | T1~T2 | N1~N3 | No  | <2 | ≥5 cm | ≥0.05 ng/l |
| Yes | T1~T2 | N1~N3 | No  | <2 | <5 cm | <0.05 ng/l |
| Yes | T1~T2 | N1~N3 | Yes | ≥2 | ≥5 cm | ≥0.05 ng/l |
| No  | T3~T4 | N0    | No  | <2 | ≥5 cm | ≥0.05 ng/l |
| No  | T3~T4 | N0    | No  | <2 | ≥5 cm | ≥0.05 ng/l |
| No  | T1~T2 | N0    | Yes | ≥2 | <5 cm | <0.05 ng/l |
| No  | T1~T2 | N0    | No  | <2 | <5 cm | <0.05 ng/l |
| No  | T1~T2 | N0    | Yes | <2 | ≥5 cm | <0.05 ng/l |
| No  | T3~T4 | N0    | Yes | <2 | ≥5 cm | <0.05 ng/l |
| No  | T1~T2 | N0    | Yes | <2 | ≥5 cm | <0.05 ng/l |
| No  | T3~T4 | N0    | No  | <2 | ≥5 cm | ≥0.05 ng/l |
| Yes | T3~T4 | N0    | No  | <2 | <5 cm | <0.05 ng/l |
| Yes | T1~T2 | N0    | Yes | <2 | <5 cm | <0.05 ng/l |
| No  | T1~T2 | N0    | No  | <2 | <5 cm | <0.05 ng/l |
| No  | T1~T2 | N0    | No  | <2 | <5 cm | <0.05 ng/l |
| No  | T1~T2 | N0    | No  | <2 | <5 cm | <0.05 ng/l |
| Yes | T1~T2 | N1~N3 | No  | <2 | <5 cm | <0.05 ng/l |
| Yes | T3~T4 | N1~N3 | No  | ≥2 | <5 cm | <0.05 ng/l |
| No  | T1~T2 | N1~N3 | No  | ≥2 | ≥5 cm | <0.05 ng/l |
| No  | T1~T2 | N1~N3 | No  | <2 | ≥5 cm | ≥0.05 ng/l |
| No  | T1~T2 | N0    | No  | ≥2 | <5 cm | <0.05 ng/l |
| No  | T1~T2 | N0    | No  | <2 | <5 cm | ≥0.05 ng/l |
| No  | T1~T2 | N0    | No  | <2 | <5 cm | <0.05 ng/l |
| No  | T1~T2 | N0    | No  | <2 | <5 cm | <0.05 ng/l |
| No  | T3~T4 | N0    | No  | <2 | <5 cm | <0.05 ng/l |
| No  | T1~T2 | N0    | No  | <2 | ≥5 cm | <0.05 ng/l |
| No  | T1~T2 | N0    | No  | <2 | <5 cm | <0.05 ng/l |
| No  | T1~T2 | N0    | No  | <2 | ≥5 cm | <0.05 ng/l |
| No  | T1~T2 | N0    | No  | ≥2 | <5 cm | <0.05 ng/l |
| No  | T3~T4 | N0    | No  | ≥2 | ≥5 cm | <0.05 ng/l |
| Yes | T1~T2 | N1~N3 | No  | <2 | <5 cm | ≥0.05 ng/l |
| No  | T1~T2 | N1~N3 | No  | <2 | ≥5 cm | <0.05 ng/l |
